# Supplementary material for: Regioselective synthesis of imidazo[1,5-a]quinoxalines and methyl N-phenylbenzimidats on an ionic liquid support
Source: Royal Society of Chemistry journal article supplement (doi:10.1039/c6ra11861e), 2016-01-01
Supplement: c6ra11861e1.pdf [file c6ra11861e1.pdf]

## Supporting Information

### Regioselective Synthesis of Imidazo[1,5-*a*]quinoxalines and Methyl *N*-Phenylbenzimidats on Ionic Liquid Support

Li-Hsun Chen,<sup>a</sup> Chih-Hsien Kao,<sup>a</sup> Sandip Dhole,<sup>a</sup> Indrajeet J. Barve,<sup>a</sup> Li-Ching Shen,<sup>a</sup>

Wen-Sheng Chung\*<sup>a</sup> and Chung-Ming Sun\*<sup>a,b</sup>

<sup>a</sup>Department of Applied Chemistry, National Chiao Tung University, Hsinchu 300-10, Taiwan,

ROC

<sup>b</sup>Department of Medicinal and Applied Chemistry, Kaohsiung Medical University, 100, Shih-

Chuan 1<sup>st</sup> Road, Kaohsiung 807-08, Taiwan, ROC

Email: cmsun@mail.nctu.edu.tw

#### Table of contents

|                                                                                                      |         |
|------------------------------------------------------------------------------------------------------|---------|
| 1. General methods.....                                                                              | S1      |
| 2. Experimental procedures.....                                                                      | S2-6    |
| 3. Stepwise proton NMR monitoring of the synthesis of <b>6</b> .....                                 | S7      |
| 4. Characterization Data for Compound <b>12b-s</b> .....                                             | S8-19   |
| 5. Characterization Data for Compound <b>13b-i</b> .....                                             | S20-25  |
| 6. Characterization Data for Compound <b>14b-c</b> .....                                             | S26-27  |
| 7. <sup>1</sup> H NMR, <sup>13</sup> C NMR, LRMS, HRMS and IR spectra of Compound <b>12a-s</b> ..... | S28-122 |

|                                                                                        |          |
|----------------------------------------------------------------------------------------|----------|
| 8. $^1\text{H}$ NMR, $^{13}\text{C}$ NMR, LRMS and HRMS of Compound <b>13a-i</b> ..... | S123-159 |
| 9. $^1\text{H}$ NMR, $^{13}\text{C}$ NMR, LRMS and HRMS of Compound <b>14a-c</b> ....  | S160-171 |
| 10. X-ray crystal data of compound <b>12a</b> .....                                    | S172-180 |
| 11. X-ray crystal data of compound <b>13c</b> .....                                    | S181-189 |

## 1. General Methods

Chemical shifts are reported in parts per million (ppm) on the  $\delta$  scale from an internal standard (TMS) and coupling constants are reported in Hertz. Analytical thin-layer chromatography (TLC) was performed using 0.25 mm silica gel-coated Kieselgel 60 F<sub>254</sub> plates. Compound purification was carried out by flash chromatography using the indicated solvent and silica gel 60 (Merck, 230-400 mesh). Microwave irradiation experiments were carried out in 5 mL glass vials sealed with Teflon<sup>®</sup> cap in a CEM-Discover microwave instrument using irradiation power from 0 to 100 W. High-resolution mass spectra (HRMS) were recorded in ESI mode using a magnetic sector mass analyzer and TOF mass spectrometer. IR spectra were obtained using FT-IR spectrometer. All reagents were purchased from commercial sources and used without further purification.

## 2. Experimental procedures

### General procedure for the synthesis of IL-attached amine **6**

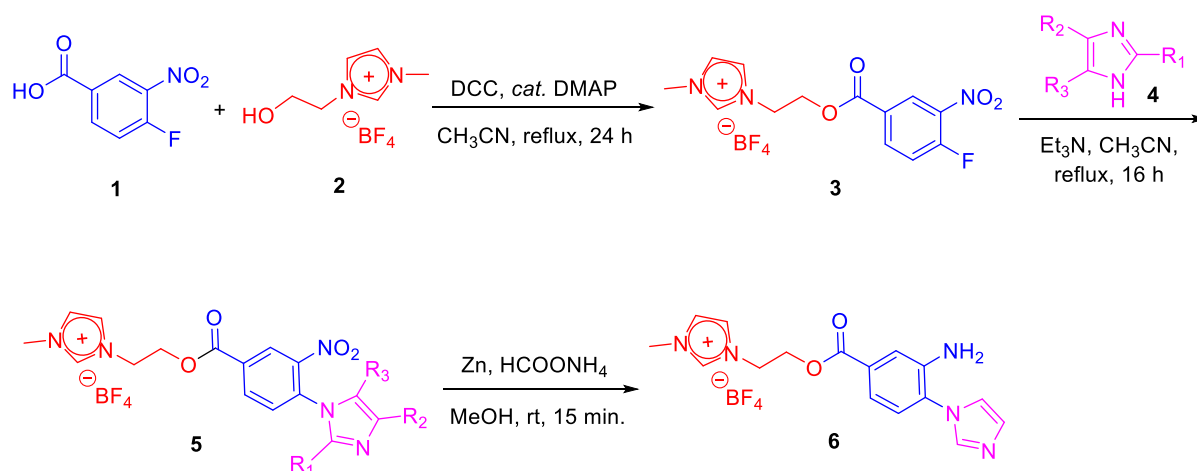

To the stirred solution of 4-fluoro-3-nitrobenzoic acid **1** (1.12 mmol, 1.2 equiv) in acetonitrile was added DCC (1.12 mmol, 1.2 equiv), DMAP (0.04 mmol, 0.05 equiv), and 1-(2-hydroxyethyl)-3-methylimidazolium tetrafluoroborate ([hydremim][BF<sub>4</sub>]) **2** (0.93 mmol, 1 equiv). The reaction mixture was refluxed for 24 h. After completion of the reaction, dicyclohexylurea was filtered off, and the filtrate was concentrated. The crude residue was washed with cold diethyl ether (50 mL × 3) and dried *in vacuo* to afford **3** in 96% yield. A mixture of **3** (1.41 mmol, 1 equiv), triethyl amine (7.05 mmol, 5 equiv) and imidazole **4** (1.7 mmol, 1.2 equiv) in acetonitrile was refluxed for 16 h. After completion of the reaction, the solvent was evaporated under reduced pressure. The reaction mixture was precipitated and washed with cold diethyl ether (50 mL × 3). The precipitate was dried to give **5** in 90% yield. To a stirred solution of **5** in methanol were added zinc (8.96 mmol, 7 equiv) and ammonium formate (19.2



mmol, 15 equiv), and the reaction mixture was stirred at room temperature for 15 min. After completion of the reaction, the reaction mixture was filtered through a Celite bed to remove zinc, and the filtrate was concentrated. Dichloromethane (30 mL) was added to the crude residue to precipitate ammonium formate, and the mixture was again passed through a Celite bed. The filtrate was concentrated to yield **6** in 88% yield.

### General experimental procedure for the synthesis of methyl 4,4-dimethyl-4,5-dihydroimidazo[1,5-a]quinoxaline-7-carboxylate (**12a**)

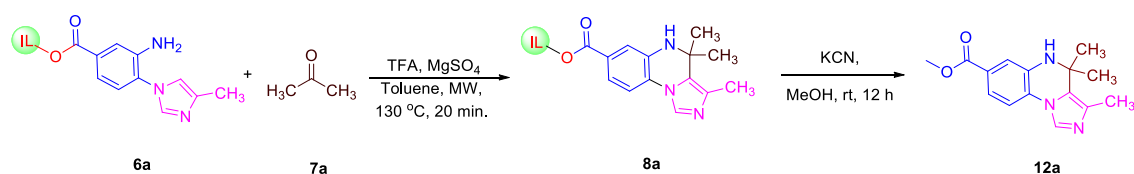

To a stirred solution of acetone **7a** (0.055 g, 0.96 mmol) in toluene (10 mL) was added trifluoroacetic acid (0.01 mL), amine **6a** (0.1 g 0.32 mmol) and  $\text{MgSO}_4$  (0.1 g, w/w) at room temperature. The resulting reaction mixture was irradiated in microwave for 20 min at 130 °C (250 W). The progress of the reaction was monitored by regular proton NMR. After completion of the reaction, reaction mixture was filtered to remove  $\text{MgSO}_4$ . The solvent was evaporated under reduced pressure. The residue of **8a** was washed with excess of cold ether (25 mL x 3) and dried *in vacuo*. The crude product obtained was used as it is for methanolysis reaction. To a stirred solution of **8a** (0.1 g, 0.227 mmol) in methanol (20 mL) was added potassium cyanide (0.103 g, 1.59 mmol) and the

reaction mixture was stirred at room temperature for 2 h. The solvent was removed under reduced pressure and the reaction mixture was precipitated and washed with diethyl ether (50 mL). The combined organic layers were concentrated under vacuum. The crude product was purified by flash chromatography (eluent: 20 % EA in hexanes) to obtain the corresponding imidazo[1,5-*a*]quinoxaline **12a** (0.051 g, 89 %). This procedure was used for the synthesis of all the rest derivatives of **12**.

**Methyl 4,5-dihydro-3,4,4-trimethylimidazo[1,5-*a*]quinoxaline-7-carboxylate (12a)**

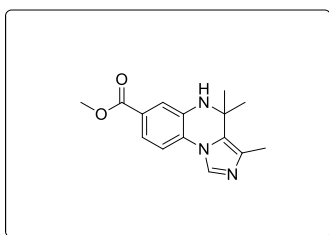

$^1\text{H}$  NMR (300 MHz,  $\text{CDCl}_3$ )  $\delta$  7.93 (s, 1H), 7.54 (dd,  $J = 8.3, 1.7$  Hz, 1H), 7.47 (d,  $J = 1.7$  Hz, 1H), 7.41 (d,  $J = 8.3$  Hz, 1H), 3.91 (s, 3H), 3.88 (s, NH), 2.36 (s, 3H), 1.58 (s, 6H);  $^{13}\text{C}$  NMR (75 MHz,  $\text{CDCl}_3$ )  $\delta$  166.9, 135.2, 131.6, 129.5, 128.1, 127.1, 125.9, 120.9, 117.3, 114.9, 52.6, 52.2, 29.6, 14.8; MS (ESI,  $m/z$ ): 272 ( $\text{M}+\text{H}$ ) $^+$ ; HRMS (ESI,  $m/z$ ) calcd for  $\text{C}_{15}\text{H}_{18}\text{N}_3\text{O}_2$  [ $\text{M}+\text{H}$ ] $^+$  272.1399, found 272.1397; IR ( $\text{cm}^{-1}$ , neat): 3349, 2956, 2923, 1710.

**General experimental procedure for the synthesis of (Z)-methyl 4-(1H-imidazol-1-yl)-3-((methoxy(4-nitrophenyl)methylene)amino)benzoate (13a)**

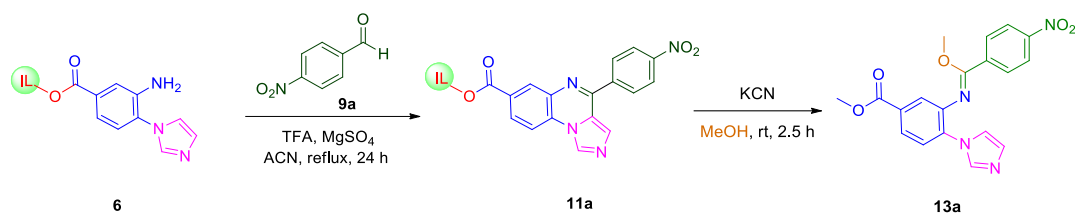

To a stirred solution of 4-nitrobenzaldehyde **9a** (0.11 g, 0.75 mmol) in acetonitrile (10 mL) was added trifluoroacetic acid (0.01 mL), amine **6** (0.1 g, 0.25 mmol) and  $\text{MgSO}_4$  (0.1 g, w/w) at room temperature. The reaction mixture was refluxed for 24 h. Progress of the reaction was directly monitored by proton NMR with ionic liquid support attached. After completion of the reaction,  $\text{MgSO}_4$  was removed by filtration and the filtrate was evaporated under reduced pressure. The crude product **11a** was washed with excess of cold diethyl ether (25 mL x 3) and dried *in vacuo*. The obtained crude product was used as it is for the next step. To a stirred solution of **11a** (0.1 g, 0.18 mmol) in methanol (20 mL) was added potassium cyanide (0.085 g, 1.32 mmol) and the reaction mixture was stirred at room temperature for 2.5 h. The solvent was evaporated under reduced pressure. To the crude residue of **13a**, cold diethyl ether (10 mL) was added to precipitate ionic liquid support. The precipitated ionic liquid support was filtered and washed with excess of cold diethyl ether (10 mL x 3). The filtrate was concentrated under vacuum. The crude product was purified by flash chromatography (eluent: 55 % EA in hexanes) to afford (*Z*)-methyl 4-(1H-imidazol-1-yl)-3-((methoxy(4-nitrophenyl) methylene) amino) benzoate **13a** (0.061 g, 85 %). This procedure was used for the synthesis of the rest all derivatives of **13**.

**(Z)-methyl 4-(1H-imidazol-1-yl)-3-((methoxy(4-nitrophenyl)methylene)amino)benzoate (13a)**

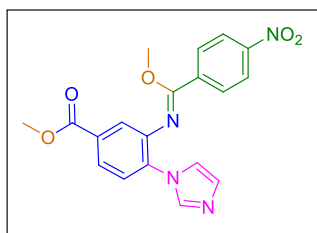

Pale yellow solid, 147-149 °C;  $^1\text{H}$  NMR (300 MHz,  $\text{CDCl}_3$ )  $\delta$  8.03 (d,  $J = 8.7$  Hz, 2H), 7.77 (dd,  $J = 8.2, 1.8$  Hz, 1H), 7.58 (d,  $J = 1.7$  Hz, 1H), 7.48 (s, 1H), 7.23 (d,  $J = 8.2$  Hz, 1H), 7.18 (d,  $J = 8.7$  Hz, 2H), 7.10 (s, 1H), 6.95 (s, 1H), 3.99 (s, 3H), 3.87 (s, 3H);  $^{13}\text{C}$  NMR (75 MHz,  $\text{CDCl}_3$ )  $\delta$  166.1, 159.5, 148.9, 142.0, 137.1, 136.2, 132.1, 130.8, 129.9, 129.6, 126.0, 125.8, 125.2, 123.7, 119.5, 55.4, 52.8; MS (ESI,  $m/z$ ): 381.4 ( $\text{M}+\text{H}$ ) $^+$ ; HRMS (ESI,  $m/z$ ) calcd for  $\text{C}_{19}\text{H}_{17}\text{N}_4\text{O}_5$  [ $\text{M}+\text{H}$ ] $^+$  381.1199, found 381.1195; IR( $\text{cm}^{-1}$ , neat): 3448, 3087, 2996, 2950, 1722.

### 3. Stepwise proton NMR monitoring of the synthesis of 6

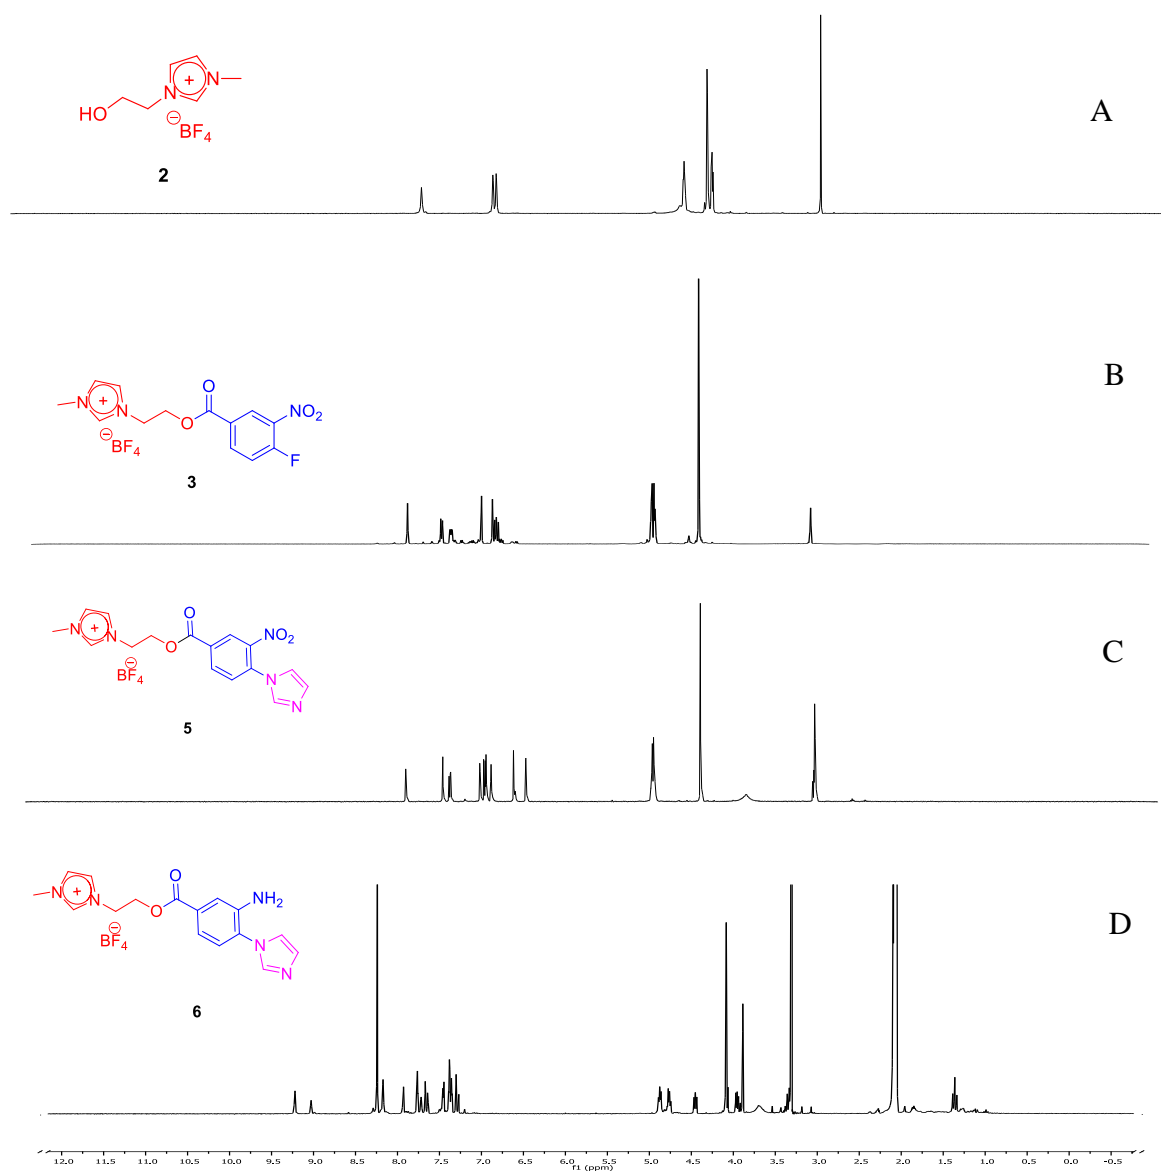

#### 4. Characterization Data for Compound 12b-12s

Methyl **5'*H*-spiro[cyclopentane-1,4'-imidazo[1,5-*a*]quinoxaline]-7'-carboxylate (12b)**

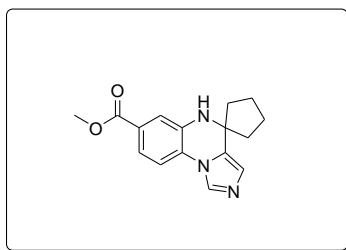

$^1\text{H}$  NMR (300 MHz, DMSO- $d_6$ )  $\delta$  8.40, (s, 1H), 7.77 (d,  $J = 7.9$  Hz, 1H), 7.57 (s, 1H), 7.32 (d,  $J = 7.9$  Hz, 1H), 6.89 (s, 1H), 6.58 (s, NH), 3.82 (s, 3H), 1.90-1.71 (m, 8H);  $^{13}\text{C}$  NMR (75 MHz, DMSO- $d_6$ )  $\delta$  166.8, 137.2, 133.2, 132.8, 127.9, 125.9, 122.5, 119.5, 117.2, 116.4, 61.1, 52.9, 40.2, 23.8; MS (ESI,  $m/z$ ): 284 ( $\text{M}+\text{H}$ ) $^+$ ; HRMS (ESI,  $m/z$ ) calcd for  $\text{C}_{16}\text{H}_{18}\text{N}_3\text{O}_2$  [ $\text{M}+\text{H}$ ] $^+$  284.1399, found 284.1402; IR ( $\text{cm}^{-1}$ , neat): 3365, 3093, 2927, 2859, 1704.

Methyl **5'*H*-spiro[cyclohexane-1,4'-imidazo[1,5-*a*]quinoxaline]-7'-carboxylate (12c)**

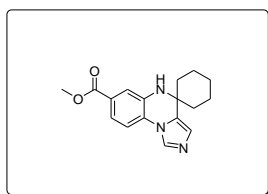

$^1\text{H}$  NMR (300 MHz, DMSO- $d_6$ )  $\delta$  8.39 (s, 1H), 7.77 (d,  $J = 8.2$  Hz, 1H), 7.76 (d,  $J = 1.8$  Hz, 1H), 7.33 (dd,  $J = 8.2, 1.8$  Hz, 1H), 6.93 (s, 1H), 6.59 (s, NH), 3.83 (s, 3H), 1.70-1.67 (m, 6H), 1.53-1.50 (m, 4H);  $^{13}\text{C}$  NMR (75 MHz, DMSO- $d_6$ )  $\delta$

166.2, 136.5, 133.8, 132.7, 128.0, 125.9, 123.0, 119.5, 117.7, 116.3, 52.9, 52.5, 37.0, 25.7, 21.3; MS (ESI,  $m/z$ ): 298 ( $M+H$ )<sup>+</sup>; HRMS (ESI,  $m/z$ ) calcd for C<sub>17</sub>H<sub>20</sub>N<sub>3</sub>O<sub>2</sub> [ $M+H$ ]<sup>+</sup> 298.1555, found 298.1558; IR (cm<sup>-1</sup>, neat): 3187, 2950, 2865, 1708.

**Methyl 4-ethyl-4,5-dihydro-4-methylimidazo[1,5-*a*]quinoxaline-7-Carboxylate (12d)**

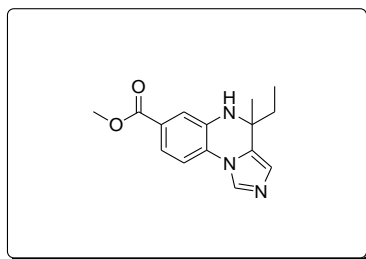

<sup>1</sup>H NMR (300 MHz, CDCl<sub>3</sub>) δ 8.02 (s, 1H), 7.56 (dd,  $J = 8.1, 1.8$  Hz, 1H), 7.52 (d,  $J = 1.8$  Hz, 1H), 7.50 (d,  $J = 8.1$  Hz, 1H), 6.91 (s, 1H), 3.98 (s, NH), 3.92 (s, 3H), 1.78 (m, 2H), 1.55 (s, 3H), 0.91 (t,  $J = 7.4$  Hz, 3H); <sup>13</sup>C NMR (75 MHz, CDCl<sub>3</sub>) δ 166.9, 135.9, 132.2, 131.4, 128.4, 125.5, 123.6, 120.5, 117.3, 115.2, 54.2, 52.6, 35.0, 26.8, 8.9; MS (ESI,  $m/z$ ): 272 ( $M+H$ )<sup>+</sup>; HRMS (ESI,  $m/z$ ) calcd for C<sub>15</sub>H<sub>18</sub>N<sub>3</sub>O<sub>2</sub> [ $M+H$ ]<sup>+</sup> 272.1399, found 272.1397; IR (cm<sup>-1</sup>, neat): 3222, 2971, 2994, 2921, 1704.

**Methyl 4,5-dihydro-4-methyl-4-propylimidazo[1,5-a]quinoxaline-7-Carboxylate (12e)**

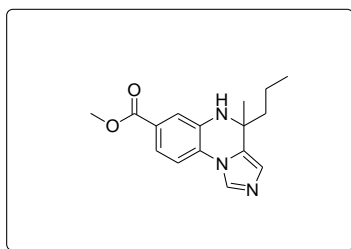

$^1\text{H}$  NMR (300 MHz,  $\text{CDCl}_3$ )  $\delta$  8.01 (s, 1H), 7.53 (dd,  $J = 8.2, 1.7$  Hz, 1H), 7.48 (d,  $J = 1.7$  Hz, 1H), 7.43 (d,  $J = 8.2$  Hz, 1H), 6.90 (s, 1H), 4.01 (s, NH), 3.92 (s, 3H), 1.74-1.66 (m, 2H), 1.56 (s, 3H), 1.29-1.10 (m, 2H), 0.86 (t,  $J = 7.3$  Hz, 3H);  $^{13}\text{C}$  NMR (75 MHz,  $\text{CDCl}_3$ )  $\delta$  166.9, 135.8, 132.3, 131.4, 128.5, 125.5, 123.6, 120.6, 117.2, 115.2, 53.9, 52.6, 44.9, 27.6, 17.9, 14.6; MS (ESI,  $m/z$ ): 286 ( $\text{M}+\text{H}$ ) $^+$ ; HRMS (ESI,  $m/z$ ) calcd for  $\text{C}_{16}\text{H}_{20}\text{N}_3\text{O}_2$  [ $\text{M}+\text{H}$ ] $^+$  286.1555, found 286.1557; IR ( $\text{cm}^{-1}$ , neat): 3349, 2952, 2931, 2865, 1708.

**Methyl 4,5-dihydro-4-methyl-4-pentylimidazo[1,5-a]quinoxaline-7-Carboxylate (12f)**

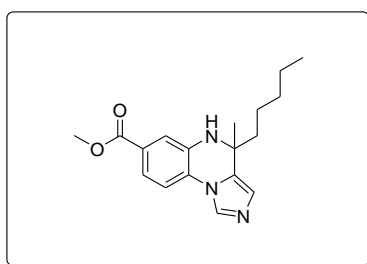

$^1\text{H}$  NMR (300 MHz,  $\text{CDCl}_3$ )  $\delta$  8.01 (s, 1H), 7.53 (dd,  $J = 8.2, 1.7$  Hz, 1H), 7.48 (d,  $J = 1.7$  Hz, 1H), 7.43 (d,  $J = 8.2$  Hz, 1H), 6.90 (s, 1H), 4.00 (s, NH), 3.92 (s, 3H), 1.75-1.67 (m, 2H), 1.55 (s, 3H), 1.36-1.17 (m, 6H), 0.84 (t,  $J = 6.9$  Hz, 3H);



$^{13}\text{C}$  NMR (75 MHz,  $\text{CDCl}_3$ )  $\delta$  166.9, 136.7, 132.4, 131.4, 128.5, 125.5, 123.5, 120.6, 117.3, 115.2, 53.9, 52.6, 42.4, 32.2, 27.5, 24.3, 22.9, 14.4; MS (ESI,  $m/z$ ): 314 ( $\text{M}+\text{H}$ ) $^+$ ; HRMS (ESI,  $m/z$ ) calcd for  $\text{C}_{18}\text{H}_{24}\text{N}_3\text{O}_2$  [ $\text{M}+\text{H}$ ] $^+$  314.1868, found 314.1865; IR( $\text{cm}^{-1}$ , neat): 3355, 2952, 2931, 2857, 1716.

**Methyl 4-methyl-5'*H*-spiro[cyclohexane-1,4'-imidazo[1,5-*a*]quinoxaline]-7'-carboxylate (12g)**

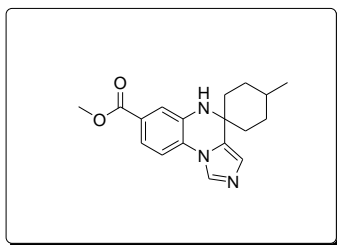

$^1\text{H}$  NMR (300 MHz,  $\text{CDCl}_3$ )  $\delta$  8.01 (s, 1H), 7.55 (d,  $J = 1.7$  Hz, 1H), 7.52 (dd,  $J = 7.4, 1.7$  Hz, 1H), 7.43 (d,  $J = 7.4$  Hz, 1H), 6.91 (s, 1H), 4.60 (s, NH), 3.92 (s, 3H), 2.05-2.00 (m, 2H), 1.81-1.70 (m, 4H), 1.53-1.48 (m, 1H), 1.29-1.15 (m, 2H), 1.00 (d,  $J = 6.5$  Hz, 3H);  $^{13}\text{C}$  NMR (75 MHz,  $\text{CDCl}_3$ )  $\delta$  166.8, 134.9, 134.3, 131.5, 128.5, 126.3, 122.6, 121.2, 117.8, 115.4, 52.6, 51.9, 35.9, 31.9, 30.1, 22.7; MS (ESI,  $m/z$ ): 312 ( $\text{M}+\text{H}$ ) $^+$ ; HRMS (ESI,  $m/z$ ) calcd for  $\text{C}_{18}\text{H}_{22}\text{N}_3\text{O}_2$  [ $\text{M}+\text{H}$ ] $^+$  312.1712, found 312.1713; IR ( $\text{cm}^{-1}$ , neat): 3363, 3089, 2937, 2913, 2863, 1704.

**Methyl 5'*H*-spiro[cycloheptane-1,4'-imidazo[1,5-*a*]quinoxaline]-7'-**

**carboxylate (12h)**

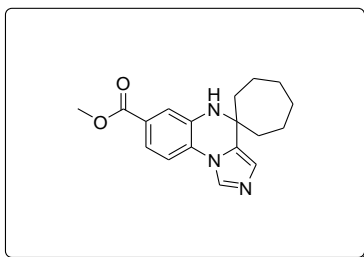

$^1\text{H}$  NMR (300 MHz,  $\text{CDCl}_3$ )  $\delta$  8.00 (s, 1H), 7.54 (dd,  $J = 8.1, 1.7$  Hz, 1H), 7.52 (d,  $J = 1.7$  Hz, 1H), 7.42 (d,  $J = 8.1$  Hz, 1H), 6.97 (s, 1H), 4.31 (s, NH), 3.92 (s, 3H), 2.12-2.04 (m, 2H), 1.96-1.88 (m, 2H), 1.66-1.53 (m, 8H);  $^{13}\text{C}$  NMR (75 MHz,  $\text{CDCl}_3$ )  $\delta$  166.9, 135.4, 134.7, 131.4, 128.5, 126.2, 122.9, 120.9, 117.8, 115.2, 56.7, 52.5, 40.7, 30.3, 22.8; MS (ESI,  $m/z$ ): 312 ( $\text{M}+\text{H}$ ) $^+$ ; HRMS (ESI,  $m/z$ ) calcd for  $\text{C}_{18}\text{H}_{22}\text{N}_3\text{O}_2$  [ $\text{M}+\text{H}$ ] $^+$  312.1712, found 312.1710; IR( $\text{cm}^{-1}$ , neat): 3349, 3330, 3093, 2931, 1704.

**Methyl 4,5-dihydro-4-methyl-4-phenylimidazo[1,5-a]quinoxaline-7-carboxylate (12i)**

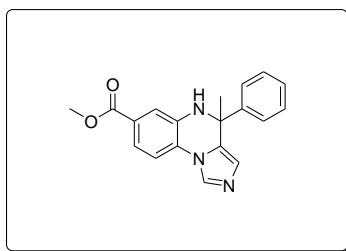

$^1\text{H}$  NMR (300 MHz,  $\text{CDCl}_3$ )  $\delta$  8.03 (s, 1H), 7.64 (d,  $J = 1.6$  Hz, 1H), 7.49 (dd,  $J = 8.3, 1.6$  Hz, H), 7.38 (d,  $J = 8.3$  Hz, 1H), 7.39-7.10 (m, 5H), 7.02 (s, 1H), 5.14 (s, NH), 3.88 (s, 3H), 1.93 (s, 3H);  $^{13}\text{C}$  NMR (75 MHz,  $\text{CDCl}_3$ )  $\delta$  166.9, 145.2, 135.7, 132.3, 131.9, 128.9, 128.6, 127.8, 126.2, 125.9, 124.6, 121.2,

117.8, 115.5, 56.7, 52.6, 29.6; MS (ESI,  $m/z$ ): 320 ( $M+H$ )<sup>+</sup>; HRMS (ESI,  $m/z$ ) calcd for C<sub>19</sub>H<sub>18</sub>N<sub>3</sub>O<sub>2</sub> [ $M+H$ ]<sup>+</sup> 320.1399, found 320.1397; IR(cm<sup>-1</sup>, neat): 3357, 2981, 2944, 1714.

**Methyl 3'-methyl-5'*H*-spiro[cyclopentane-1,4'-imidazo[1,5-*a*]quinoxaline]-7'-carboxylate (12j)**

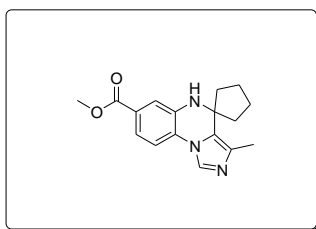

<sup>1</sup>H NMR (300 MHz, CDCl<sub>3</sub>) δ 7.95 (s, 1H), 7.55 (dd,  $J = 8.3, 1.7$  Hz, 1H), 7.46 (d,  $J = 1.7$  Hz, 1H), 7.41 (d,  $J = 8.3$  Hz, 1H), 4.10 (s, NH), 3.91 (s, 3H), 2.34 (s, 3H), 2.48-2.16 (m, 2H), 1.95-1.74 (m, 6H); <sup>13</sup>C NMR (75 MHz, CDCl<sub>3</sub>) δ 166.9, 135.3, 131.2, 129.7, 127.9, 127.0, 126.5, 121.0, 117.4, 115.0, 62.5, 52.6, 39.7, 24.2, 14.7; MS (ESI,  $m/z$ ): 298 ( $M+H$ )<sup>+</sup>; HRMS (ESI,  $m/z$ ) calcd for C<sub>17</sub>H<sub>20</sub>N<sub>3</sub>O<sub>2</sub> [ $M+H$ ]<sup>+</sup> 298.1555, found 298.1553; IR(cm<sup>-1</sup>, neat): 3291, 3124, 2950, 1702.

**Methyl 3'-methyl-5'*H*-spiro[cyclohexane-1,4'-imidazo[1,5-*a*]quinoxaline]-7'-carboxylate (12k)**

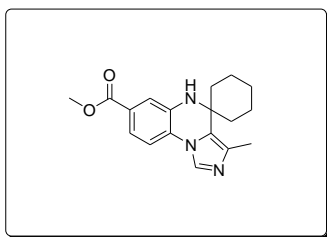

$^1\text{H}$  NMR (300 MHz,  $\text{CDCl}_3$ )  $\delta$  7.92 (s, 1H), 7.53-7.50 (m, 2H), 7.38 (d,  $J = 8.8$  Hz, 1H), 4.66 (s, NH), 3.91 (s, 3H), 2.39 (s, 3H), 1.94-1.72 (m, 8H), 1.58-1.21 (m, 2H);  $^{13}\text{C}$  NMR (75 MHz,  $\text{CDCl}_3$ )  $\delta$  166.9, 134.6, 131.5, 129.4, 128.1, 127.8, 126.3, 120.9, 117.5, 114.9, 53.6, 52.6, 35.2, 25.3, 21.3, 15.5; MS (ESI,  $m/z$ ): 312 ( $\text{M}+\text{H}$ ) $^+$ ; HRMS (ESI,  $m/z$ ) calcd for  $\text{C}_{18}\text{H}_{22}\text{N}_3\text{O}_2$  [ $\text{M}+\text{H}$ ] $^+$  312.1712, found 312.1710; IR( $\text{cm}^{-1}$ , neat): 3372, 3116, 2919, 2850, 1706.

**Methyl 3',4'-dimethyl-5'*H*-spiro[cyclohexane-1,4'-imidazo[1,5-*a*]quinoxaline]-7'-carboxylate (12l)**

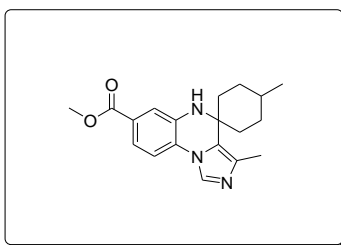

$^1\text{H}$  NMR (300 MHz,  $\text{CDCl}_3$ )  $\delta$  7.90 (s, 1H), 7.51 (d,  $J = 1.4$  Hz, 1H), 7.48 (dd,  $J = 8.3, 1.4$  Hz, 1H), 7.36 (d,  $J = 8.3$  Hz, 1H), 4.66 (s, NH), 3.88 (s, 3H), 2.36 (s, 3H), 1.93-1.84 (m, 3H), 1.70-1.66 (m, 2H), 1.49-1.43 (m, 1H), 1.27-1.03 (m, 3H), 0.98 (d,  $J = 7.4$  Hz, 3H);  $^{13}\text{C}$  NMR (75 MHz,  $\text{CDCl}_3$ )  $\delta$  166.9, 134.6, 131.5, 129.5, 128.1, 127.5, 126.4, 120.9, 117.5, 114.9, 53.1, 52.5, 35.2, 32.1, 30.0, 22.7, 15.5; MS (ESI,  $m/z$ ): 326 ( $\text{M}+\text{H}$ ) $^+$ ; HRMS (ESI,  $m/z$ ) calcd for  $\text{C}_{19}\text{H}_{24}\text{N}_3\text{O}_2$

[M+H]<sup>+</sup> 326.1868, found 326.1869; IR(cm<sup>-1</sup>, neat): 3363, 3093, 2915, 2859, 1702.

**Methyl 4-ethyl-3'-methyl-5'*H*-spiro[cyclohexane-1,4'-imidazo[1,5-*a*]-quinoxaline]-7'-carboxylate (12m)**

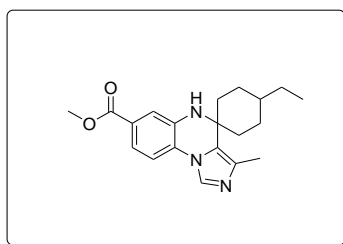

<sup>1</sup>H NMR (300 MHz, CDCl<sub>3</sub>) δ 7.93 (s, 1H), 7.52 (d, *J* = 1.6 Hz, 1H), 7.51 (dd, *J* = 8.7, 1.6 Hz, 1H), 7.39 (d, *J* = 8.7 Hz, 1H), 4.60 (s, NH), 3.92 (s, 3H), 2.38 (s, 3H), 2.01-1.65 (m, 8H), 1.39-1.09 (m, 3H), 0.95 (t, *J* = 7.2 Hz, 3H); <sup>13</sup>C NMR (75 MHz, CDCl<sub>3</sub>) δ 166.9, 134.6, 131.5, 129.5, 128.1, 127.6, 126.4, 120.9, 117.5, 114.9, 53.6, 52.5, 38.7, 35.2, 30.1, 27.7, 15.4, 11.8; MS (ESI, *m/z*): 340 (M+H)<sup>+</sup>; HRMS (ESI, *m/z*) calcd for C<sub>20</sub>H<sub>26</sub>N<sub>3</sub>O<sub>2</sub> [M+H]<sup>+</sup> 340.2025, found 340.2024; IR (cm<sup>-1</sup>, neat): 3305, 3118, 2948, 2856, 1704.

**Methyl 1'-methyl-5'*H*-spiro[cyclopentane-1,4'-imidazo[1,5-*a*]quinoxaline]-7'-carboxylate (12n)**

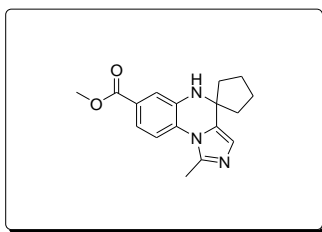

$^1\text{H}$  NMR (300 MHz, DMSO- $d_6$ )  $\delta$  7.65 (d,  $J$  = 8.4 Hz, 1H), 7.62 (d,  $J$  = 1.7 Hz, 1H), 7.37 (dd,  $J$  = 8.4, 1.7 Hz, 1H), 6.69 (s, 1H), 6.50 (s, NH), 3.83 (s, 3H), 2.50 (s, 3H), 1.87-1.66 (m, 8H);  $^{13}\text{C}$  NMR (75 MHz, DMSO- $d_6$ )  $\delta$  166.8, 142.5, 138.9, 135.2, 127.9, 127.5, 119.8, 119.7, 118.2, 117.5, 61.2, 52.9, 39.1, 23.7, 15.0; MS (ESI,  $m/z$ ): 298 ( $\text{M}+\text{H}$ ) $^+$ ; HRMS (ESI,  $m/z$ ) calcd for  $\text{C}_{17}\text{H}_{20}\text{N}_3\text{O}_2$  [ $\text{M}+\text{H}$ ] $^+$  298.1555, found 298.1556; IR( $\text{cm}^{-1}$ , neat): 3345, 2950, 2871, 1718.

**Methyl 1'-methyl-5'*H*-spiro[cyclohexane-1,4'-imidazo[1,5-*a*]quinoxaline]-7'-carboxylate (12o)**

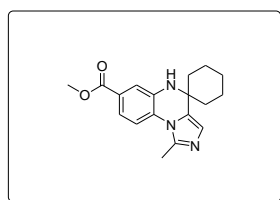

$^1\text{H}$  NMR (300 MHz,  $\text{CDCl}_3$ )  $\delta$  7.55 (s, 1H), 7.51-7.46 (m, 2H), 6.75 (s, 1H), 4.65 (s, NH), 3.86 (s, 3H), 2.68 (s, 3H), 1.76-1.67 (m, 2H), 1.60-1.34 (m, 8H);  $^{13}\text{C}$  NMR (75 MHz,  $\text{CDCl}_3$ )  $\delta$  166.9, 142.6, 136.6, 135.6, 128.3, 127.9, 121.0, 120.2, 118.0, 117.5, 52.6, 52.6, 35.8, 25.4, 21.9, 17.7; MS (ESI,  $m/z$ ): 312 ( $\text{M}+\text{H}$ ) $^+$ ; HRMS (ESI,  $m/z$ ) calcd for  $\text{C}_{18}\text{H}_{22}\text{N}_3\text{O}_2$  [ $\text{M}+\text{H}$ ] $^+$  312.1712, found 312.1709; IR( $\text{cm}^{-1}$ , neat): 3369, 2929, 2852, 1716.

**Methyl 1-ethyl-3,4-dimethyl-4-pentyl-4,5-dihydroimidazo[1,5-*a*]-quinoxalin**

**e-7-carboxylate (12p)**

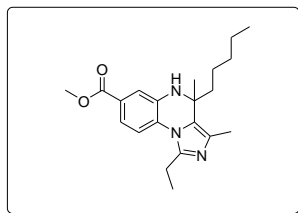

<sup>1</sup>H NMR (300 MHz, CDCl<sub>3</sub>)  $\delta$  7.53 (dd,  $J = 8.7, 1.6$  Hz, 1H), 7.47 (d,  $J = 1.5$  Hz, 1H), 7.46 (d,  $J = 8.7$  Hz, 1H), 3.83 (s, 3H), 3.02 (q,  $J = 7.4$  Hz, 2H), 2.30 (s, 3H), 1.55 (s, 3H), 1.42 (t,  $J = 7.4$  Hz, 3H), 1.32-1.16 (m, 8H), 0.82 (t,  $J = 6.8$  Hz, 3H); <sup>13</sup>C NMR (75 MHz, CDCl<sub>3</sub>)  $\delta$  167.0, 145.9, 136.9, 129.0, 127.9, 127.8, 127.6, 120.8, 117.5, 117.4, 55.1, 52.6, 41.2, 32.3, 26.9, 24.2, 24.2, 22.9, 14.8, 14.4, 12.4; MS (ESI,  $m/z$ ): 356 (M+H)<sup>+</sup>; HRMS (ESI,  $m/z$ ) calcd for C<sub>21</sub>H<sub>30</sub>N<sub>3</sub>O<sub>2</sub> [M+H]<sup>+</sup> 356.2338, found 356.2340; IR(cm<sup>-1</sup>, neat): 3349, 2954, 2931, 2857, 1720.

**Methyl 1'-ethyl-3'-methyl-5'*H*-spiro[cyclopentane-1,4'-imidazo[1,5-*a*]-quinoxaline]-7'-carboxylate (12q)**

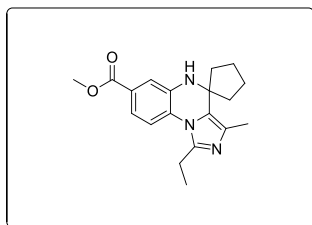

<sup>1</sup>H NMR (300 MHz, CDCl<sub>3</sub>)  $\delta$  7.55 (dd,  $J = 8.4, 1.8$  Hz, 1H), 7.49 (d,  $J = 1.8$  Hz, 1H), 7.46 (d,  $J = 8.4$  Hz, 1H), 4.12 (s, NH), 3.90(s, 3H), 3.02 (q,  $J = 7.4$  Hz, 2H), 2.31 (s, 3H), 2.19-2.15 (m, 2H), 1.83-1.80 (m, 6H), 1.41 (t,  $J = 7.4$  Hz, 3H); <sup>13</sup>C

NMR (75 MHz, CDCl<sub>3</sub>)  $\delta$  166.9, 145.9, 137.3, 128.9, 128.7, 128.0, 127.5, 121.3, 121.3, 117.8, 117.7, 62.9, 52.6, 38.6, 24.0, 14.6, 12.5; MS (ESI,  $m/z$ ): 326 (M+H)<sup>+</sup>; HRMS (ESI,  $m/z$ ) calcd for C<sub>19</sub>H<sub>24</sub>N<sub>3</sub>O<sub>2</sub> [M+H]<sup>+</sup> 326.1868, found 326.1870; IR(cm<sup>-1</sup>, neat): 3351, 2950, 2871, 1718.

**Methyl 1'-ethyl-3'-methyl-5'*H*-spiro[cyclohexane-1,4'-imidazo[1,5-*a*]-quinoxaline]-7'-carboxylate (12r)**

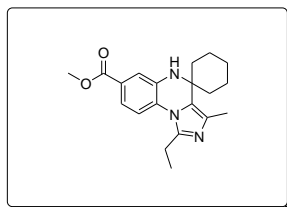

<sup>1</sup>H NMR (300 MHz, CDCl<sub>3</sub>)  $\delta$  7.53-7.50 (m, 2H), 7.41 (d,  $J$  = 8.2 Hz, 1H), 4.67 (s, NH), 3.87 (s, 3H), 2.97 (q,  $J$  = 7.4 Hz, 2H), 2.32 (s, 3H), 2.01-1.68 (m, 10H), 1.37 (t,  $J$  = 7.4 Hz, 3H); <sup>13</sup>C NMR (75 MHz, CDCl<sub>3</sub>)  $\delta$  166.9, 145.6, 136.3, 129.6, 128.6, 128.2, 127.6, 121.2, 117.8, 117.6, 53.7, 52.5, 34.3, 25.3, 23.9, 21.3, 14.6, 12.5; MS (ESI,  $m/z$ ): 340 (M+H)<sup>+</sup>; HRMS (ESI,  $m/z$ ) calcd for C<sub>20</sub>H<sub>26</sub>N<sub>3</sub>O<sub>2</sub> [M+H]<sup>+</sup> 340.2025, found 340.2026; IR(cm<sup>-1</sup>, neat): 3378, 2927, 2856, 1718.

**1-Ethyl-3,4-dimethyl-4-phenyl-4,5-dihydroimidazo[1,5-*a*]quinoxalin-7-yl acetate (12s)**



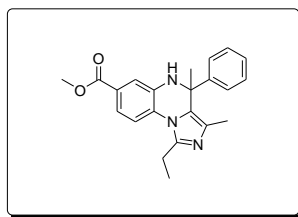

$^1\text{H}$  NMR (300 MHz,  $\text{CDCl}_3$ )  $\delta$  7.54-7.50 (m, 2H), 7.45 (d,  $J = 8.8$  Hz, 1H), 7.39-7.36 (m, 2H), 7.32-7.21 (m, 3H), 4.52 (s, NH), 3.89 (s, 3H), 3.04 (q,  $J = 7.4$  Hz, 2H), 1.99 (s, 3H), 1.88 (s, 3H), 1.45 (t,  $J = 7.4$  Hz, 3H);  $^{13}\text{C}$  NMR (75 MHz,  $\text{CDCl}_3$ )  $\delta$  166.9, 146.0, 144.8, 136.9, 129.9, 128.8, 128.5, 128.1, 127.8, 126.8, 126.8, 121.2, 117.8, 117.8, 57.7, 52.6, 28.2, 24.0, 14.0, 12.4; MS (ESI,  $m/z$ ): 362 ( $\text{M}+\text{H}$ ) $^+$ ; HRMS (ESI,  $m/z$ ) calcd for  $\text{C}_{22}\text{H}_{24}\text{N}_3\text{O}_2$  [ $\text{M}+\text{H}$ ] $^+$  362.1868, found 362.1866; IR( $\text{cm}^{-1}$ , neat): 3372, 2977, 2933, 1718.

## 5. Characterization Data for Compound 13b-i

**(Z)-methyl 4-(1H-imidazol-1-yl)-3-((methoxy (naphthalen-2-yl) methylene) amino)benzoate (13b)**

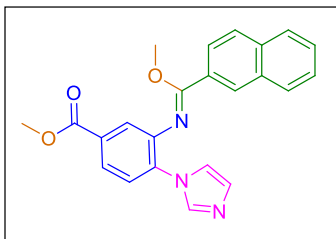

Yellow oil;  $^1\text{H}$  NMR (300 MHz, Acetone- $d_6$ )  $\delta$  7.83 (dd,  $J = 8.3, 1.7$ , Hz, 2H), 7.77 (s, 1H), 7.75 – 7.69 (m, 3H), 7.60 – 7.49 (m, 3H), 7.46 (d,  $J = 8.3$  Hz, 1H), 7.33 (s, 1H), 7.20 (dd,  $J = 8.5, 1.7$  Hz, 1H), 7.08 (s, 1H), 4.04 (s, 1H), 3.79 (s, 1H);  $^{13}\text{C}$  NMR (75 MHz, Acetone- $d_6$ )  $\delta$  165.4, 161.2, 142.7, 137.0, 133.8, 132.8, 132.4, 129.8, 129.1, 128.6, 127.9, 127.8, 127.7, 127.6, 126.7, 125.3, 124.6, 124.4, 119.5, 54.2, 51.6; MS (ESI,  $m/z$ ): 386.3 ( $\text{M}+\text{H}$ ) $^+$ ; HRMS (ESI,  $m/z$ ) calcd for  $\text{C}_{23}\text{H}_{20}\text{N}_3\text{O}_3$  [ $\text{M}+\text{H}$ ] $^+$  386.1505, found 386.1500.

**(Z)-methyl 4-(1H-imidazol-1-yl)-3-((methoxy (phenyl) methylene) amino) benzoate (13c)**

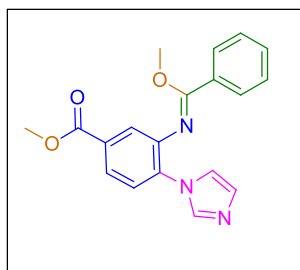

Yellow solid; 159-161 °C; <sup>1</sup>H NMR (300 MHz, Acetone-d<sub>6</sub>) δ 7.74 (dd, J= 8.4, 1.7 Hz, 1H), 7.66 (s, 1H), 7.49 – 7.44 (m, 2H), 7.41 – 7.33 (m, 1H), 7.33 – 7.22 (m, 3H), 7.18 – 7.10 (m, 2H), 7.05 (s, 1H), 3.99 (s, 3H), 3.85 (s, 3H); <sup>13</sup>C NMR (75 MHz, Acetone-d<sub>6</sub>) δ 165.4, 161.2, 142.7, 136.9, 132.6, 130.4, 129.9, 129.0, 128.9, 128.2, 128.1, 127.1, 125.3, 124.5, 124.4, 119.5, 54.0, 51.6; MS (ESI, *m/z*): 336.2 (M+H)<sup>+</sup>; HRMS (ESI, *m/z*) calcd for C<sub>19</sub>H<sub>18</sub>N<sub>3</sub>O<sub>3</sub> [M+H]<sup>+</sup> 386.1348, found 386.1344.

**(Z)-methyl 3-(((2-fluorophenyl) (methoxy) methylene) amino)-4-(1H-imidazol-1-yl)benzoate (13d)**

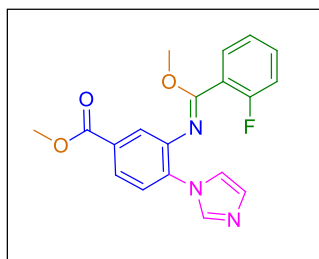

Brown oil; <sup>1</sup>H NMR (300 MHz, Acetone-d<sub>6</sub>) δ 7.82 (s, 1H), 7.73 (dd, *J* = 8.3, 1.9 Hz, 1H), 7.51 – 7.38 (m, 3H), 7.36 (d, *J* = 1.8 Hz, 1H), 7.23 – 7.13 (m, 2H), 7.11 (s, 1H), 7.01 (t, *J* = 8.5 Hz, 1H), 4.01 (s, 3H), 3.82 (s, 3H); <sup>13</sup>C NMR (75 MHz, Acetone-d<sub>6</sub>) δ 165.3, 160.0, 158.7, 156.7, 141.5, 137.2, 133.4, 132.6, 132.4, 130.0, 129.3, 129.0, 125.1, 124.9, 124.5, 123.7, 119.7, 119.6, 115.7, 115.5, 54.4, 51.5; MS (ESI, *m/z*): 354.2 (M+H)<sup>+</sup>; HRMS (ESI, *m/z*) calcd for C<sub>19</sub>H<sub>17</sub>FN<sub>3</sub>O<sub>3</sub> [M+H]<sup>+</sup> 354.1254, found 354.1252.

**(Z)-methyl 3-(((4-bromophenyl)(methoxy) methylene) amino)-4-(1H-imidazol-1-yl)benzoate (13e)**

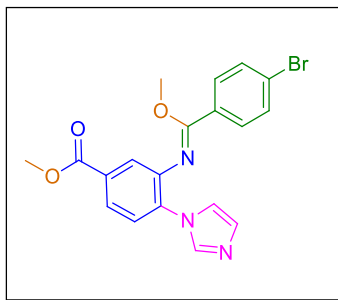

Yellow solid; 114-116 °C;  $^1\text{H}$  NMR (300 MHz, MeOD)  $\delta$  7.79 (dd,  $J = 8.3, 1.9$  Hz, 1H), 7.63 (s, 1H), 7.57 (d,  $J = 1.8$  Hz, 1H), 7.44 – 7.36 (m, 3H), 7.26 – 7.21 (m, 1H), 7.10 – 7.06 (m, 1H), 7.01 – 6.93 (m, 2H), 3.97 (s, 3H), 3.90 (s, 3H);  $^{13}\text{C}$  NMR (75 MHz, MeOD)  $\delta$  165.92, 160.59, 142.58, 137.02, 131.85, 131.23, 130.45, 129.69, 129.14, 127.86, 125.58, 124.75, 124.57, 119.87, 53.86, 51.50; MS (ESI,  $m/z$ ): 414 ( $\text{M}+\text{H}$ ) $^+$ ; HRMS (ESI,  $m/z$ ) calcd for  $\text{C}_{19}\text{H}_{17}\text{BrN}_3\text{O}_3$  [ $\text{M}+\text{H}$ ] $^+$  414.0453, found 414.0450.

**(Z)-methyl 4-(1H-imidazol-1-yl)-3-((methoxy (thiophen-2-yl) methylene) amino)benzoate (13f)**

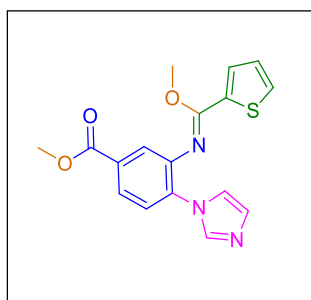

Yellow oil;  $^1\text{H}$  NMR (300 MHz, Acetone- $d_6$ )  $\delta$  7.90 (dd,  $J = 8.3, 2.0$  Hz, 1H), 7.68 (s, 1H), 7.66 – 7.58 (m, 3H), 7.26 (s, 1H), 7.10 (dd,  $J = 3.8, 1.2$  Hz, 1H), 7.04 – 6.95 (m, 2H), 3.94 (s, 3H), 3.89 (s, 3H);  $^{13}\text{C}$  NMR (75 MHz, Acetone- $d_6$ )  $\delta$  165.4, 154.0, 142.8, 136.9, 132.6, 131.9, 131.2, 130.7, 130.5, 129.0, 127.2, 126.0, 125.1, 123.9, 119.6, 53.9, 51.7; MS (ESI,  $m/z$ ): 342.2 ( $\text{M}+\text{H}$ ) $^+$ ; HRMS (ESI,  $m/z$ ) calcd for  $\text{C}_{17}\text{H}_{16}\text{N}_3\text{O}_3\text{S}$  [ $\text{M}+\text{H}$ ] $^+$  342.0912, found 342.0906.

**(Z)-methyl 4-(1H-imidazol-1-yl)-3-((methoxy (5-methylthiophen-2-yl)methylene) amino)benzoate (13g)**

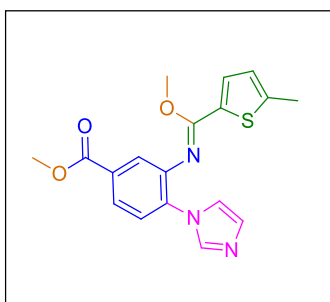

Pale yellow solid; 119-121  $^{\circ}\text{C}$ ;  $^1\text{H}$  NMR (300 MHz, Acetone- $d_6$ )  $\delta$  7.89 (dd,  $J = 8.2, 1.9$  Hz, 1H), 7.70 (s, 1H), 7.65 – 7.57 (m, 2H), 7.27 (s, 1H), 7.01 (s, 1H), 6.92 (d,  $J = 3.8$  Hz, 1H), 6.70 – 6.64 (m, 1H), 3.91 (s, 3H), 3.90 (s, 3H), 2.39 (s, 3H);  $^{13}\text{C}$  NMR (75 MHz, Acetone- $d_6$ )  $\delta$  165.4, 154.0, 146.2, 142.9, 137.0, 132.6, 132.4, 130.5, 128.9, 128.2, 126.0, 125.8, 125.0, 123.9, 119.6, 53.7, 51.7, 14.2; MS (ESI,  $m/z$ ): 356.1 ( $\text{M}+\text{H}$ ) $^+$ ; HRMS (ESI,  $m/z$ ) calcd for  $\text{C}_{18}\text{H}_{18}\text{N}_3\text{O}_3\text{S}$  [ $\text{M}+\text{H}$ ] $^+$  356.1069, found 356.1068.

**(Z)-methyl 3-((furan-2-yl(methoxy)methylene)amino)-4-(1H-imidazol-1-yl)benzoate (13h)**

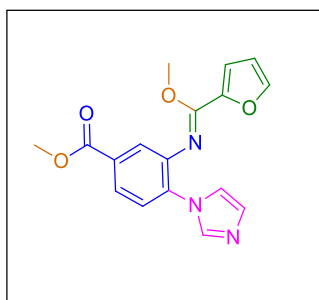

Brown solid; 89-91 °C;  $^1\text{H}$  NMR (300 MHz, Acetone- $\text{d}_6$ )  $\delta$  7.85 (dd,  $J = 8.2, 1.9$  Hz, 1H), 7.67 (s, 1H), 7.62 – 7.51 (m, 3H), 7.24 (d,  $J = 1.0$  Hz, 1H), 7.00 (s, 1H), 6.54 (dd,  $J = 3.6, 0.7$  Hz, 1H), 6.46 (dd,  $J = 3.5, 1.8$  Hz, 1H), 3.91 (s, 3H), 3.89 (s, 3H);  $^{13}\text{C}$  NMR (75 MHz, Acetone- $\text{d}_6$ )  $\delta$  165.5, 150.7, 145.6, 143.5, 143.0, 137.0, 132.4, 130.2, 128.9, 125.7, 124.6, 123.3, 119.6, 116.3, 111.5, 53.5, 51.6; MS (ESI,  $m/z$ ): 326.1 ( $\text{M}+\text{H}$ ) $^+$ ; HRMS (ESI,  $m/z$ ) calcd for  $\text{C}_{17}\text{H}_{16}\text{N}_3\text{O}_4$  [ $\text{M}+\text{H}$ ] $^+$  326.1141, found 326.1133.

**(Z)-methyl 3-((methoxy(4-nitrophenyl)methylene)amino)-4-(2-methyl-1H-imidazol-1-yl)benzoate (13i)**

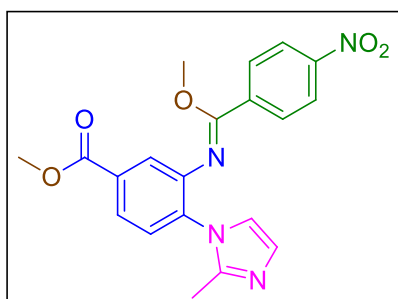

Yellow solid; 163-165 °C;  $^1\text{H}$  NMR (300 MHz, Acetone- $\text{d}_6$ )  $\delta$  8.17 (s, 1H), 8.15 (s, 1H), 7.78 (dd,  $J = 8.2, 1.9$  Hz, 1H), 7.68 (d,  $J = 1.9$  Hz, 1H), 7.43-7.36 (m,

3H), 6.85 (dd,  $J = 7.4, 1.4$  Hz, 2H), 3.96 (s, 3H), 3.89 (s, 3H), 1.94 (s, 3H);  $^{13}\text{C}$  NMR (75 MHz, Acetone- $\text{d}_6$ )  $\delta$  165.4, 158.6, 148.8, 144.2, 143.7, 136.2, 132.4, 131.0, 129.8, 128.1, 127.6, 124.7, 124.2, 123.3, 120.1, 54.3, 51.7, 12.4; MS (ESI,  $m/z$ ): 395.3 ( $\text{M}+\text{H}$ ) $^+$ ; HRMS (ESI,  $m/z$ ) calcd for  $\text{C}_{20}\text{H}_{19}\text{N}_4\text{O}_5$  [ $\text{M}+\text{H}$ ] $^+$  395.1355, found 395.1349.

## 6. Characteristic Data for Compound 14b-c

### Methyl 4-hexyl-1-methylimidazo[1,5-a]quinoxaline-7-carboxylate (14a)

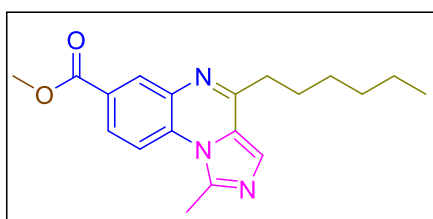

Off white solid; 81-83 °C;  $^1\text{H}$  NMR (400 MHz, acetone)  $\delta$  8.40 (d,  $J = 2.0$  Hz, 1H), 8.36 (d,  $J = 8.7$  Hz, 1H), 8.09 (dd,  $J = 8.7, 2.1$  Hz, 1H), 7.80 (s, 1H), 3.95 (s, 3H), 3.06 (s, 3H), 3.01 – 2.96 (m, 2H), 1.90 (dt,  $J = 15.3, 7.5$  Hz, 2H), 1.52 – 1.42 (m, 2H), 1.41-1.32 (m, 4H), 0.89 (t,  $J = 7.1$  Hz, 3H);  $^{13}\text{C}$  NMR (101 MHz, acetone- $d_6$ )  $\delta$  165.5, 158.1, 136.8, 130.3, 127.4, 125.1, 116.2, 51.6, 34.5, 31.5, 27.1, 22.3, 17.7, 13.4; MS (ESI,  $m/z$ ): 326.2 ( $\text{M}+\text{H}$ ) $^+$ ; HRMS (ESI,  $m/z$ ) calcd for  $\text{C}_{19}\text{H}_{24}\text{N}_3\text{O}_2$  [ $\text{M}+\text{H}$ ] $^+$  326.1869, found 326.1863.

**Methyl 4-cyclohexylimidazo[1,5-a]quinoxaline-7-carboxylate (14b)**

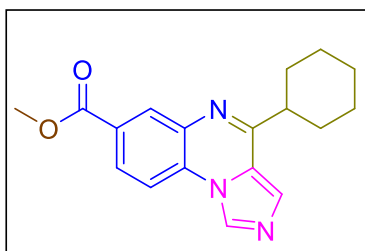

Off-white solid; 171-173 °C;  $^1\text{H}$  NMR (400 MHz, acetone- $d_6$ )  $\delta$  9.11 (s, 1H), 8.47 (d,  $J = 1.7$  Hz, 1H), 8.36 (d,  $J = 8.4$  Hz, 1H), 8.14 (dd,  $J = 8.6, 1.9$  Hz, 1H), 8.00 (s, 1H), 3.96 (s, 3H), 3.22 (tt,  $J = 11.5, 3.5$  Hz, 1H), 1.98 – 1.86 (m, 3H), 1.85 – 1.75 (m, 3H), 1.61 – 1.47 (m, 3H), 1.42 – 1.31 (m, 1H);  $^{13}\text{C}$  NMR (101 MHz, acetone- $d_6$ )  $\delta$  165.2, 161.7, 135.8, 130.7, 128.3, 128.0, 126.5, 115.1, 51.7, 43.2, 31.0, 25.9, 25.9; MS (ESI,  $m/z$ ): 310.3 ( $\text{M}+\text{H}$ ) $^+$ ; HRMS (ESI,  $m/z$ ) calcd for  $\text{C}_{18}\text{H}_{20}\text{N}_3\text{O}_2$  [ $\text{M}+\text{H}$ ] $^+$  310.1556, found 310.1551.



**Methyl 4-hexylimidazo[1,5-a]quinoxaline-7-carboxylate (14c)**

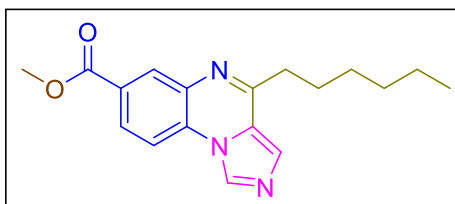

Off-white solid; 175-177 °C;  $^1\text{H}$  NMR (400 MHz, acetone- $d_6$ )  $\delta$  9.12 (s, 1H), 8.47 (d,  $J = 1.9$  Hz, 1H), 8.38 (d,  $J = 8.5$  Hz, 1H), 8.16 (dd,  $J = 8.5, 1.9$  Hz, 1H), 7.97 (s, 1H), 3.96 (s, 3H), 3.11 – 3.03 (m, 2H), 1.93 (dt,  $J = 15.3, 7.5$  Hz, 2H), 1.54 – 1.44 (m, 2H), 1.41 – 1.30 (m, 4H), 0.89 (t,  $J = 7.1$  Hz, 3H); MS (ESI,  $m/z$ ): 312.3 ( $\text{M}+\text{H}$ ) $^+$ ; HRMS (ESI,  $m/z$ ) calcd for  $\text{C}_{18}\text{H}_{22}\text{N}_3\text{O}_2$  [ $\text{M}+\text{H}$ ] $^+$  312.1712, found 312.1706.

7.  $^1\text{H}$  NMR,  $^{13}\text{C}$  NMR, LRMS, HRMS and IR spectra of Compound 12a-s

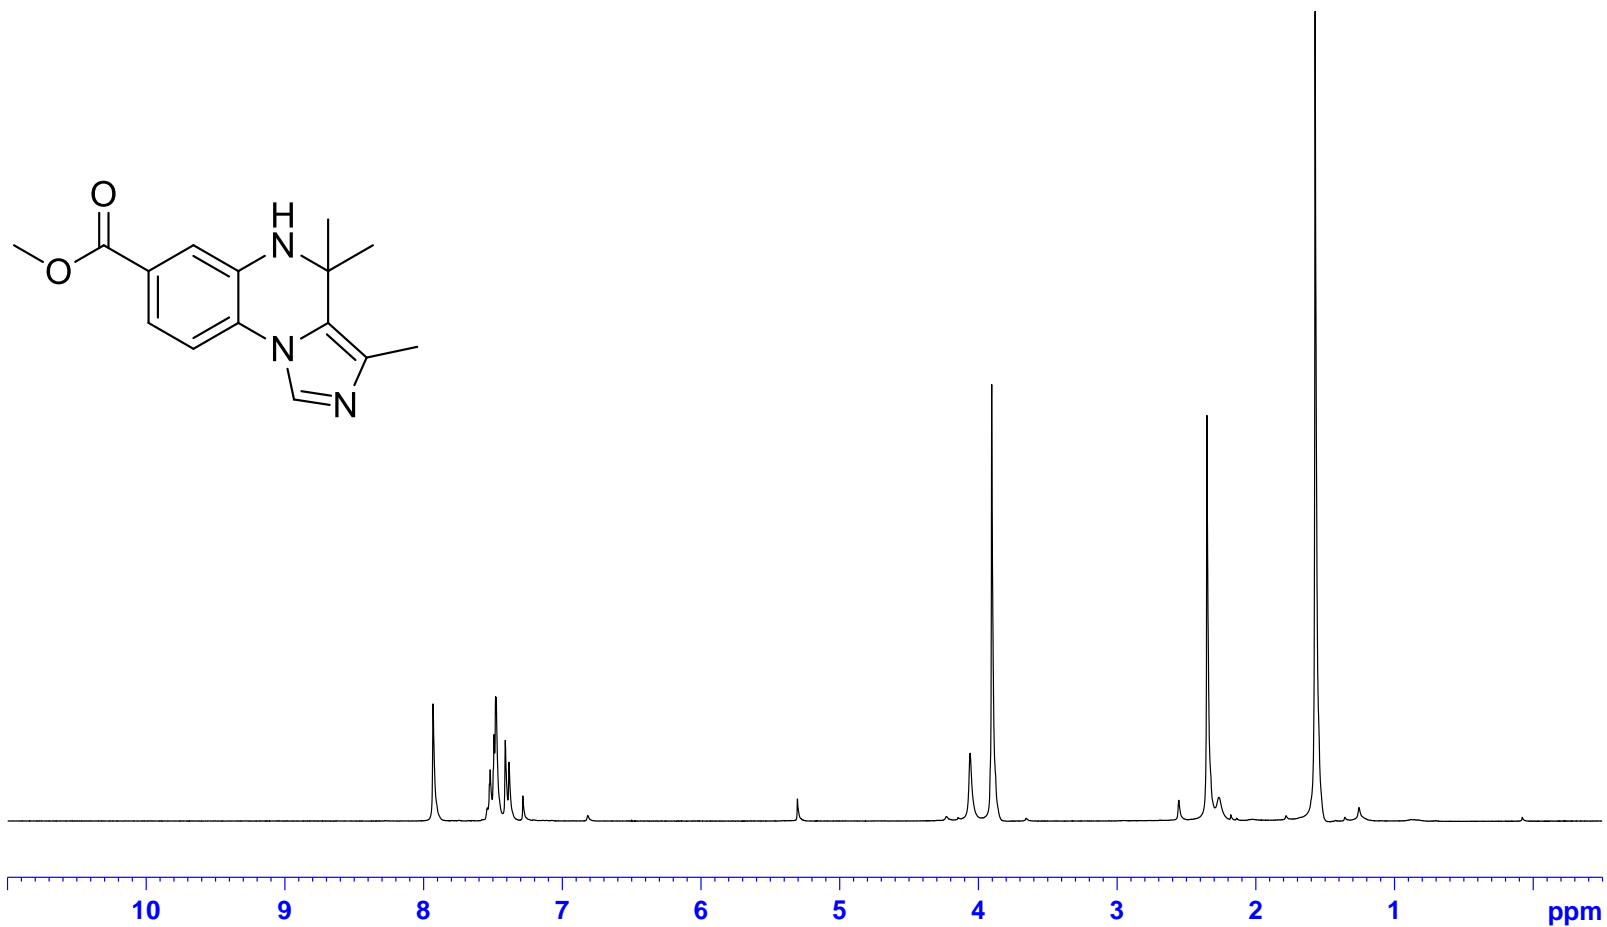

$^1\text{H}$  NMR spectrum (300 MHz) of compound **12a** in  $\text{CDCl}_3$

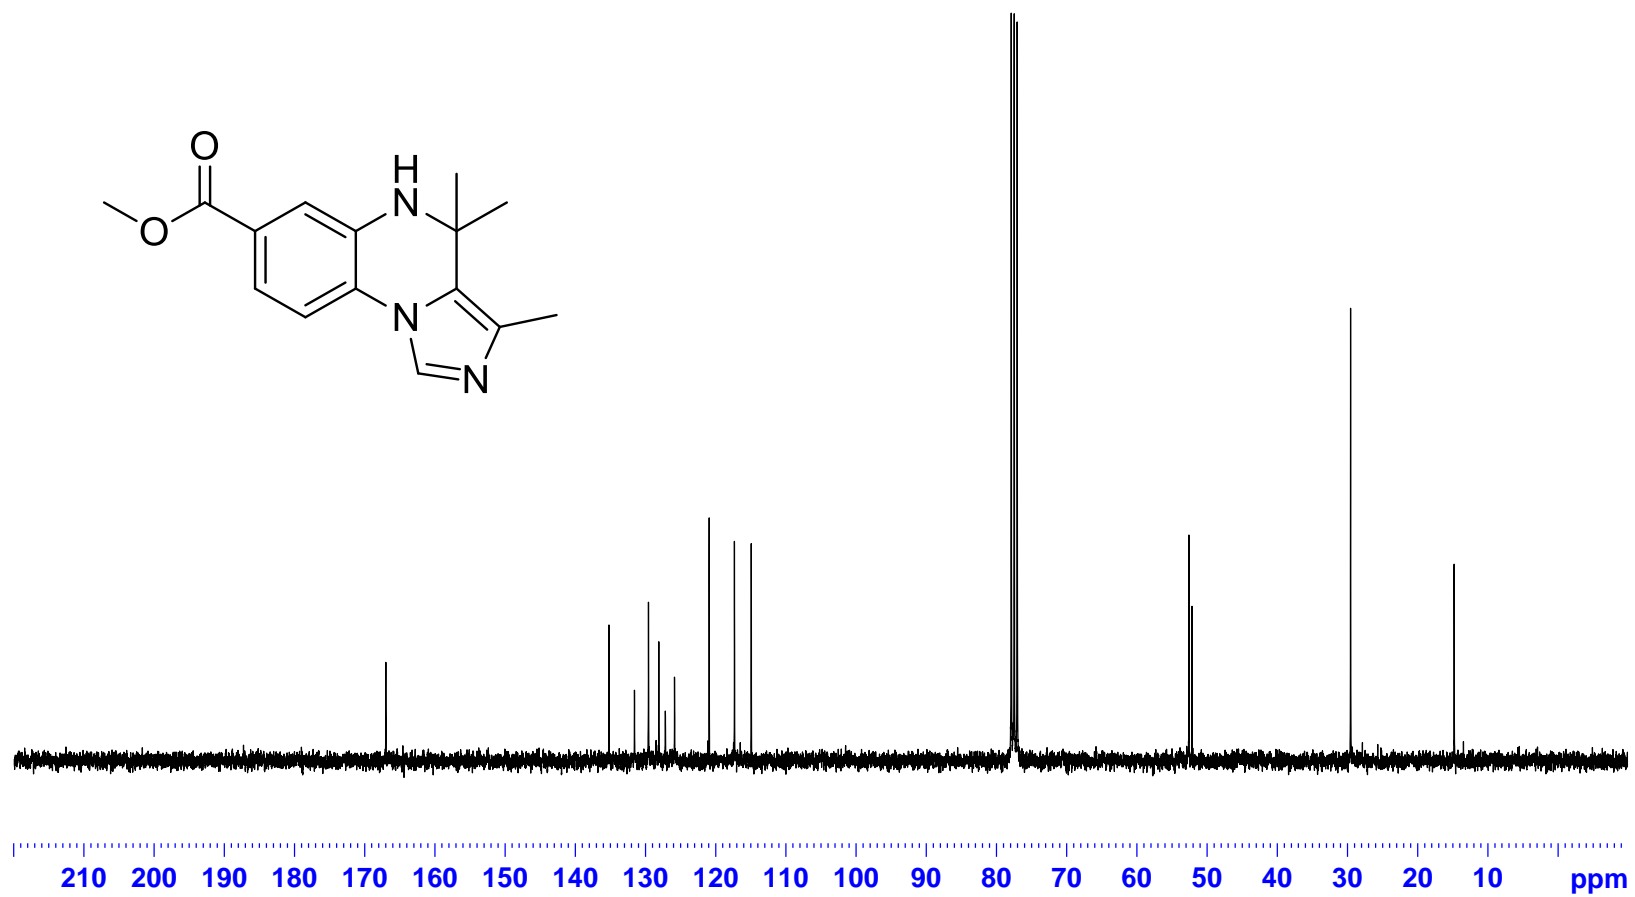

$^{13}\text{C}$  NMR spectrum (75 MHz) of compound **12a** in  $\text{CDCl}_3$

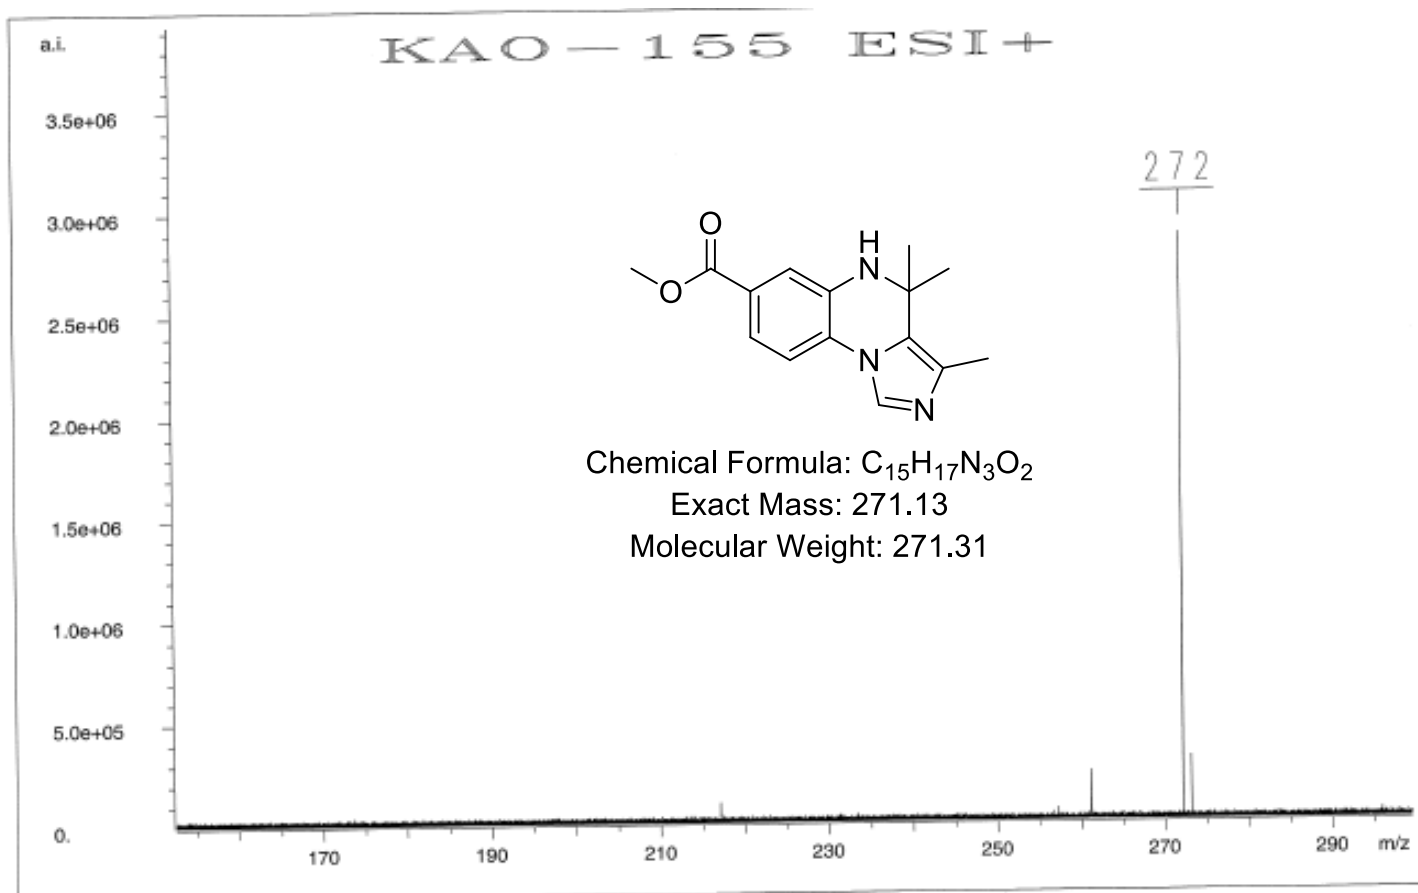

ESI-LRMS of compound **12a**

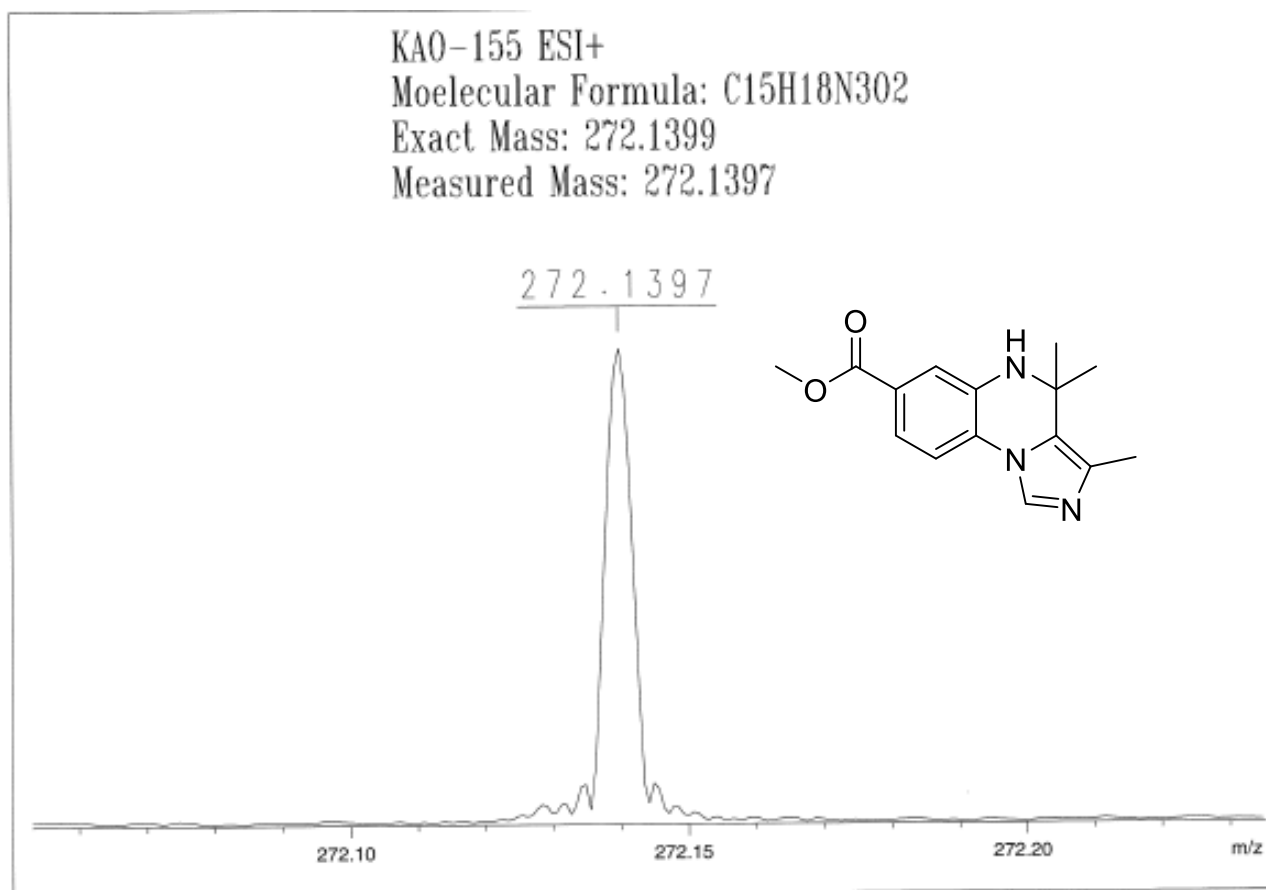

ESI-HRMS of compound **12a**

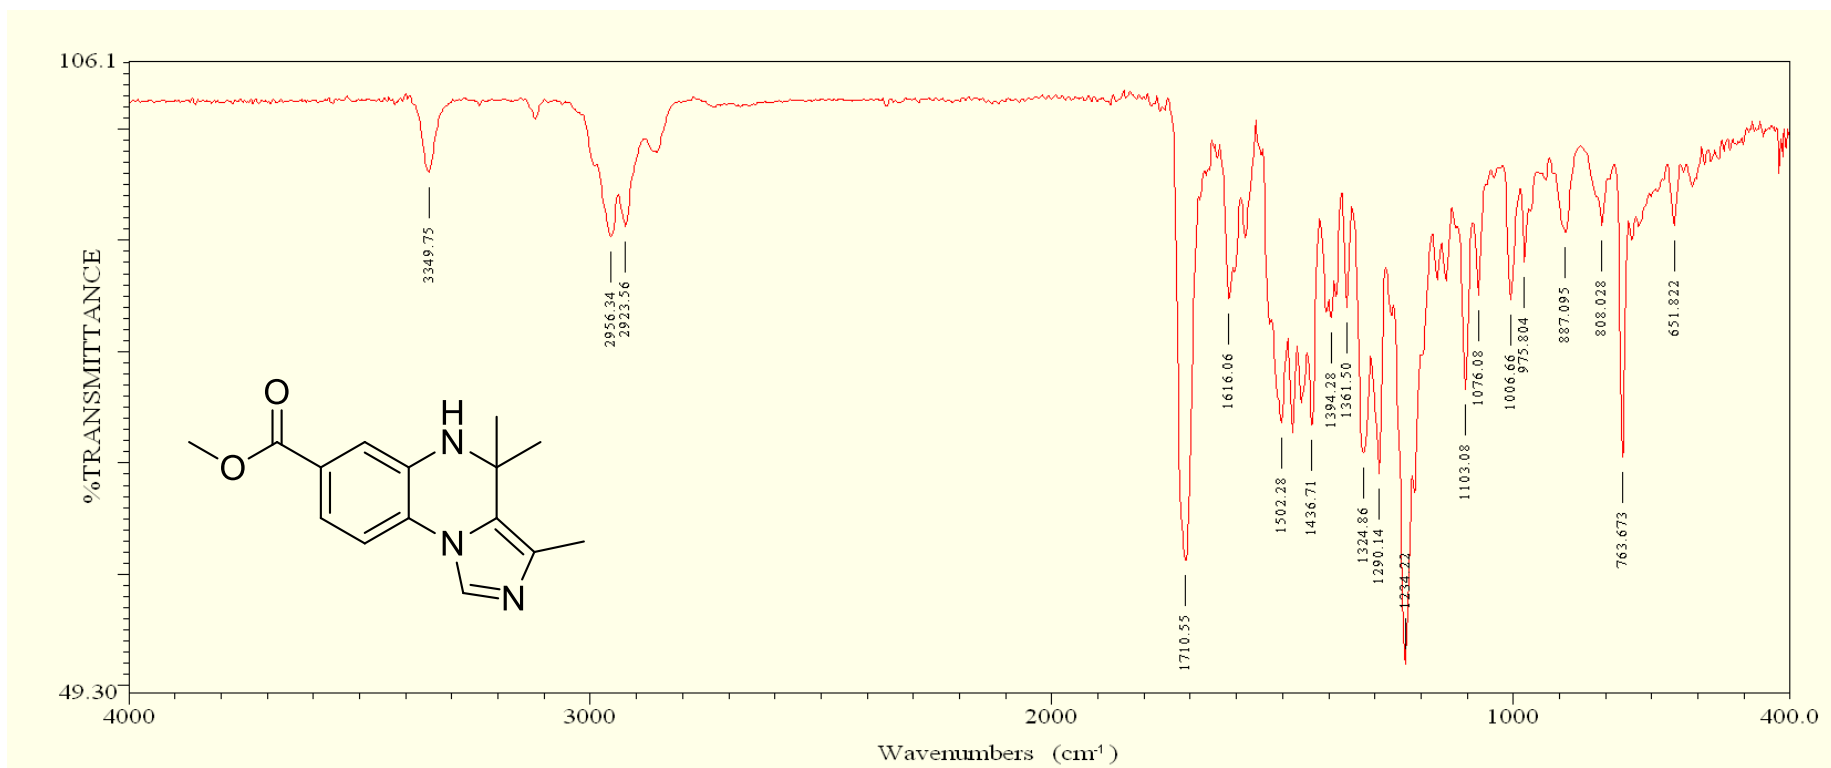

IR spectrum of compound 12a

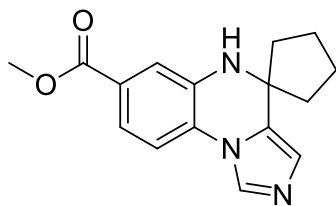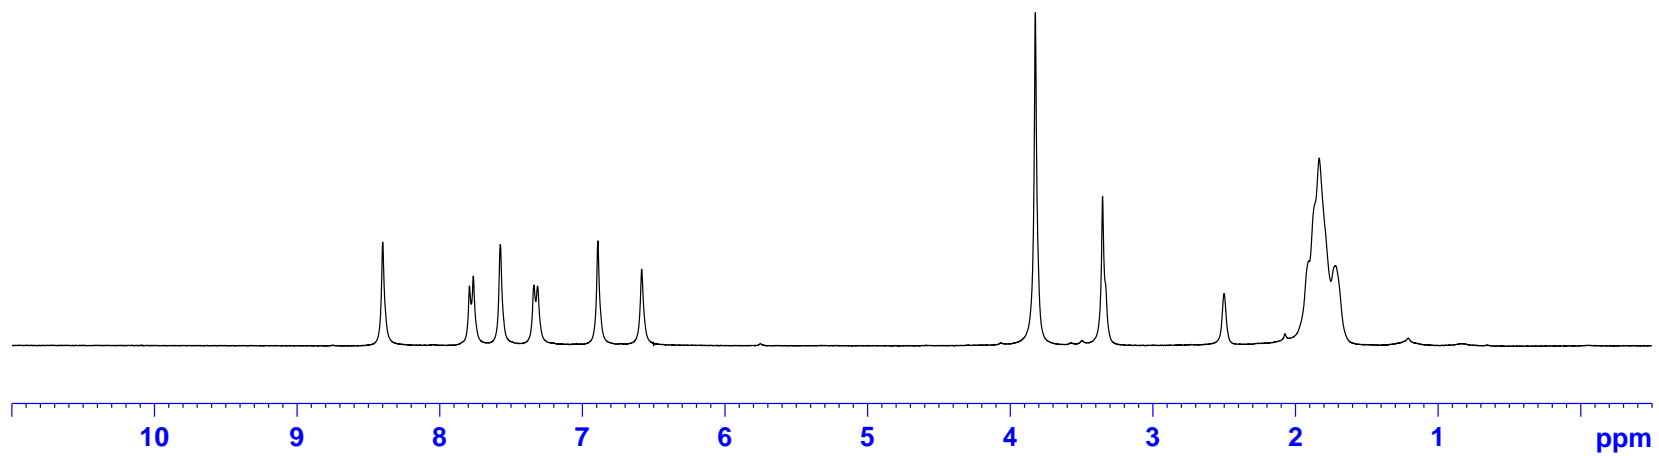

$^1\text{H}$  NMR spectrum (300 MHz) of compound **12b** in  $\text{DMSO-d}_6$

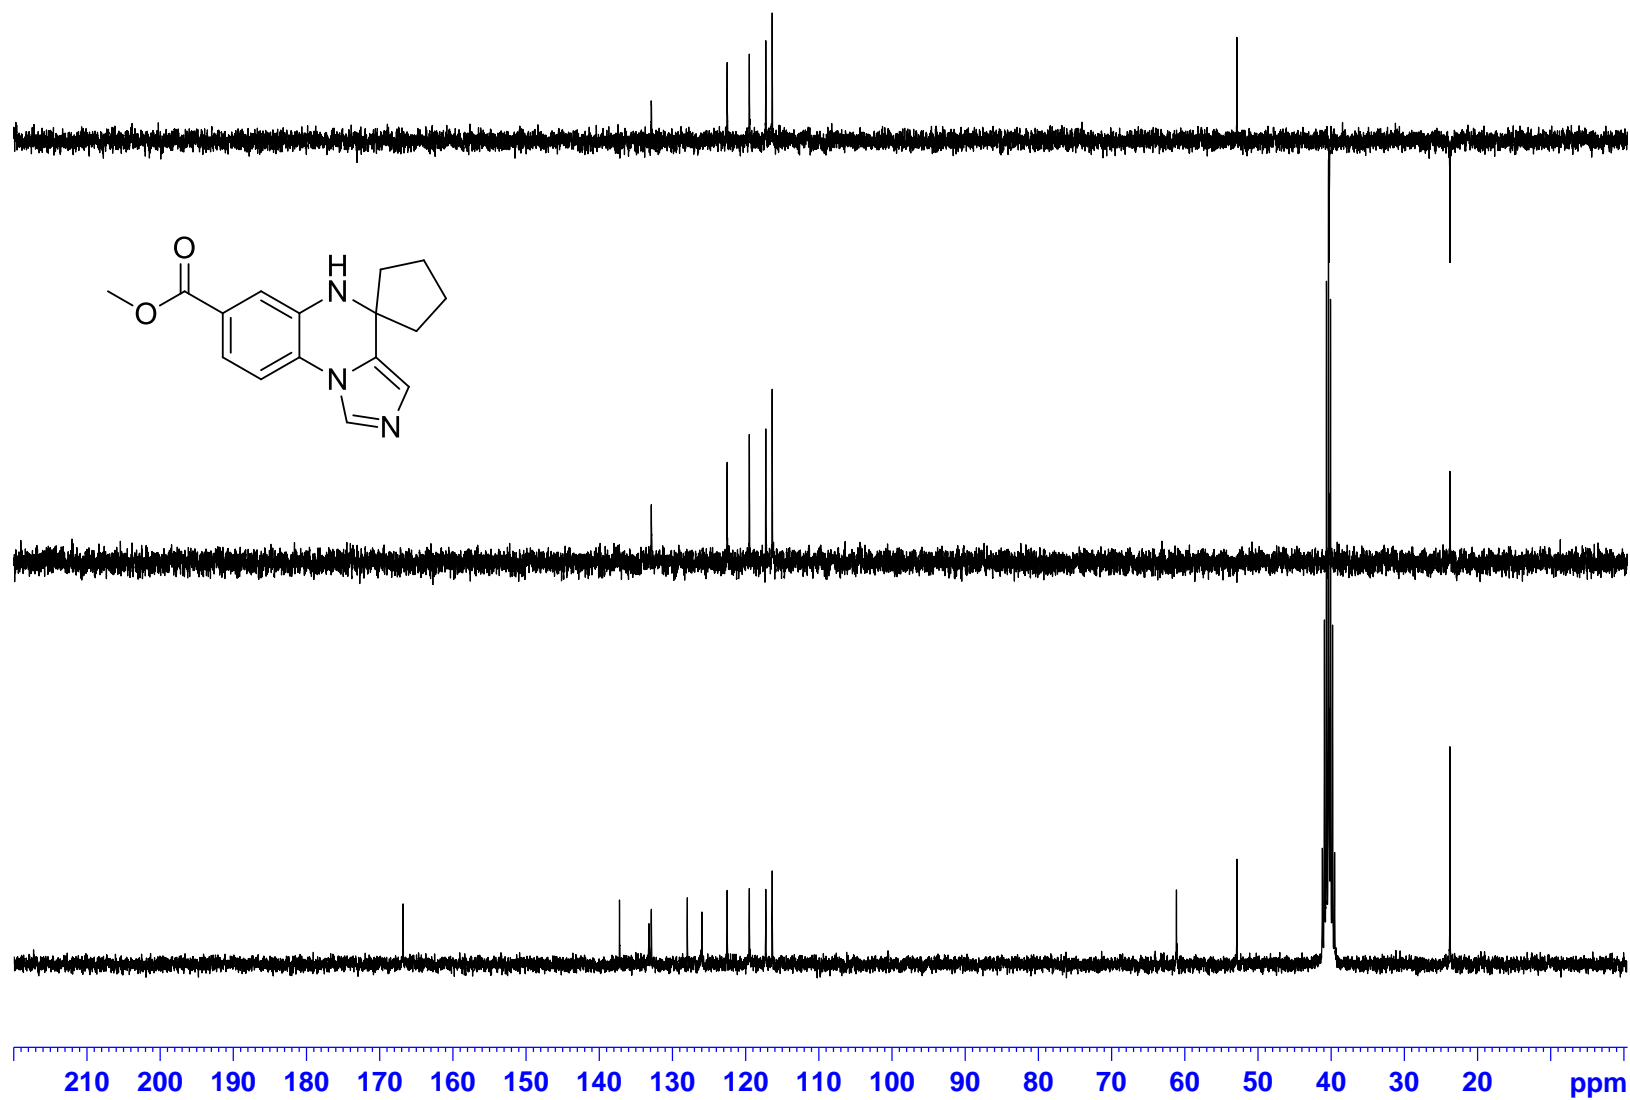

DEPT  $^{13}\text{C}$  NMR spectrum (75 MHz) of compound **12b** in  $\text{DMSO-d}_6$



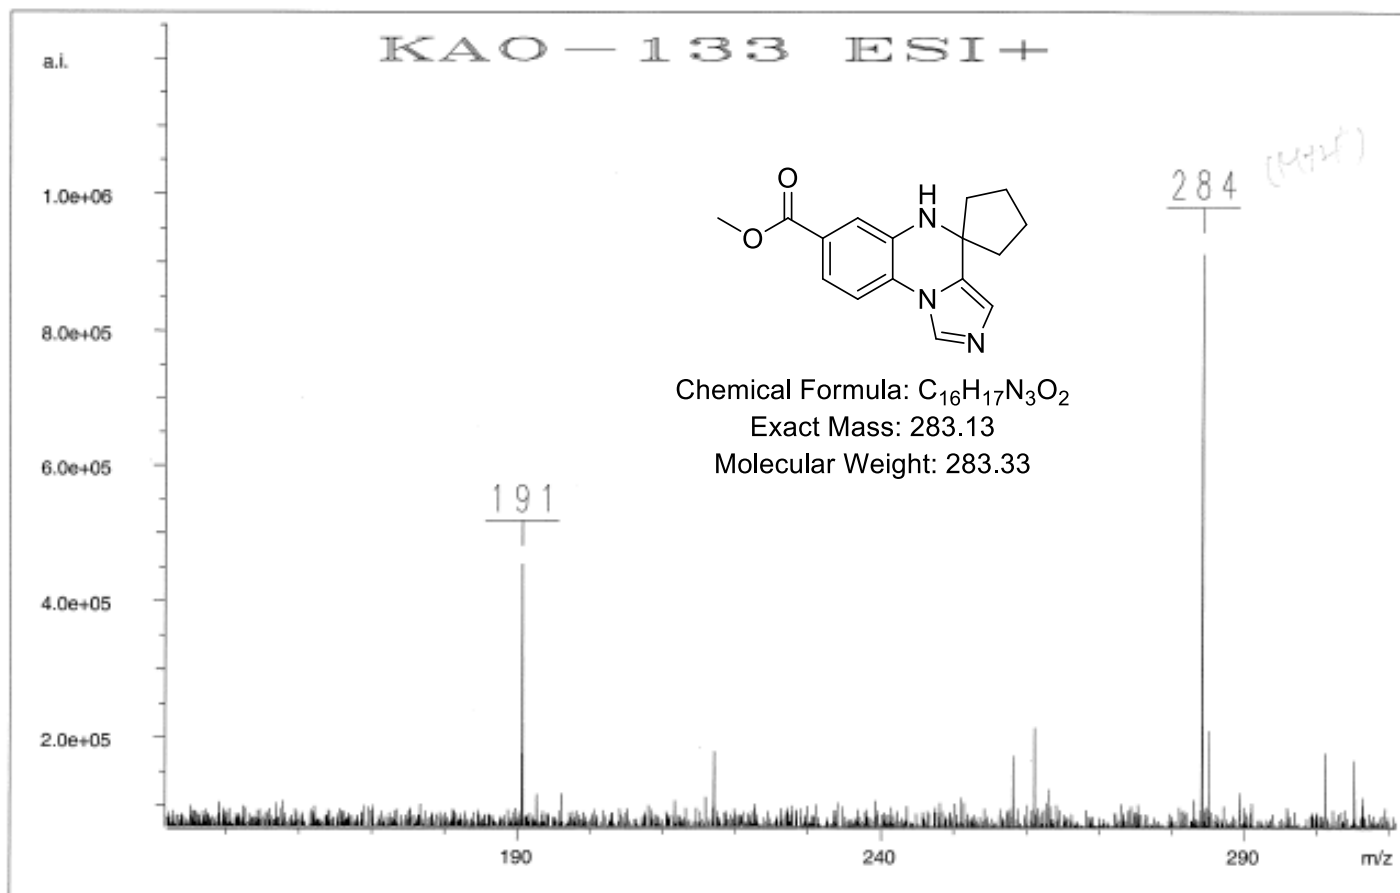

/d=/Data/yu/KAO133/2/pdata/1 Administrator Thu Jun 5 17:08:25 2008

ESI-LRMS of compound **12b**

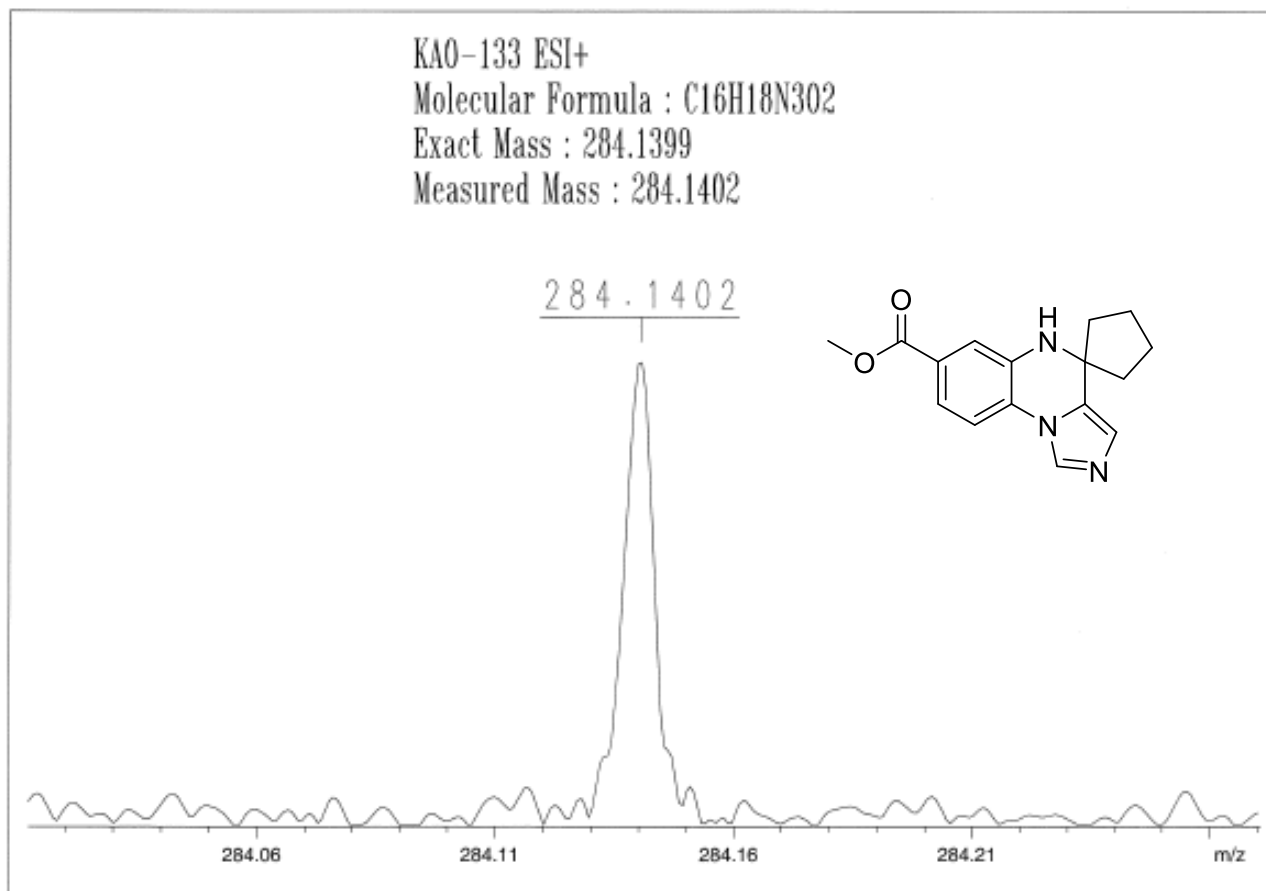

/d=/Data/yu/KA0133/1/pdata/1 Administrator Thu Jun 5 17:11:25 2008

ESI-HRMS of compound **12b**

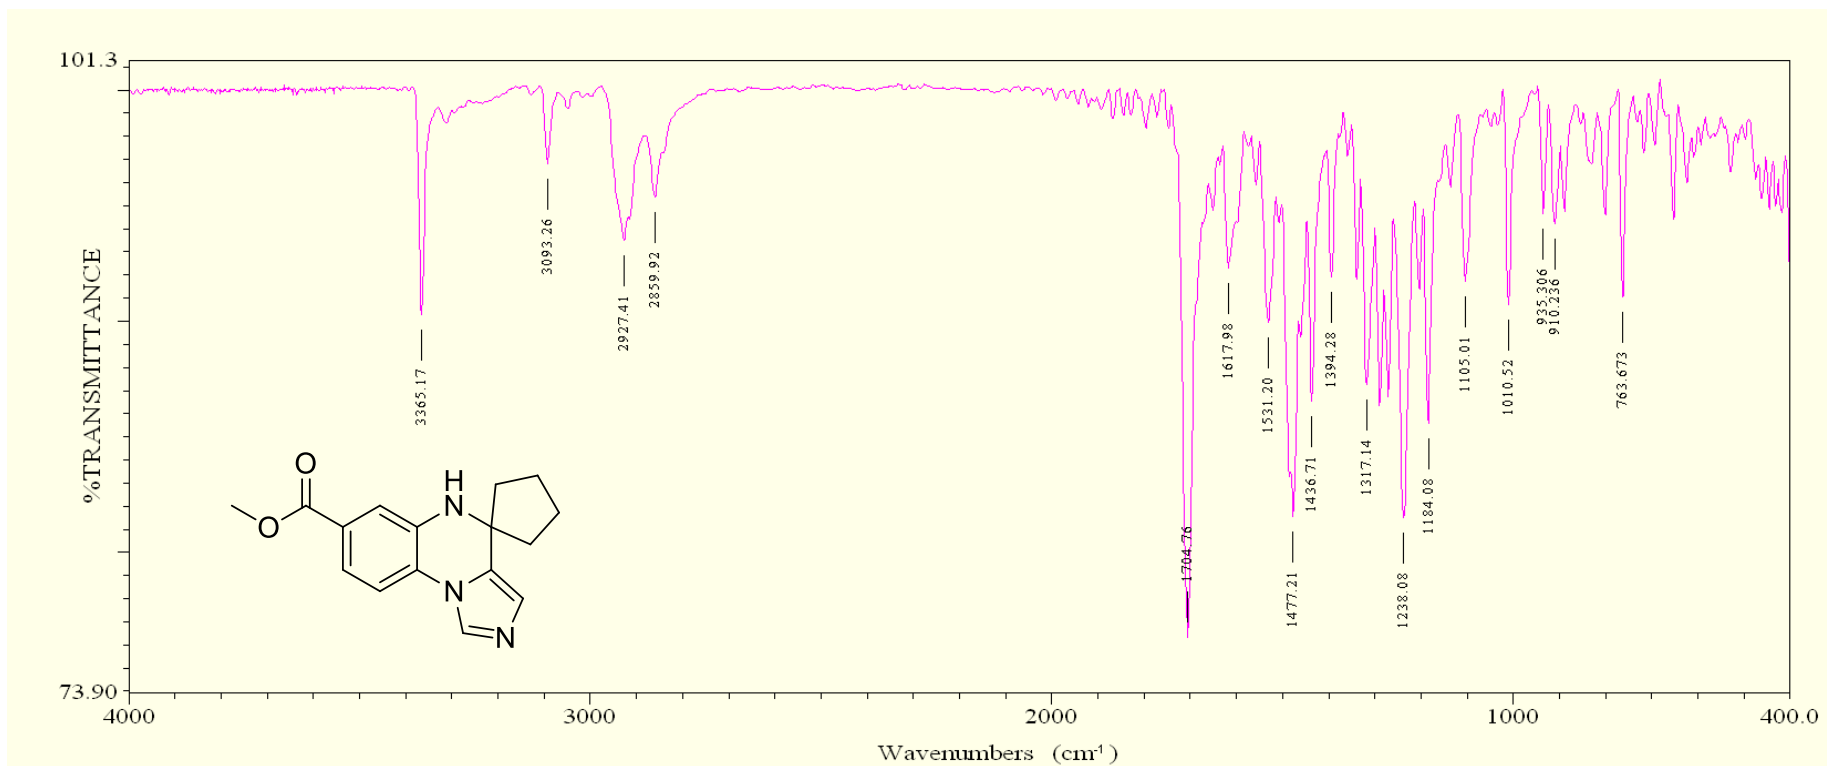

IR spectrum of compound **12b**

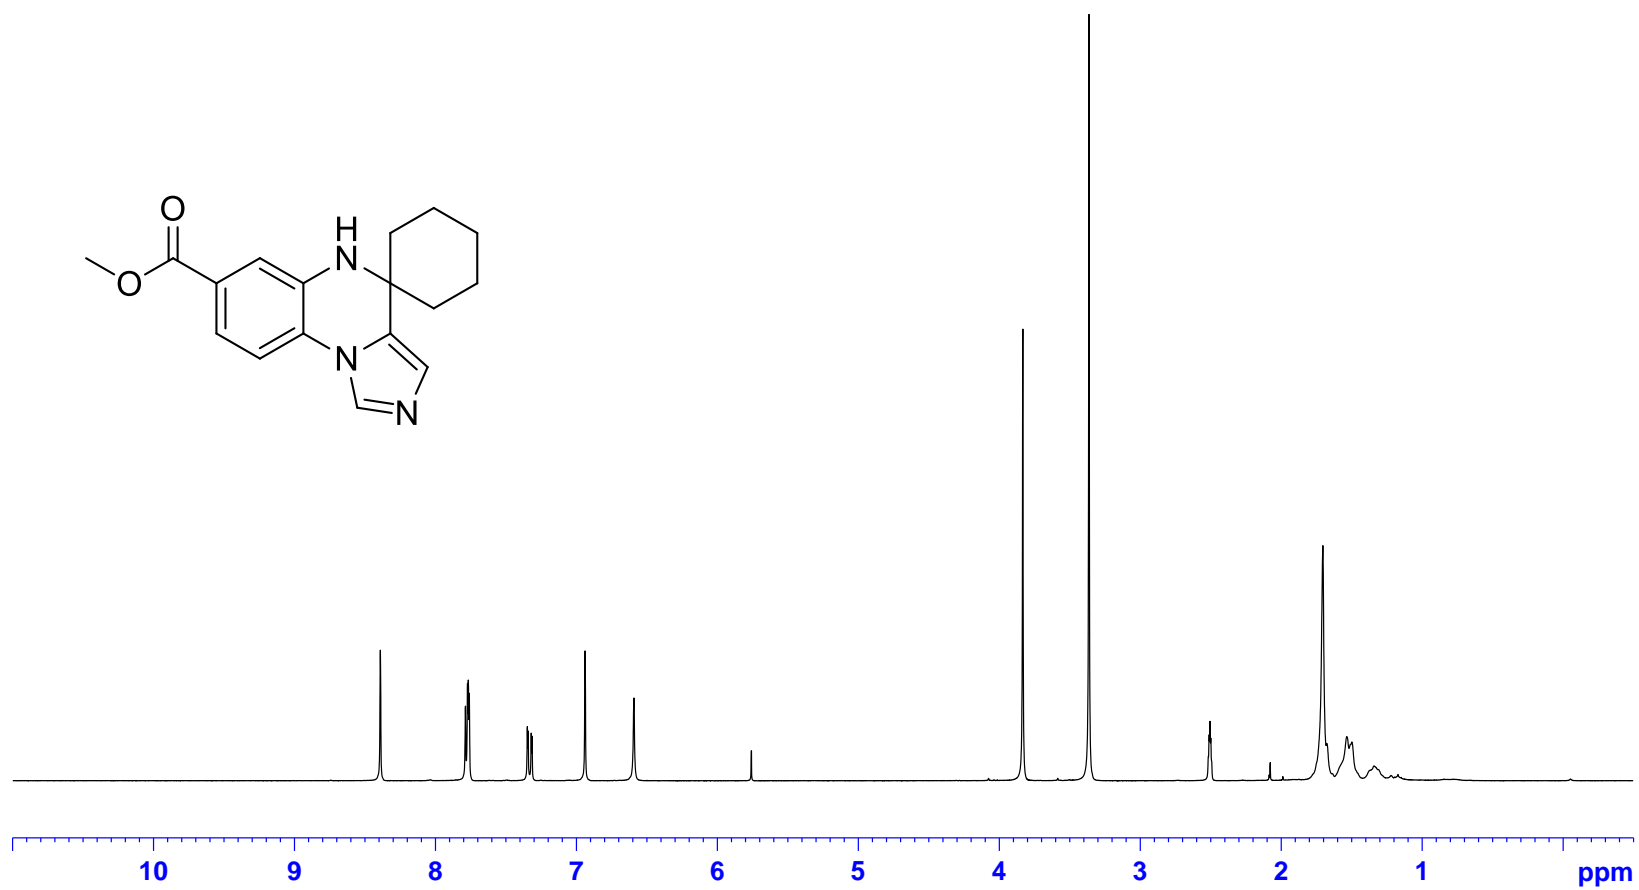

$^1\text{H}$  NMR spectrum (300 MHz) of compound **12c** in  $\text{DMSO-d}_6$

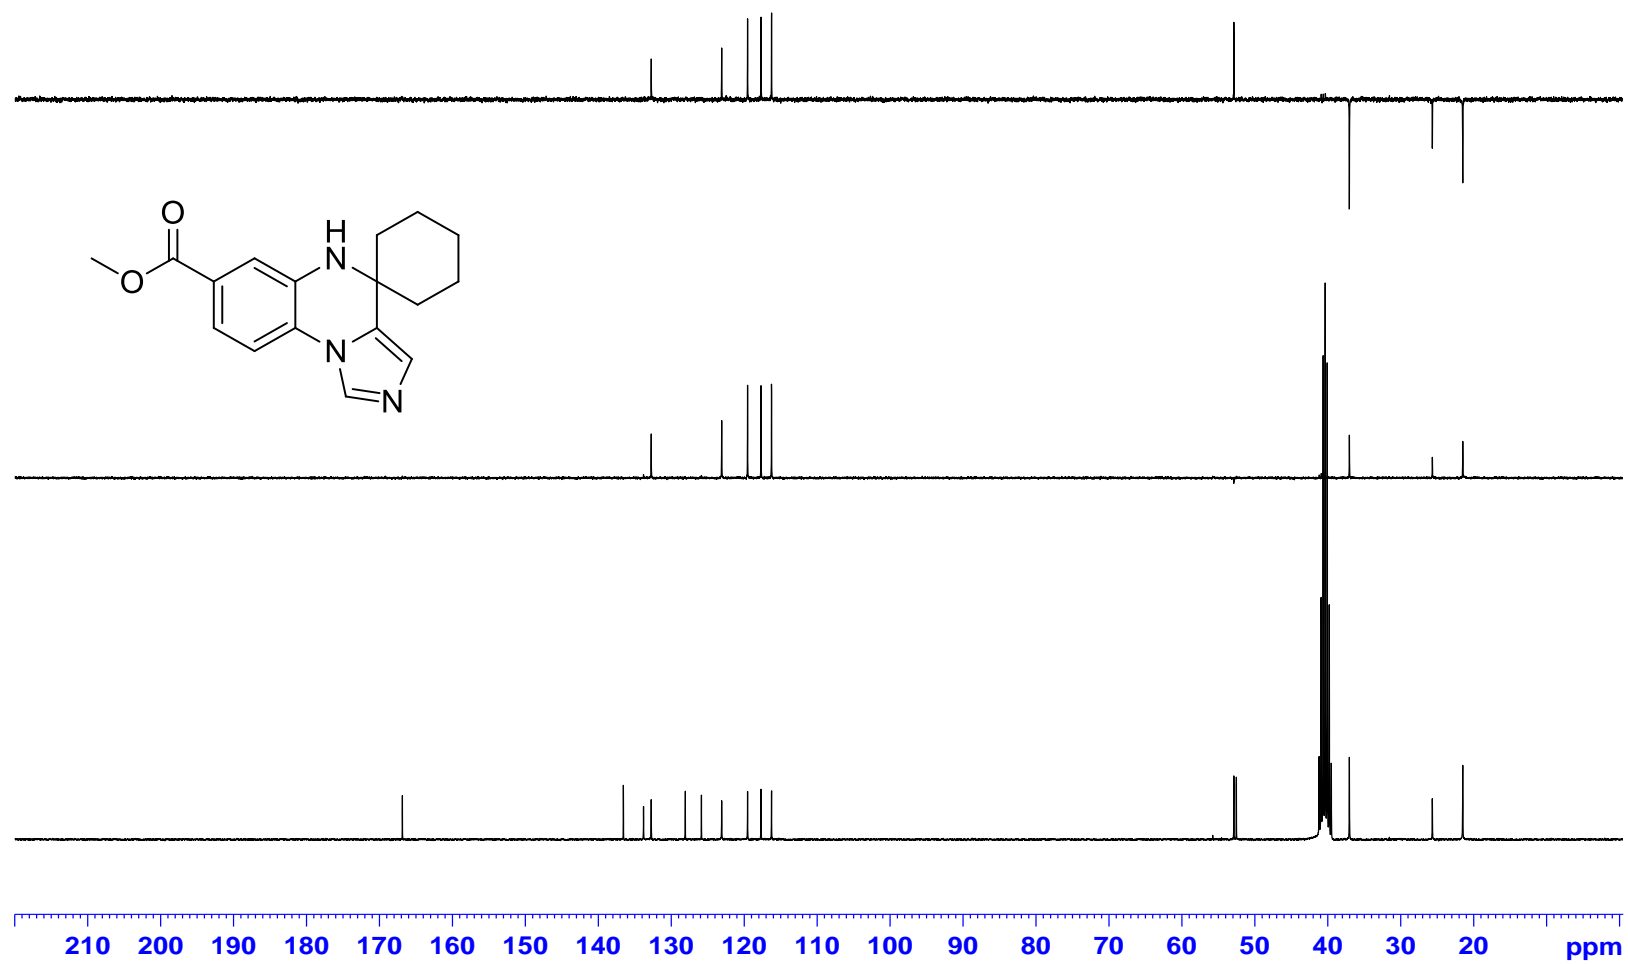

DEPT  $^{13}\text{C}$  NMR spectrum (75 MHz) of compound **12c** in  $\text{DMSO-d}_6$

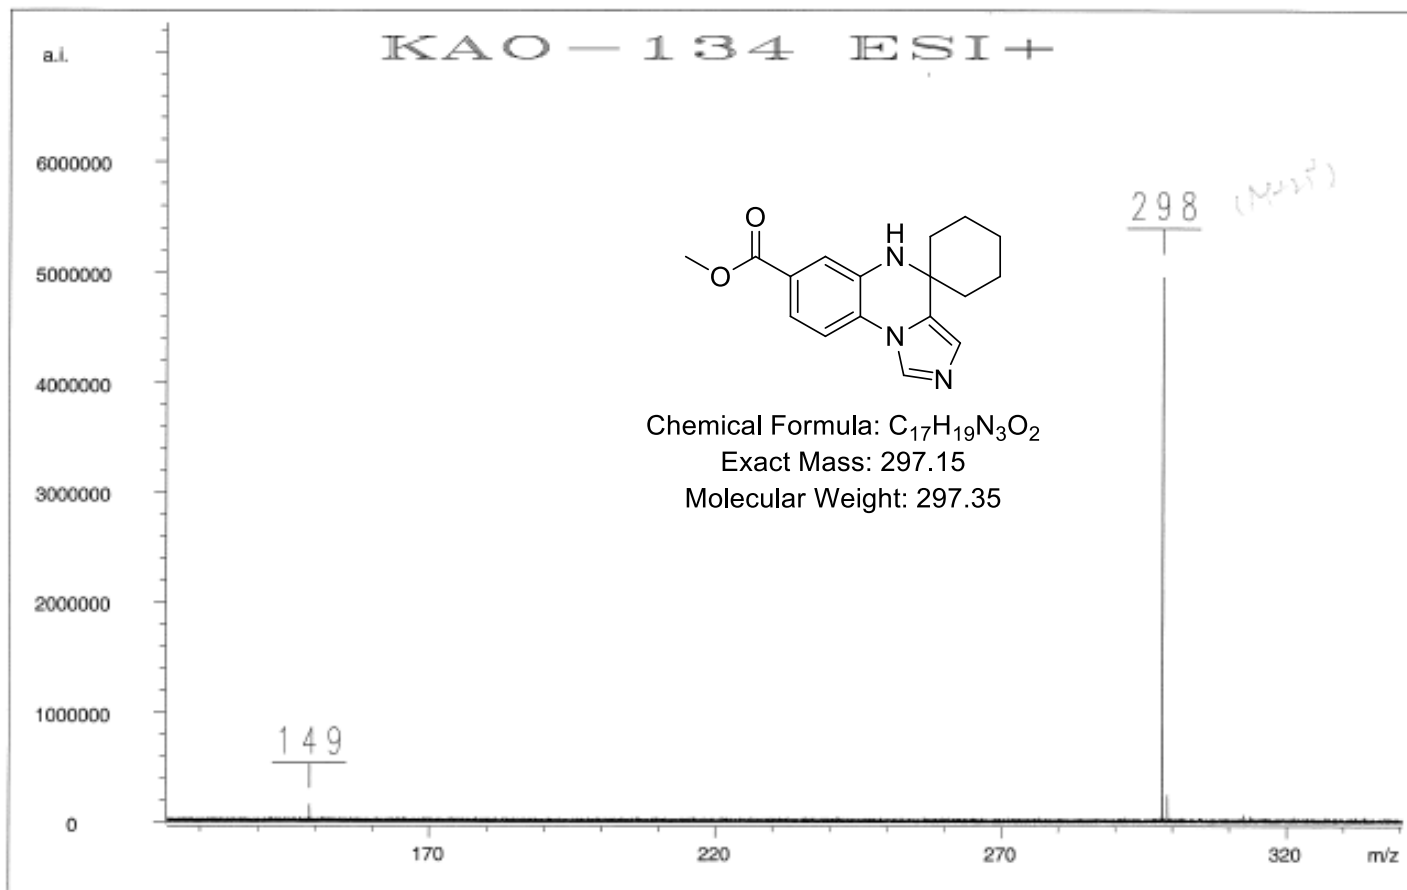

/d=/Data/yu/KAO134/1/pdata/1 Administrator Thu Jun 5 17:16:47 2008

ESI-LRMS of compound **12c**

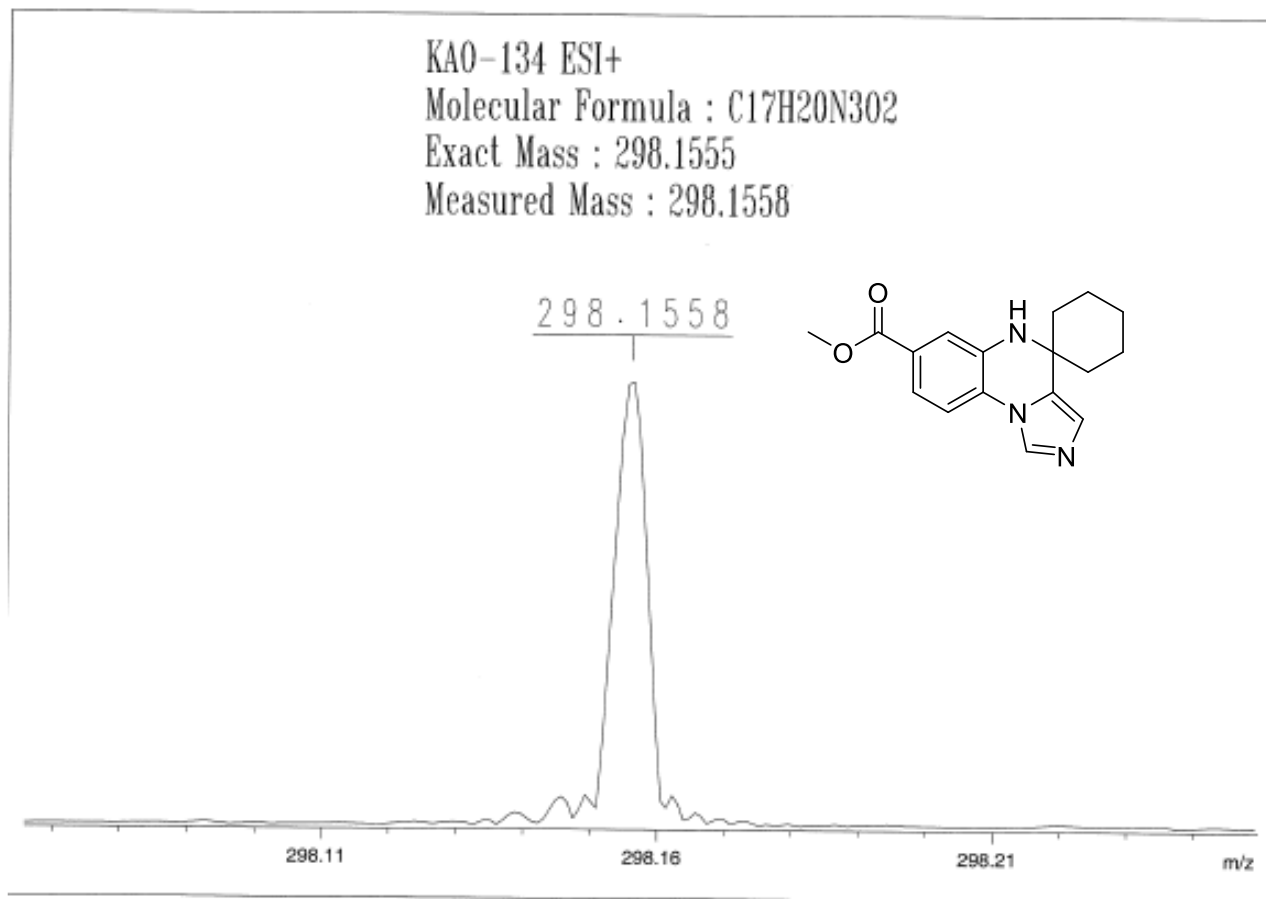

ESI-HRMS of compound **12c**

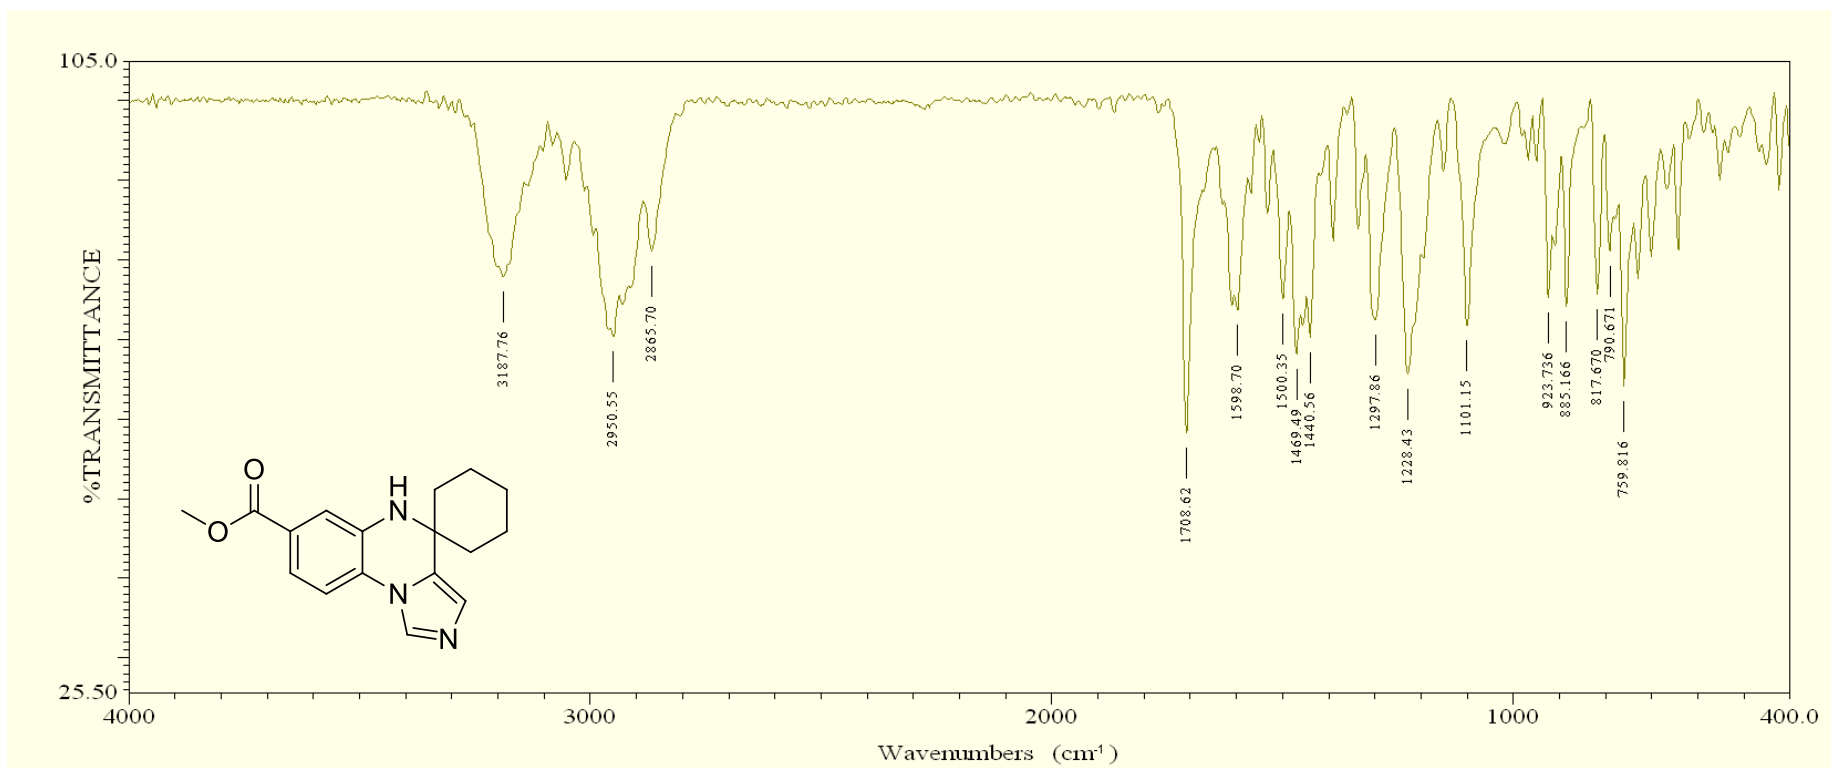

IR spectrum of compound **12c**



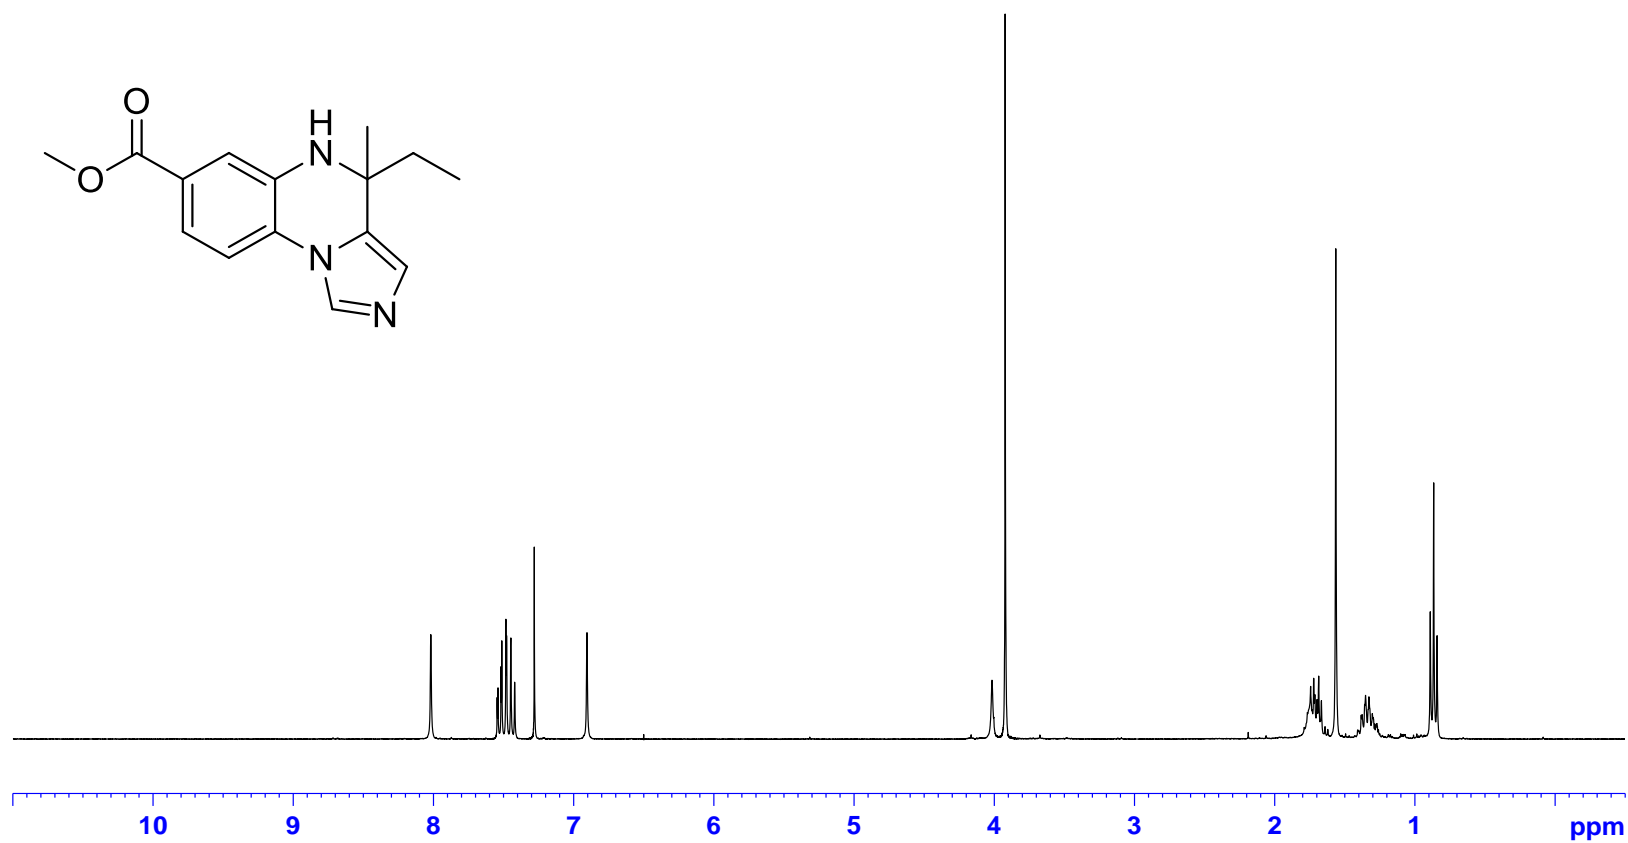

<sup>1</sup>H NMR spectrum (300 MHz) of compound **12d** in CDCl<sub>3</sub>

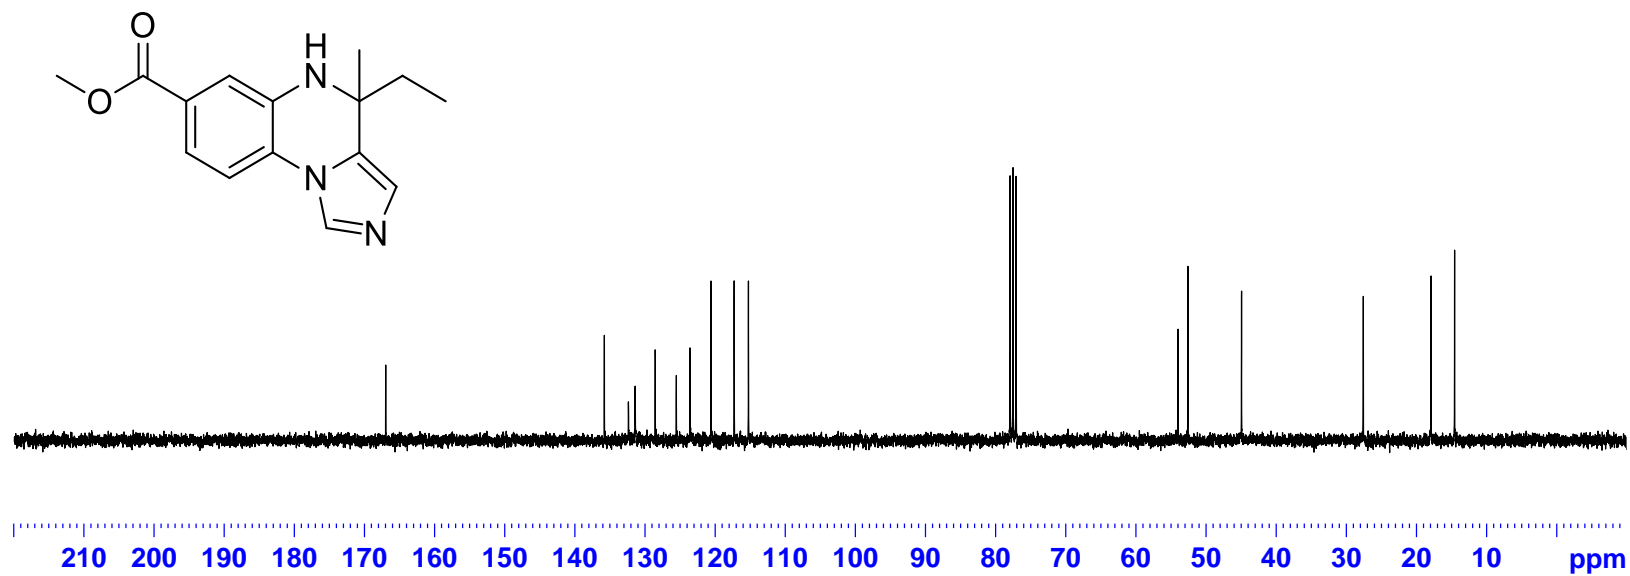

$^{13}\text{C}$  NMR spectrum (75 MHz) of compound **12d** in  $\text{CDCl}_3$

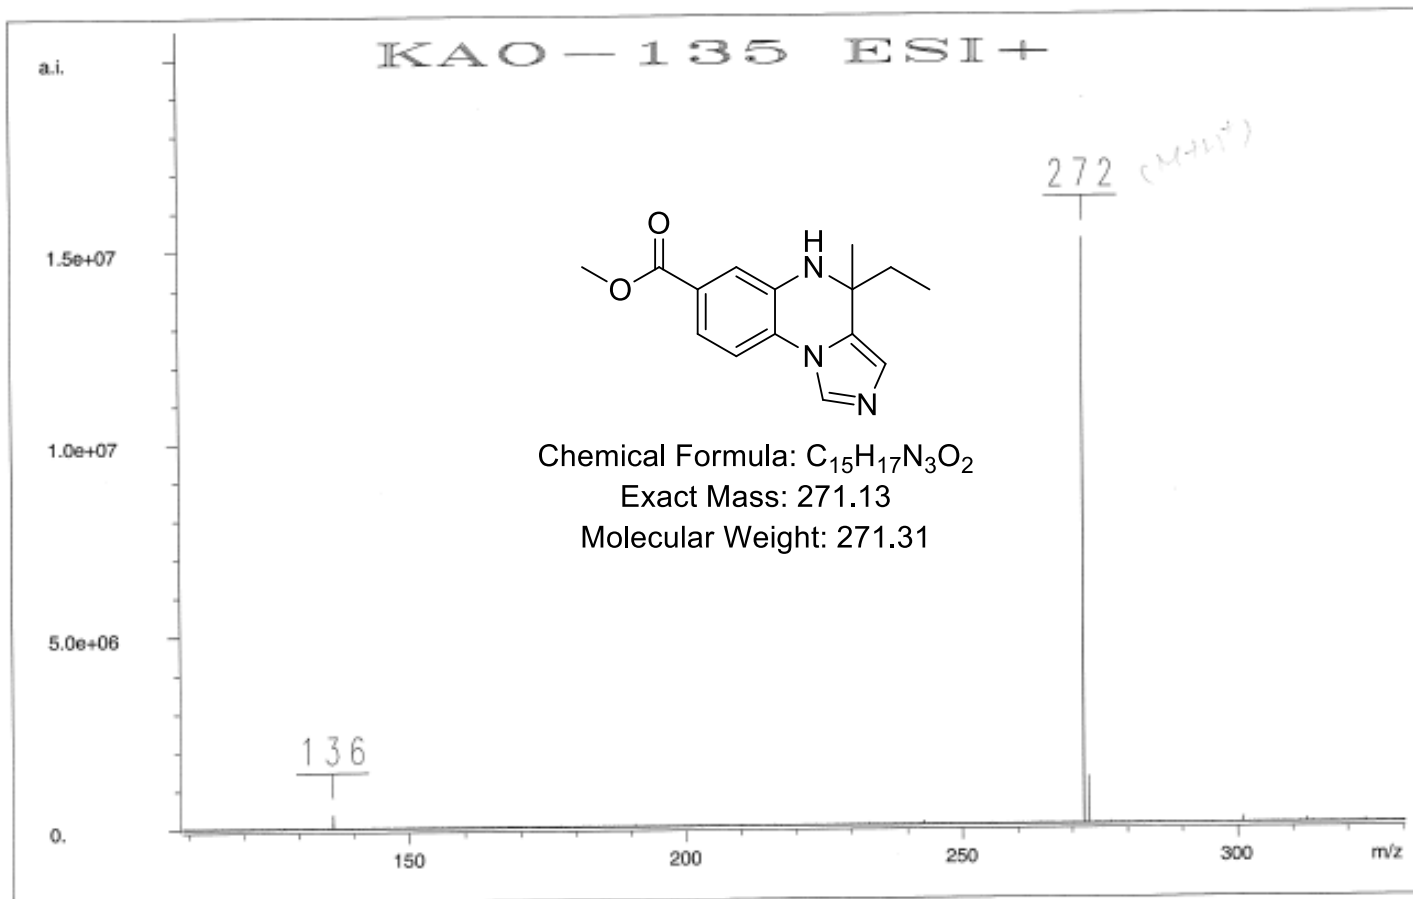

ESI-LRMS of compound **12d**

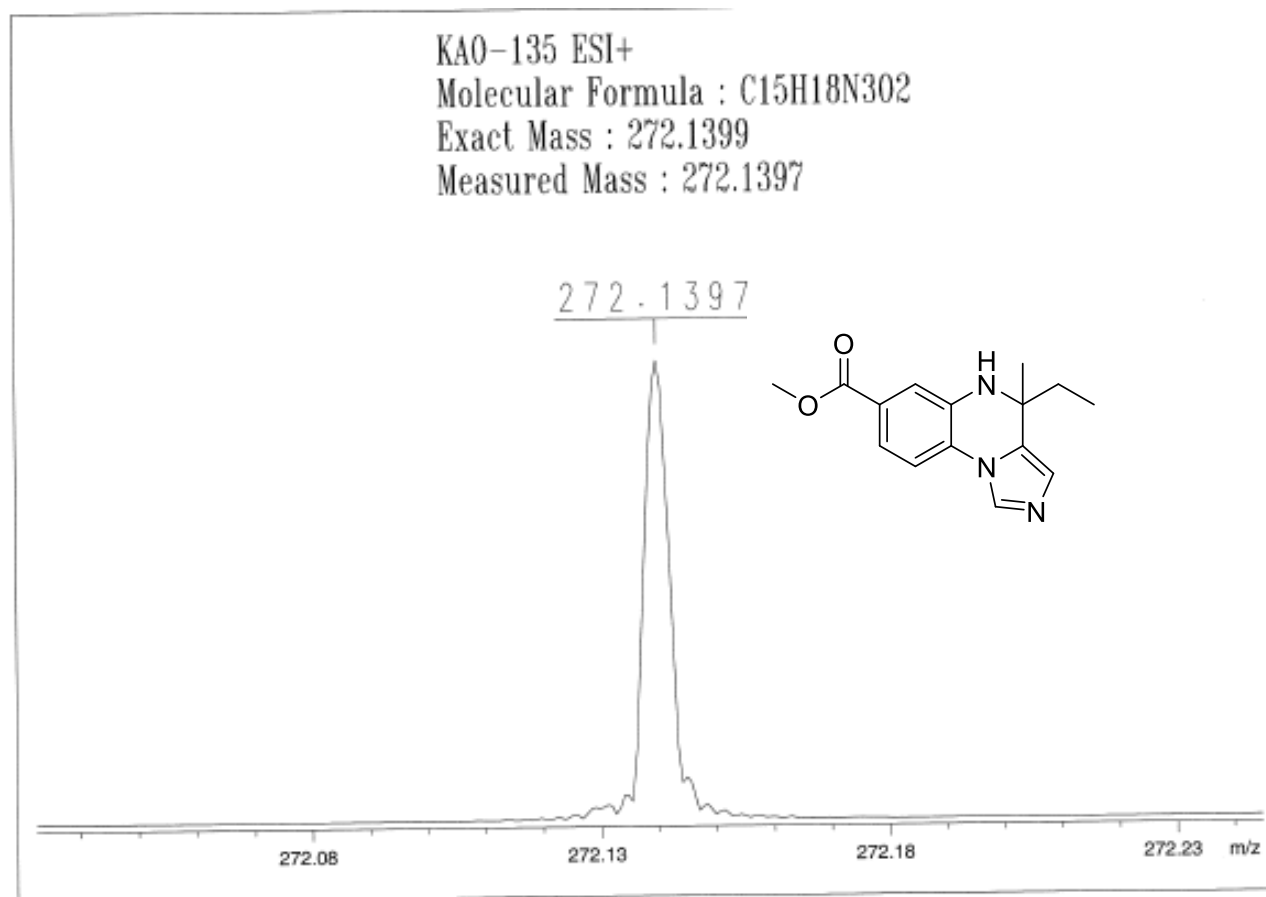

ESI-HRMS of compound **12d**

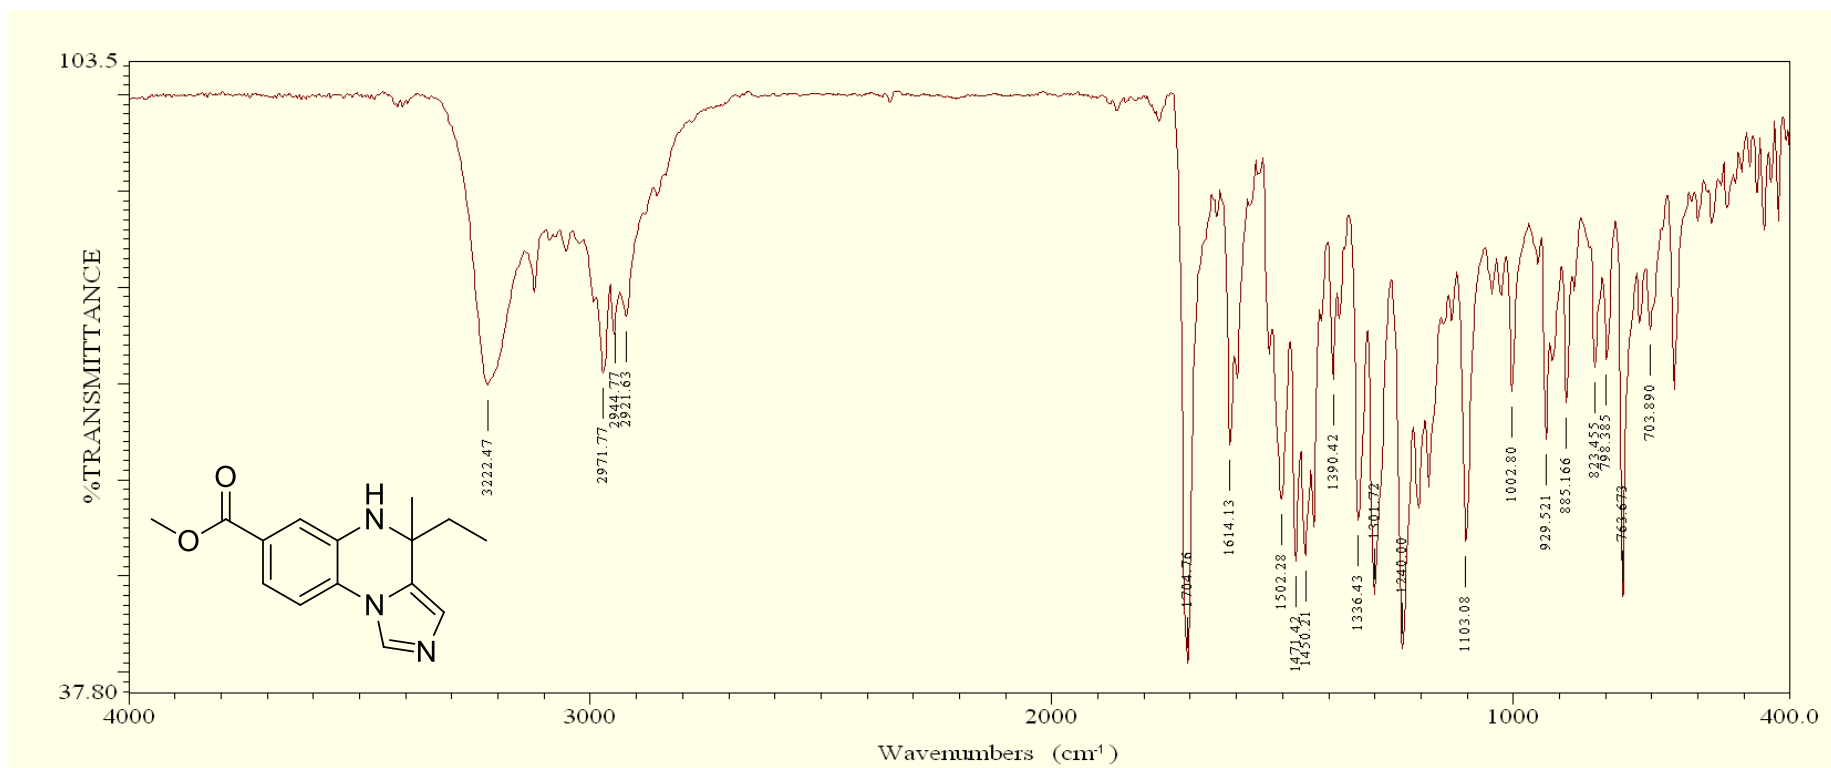

IR spectrum of compound 12d

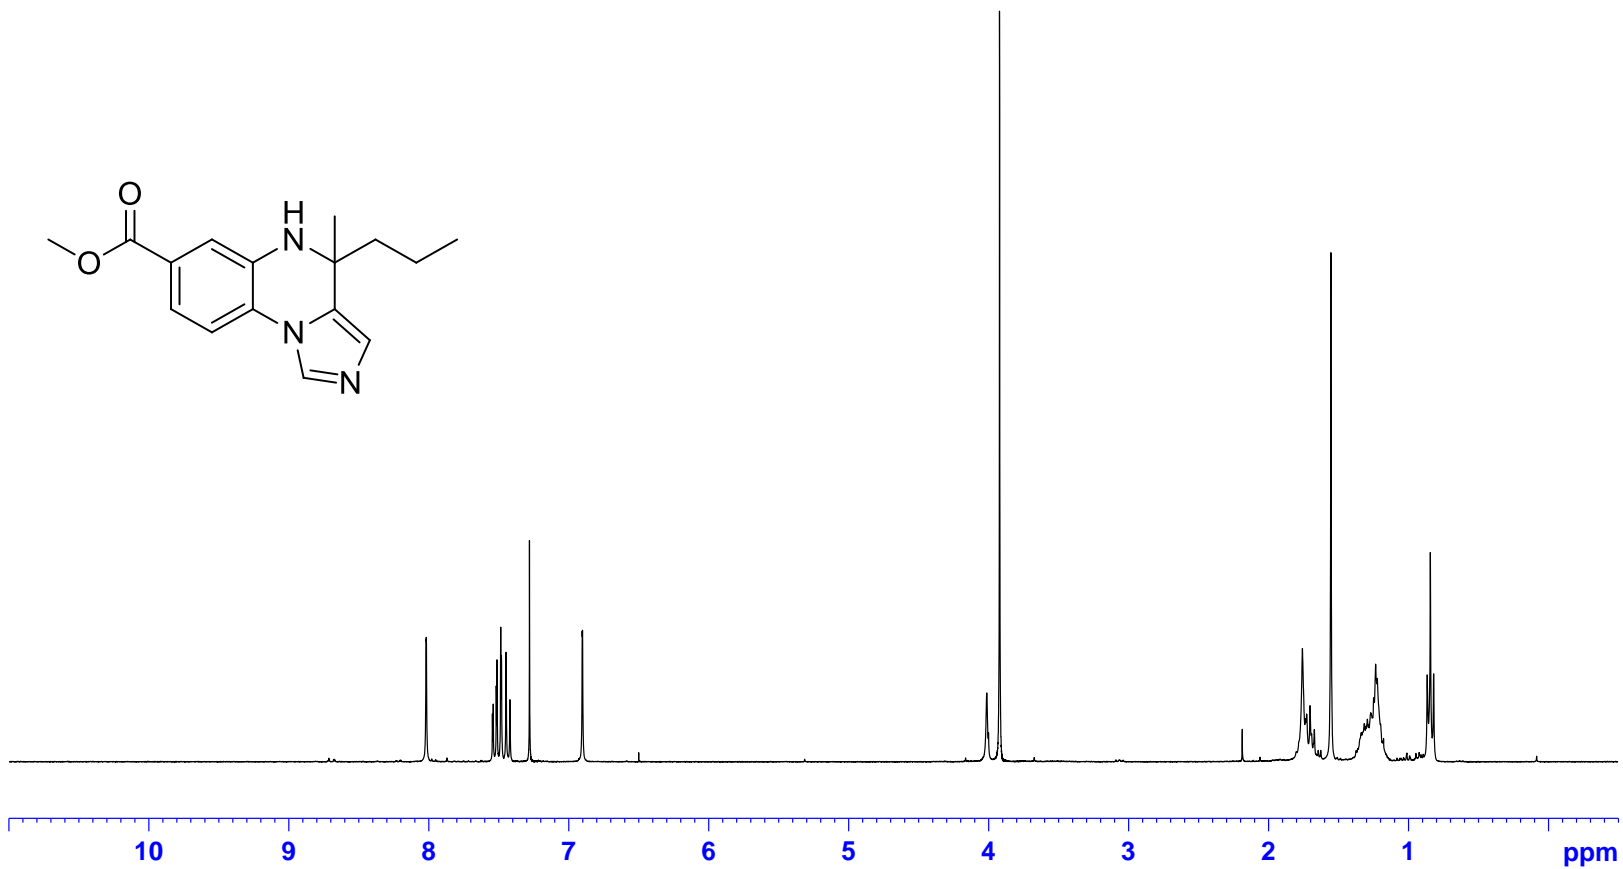

$^1\text{H}$  NMR spectrum (300 MHz) of compound **12e** in  $\text{CDCl}_3$

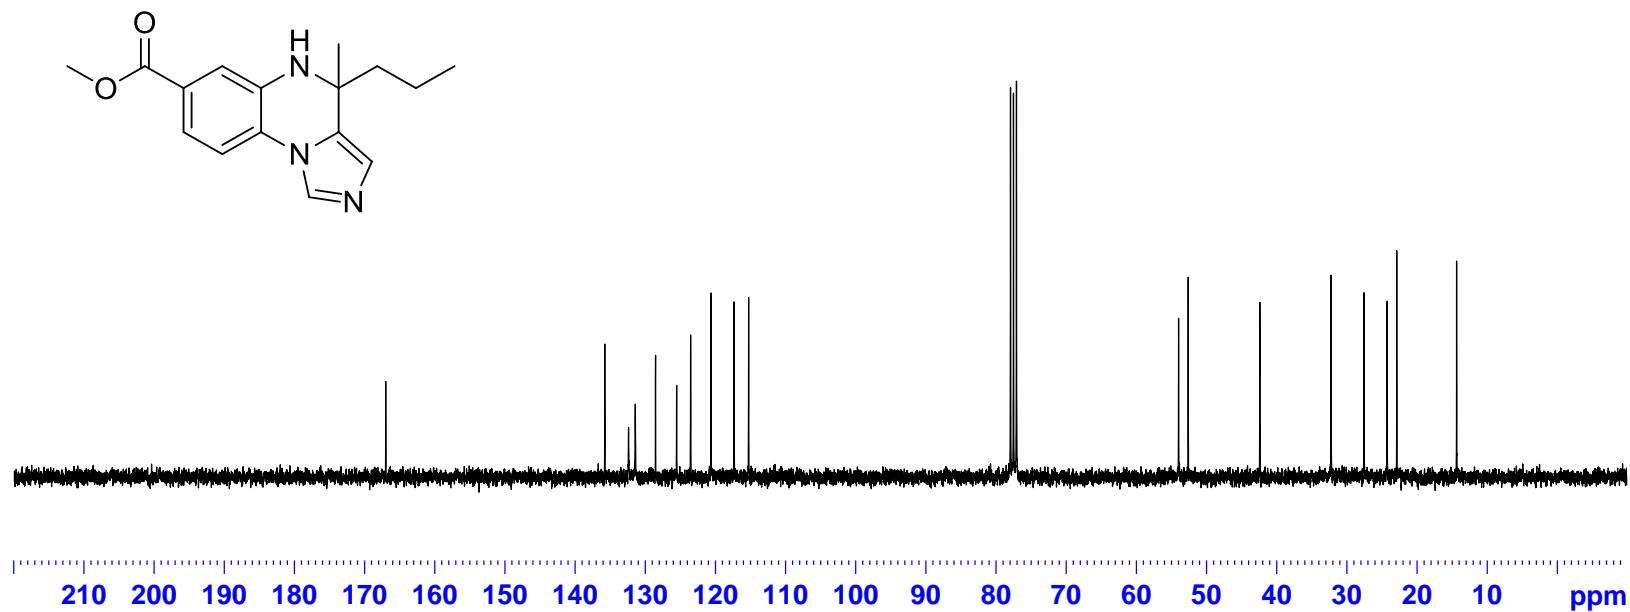

$^{13}\text{C}$  NMR spectrum (75 MHz) of compound **12e** in  $\text{CDCl}_3$

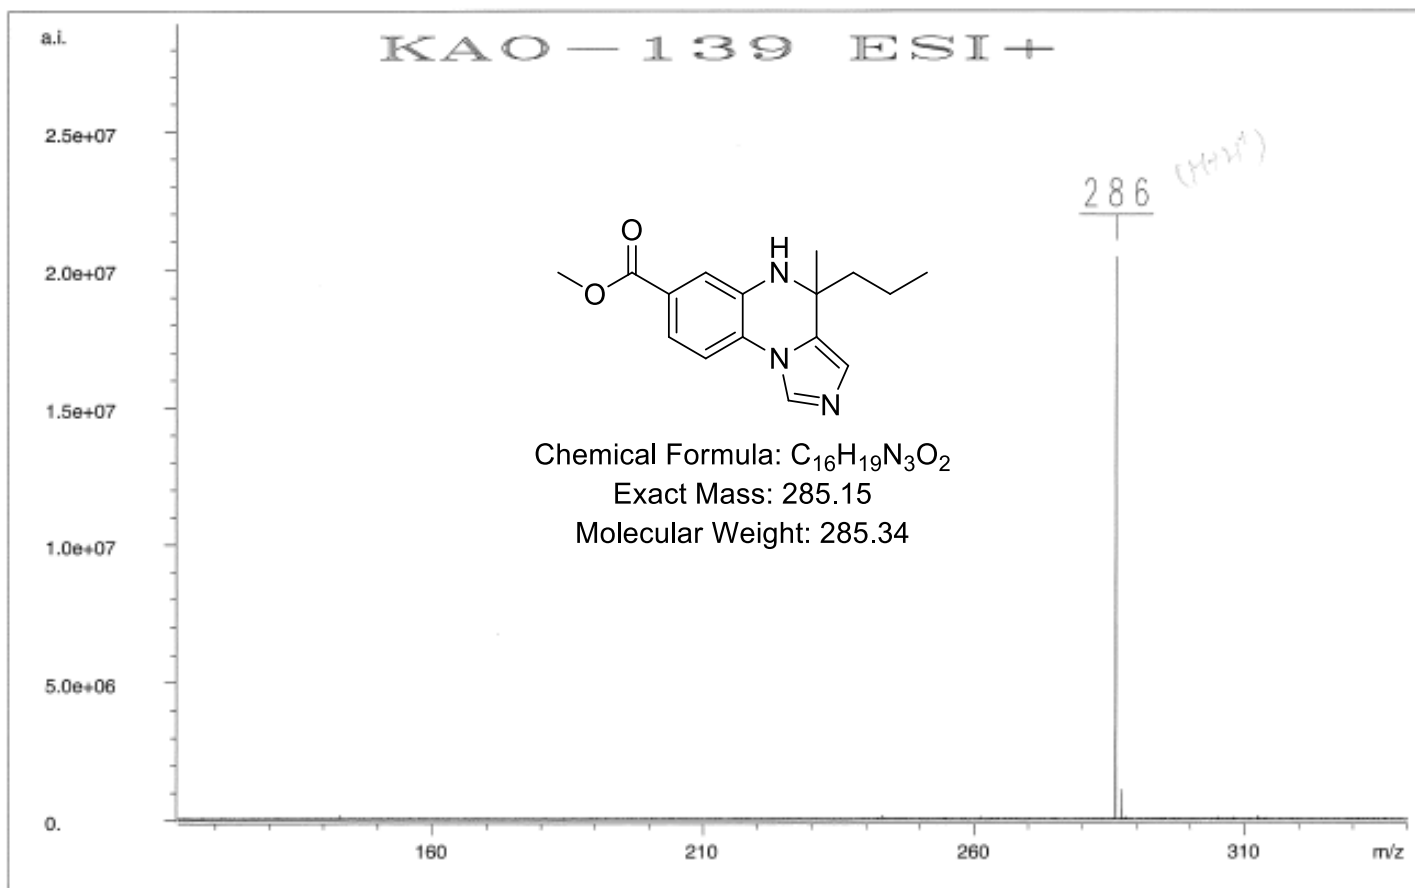

ESI-LRMS of compound **12e**



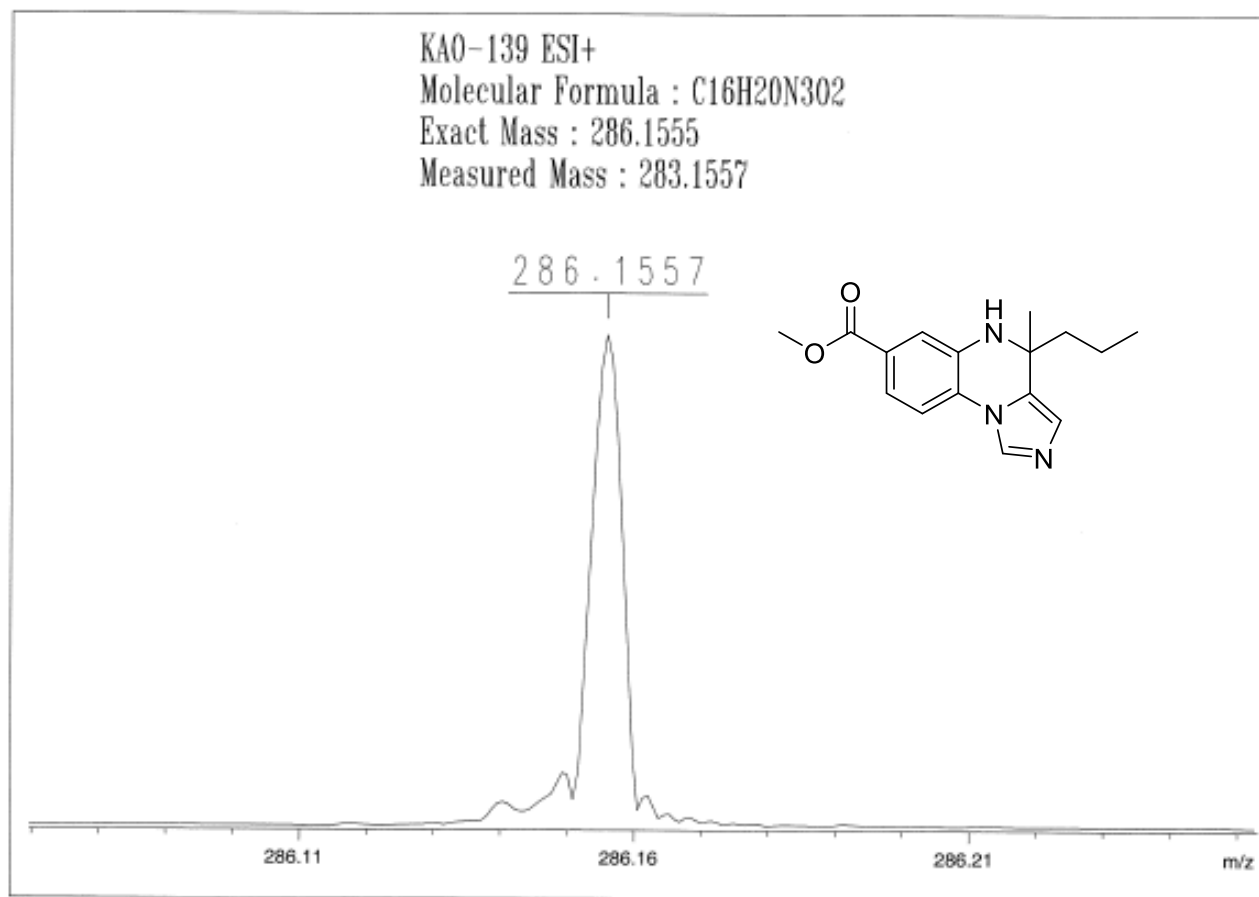

ESI-HRMS of compound **12e**

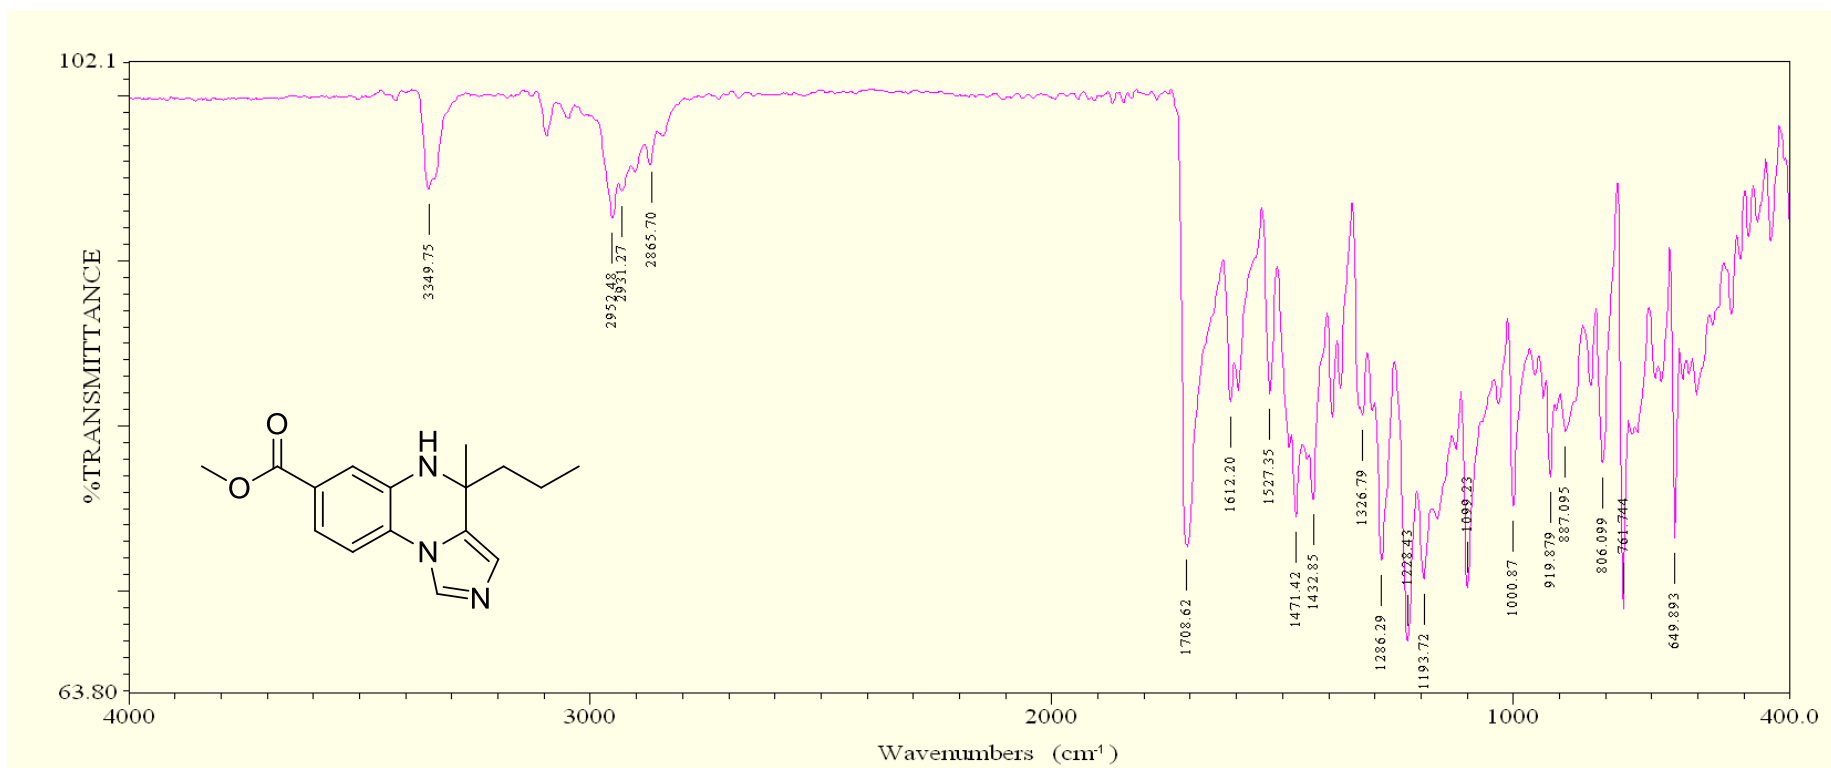

IR spectrum of compound **12e**

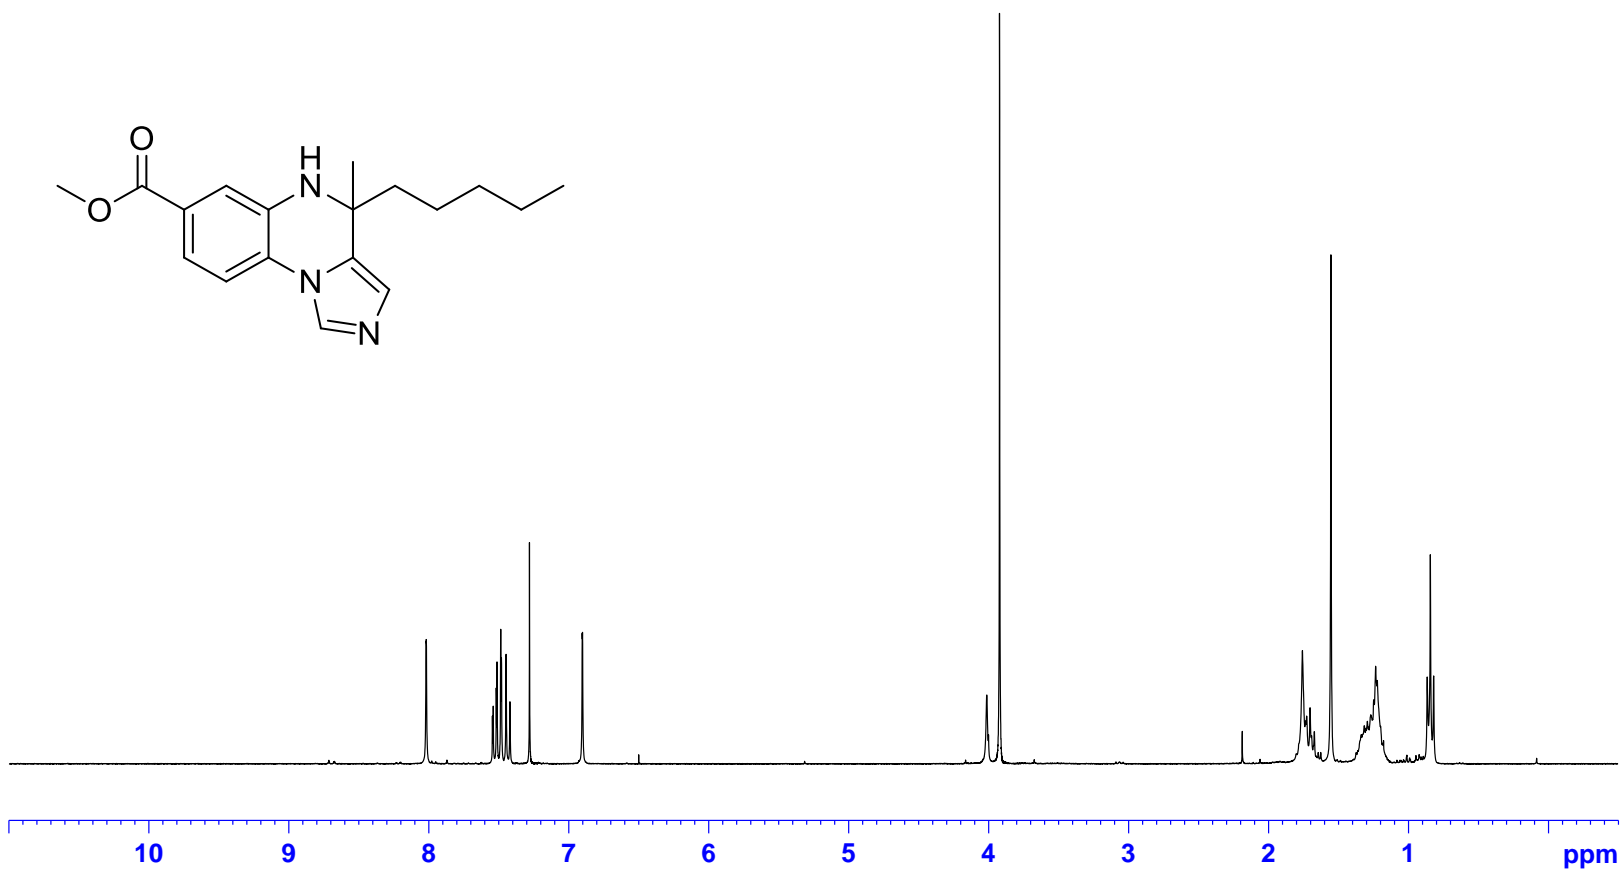

<sup>1</sup>H NMR spectrum (300 MHz) of compound **12f** in CDCl<sub>3</sub>

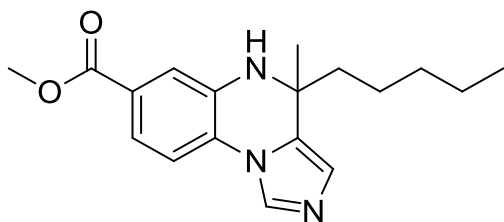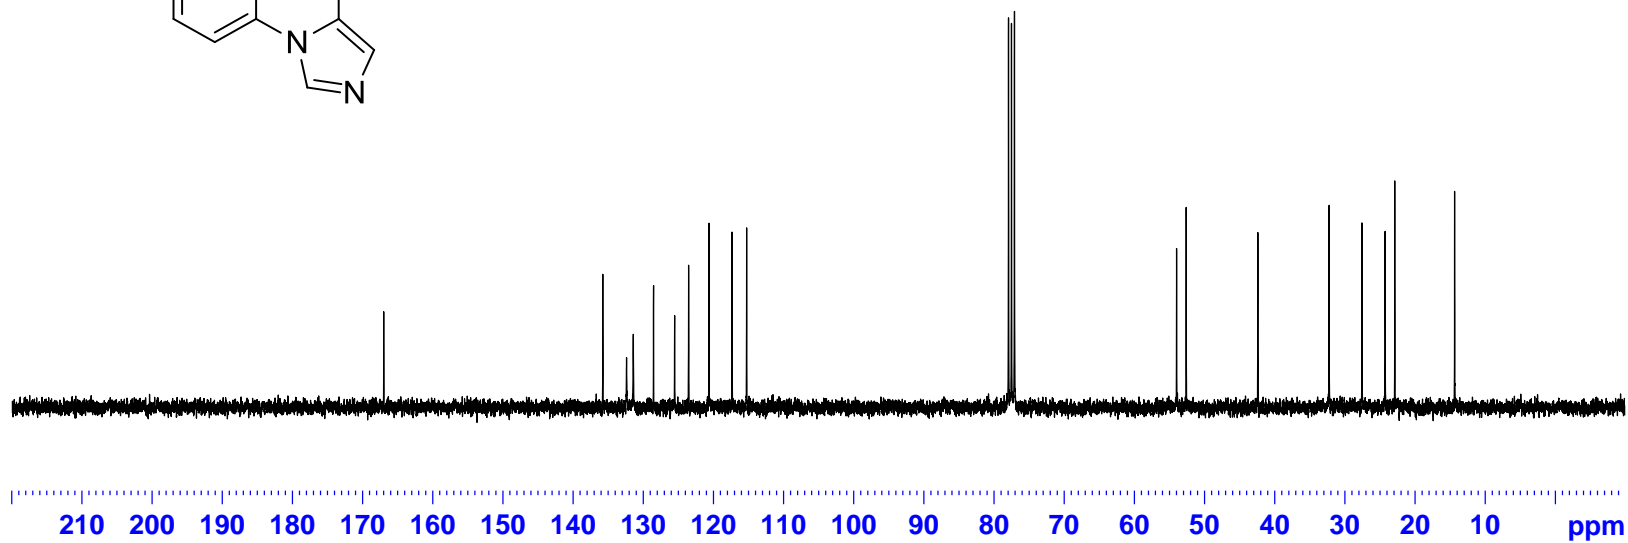

<sup>13</sup>C NMR spectrum (75 MHz) of compound **12f** in CDCl<sub>3</sub>

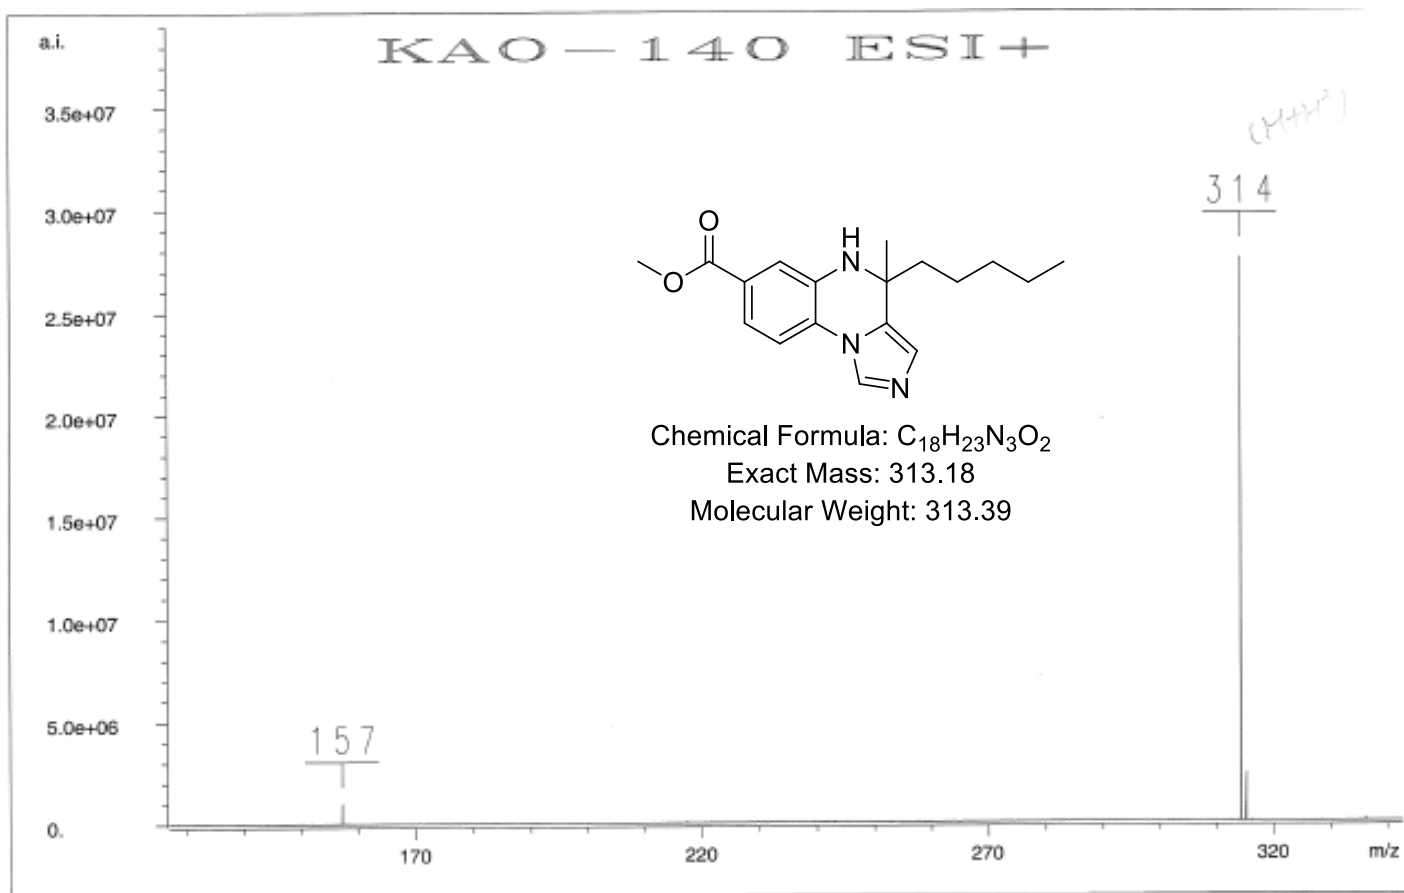

ESI-LRMS of compound **12f**

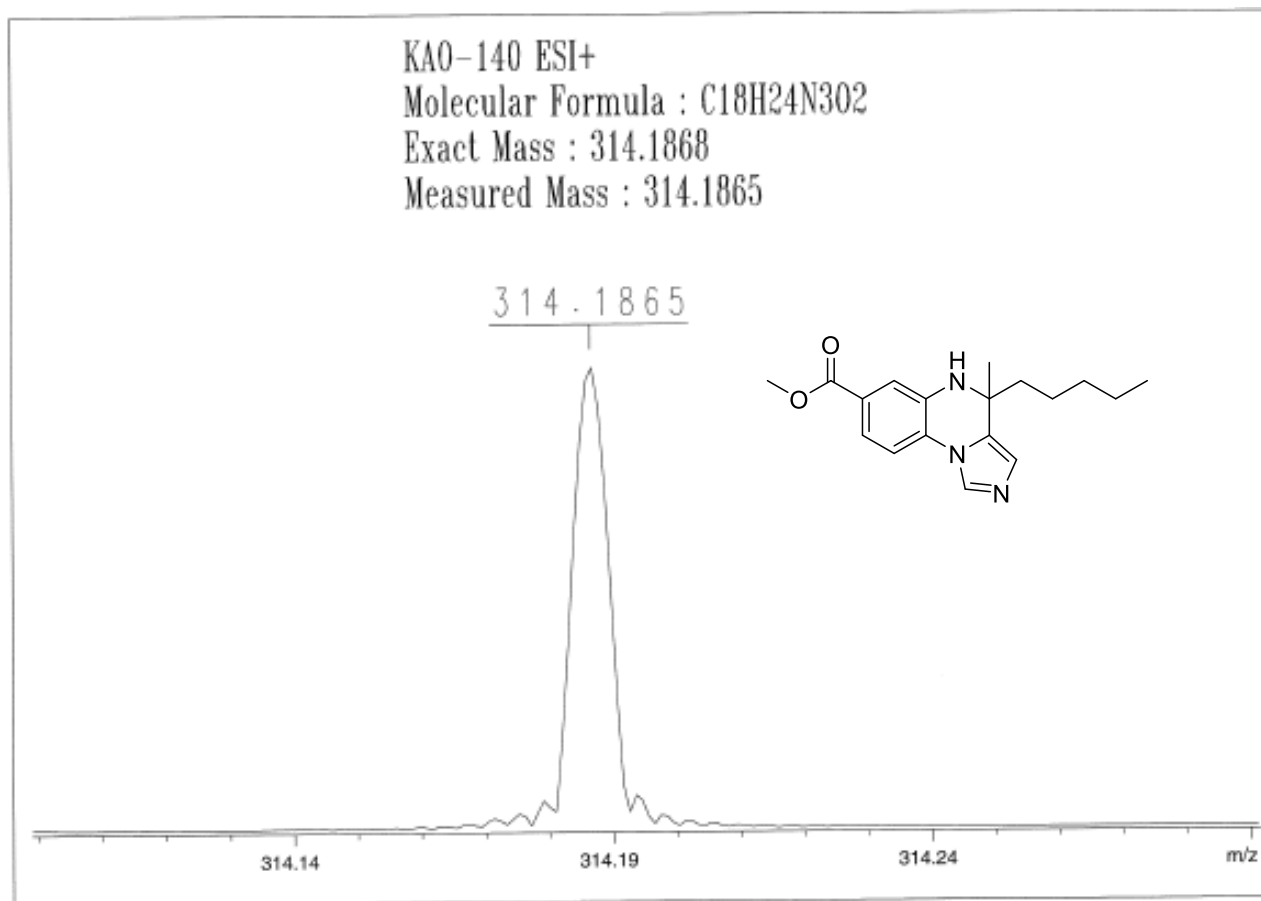

ESI-HRMS of compound **12f**

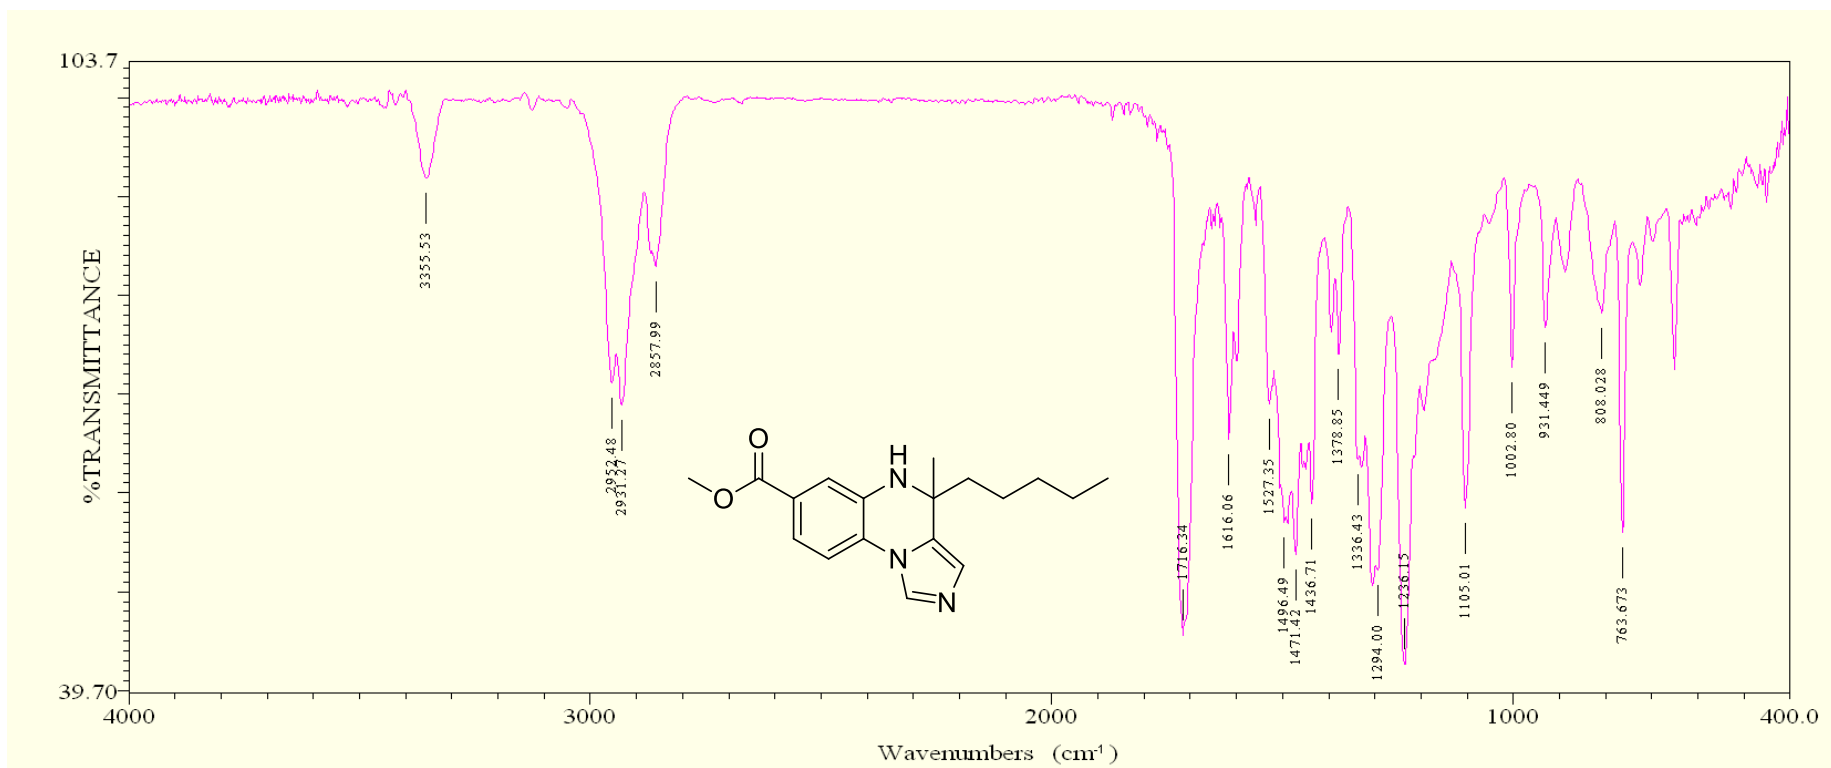

IR spectrum of compound **12f**

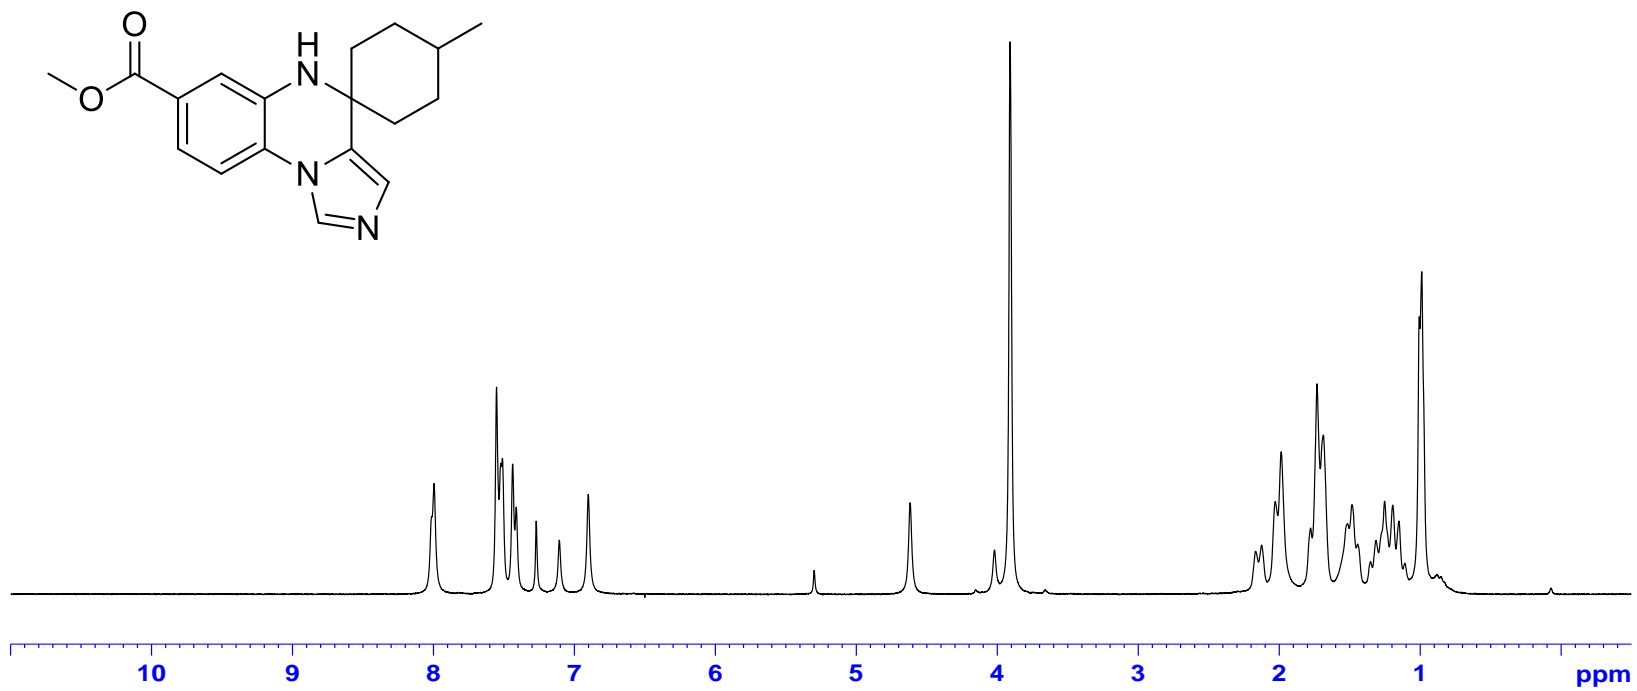

<sup>1</sup>H NMR spectrum (300 MHz) of compound **12g** in CDCl<sub>3</sub>



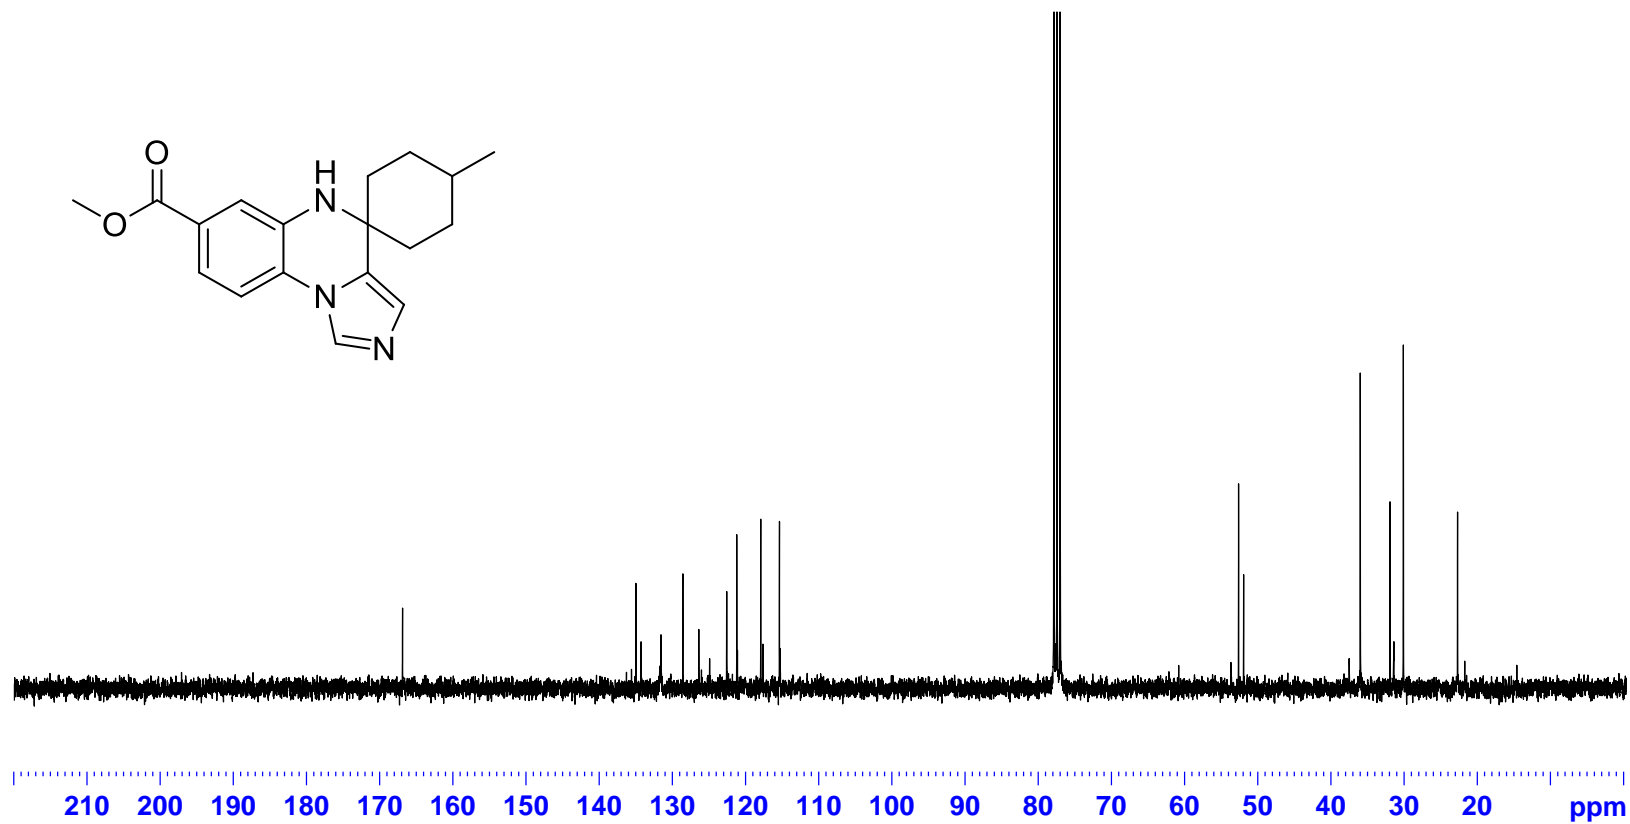

$^{13}\text{C}$  NMR spectrum (75 MHz) of compound **12g** in  $\text{CDCl}_3$

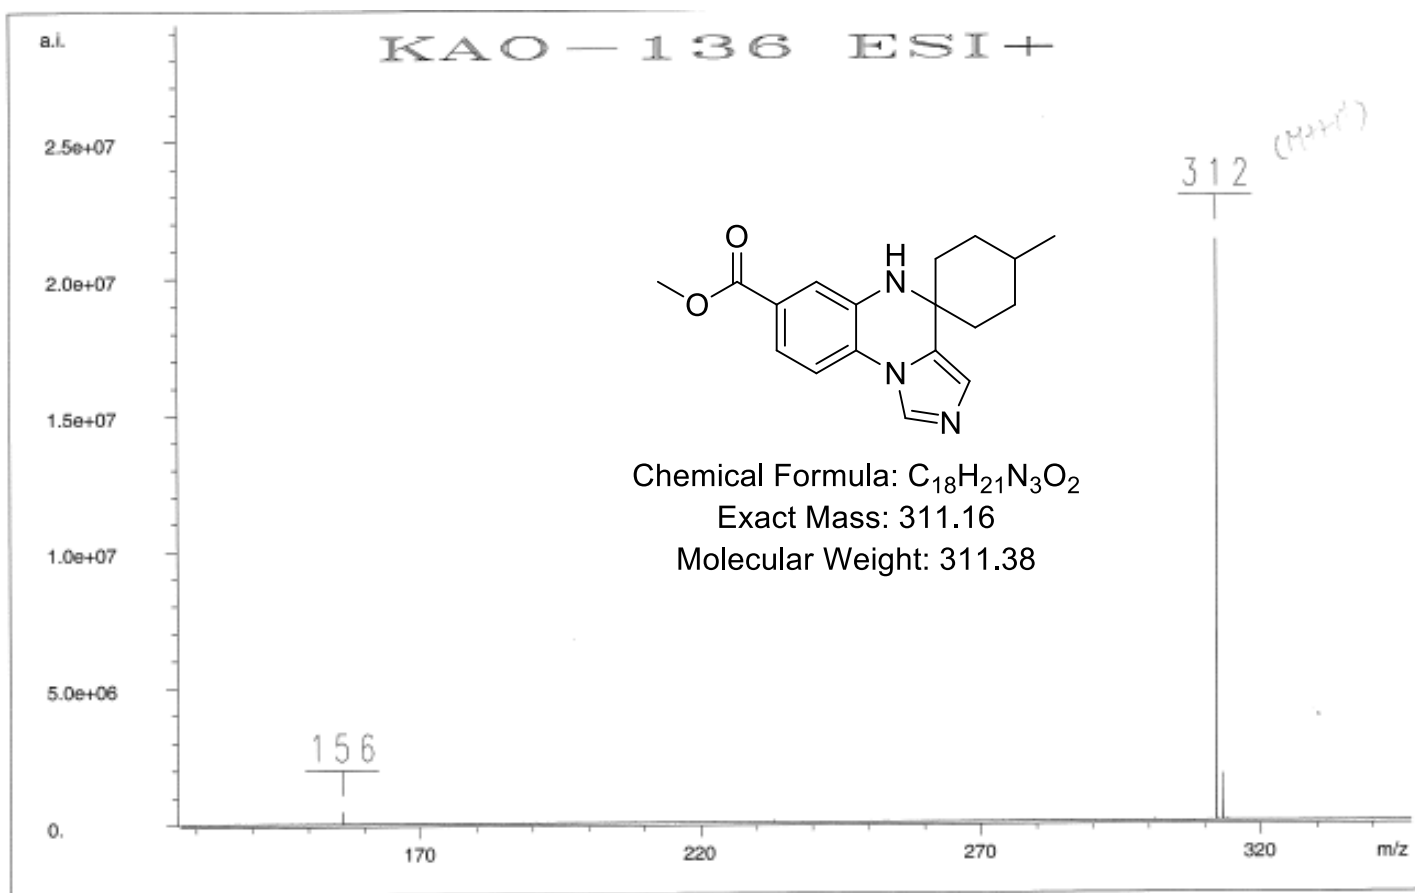

ESI-LRMS of compound **12g**

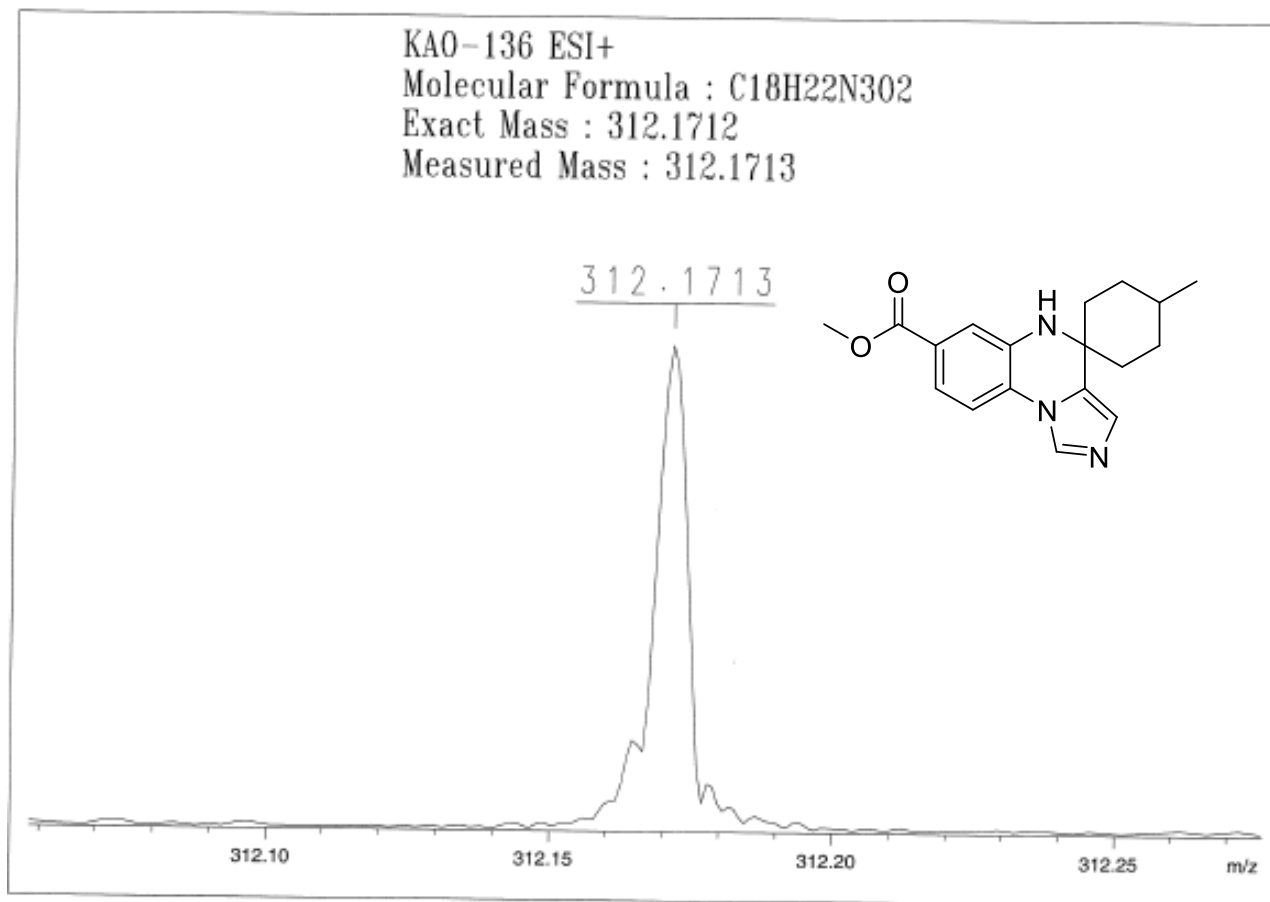

ESI-HRMS of compound **12g**

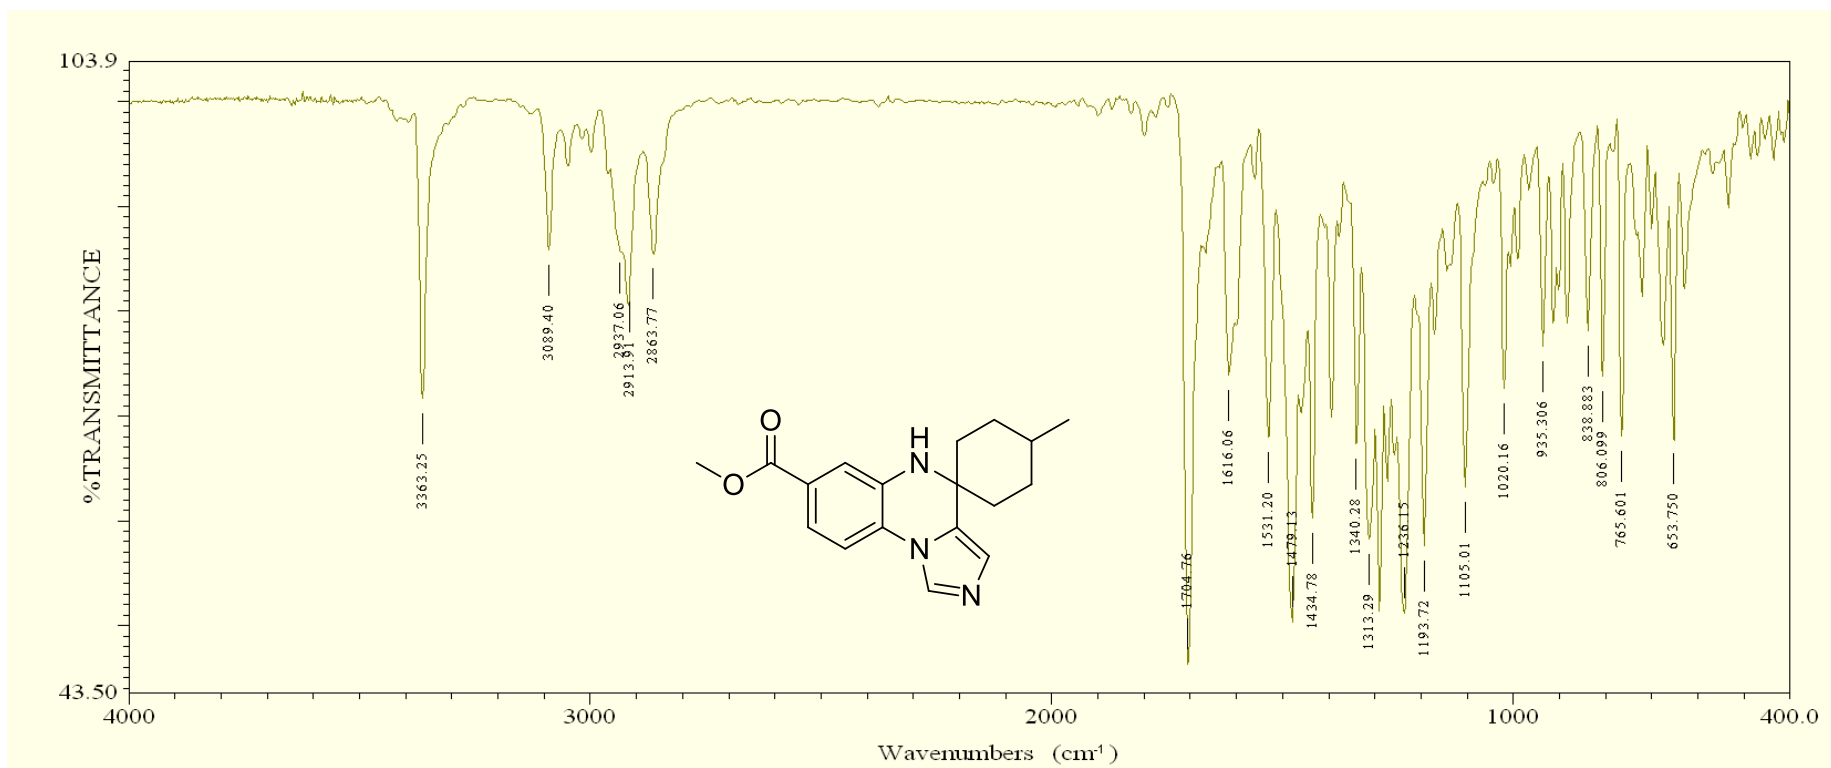

IR spectrum of compound **12g**

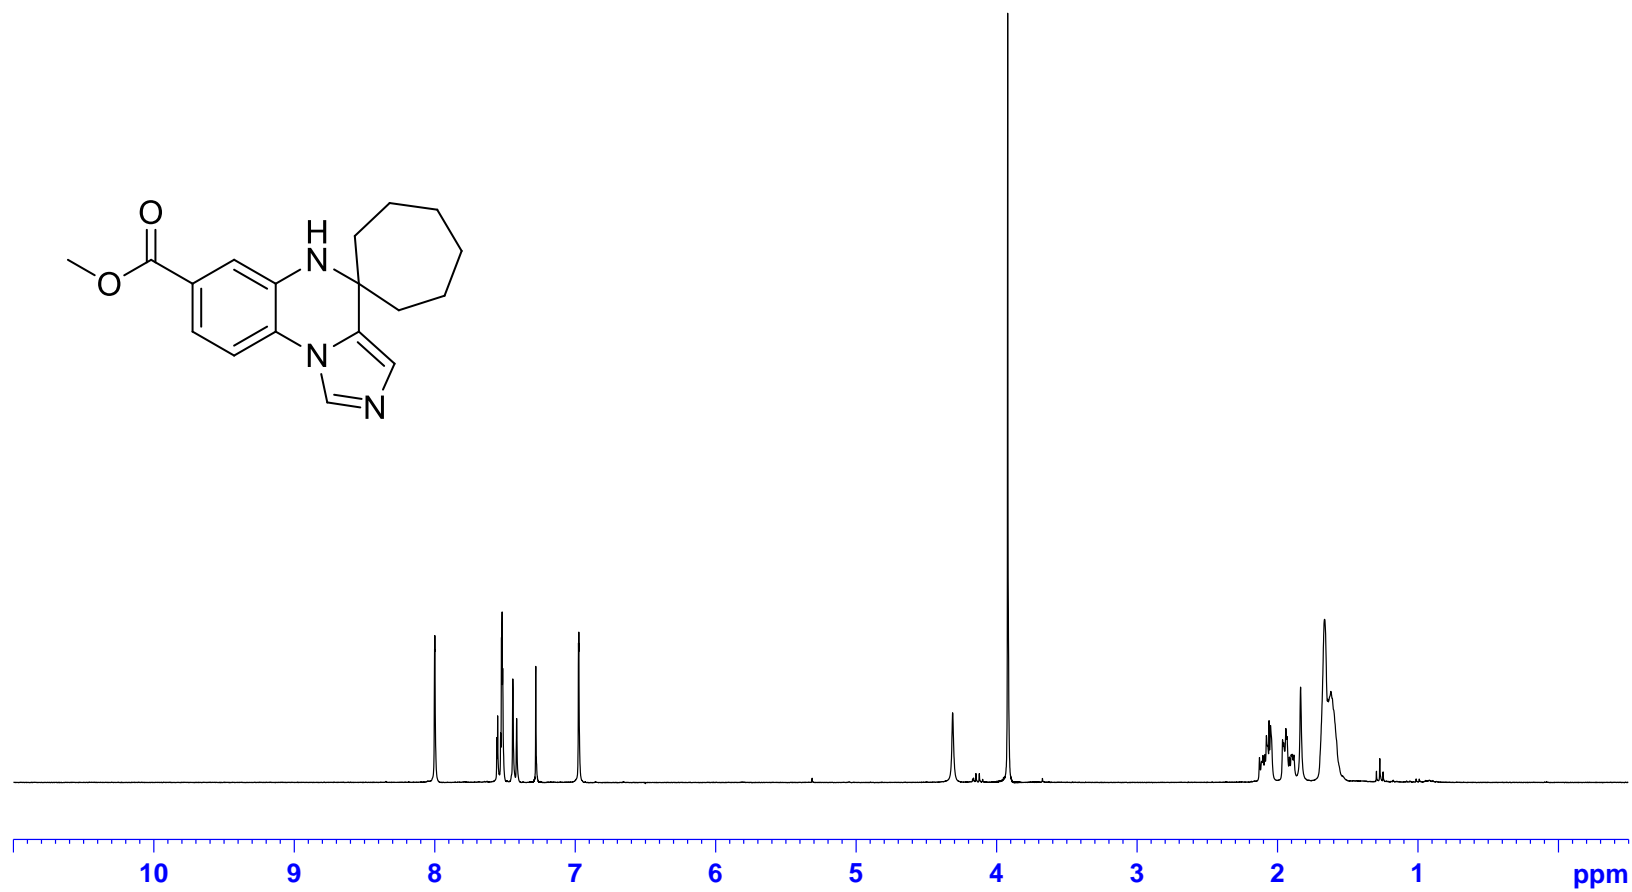

$^1\text{H}$  NMR spectrum (300 MHz) of compound **12h** in  $\text{CDCl}_3$

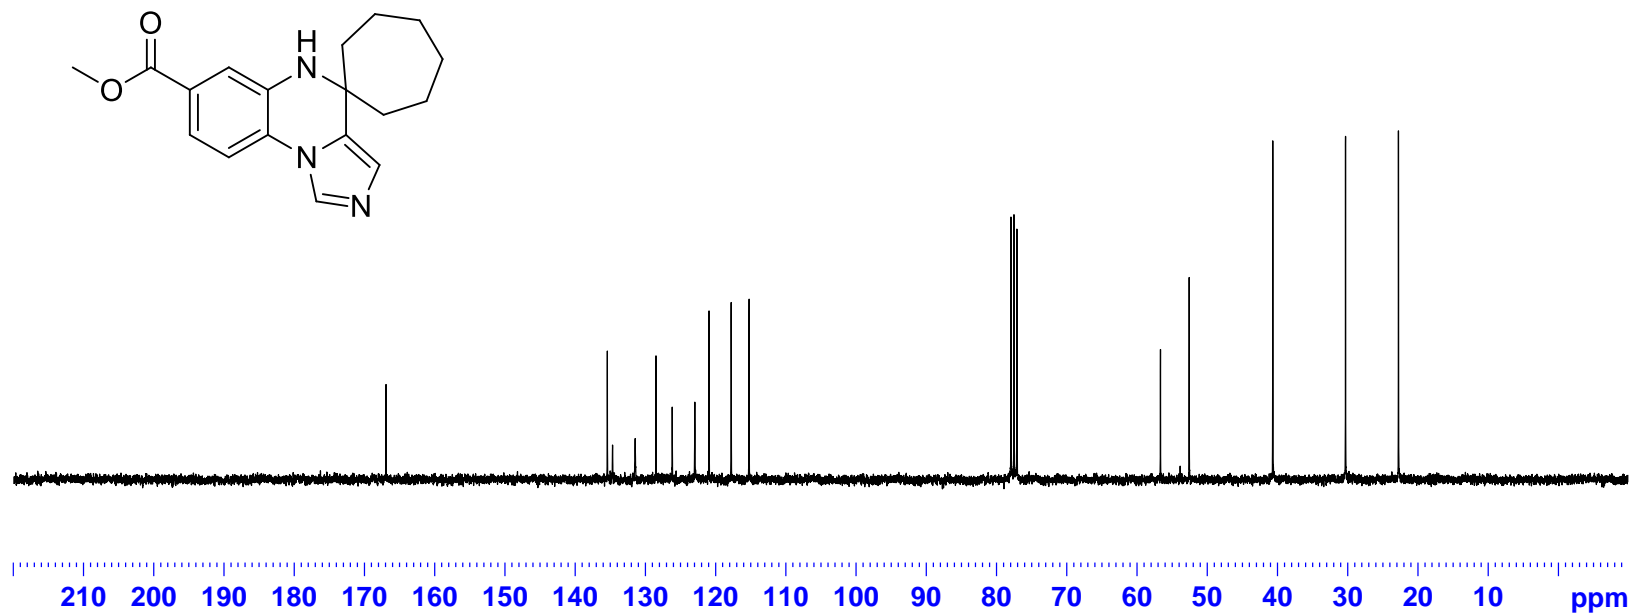

$^{13}\text{C}$  NMR spectrum (75 MHz) of compound **12h** in  $\text{CDCl}_3$

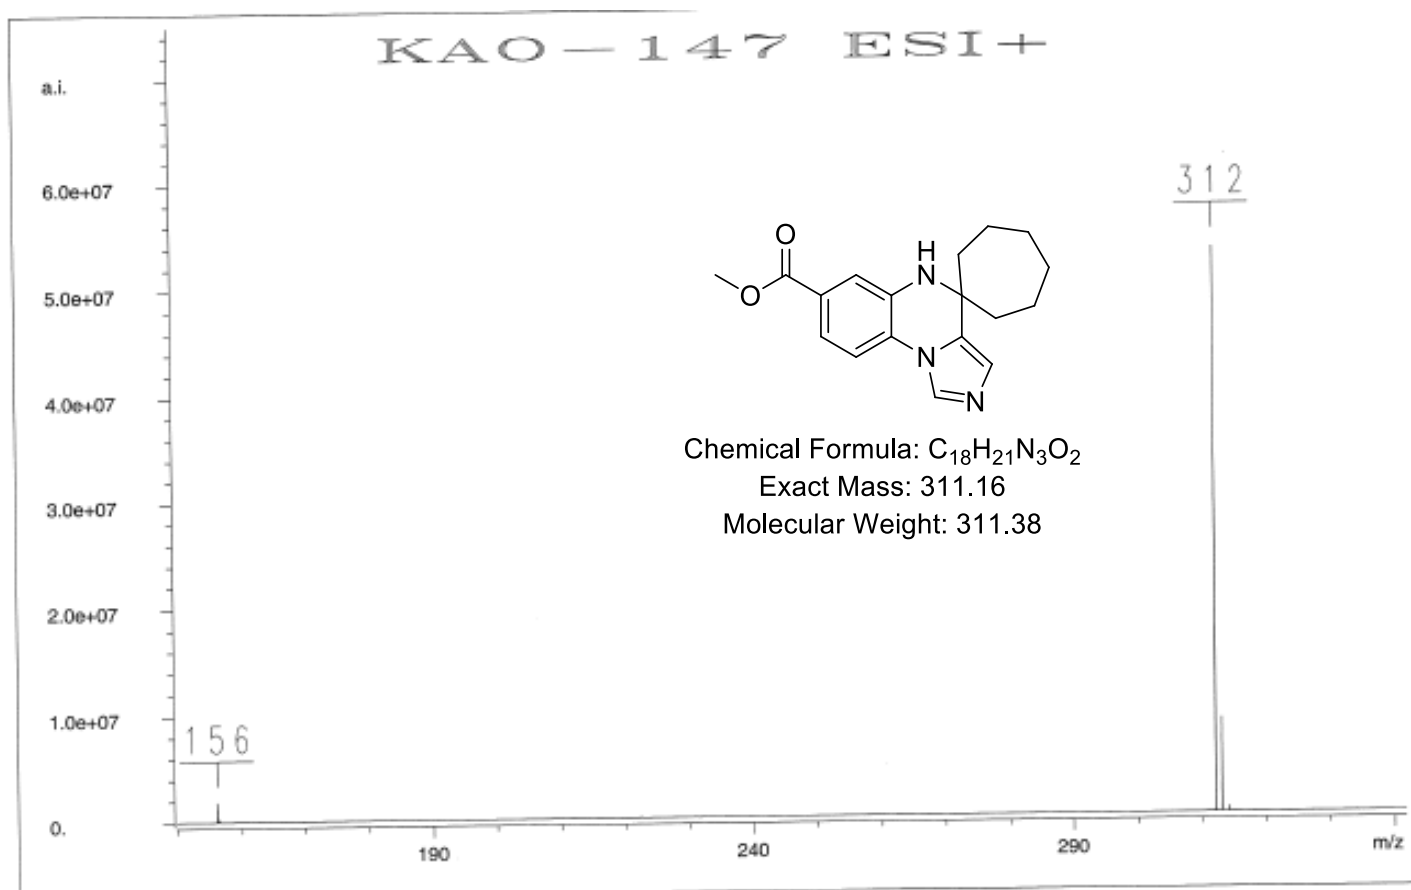

ESI-LRMS of compound **12h**

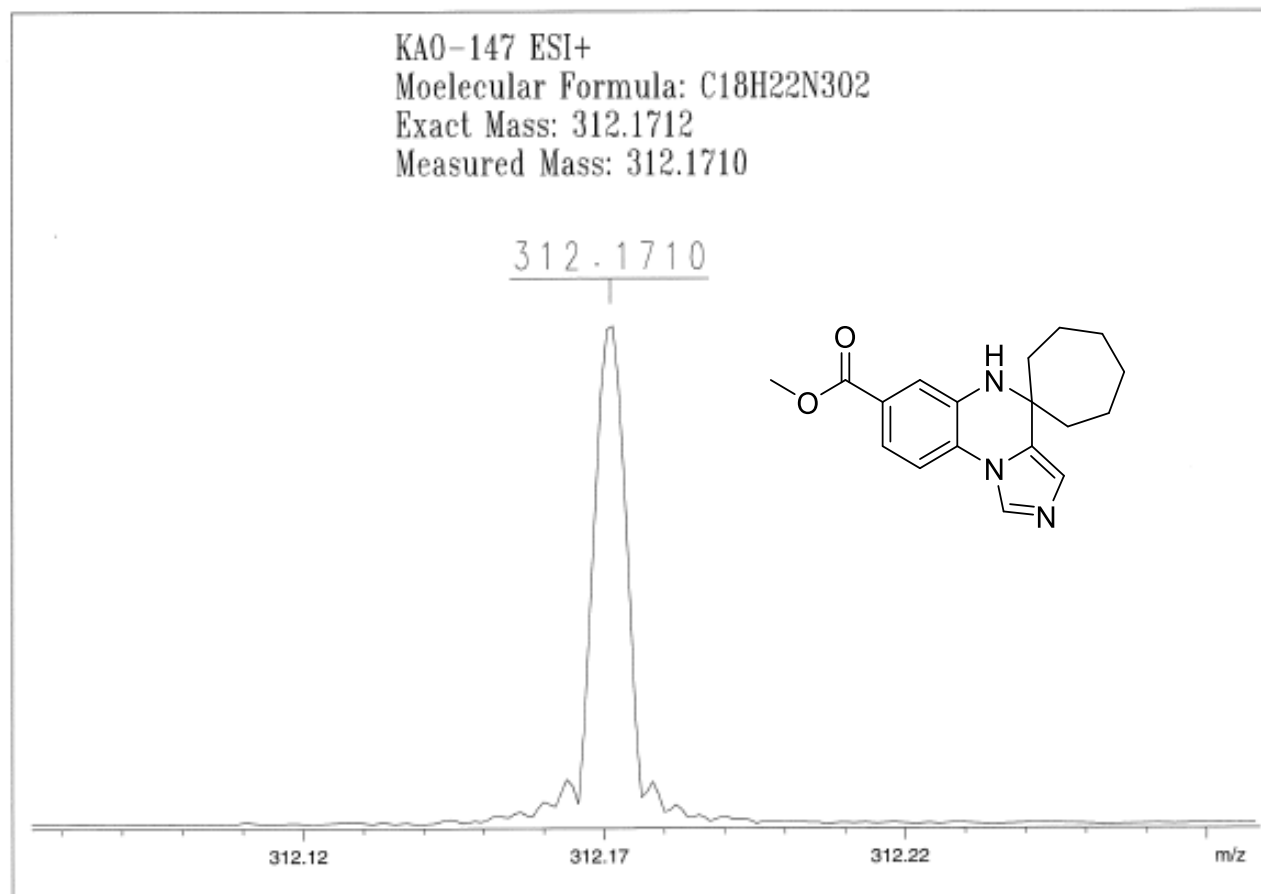

ESI-HRMS of compound **12h**



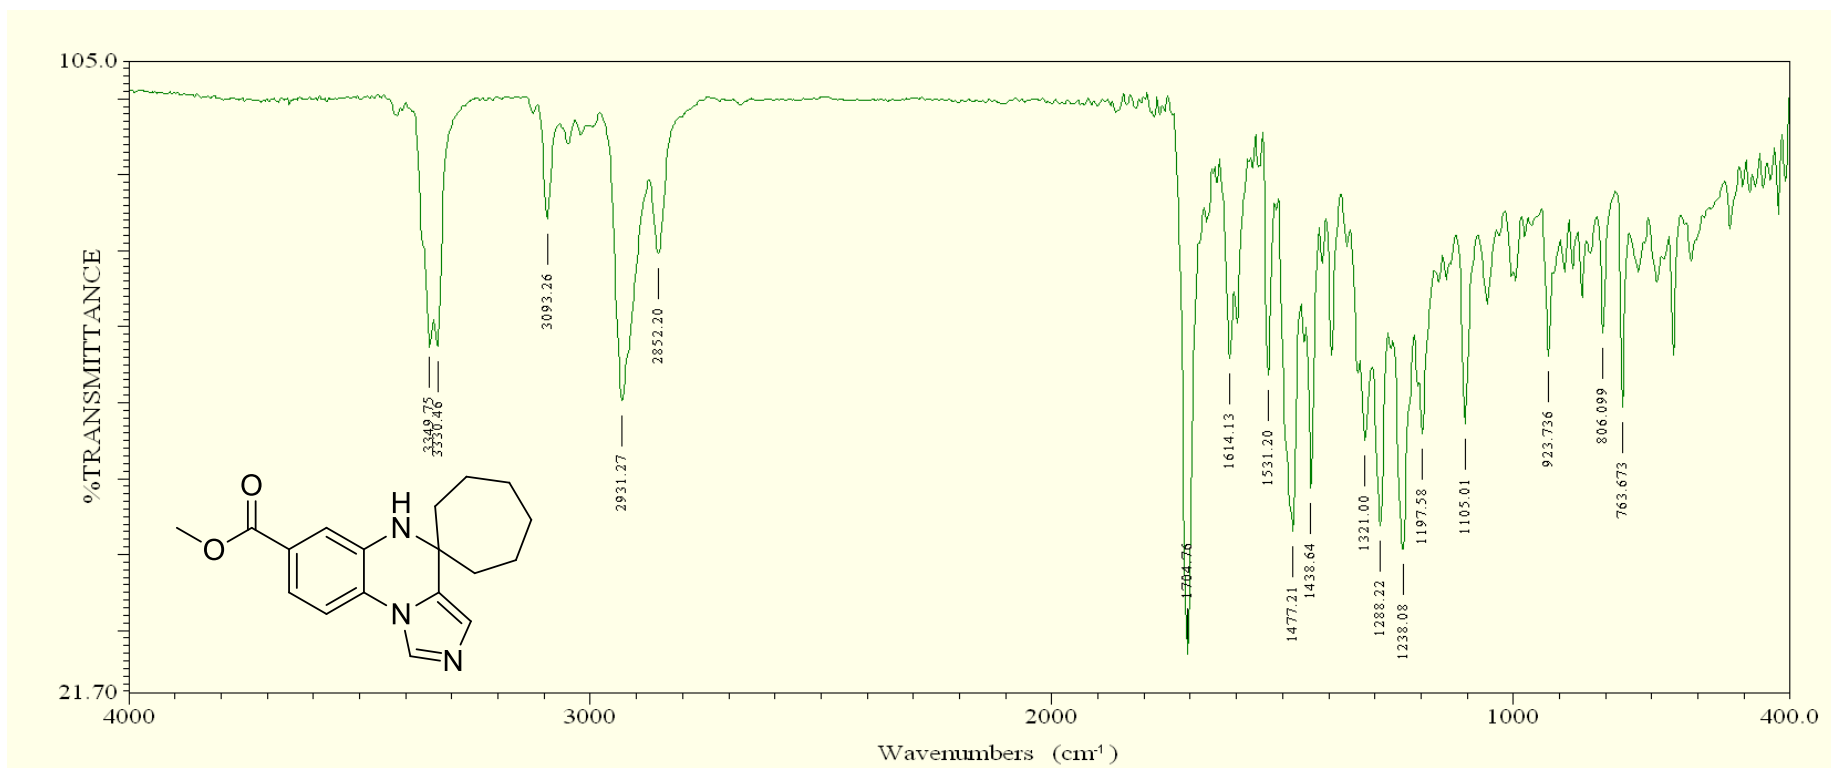

IR spectrum of compound **12h**

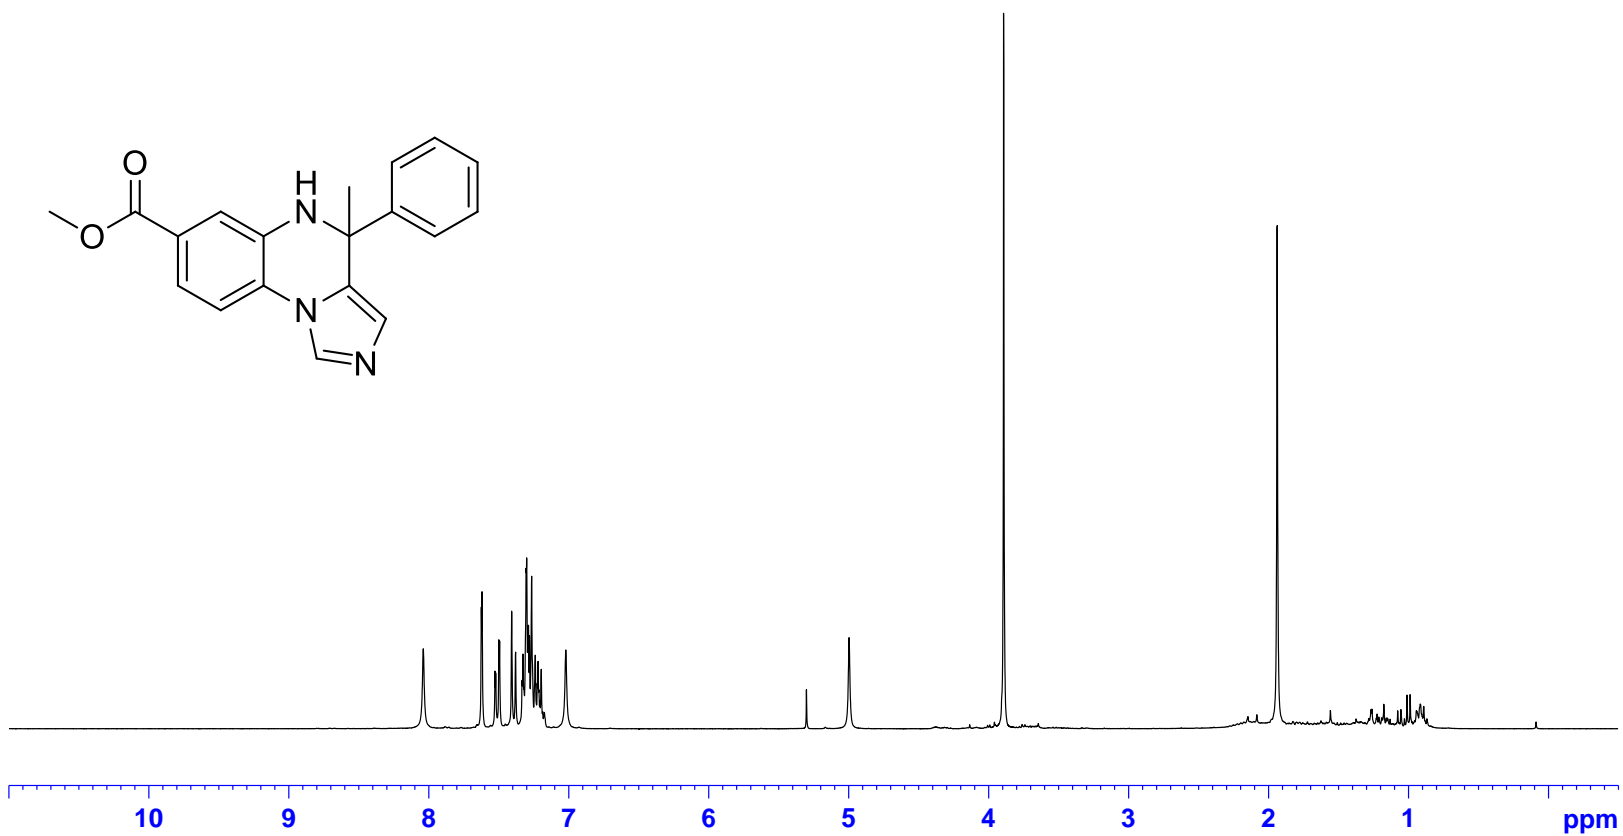

$^1\text{H}$  NMR spectrum (300 MHz) of compound **12i** in  $\text{CDCl}_3$

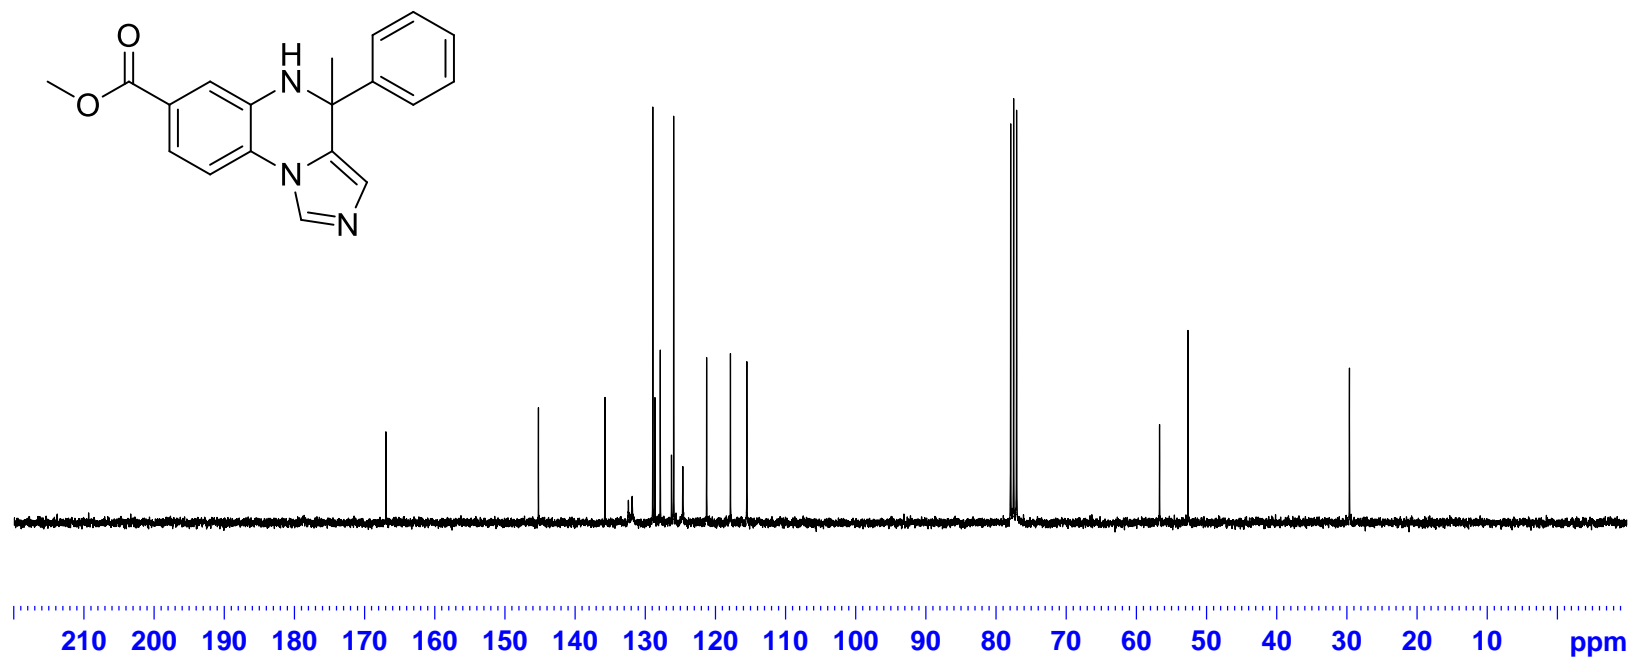

$^{13}\text{C}$  NMR spectrum (75 MHz) of compound **12i** in  $\text{CDCl}_3$

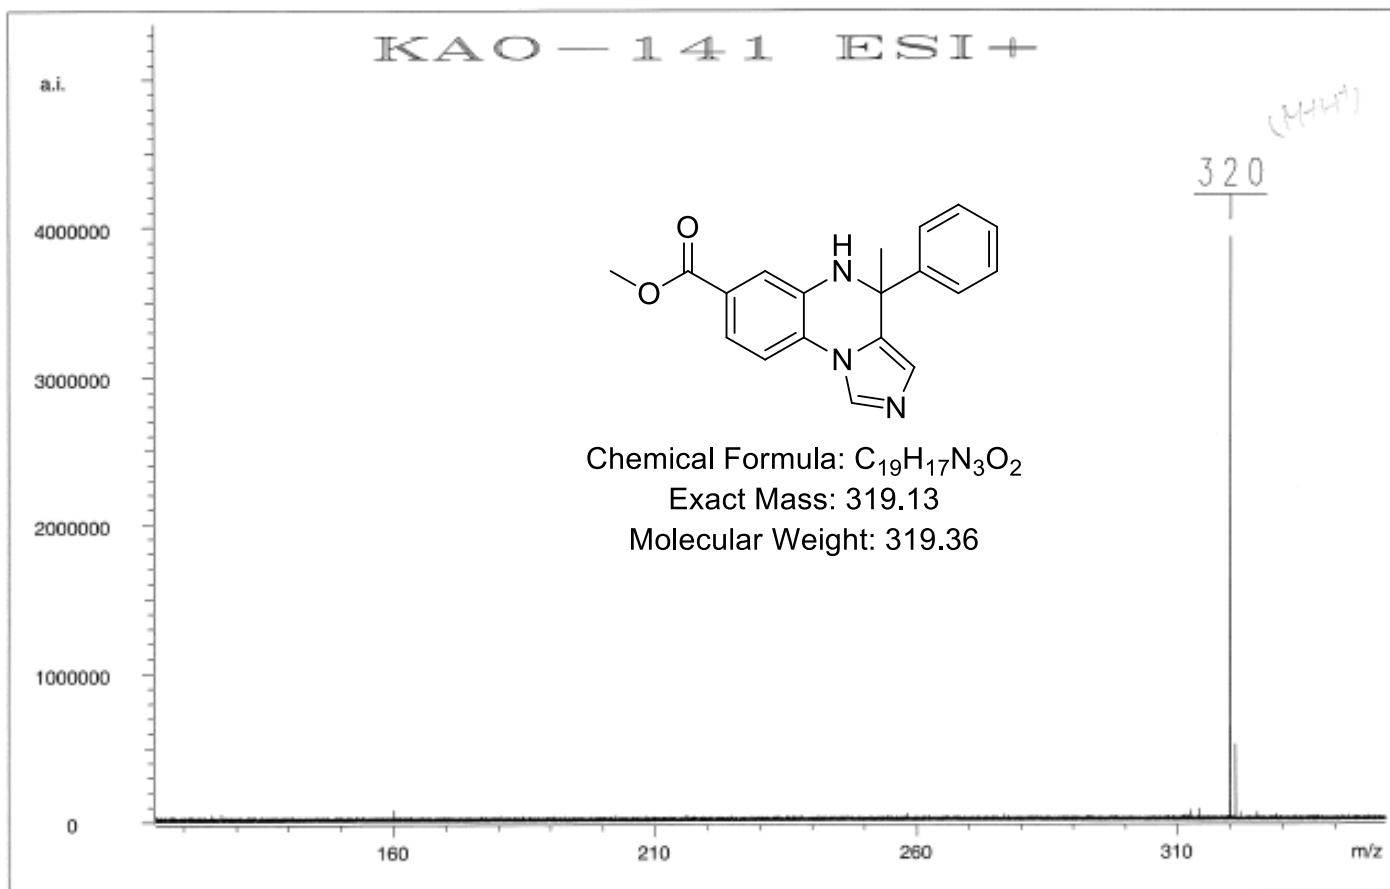

ESI-LRMS of compound **12i**

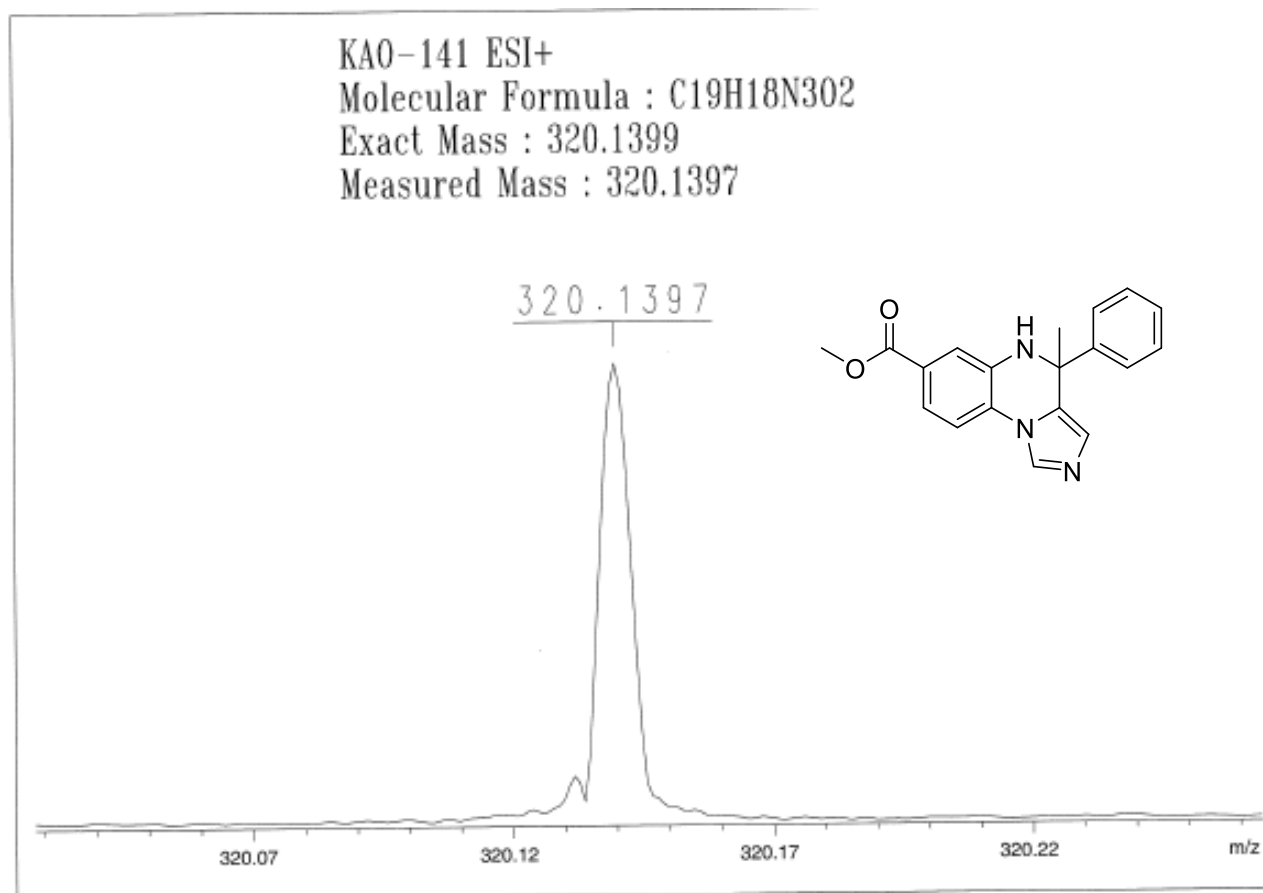

ESI-HRMS of compound **12i**

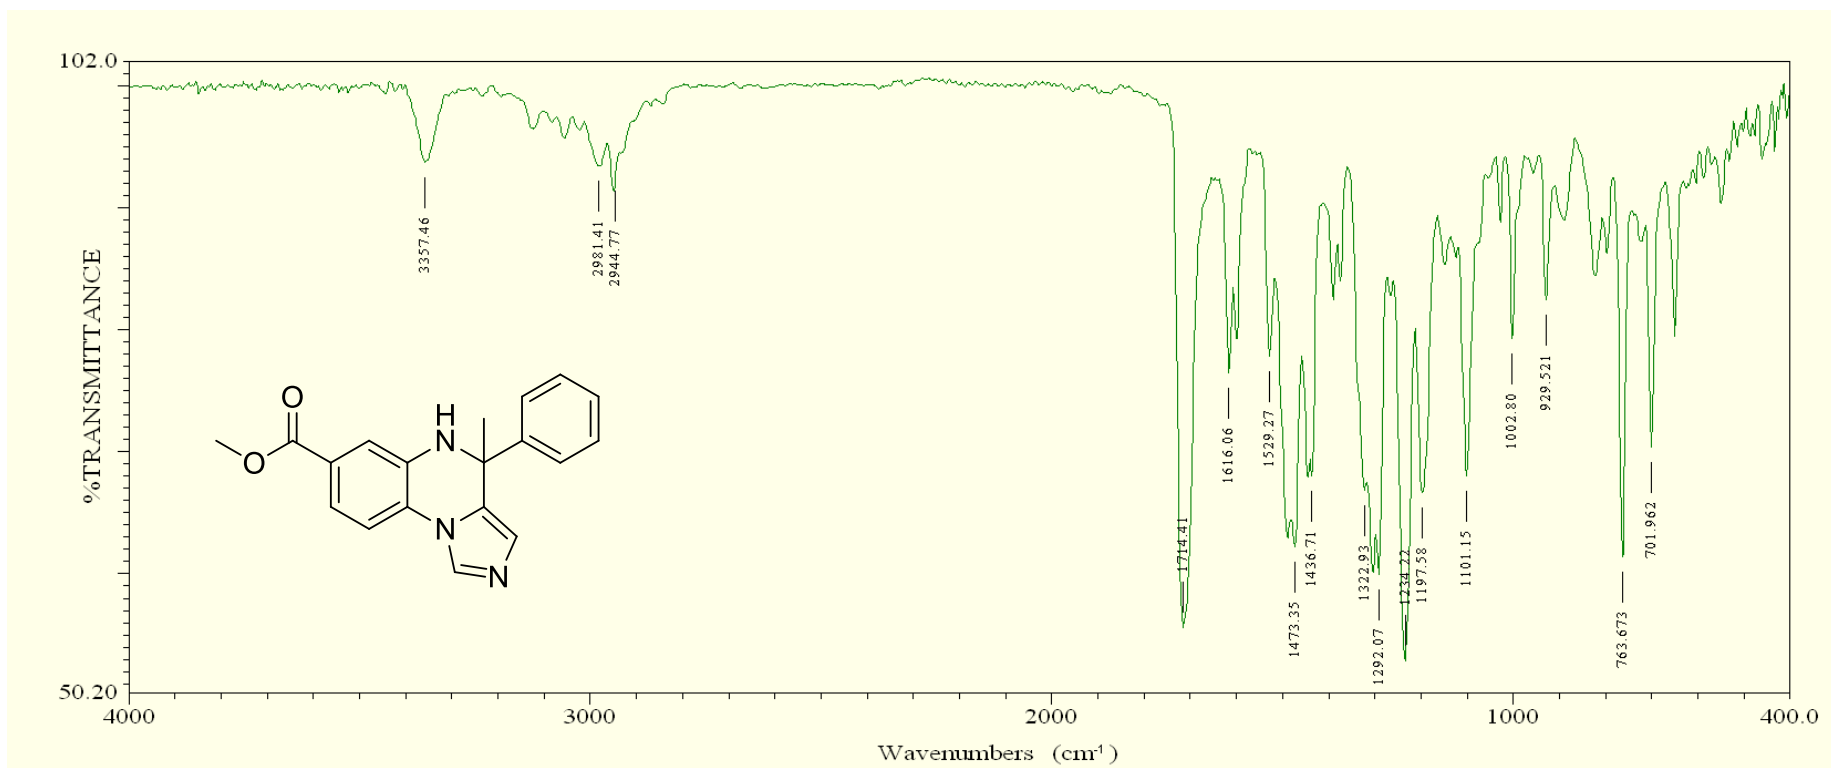

IR spectrum of compound **12i**

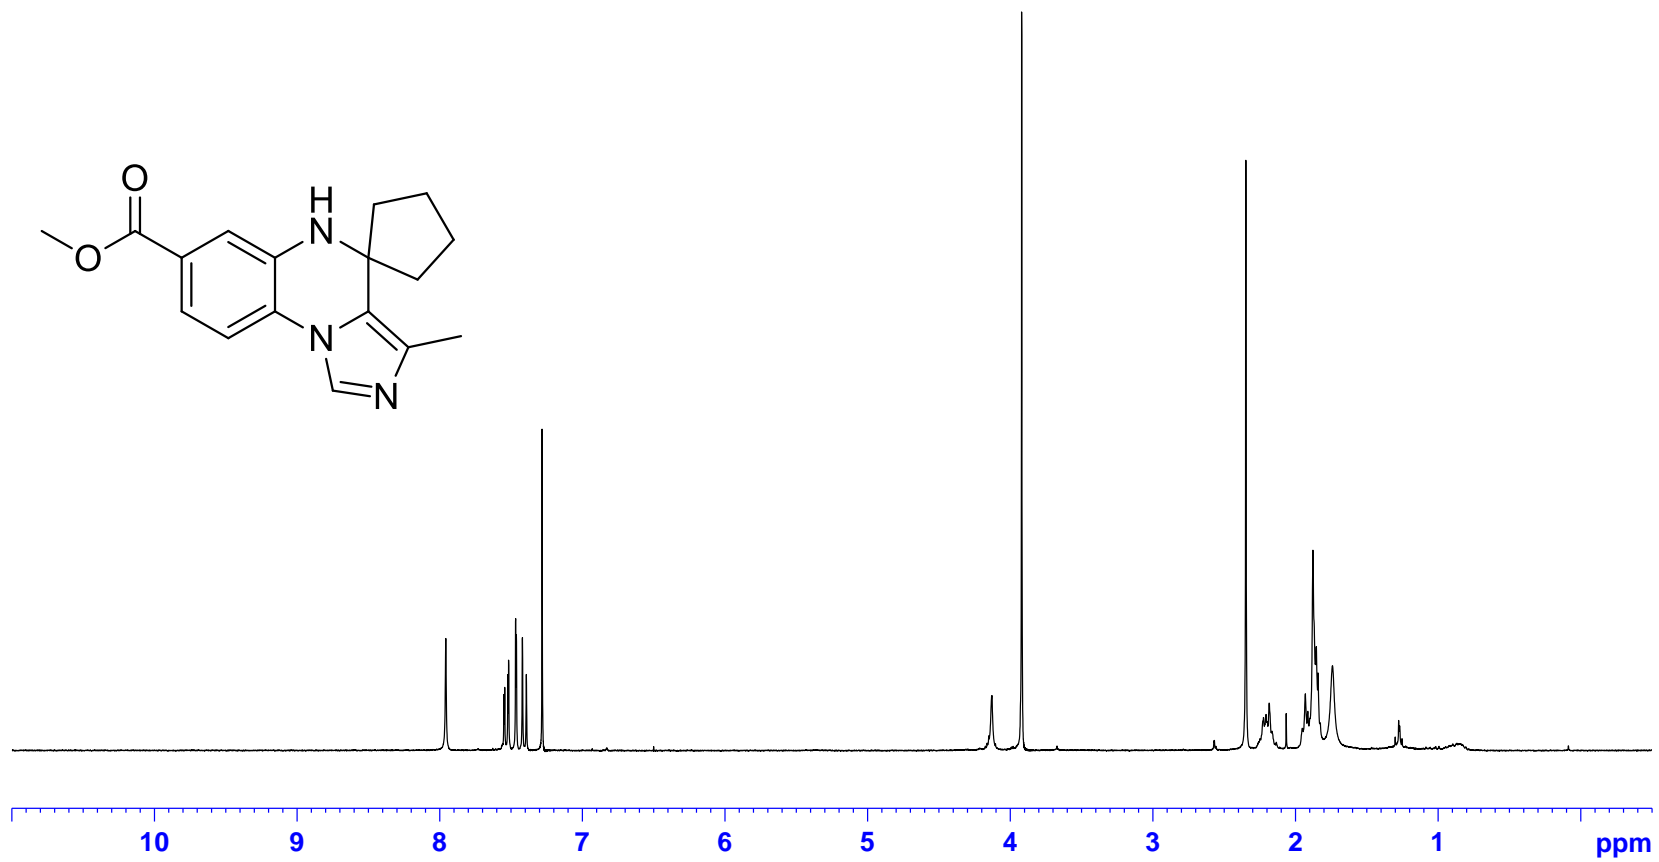

<sup>1</sup>H NMR spectrum (300 MHz) of compound **12j** in CDCl<sub>3</sub>

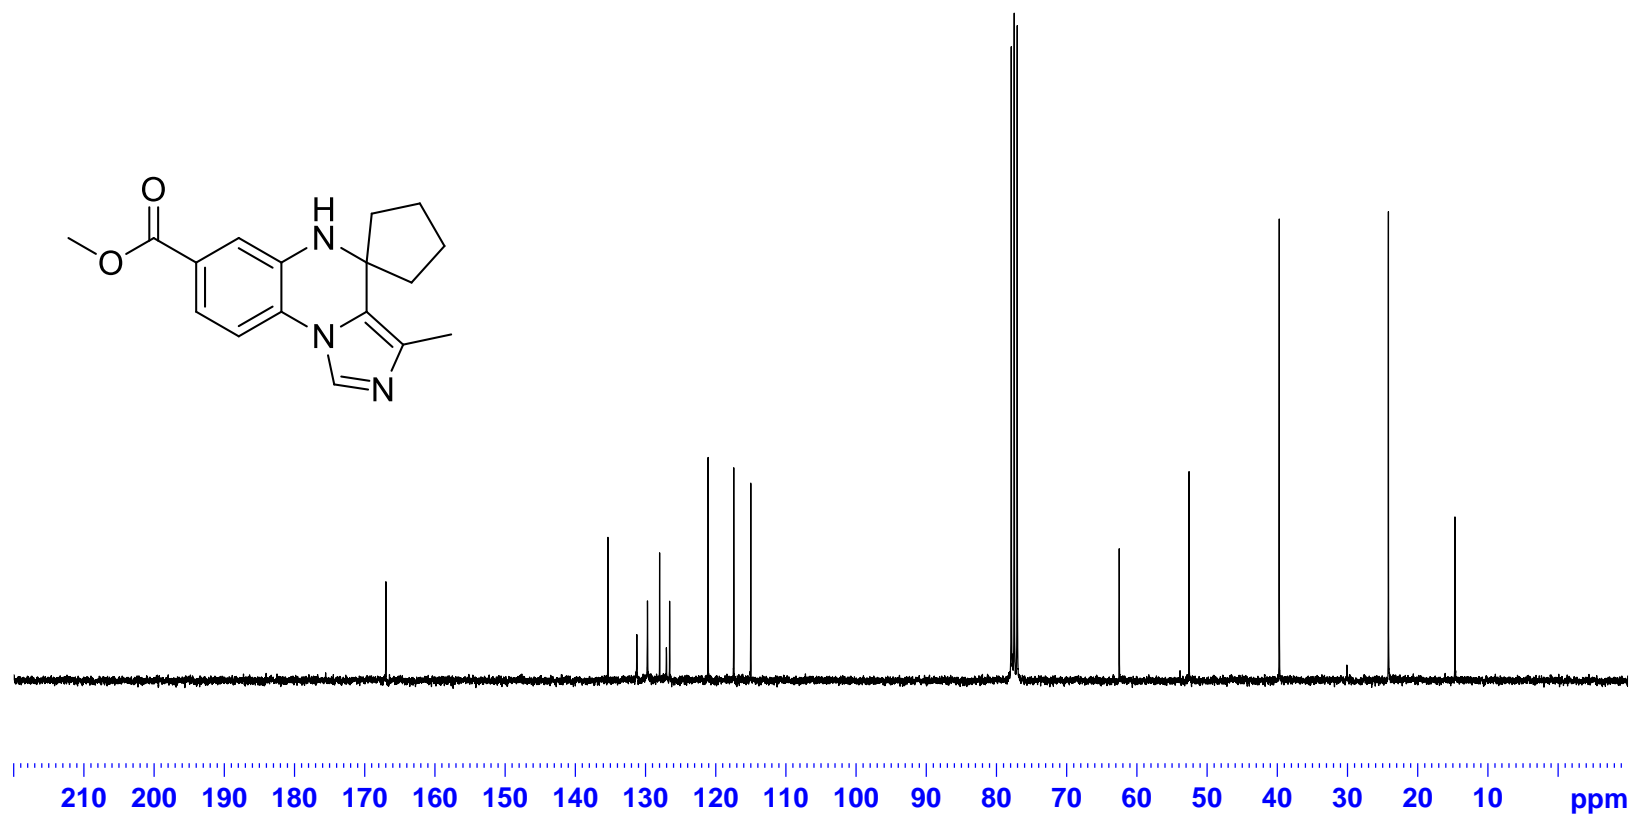

$^{13}\text{C}$  NMR spectrum (75 MHz) of compound **12j** in  $\text{CDCl}_3$



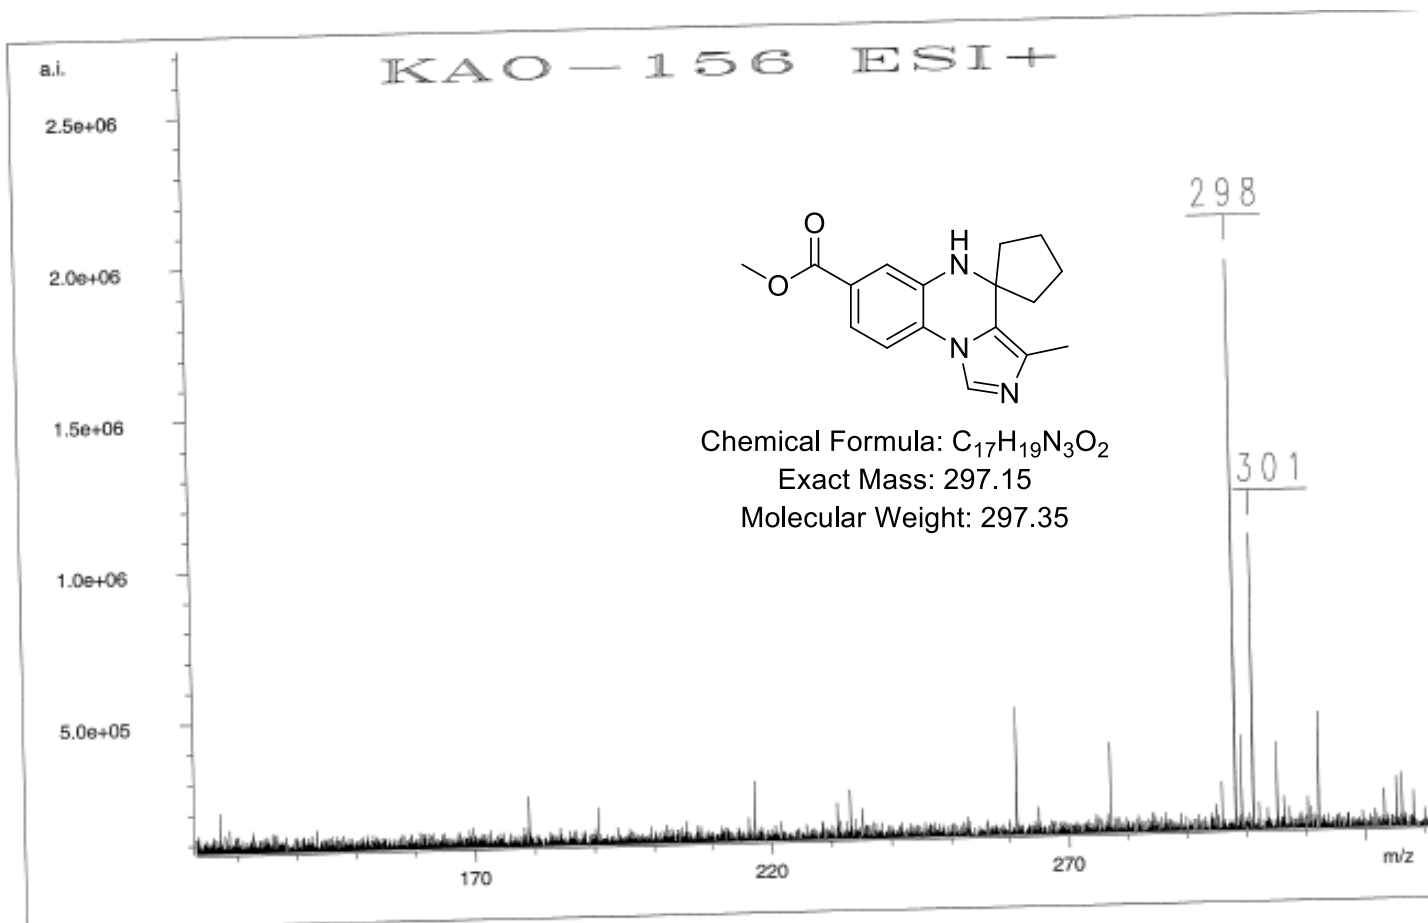

ESI-LRMS of compound **12j**

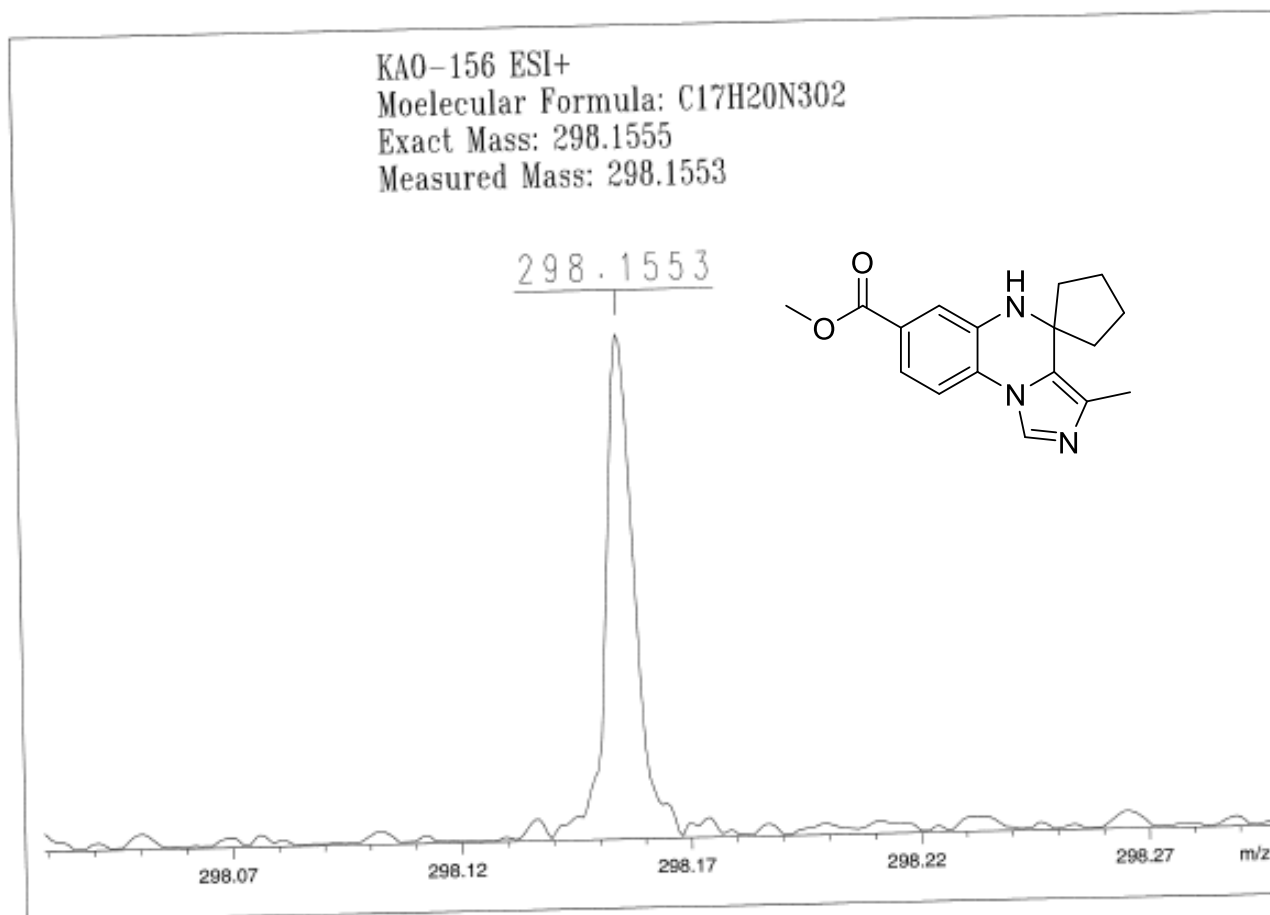

ESI-HRMS of compound **12j**

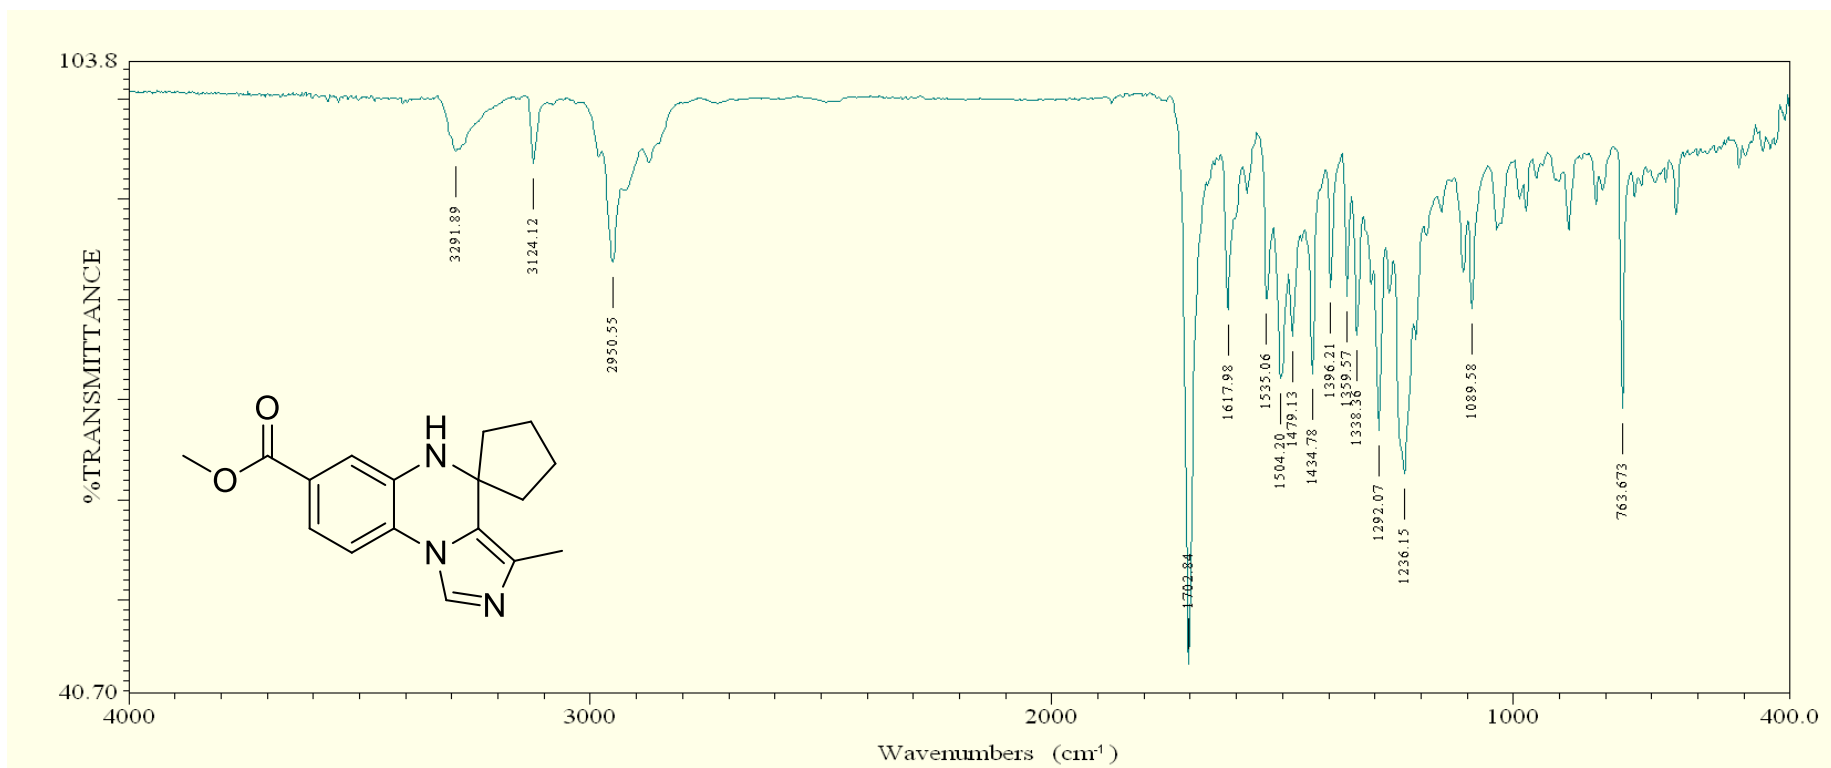

IR spectrum of compound **12j**

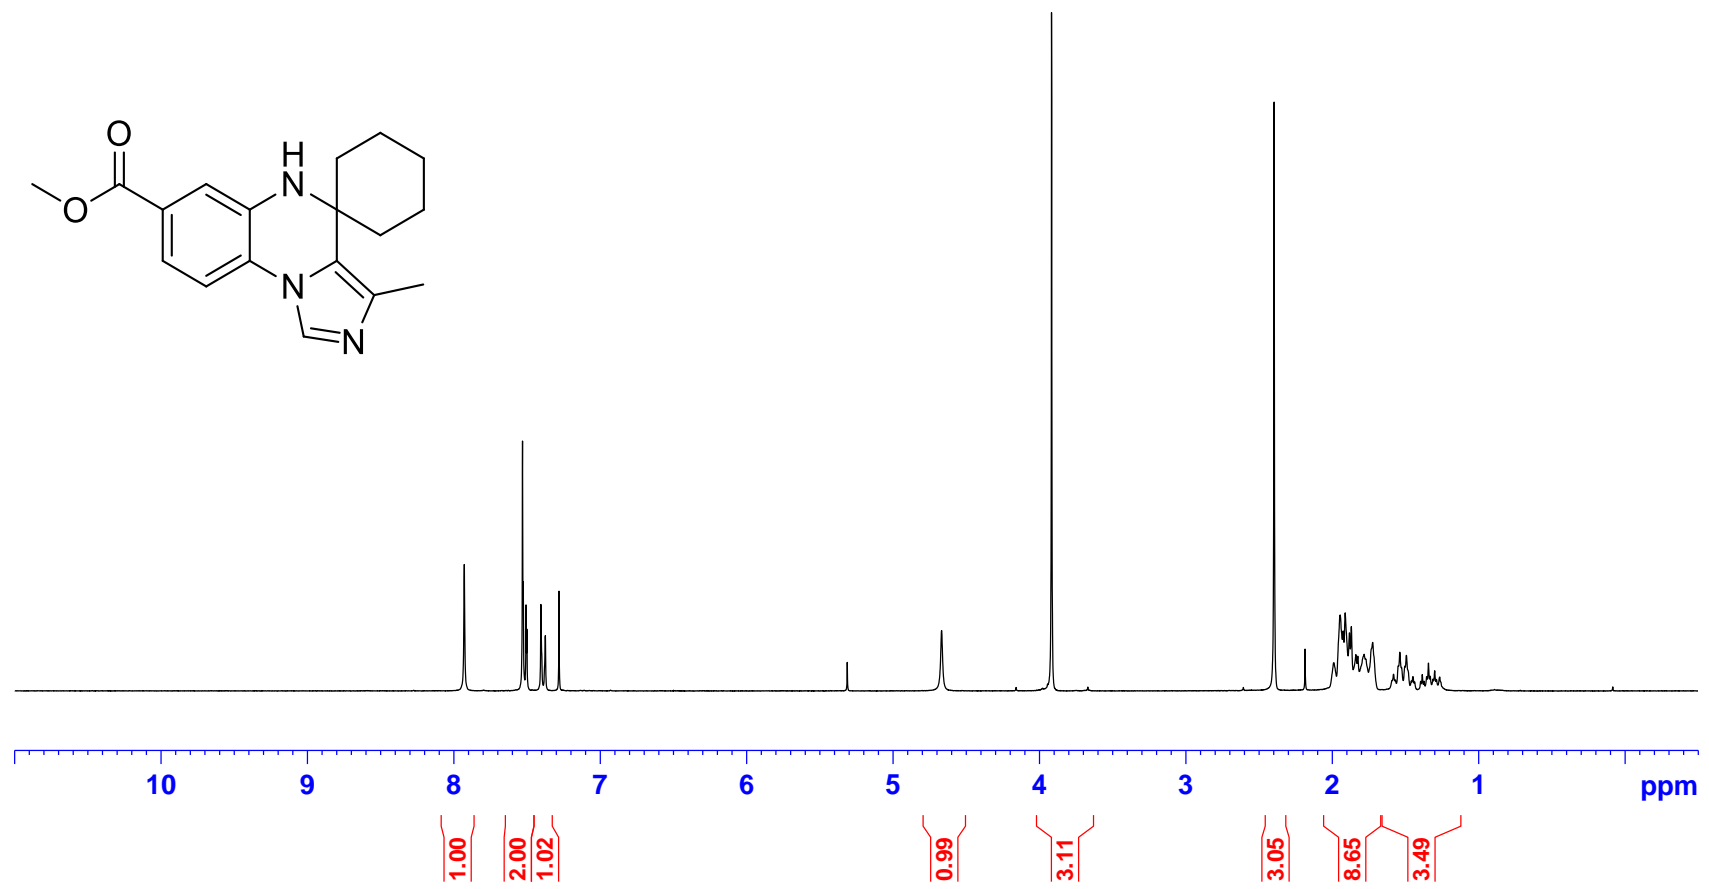

<sup>1</sup>H NMR spectrum (300 MHz) of compound **12k** in CDCl<sub>3</sub>

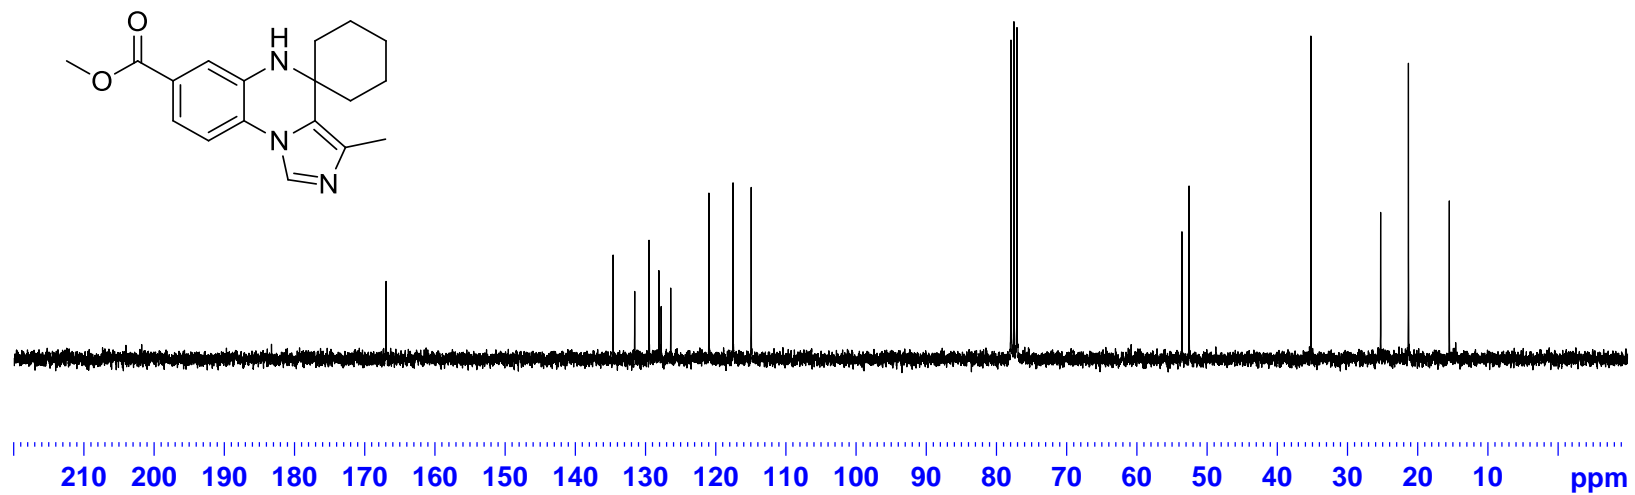

$^{13}\text{C}$  NMR spectrum (75 MHz) of compound **12k** in  $\text{CDCl}_3$

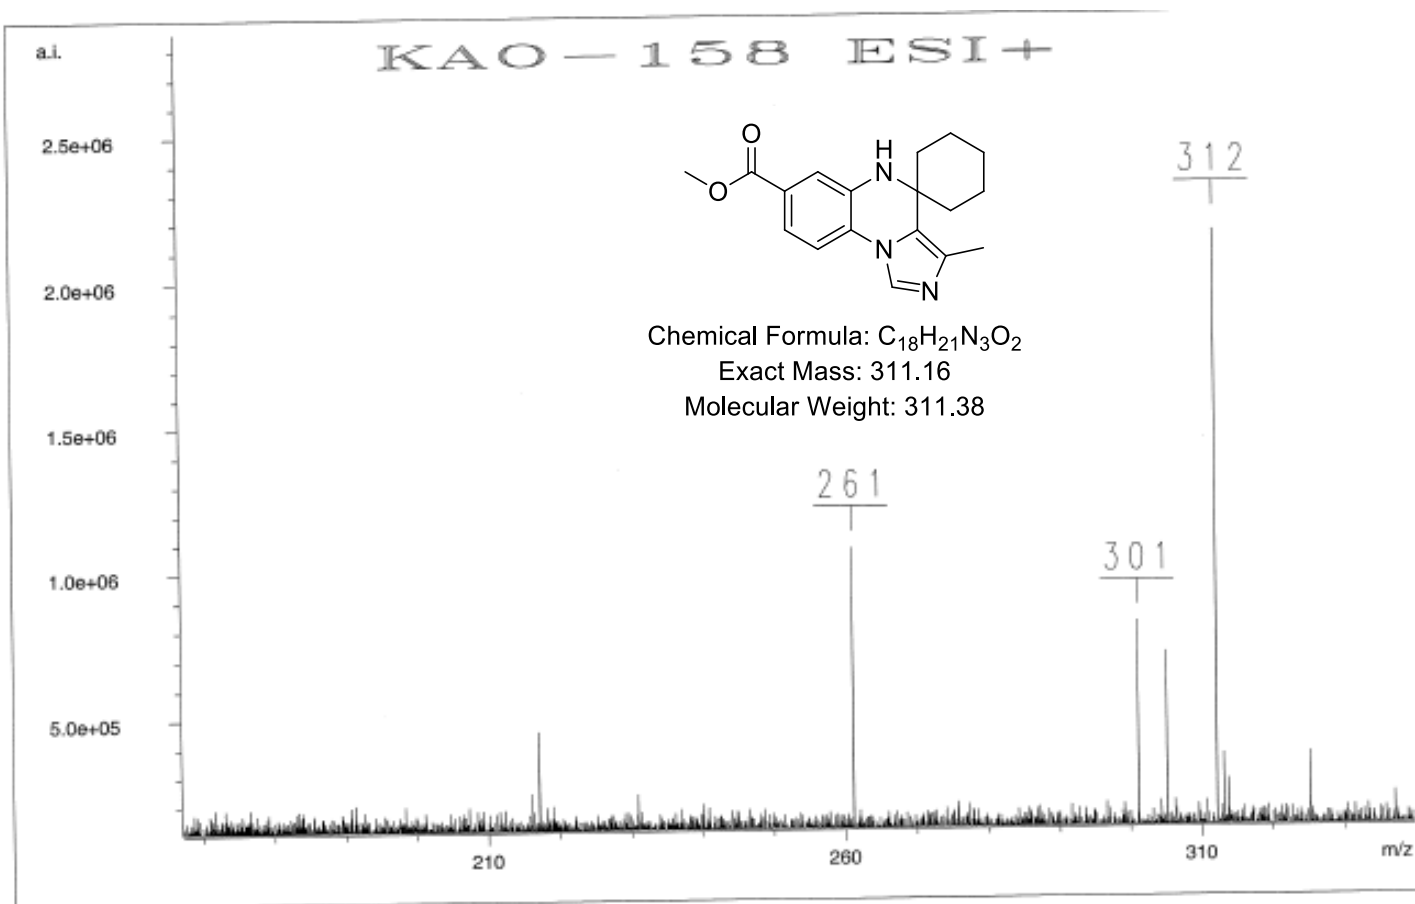

ESI-LRMS of compound **12k**

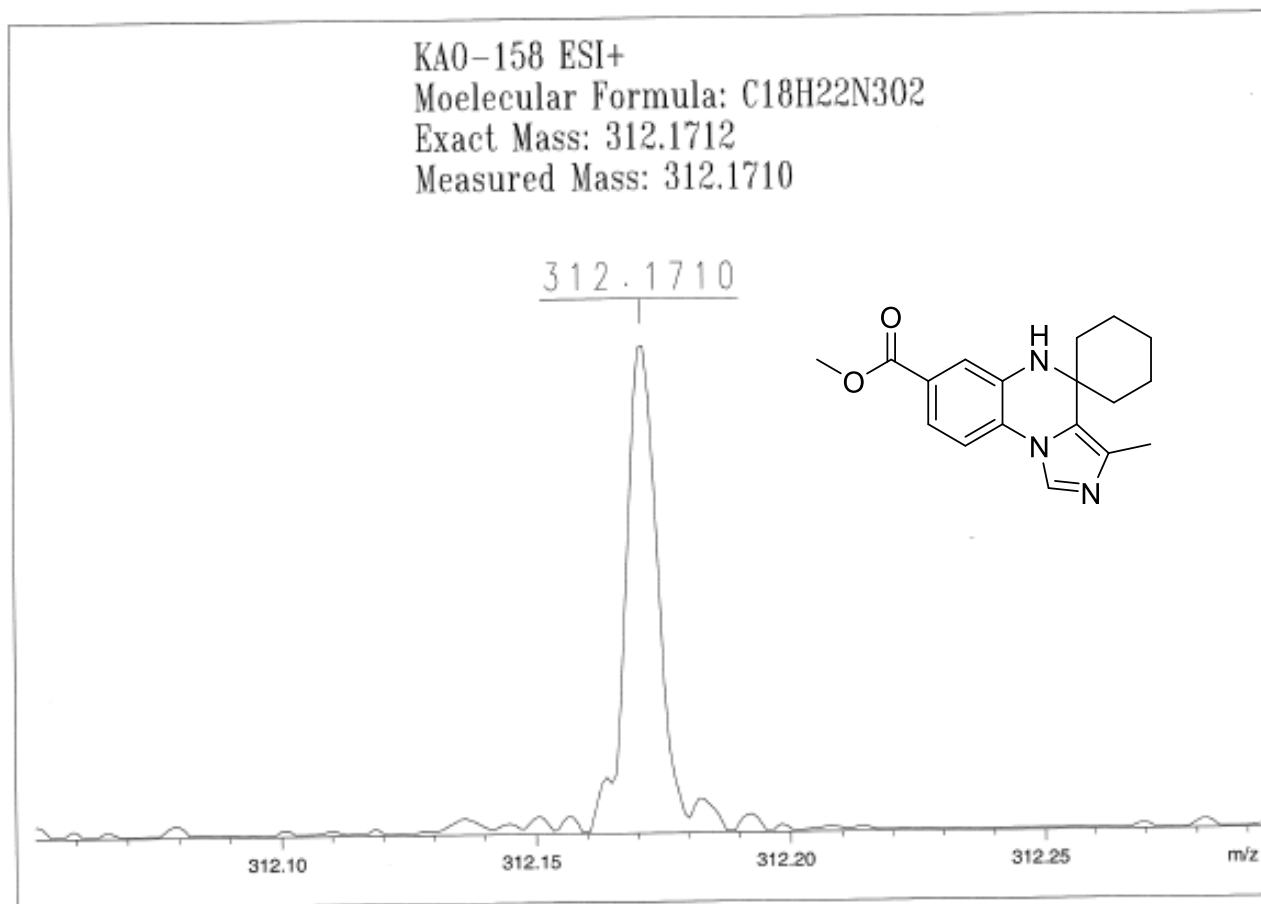

ESI-HRMS of compound **12k**

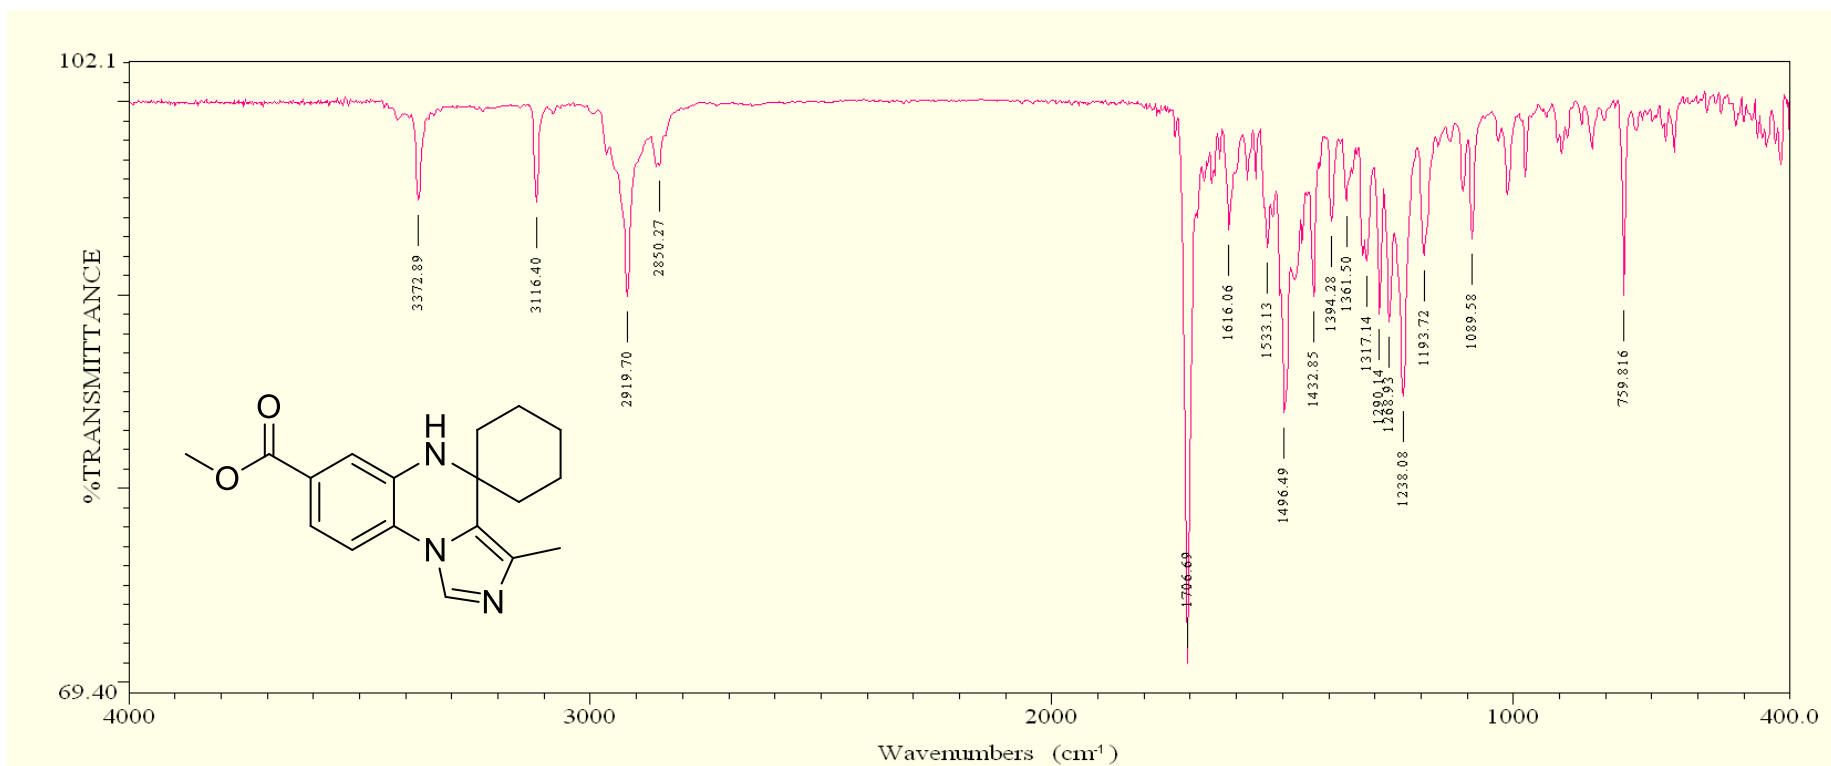

IR spectrum of compound **12k**



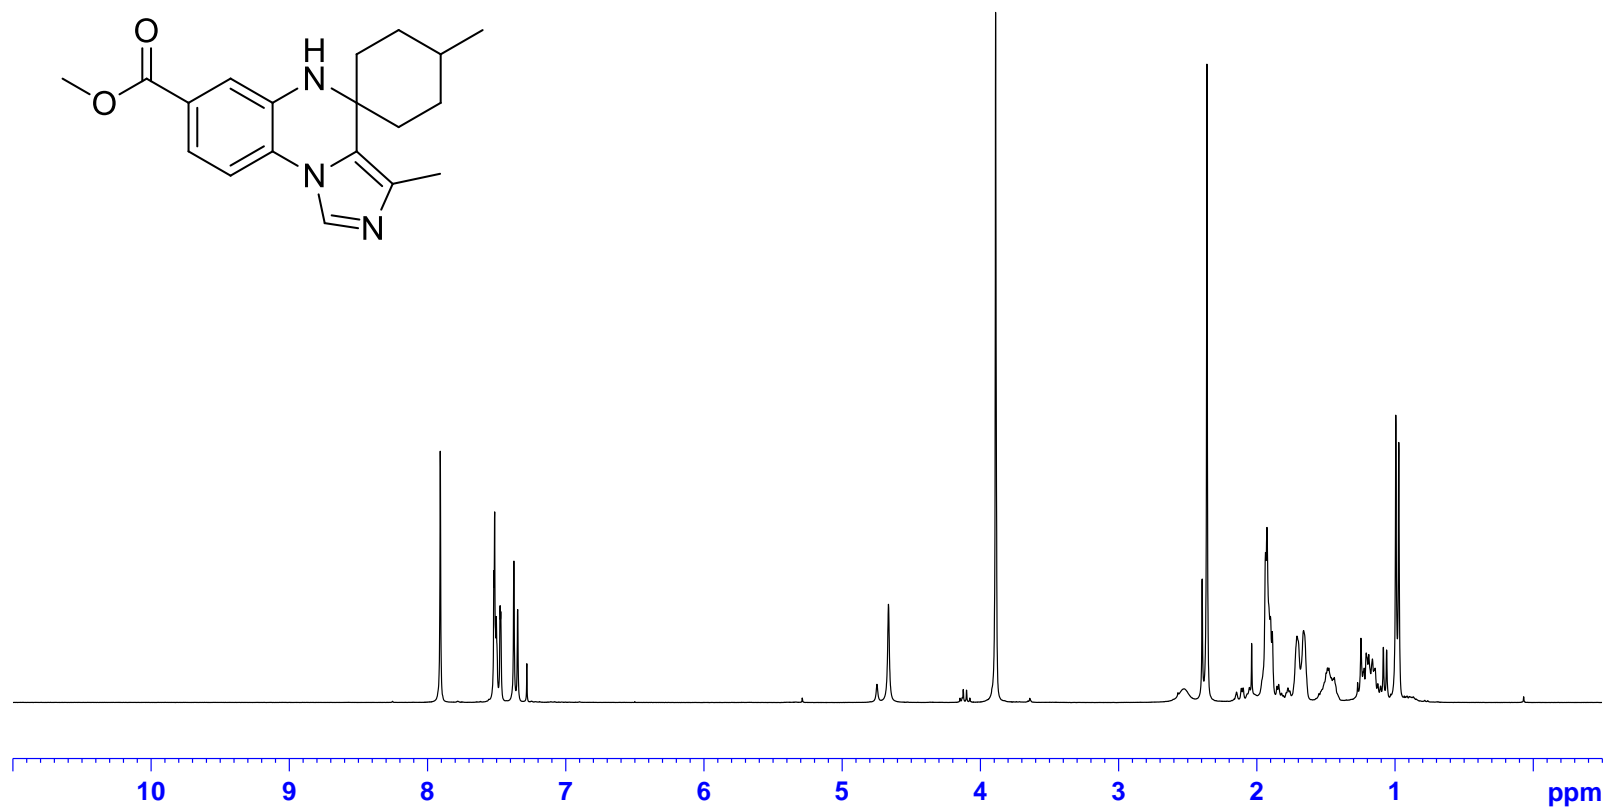

$^1\text{H}$  NMR spectrum (300 MHz) of compound **12l** in  $\text{CDCl}_3$

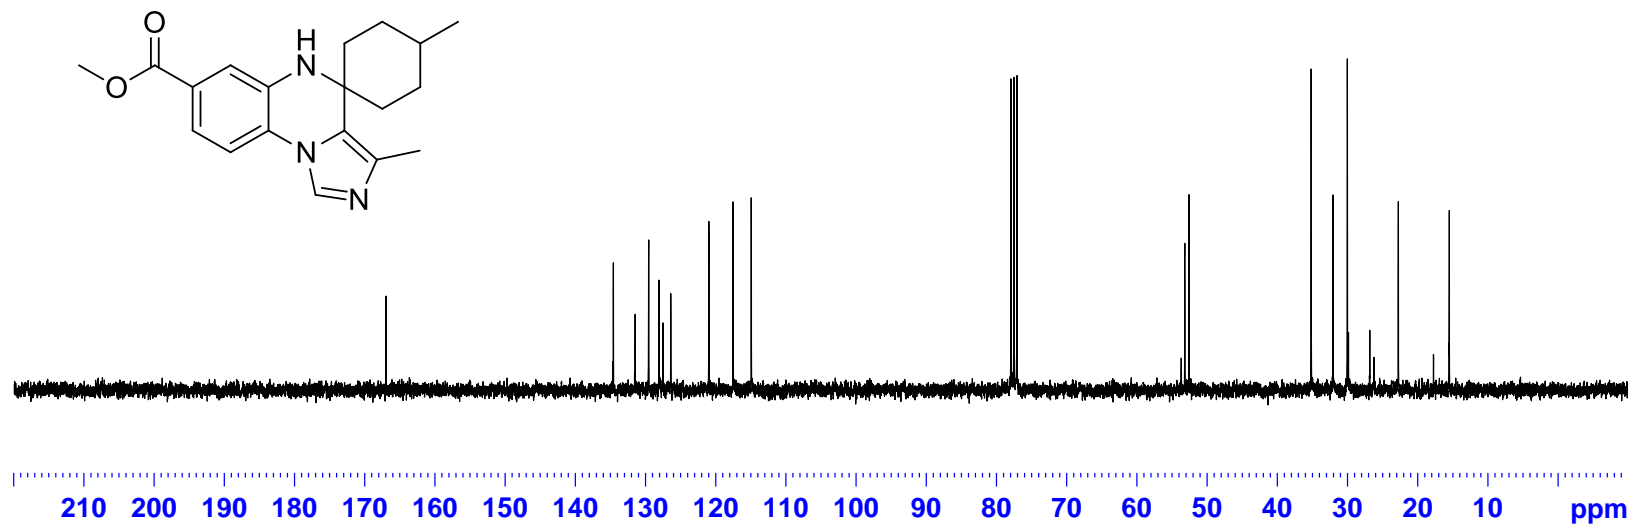

$^{13}\text{C}$  NMR spectrum (75 MHz) of compound **12i** in  $\text{CDCl}_3$

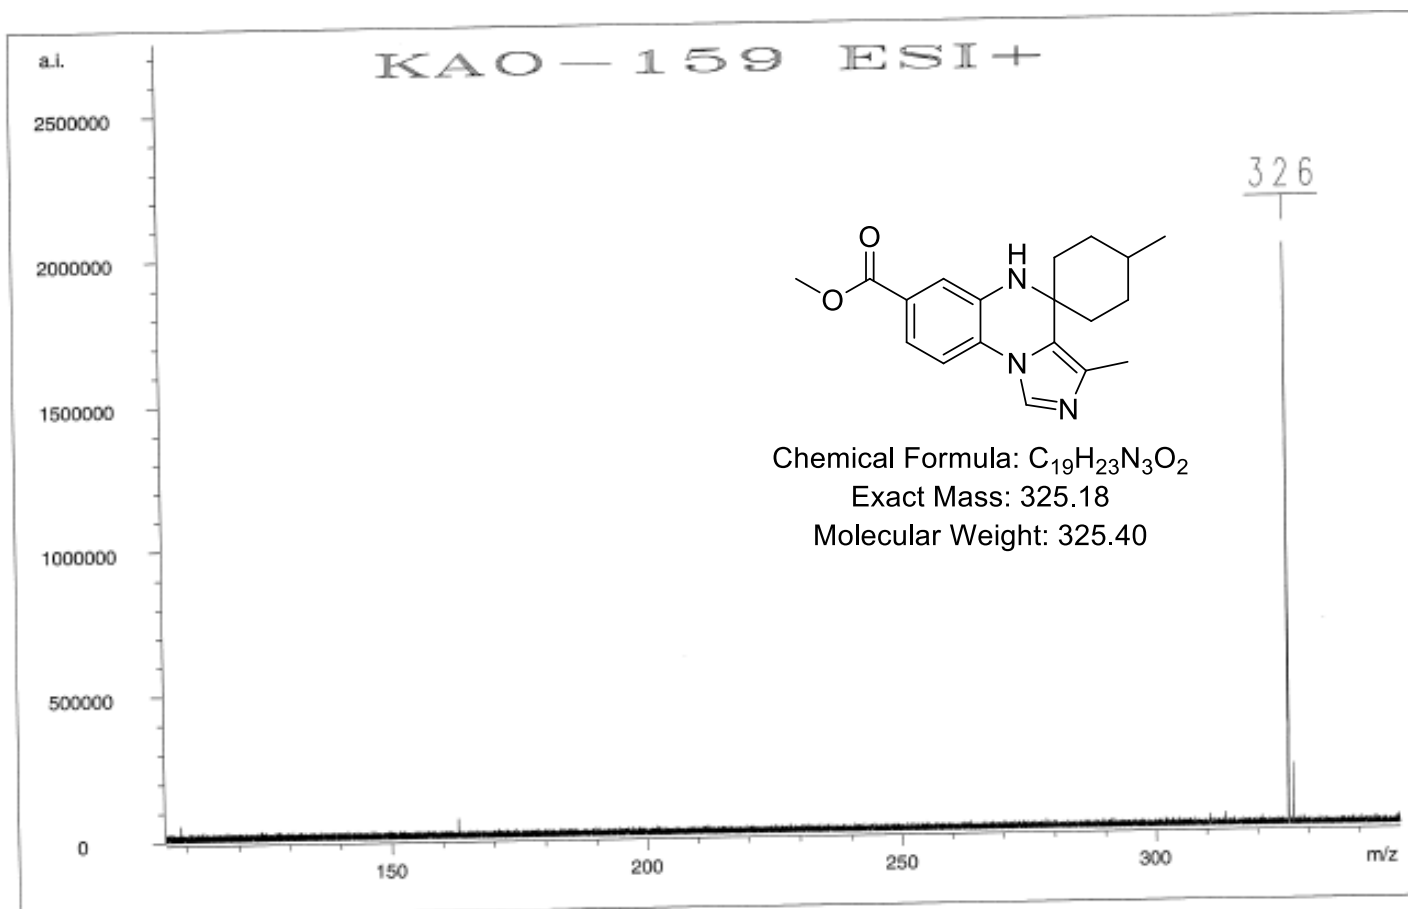

ESI-LRMS of compound **12**

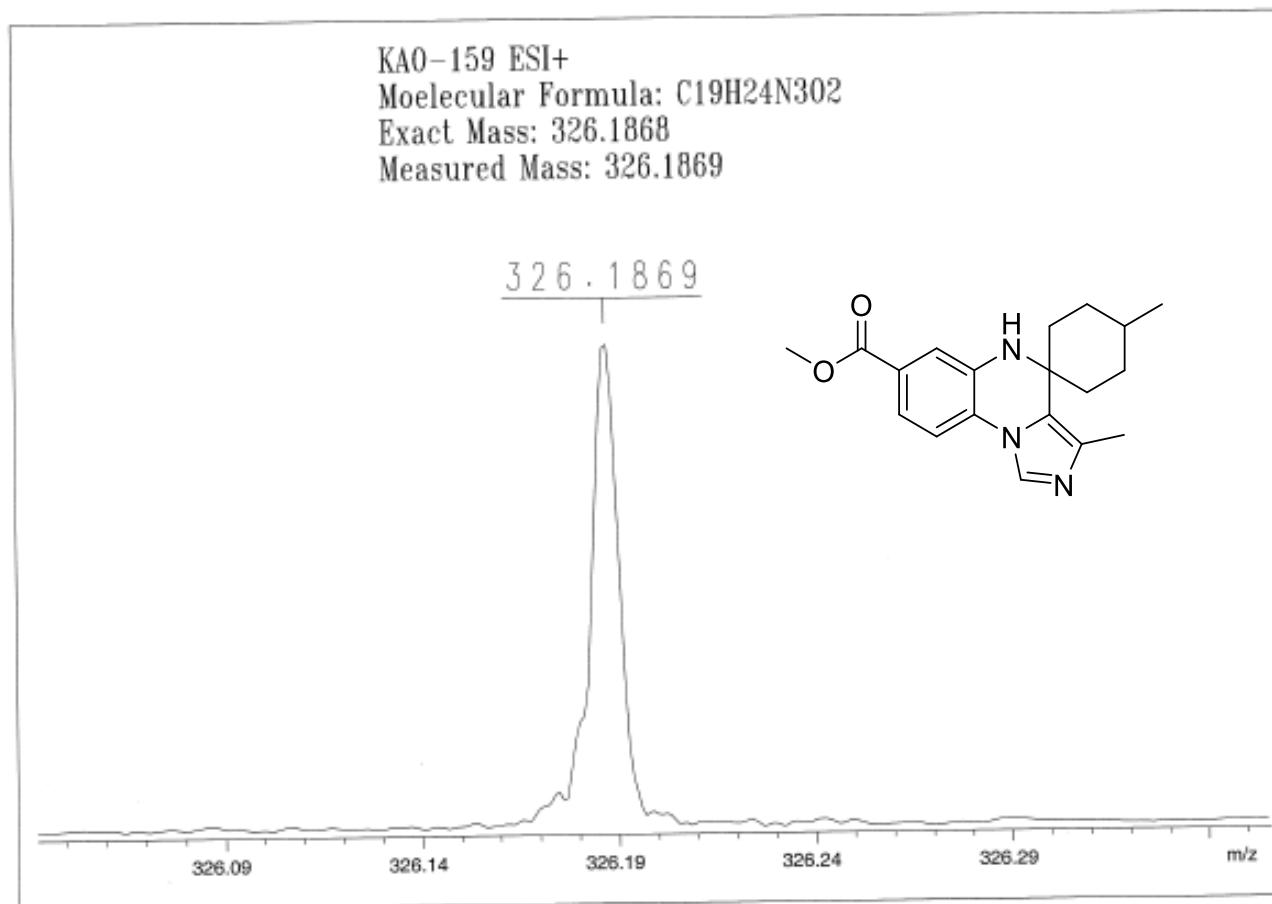

ESI-HRMS of compound **12I**

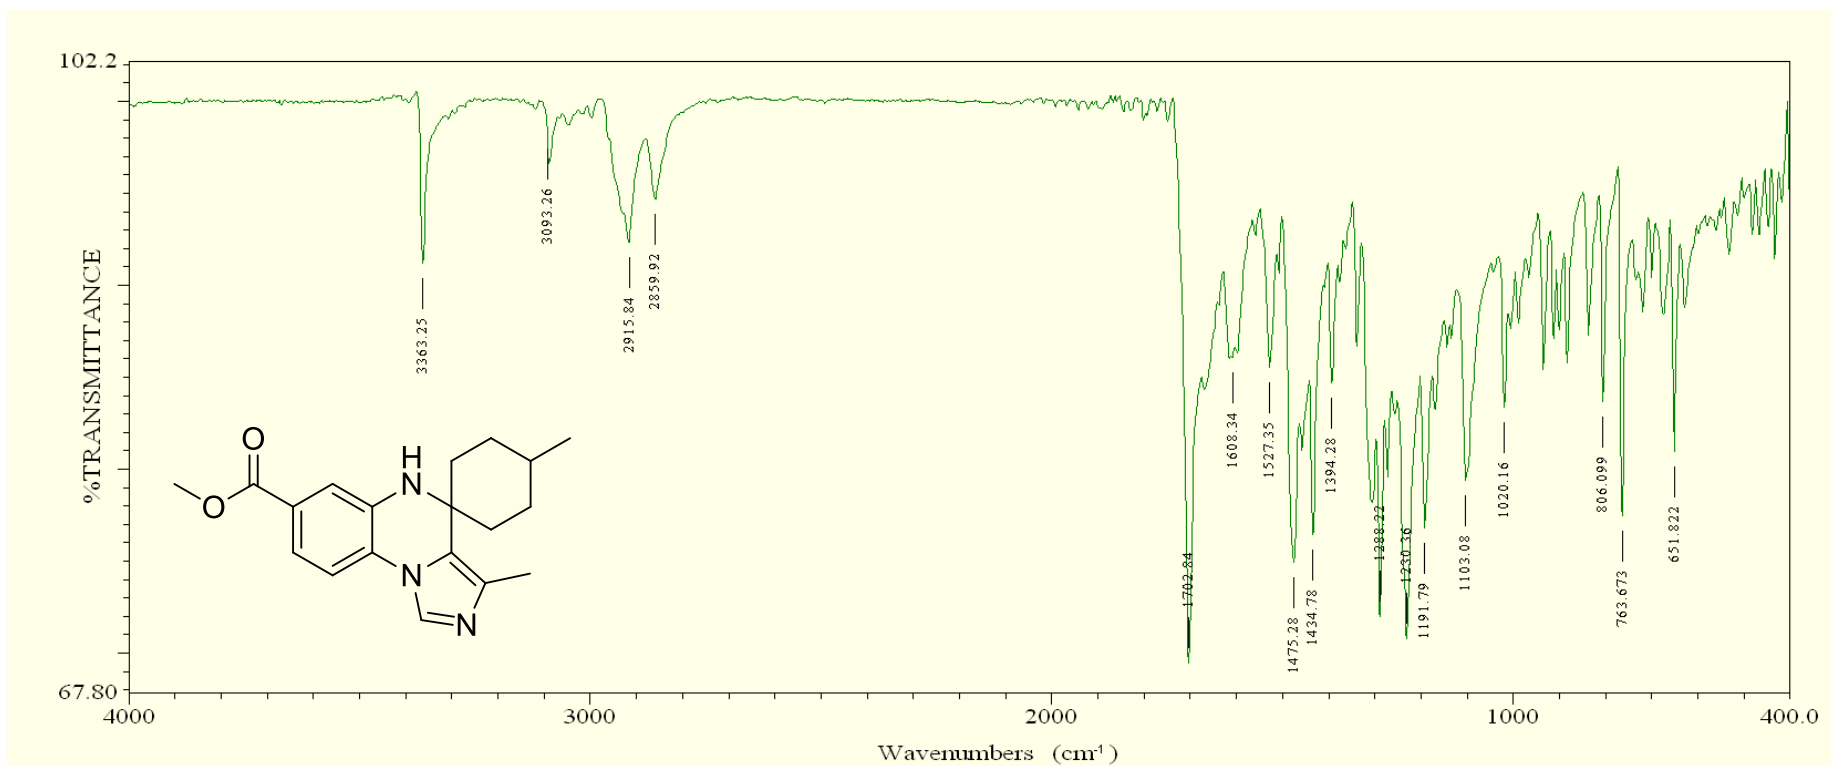

IR spectrum of compound 12I

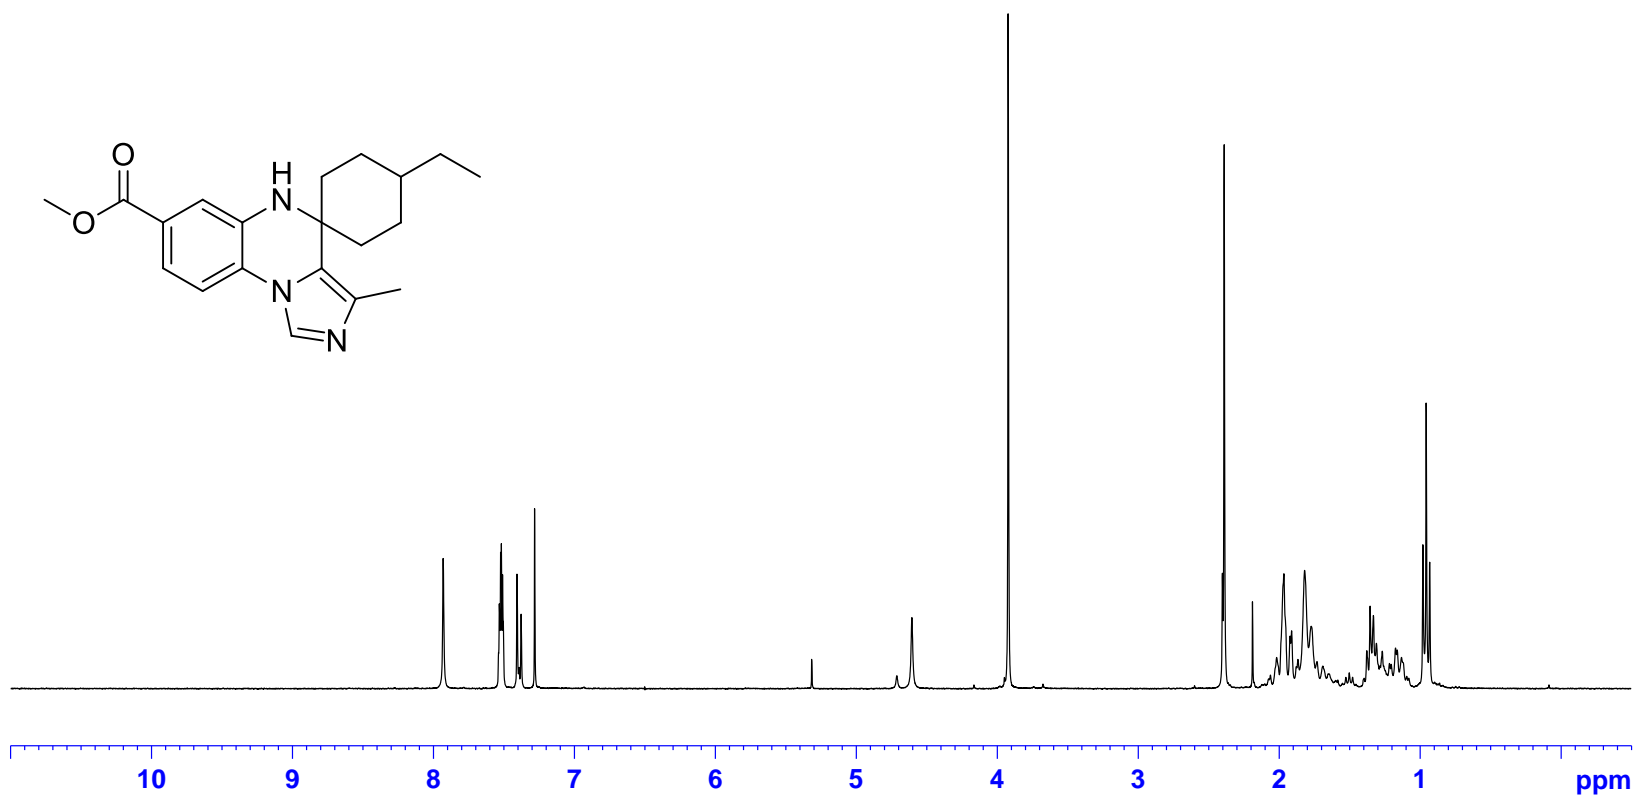

<sup>1</sup>H NMR spectrum (300 MHz) of compound **12m** in CDCl<sub>3</sub>

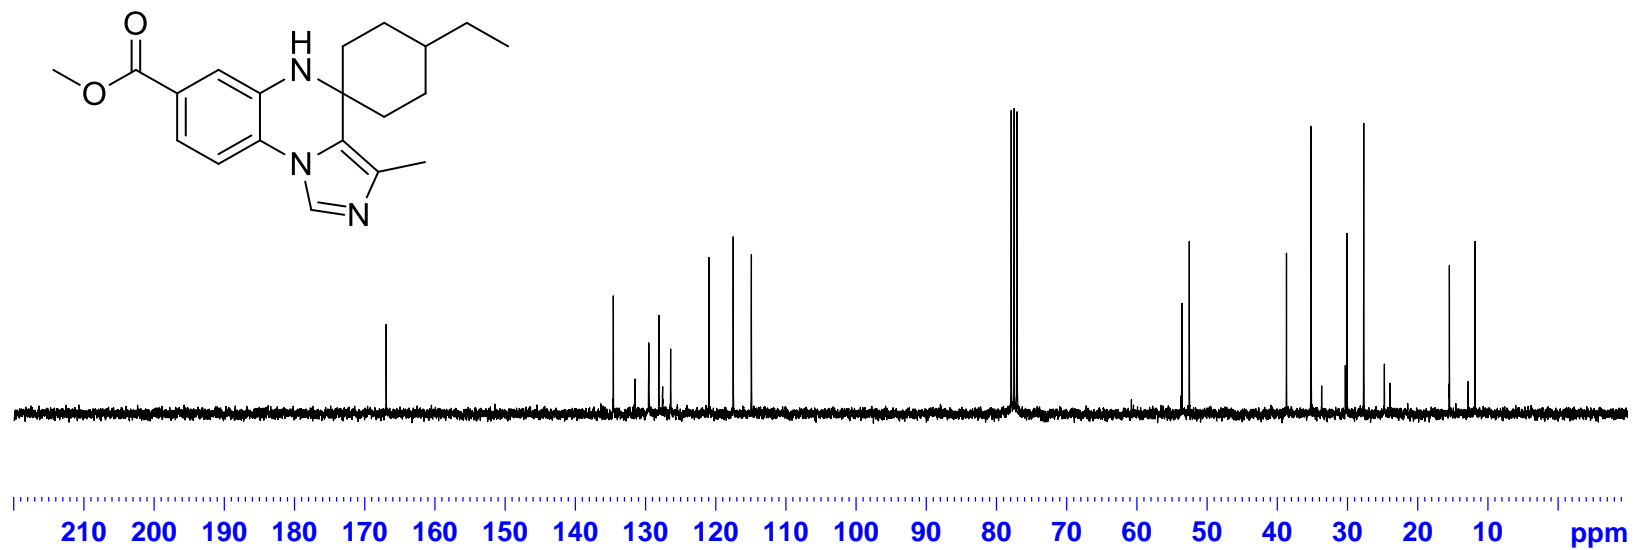

$^{13}\text{C}$  NMR spectrum (75 MHz) of compound **12m** in  $\text{CDCl}_3$

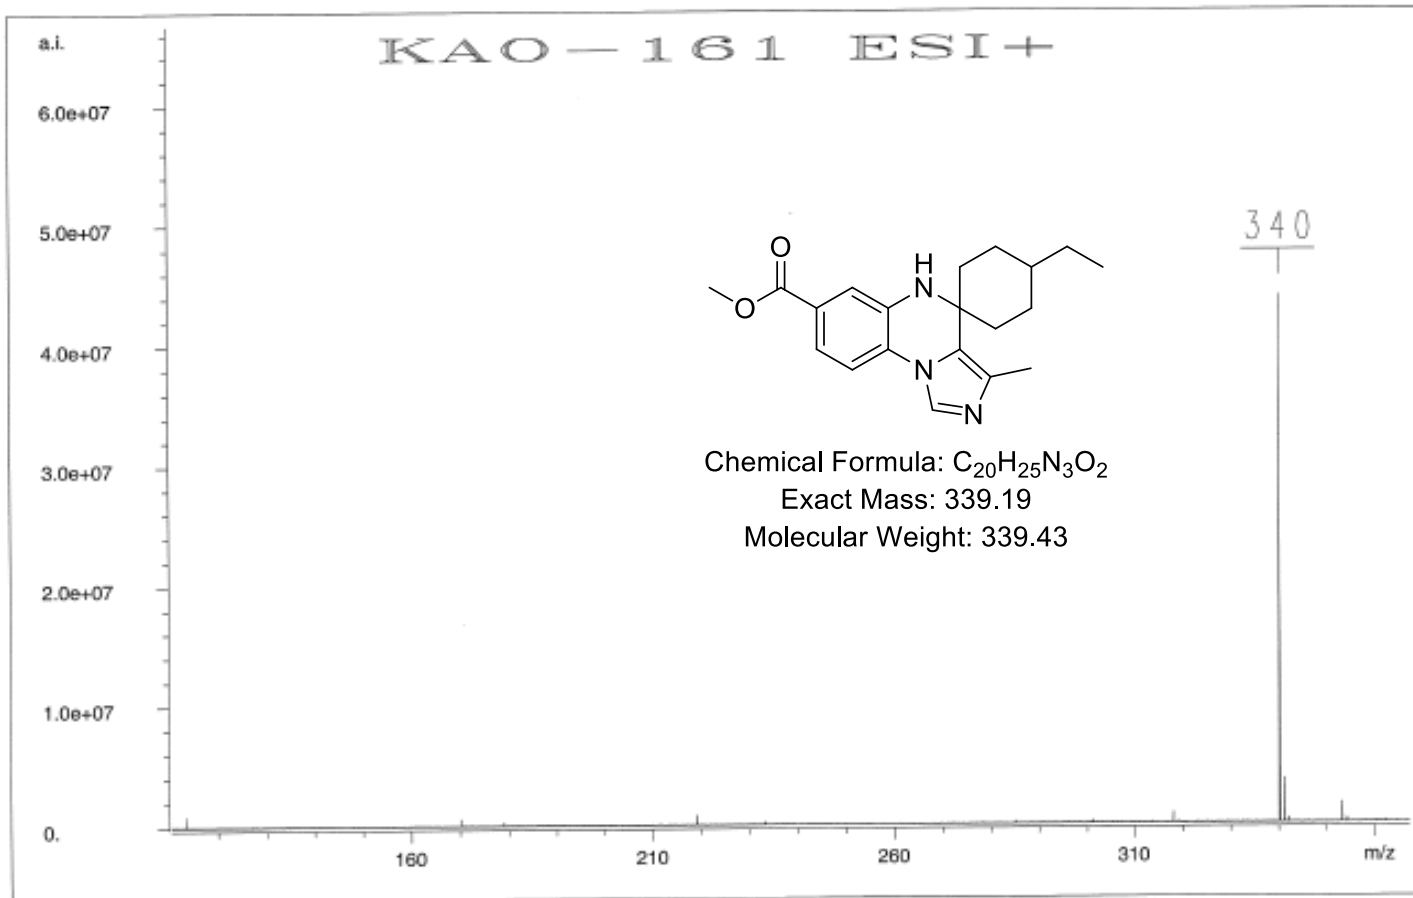

ESI-LRMS of compound **12m**



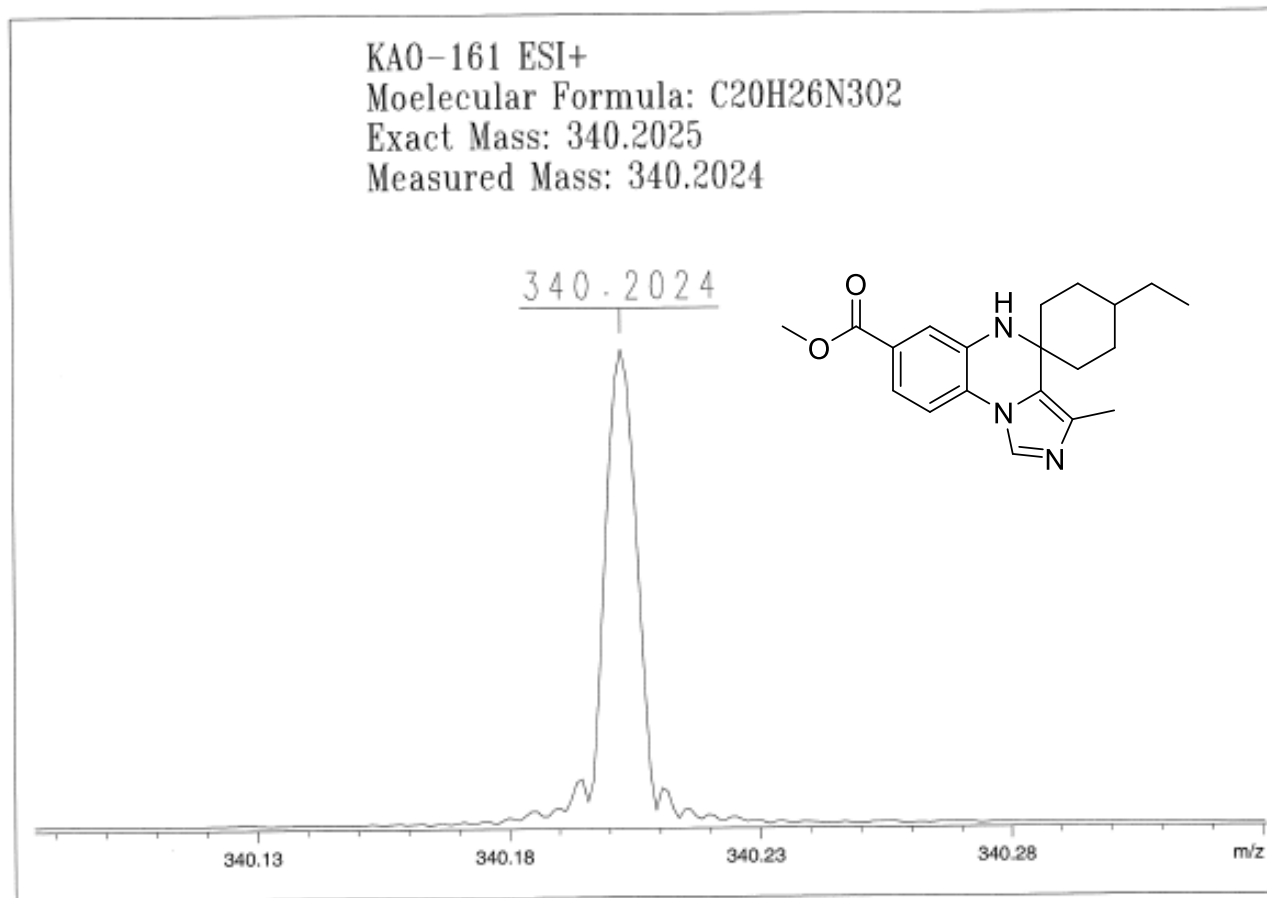

ESI-HRMS of compound **12m**

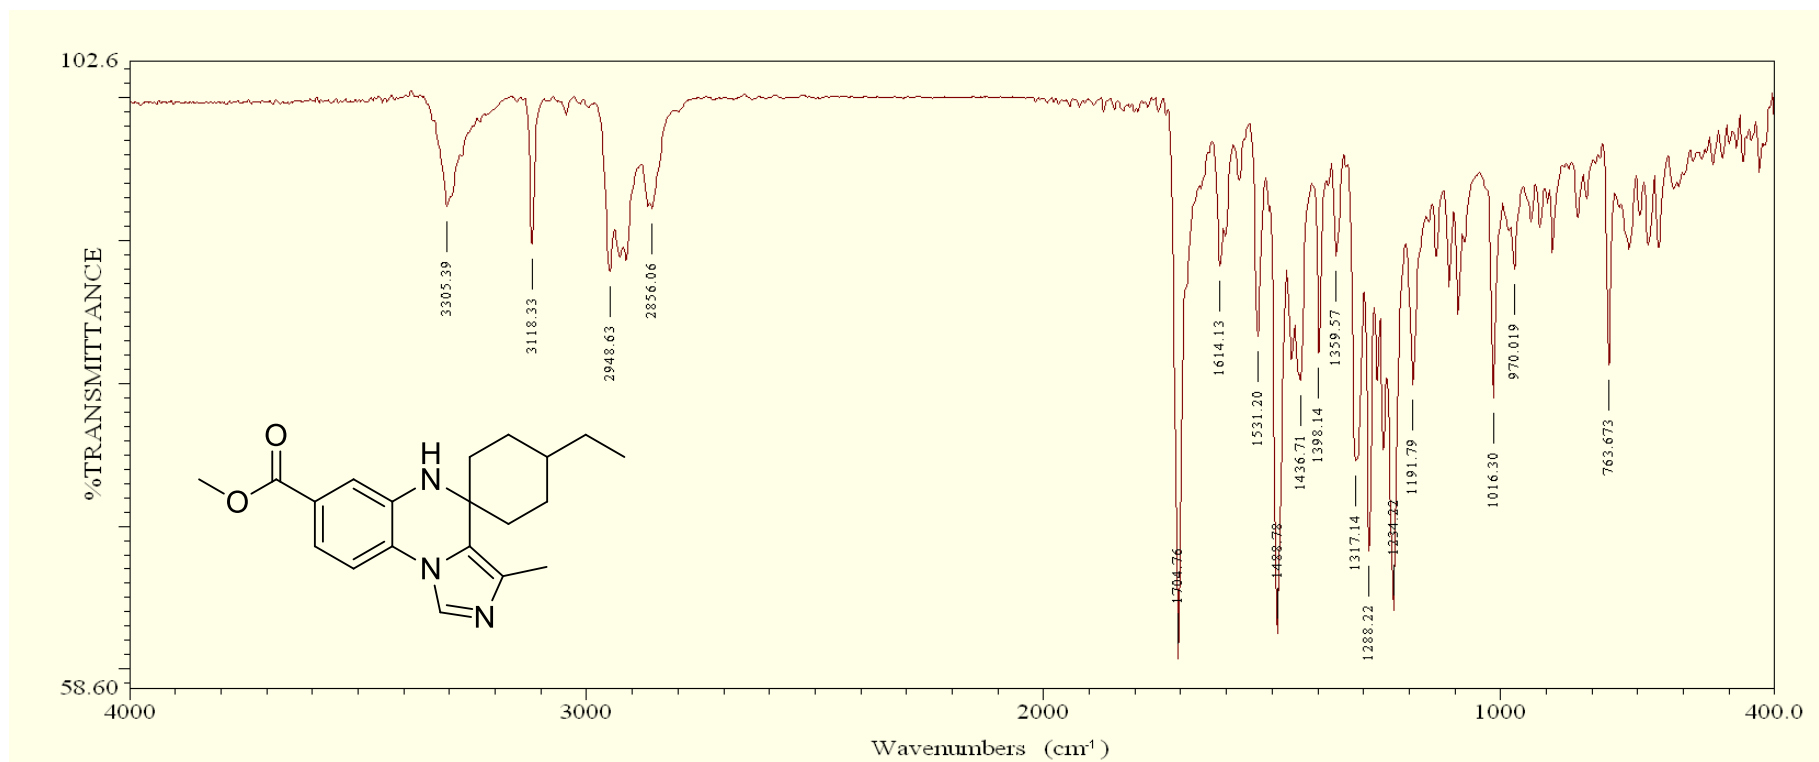

IR spectrum of compound **12m**

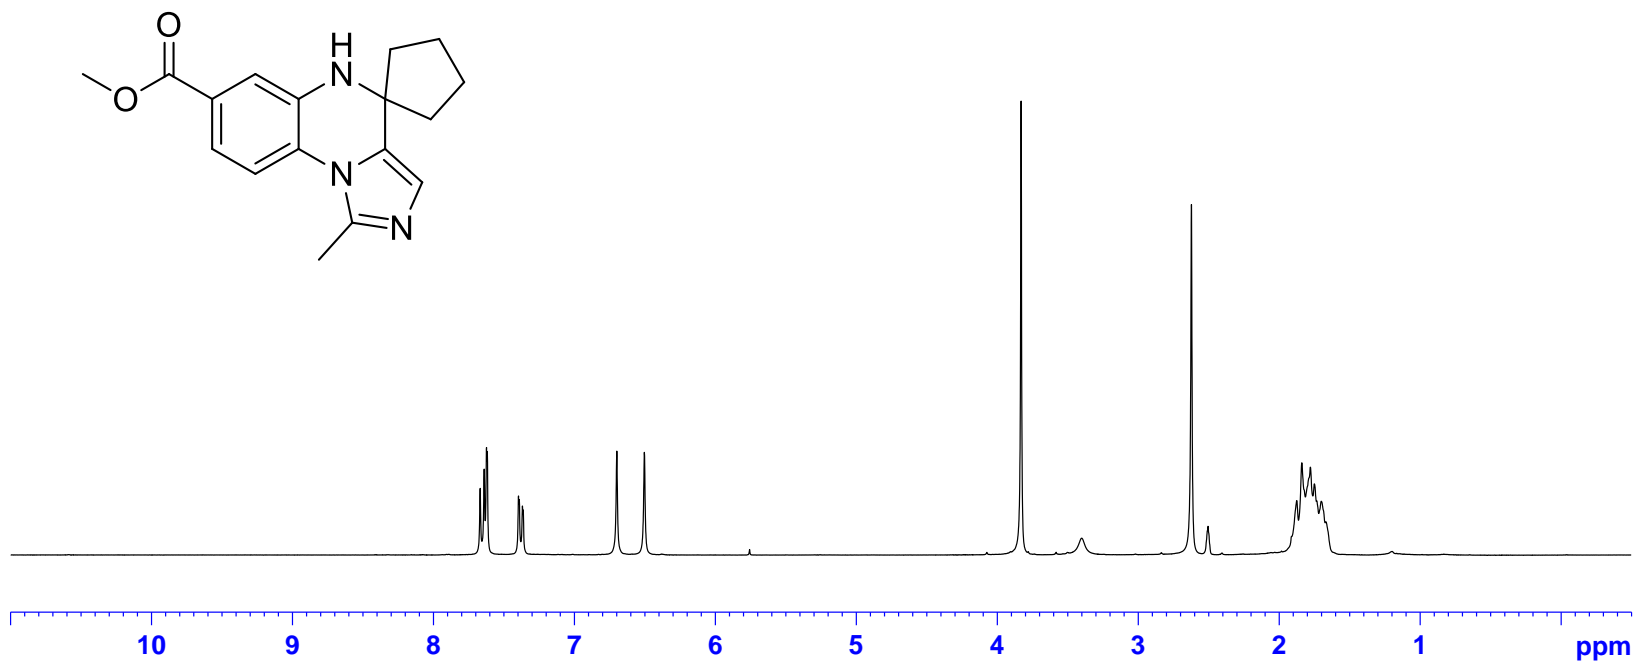

$^1\text{H}$  NMR spectrum (300 MHz) of compound **12n** in  $\text{CDCl}_3$

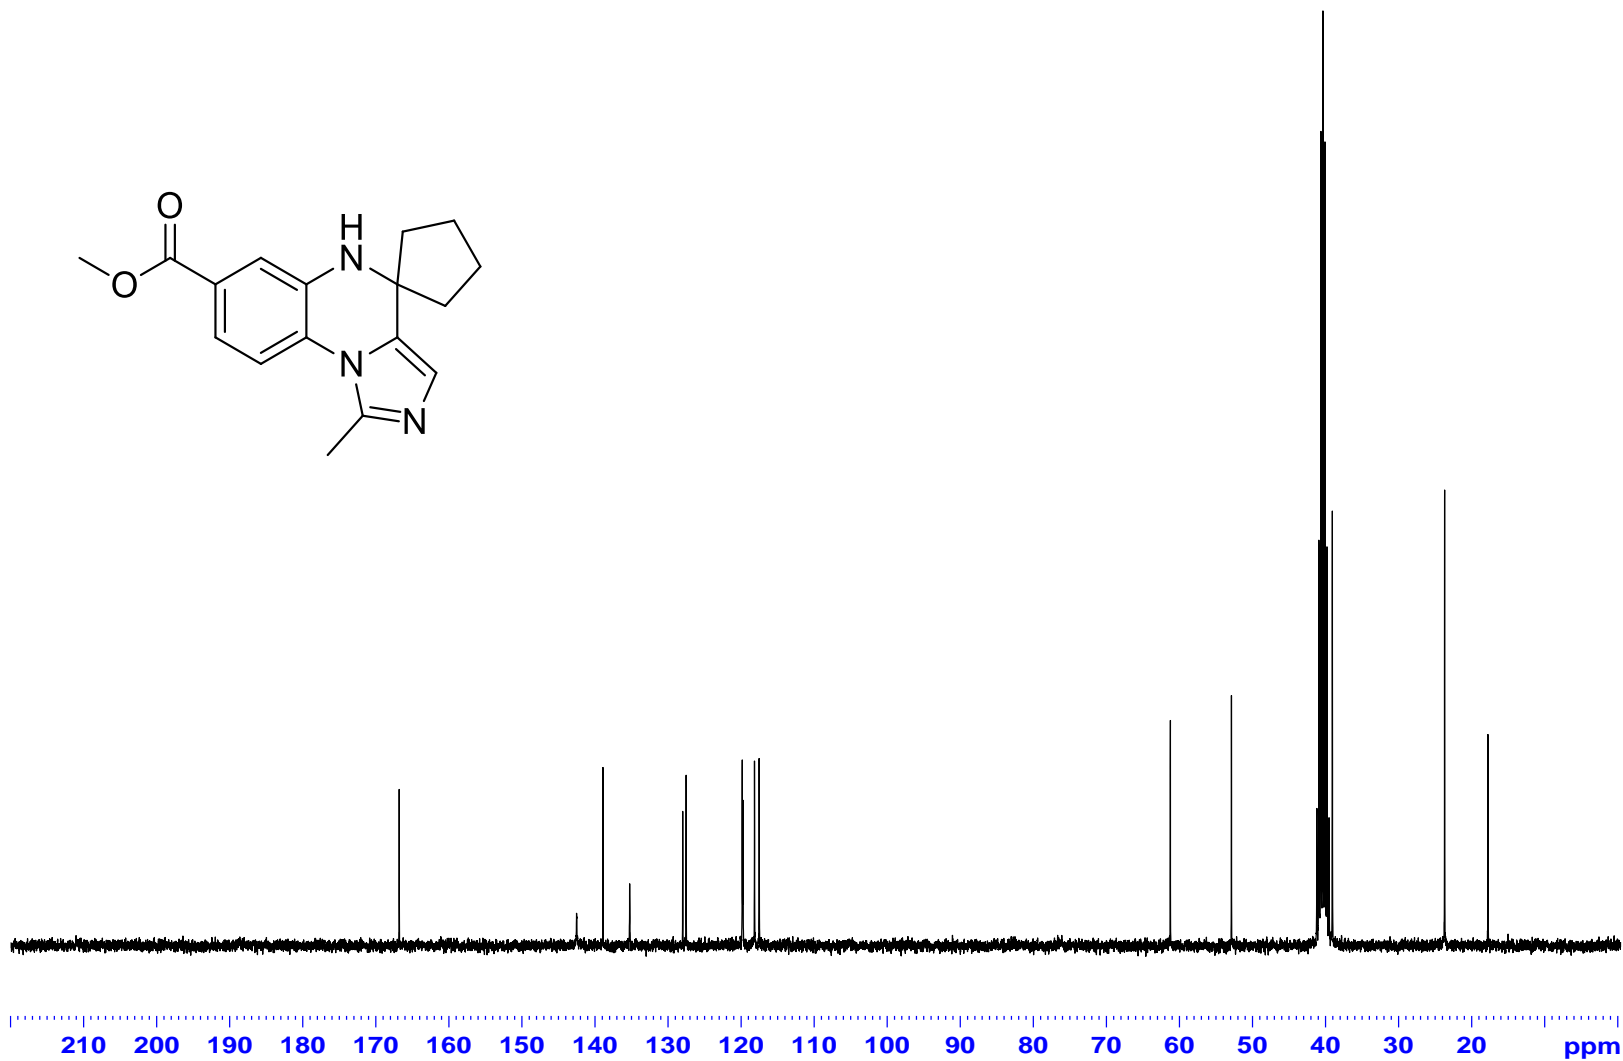

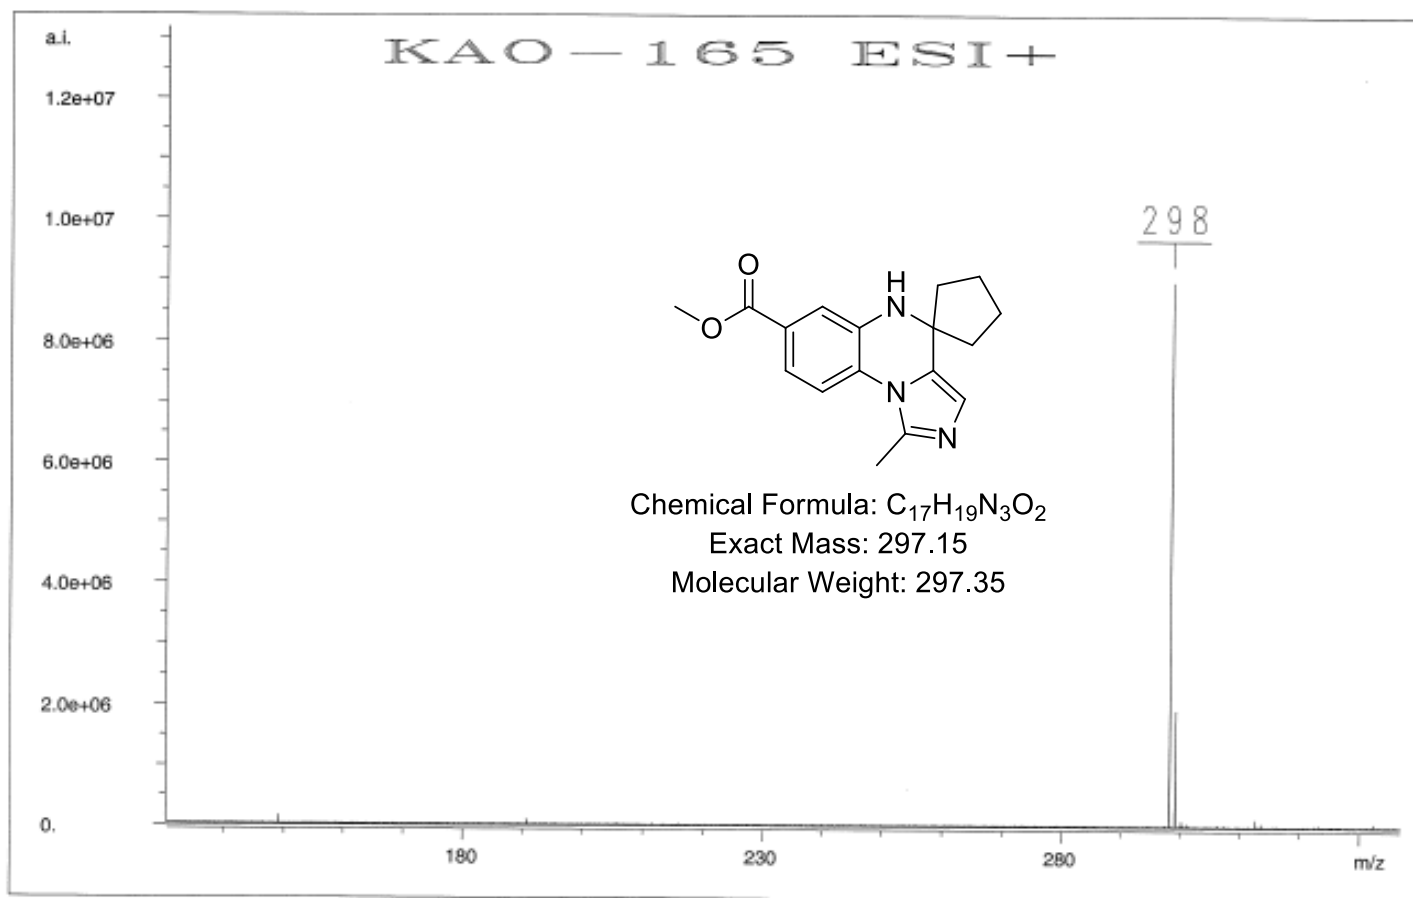

ESI-LRMS of compound **12n**

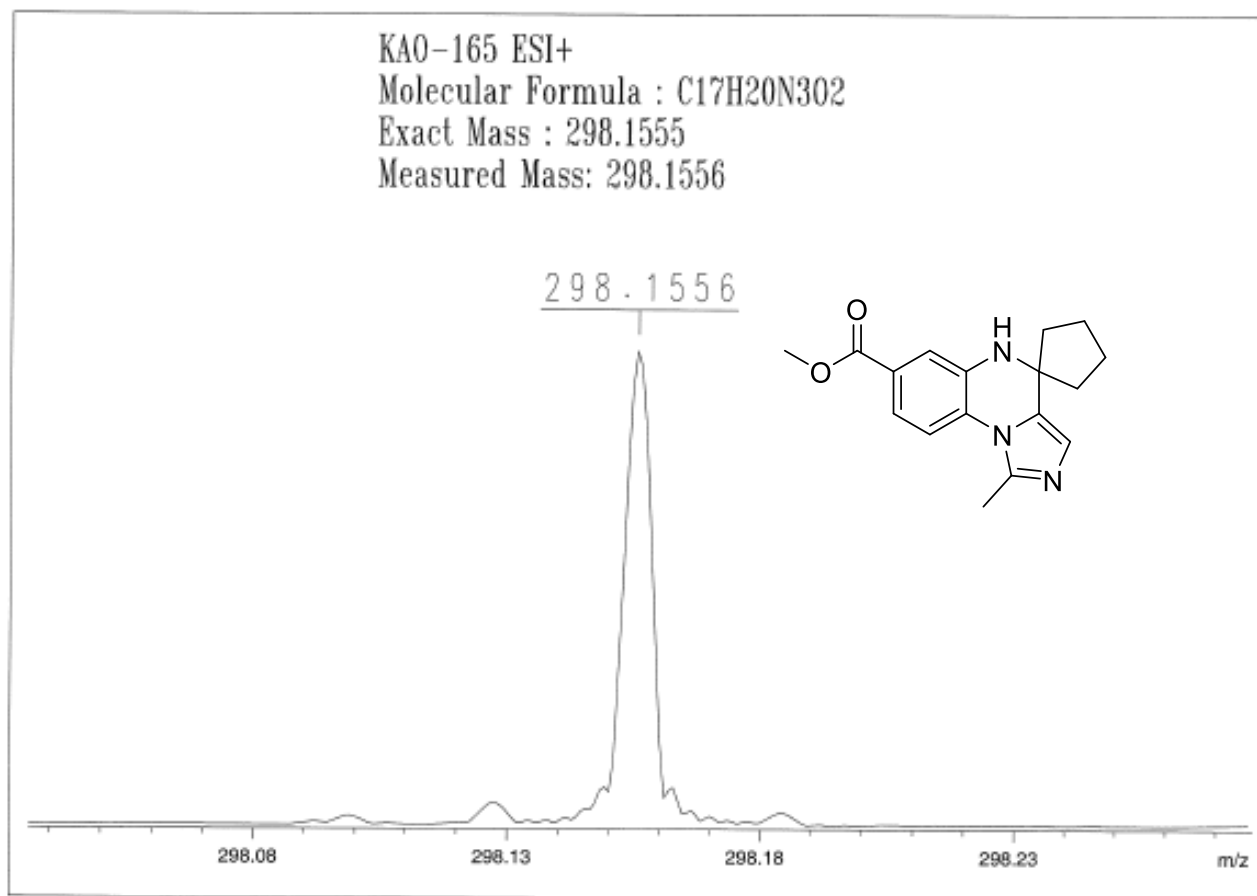

ESI-HRMS of compound **12n**

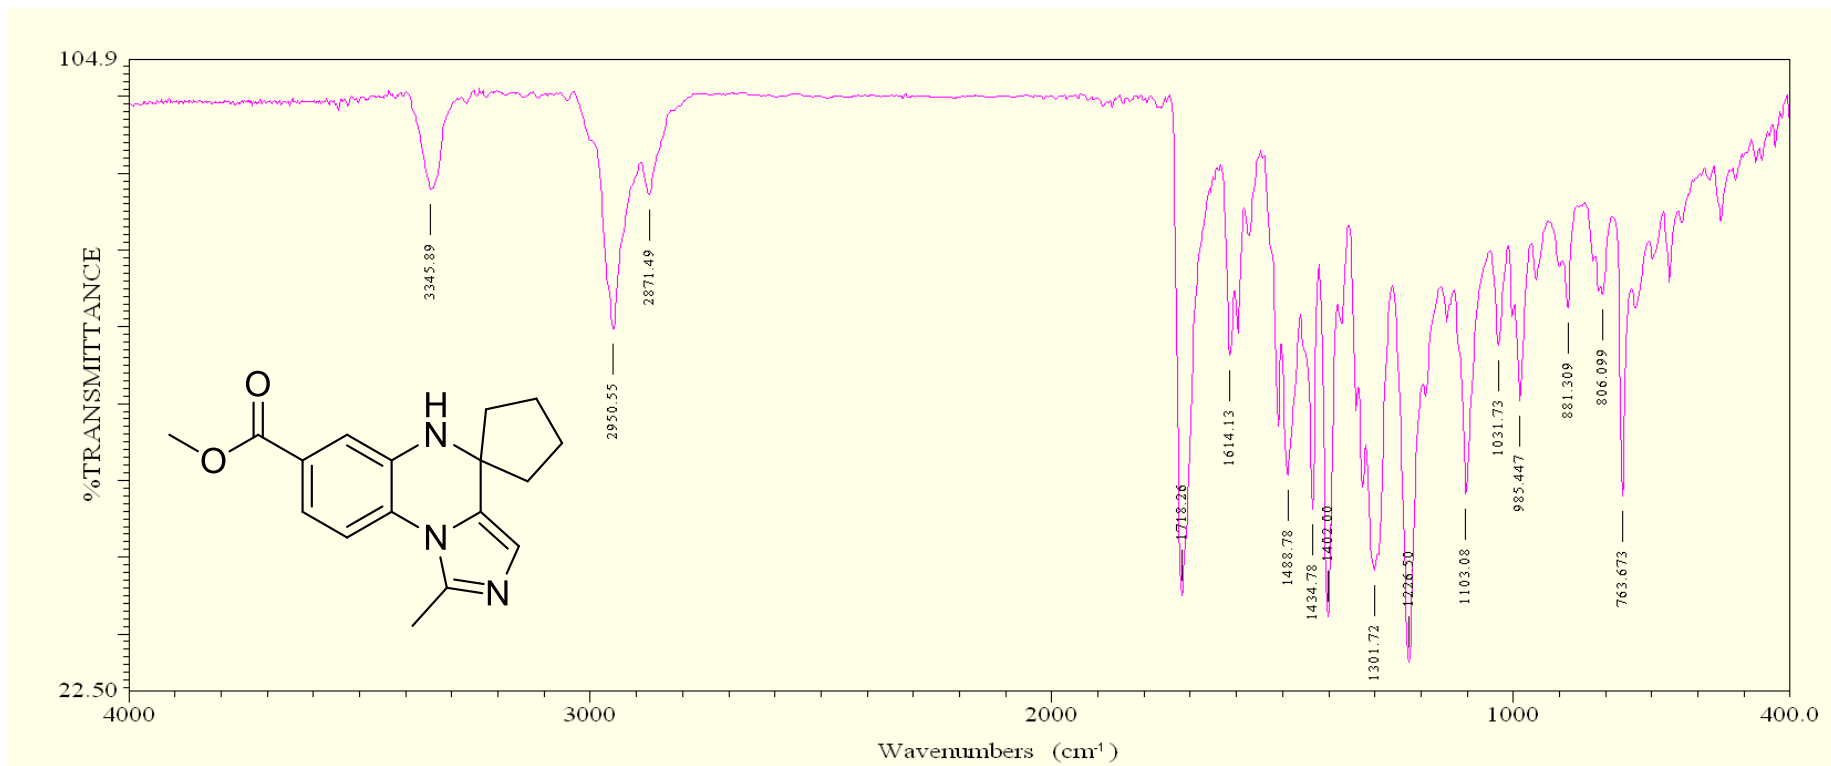

IR spectrum of compound **12n**

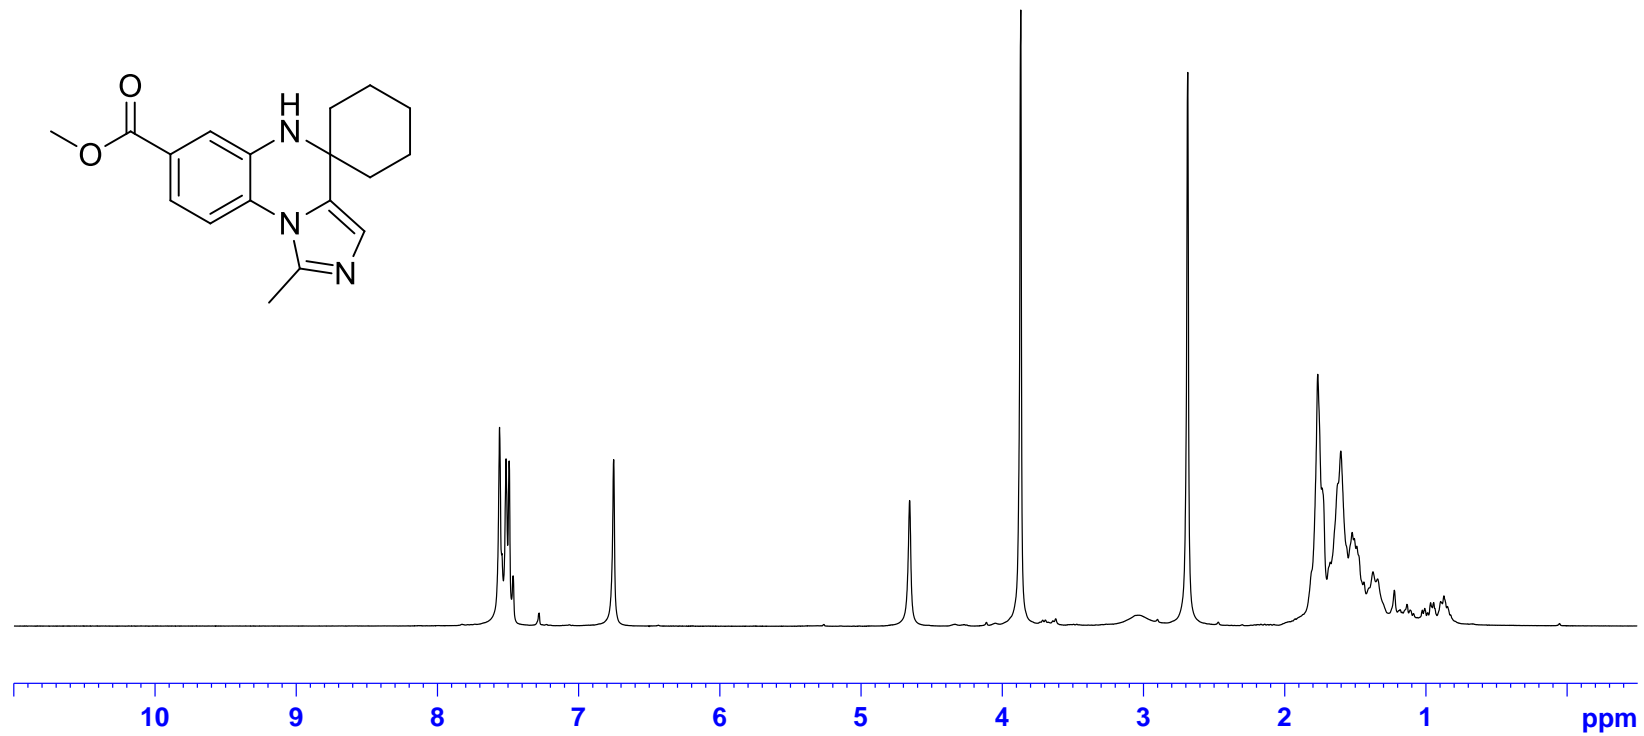

<sup>1</sup>H NMR spectrum (300 MHz) of compound **12o** in CDCl<sub>3</sub>



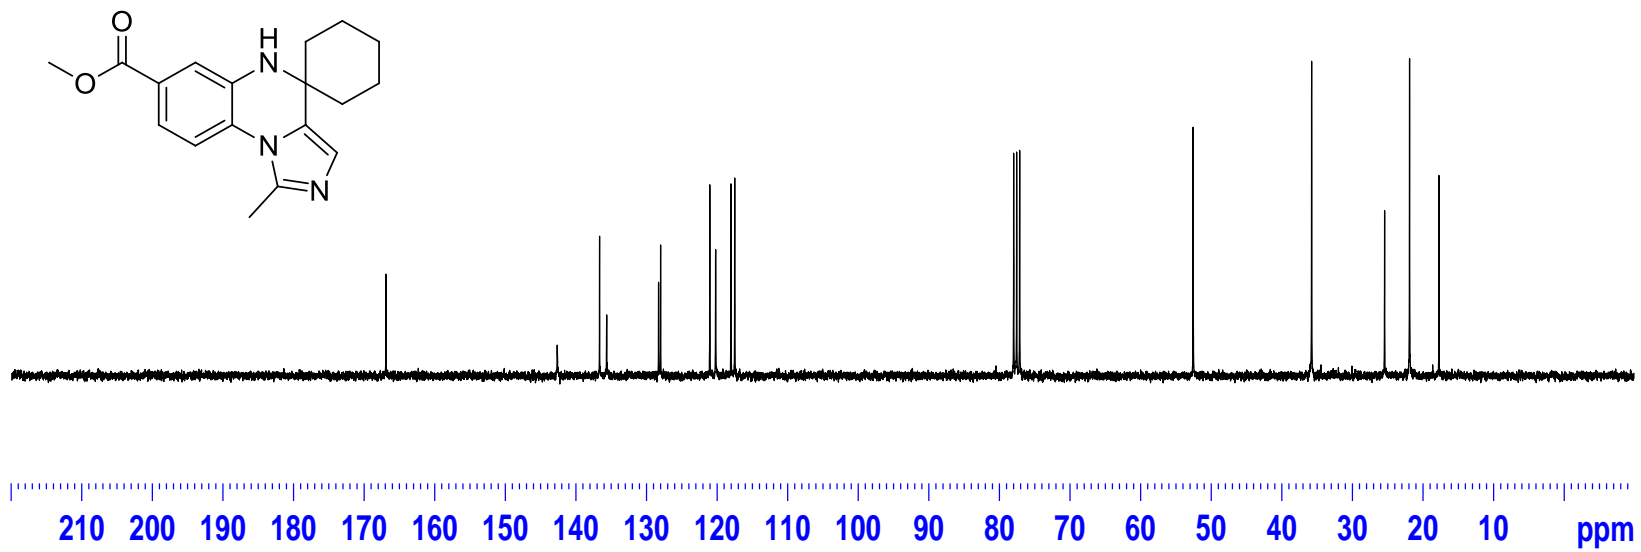

<sup>13</sup>C NMR spectrum (75 MHz) of compound **12o** in CDCl<sub>3</sub>

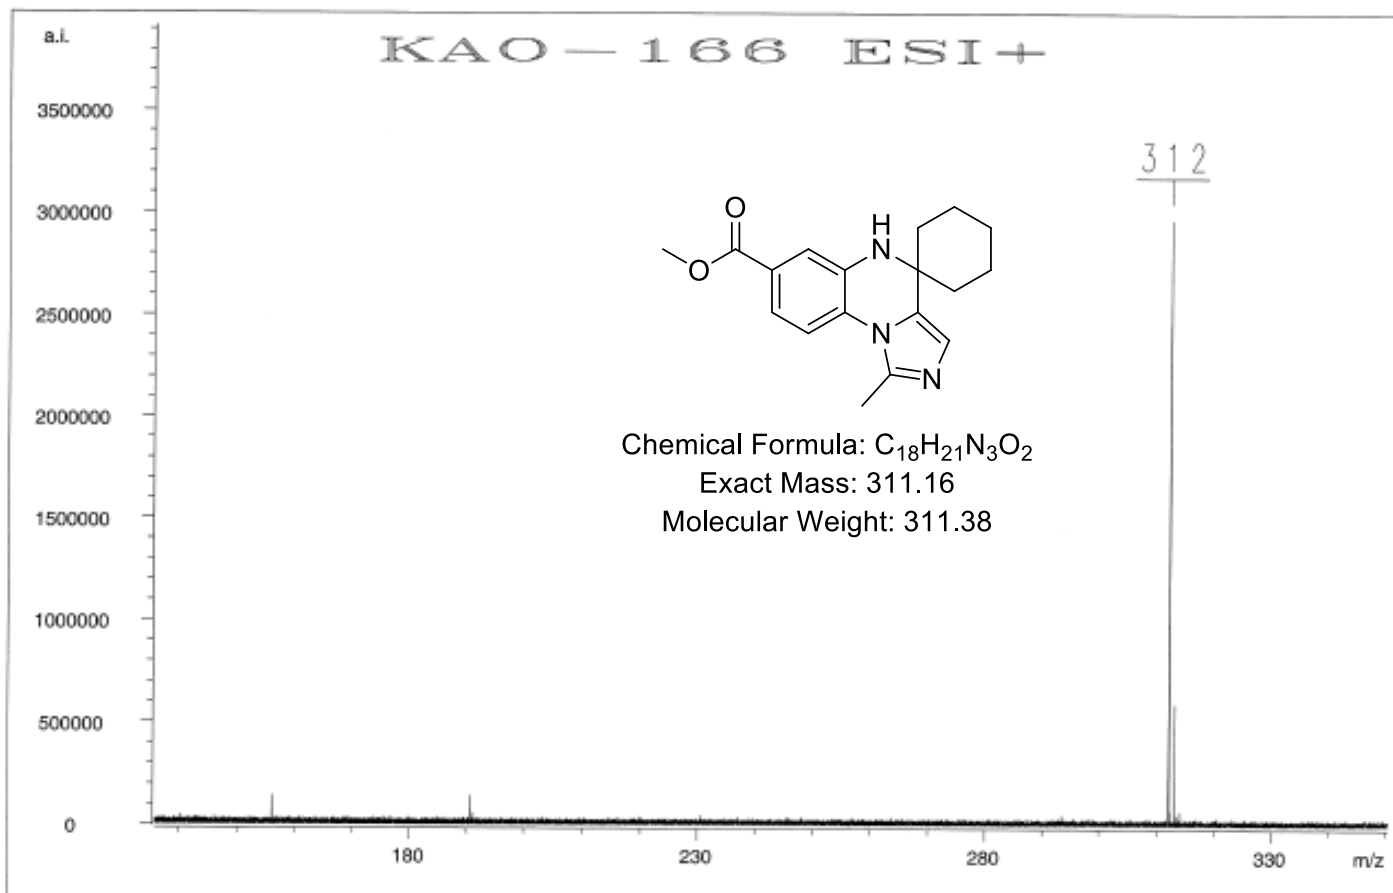

ESI-LRMS of compound **12o**

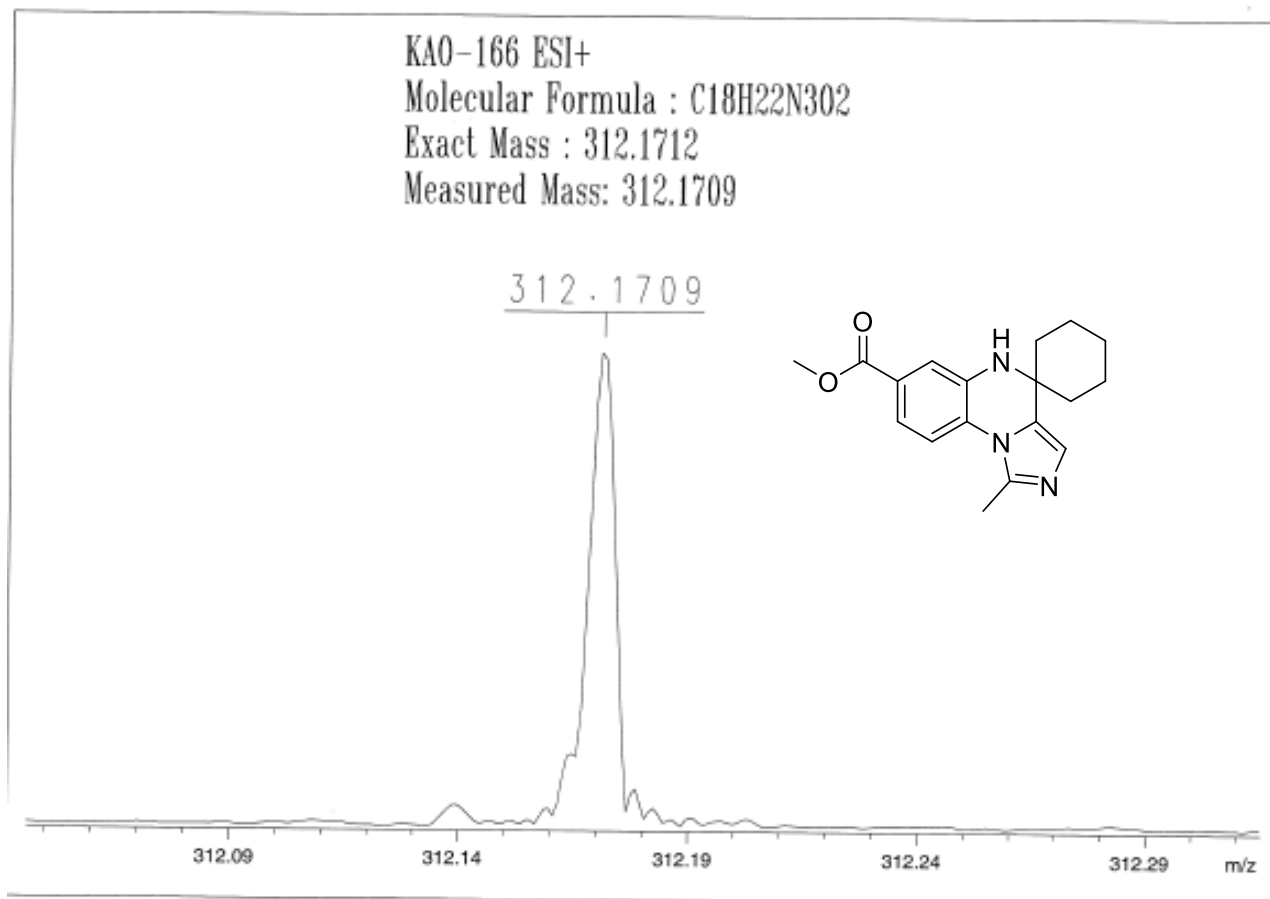

ESI-HRMS of compound **12o**

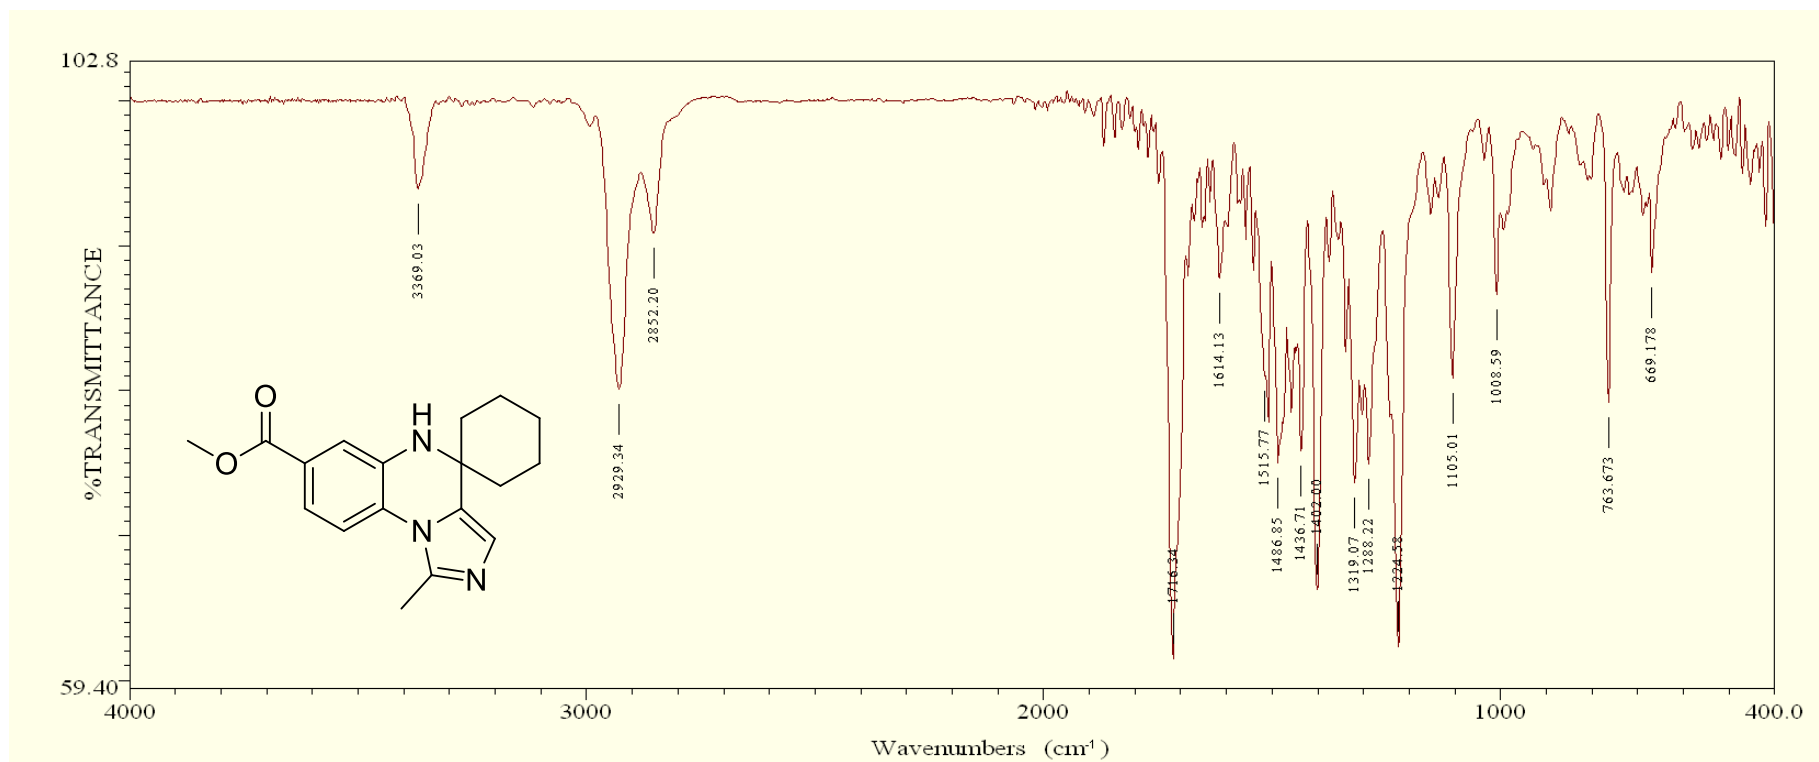

IR spectrum of compound **12o**

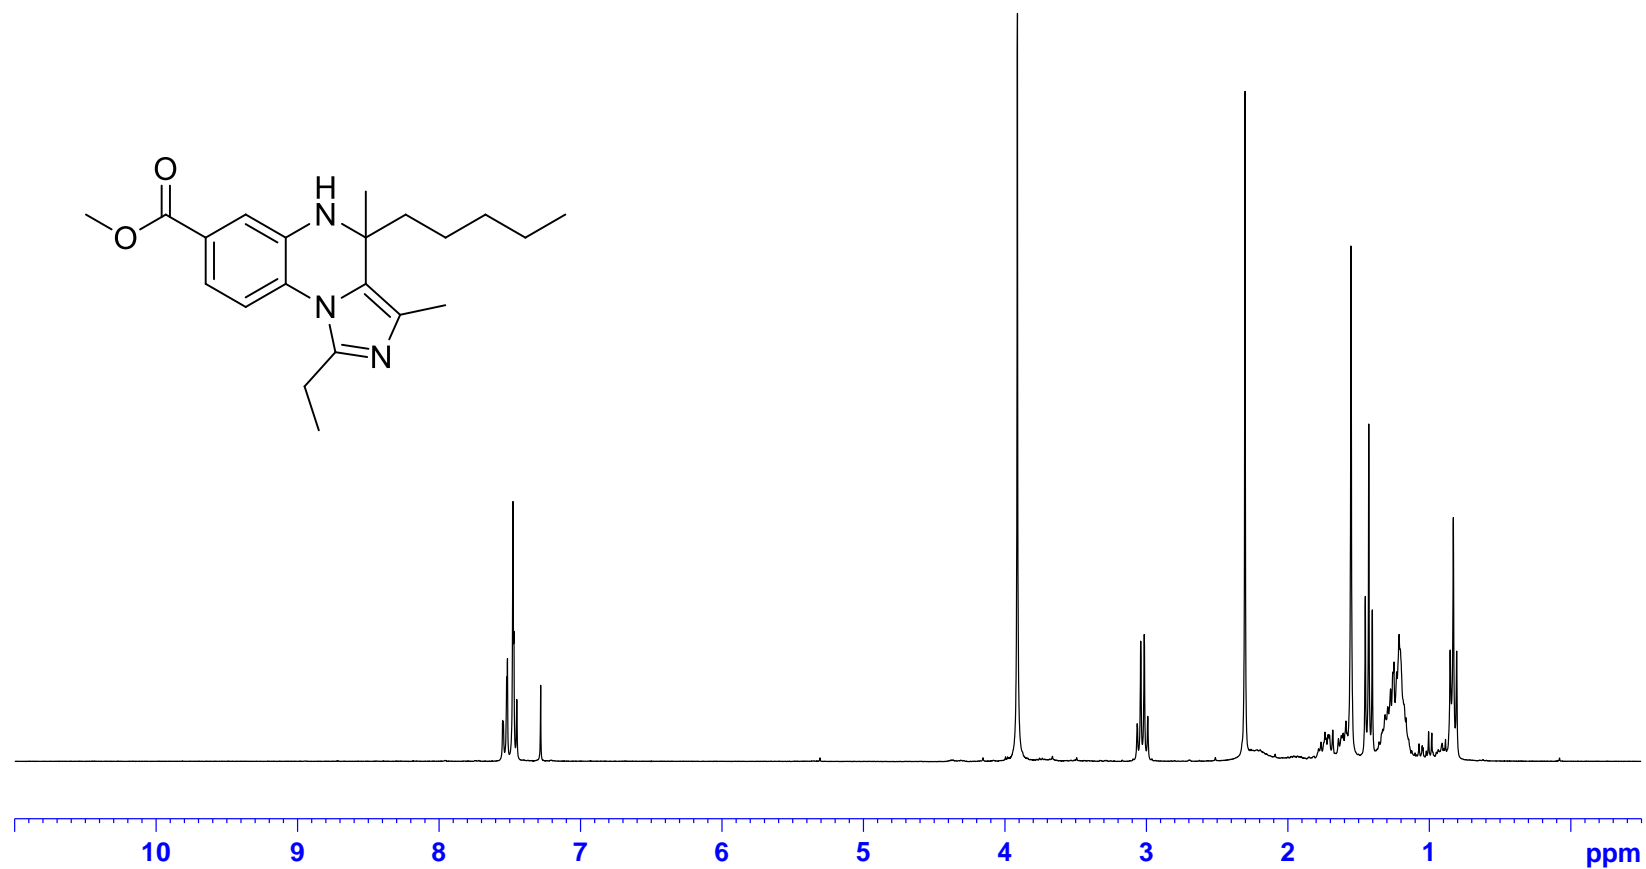

$^1\text{H}$  NMR spectrum (300 MHz) of compound **12p** in  $\text{CDCl}_3$

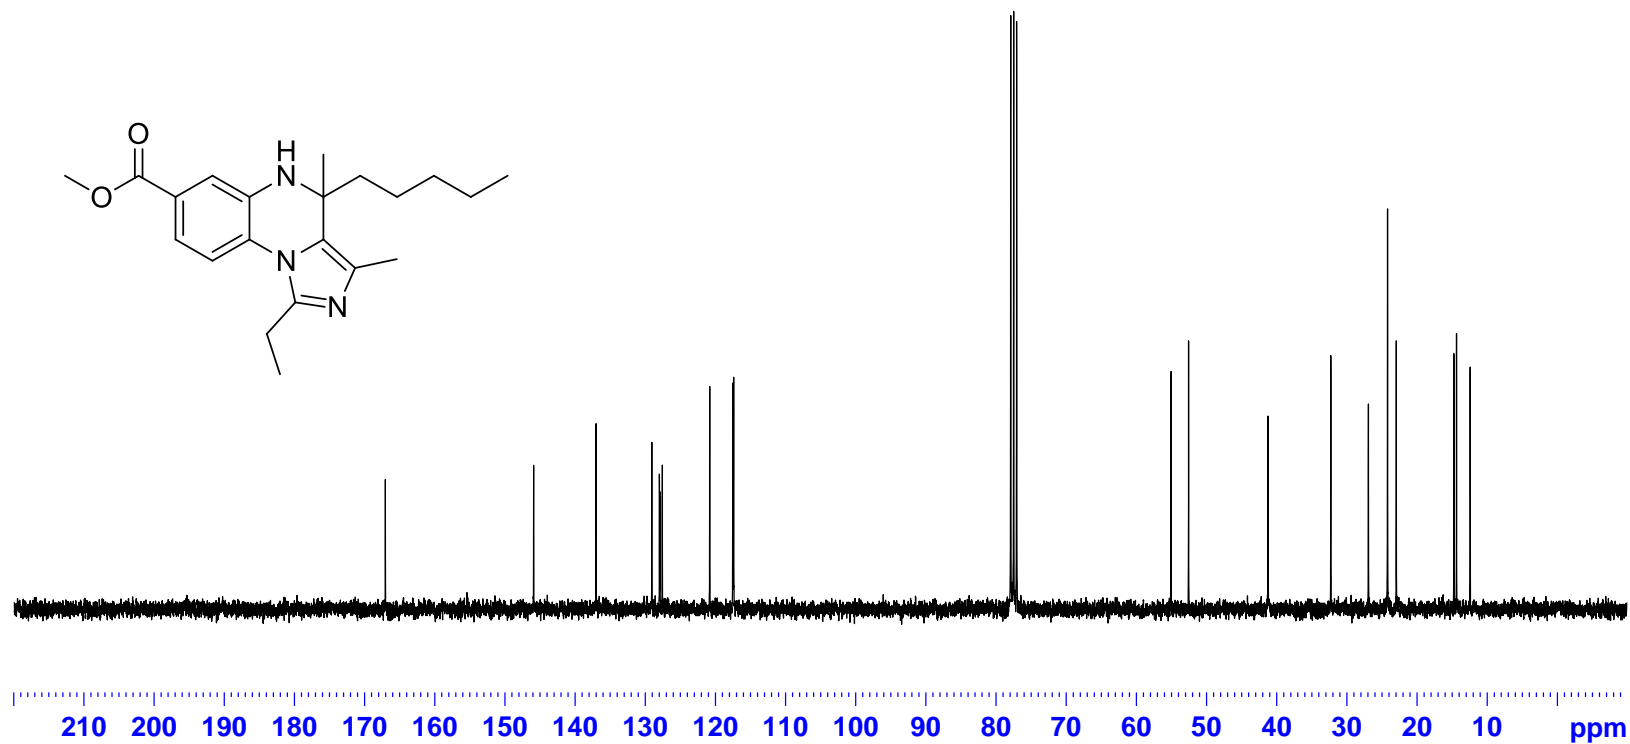

$^{13}\text{C}$  NMR spectrum (75 MHz) of compound **12p** in  $\text{CDCl}_3$

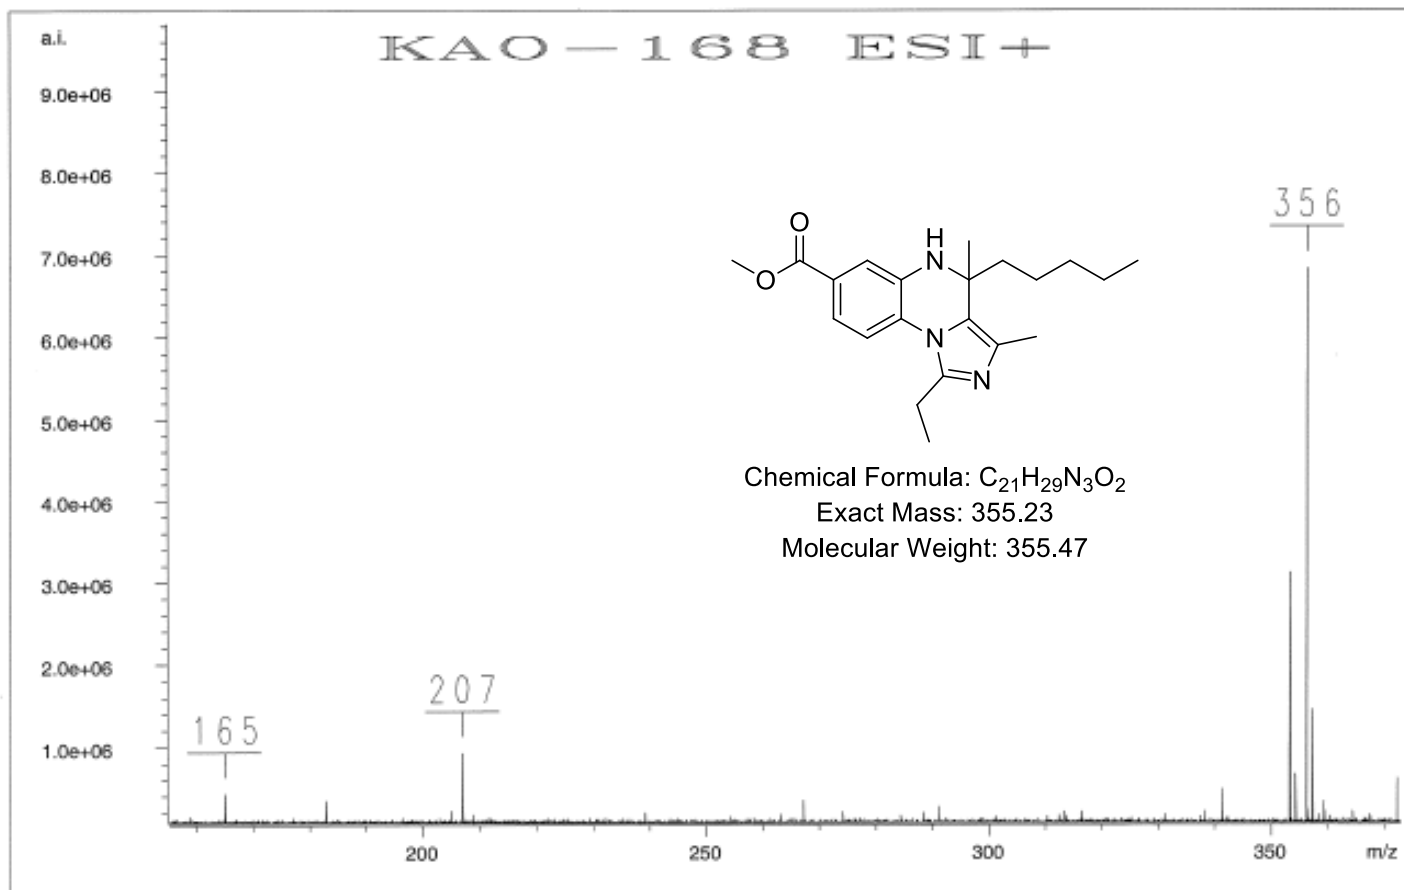

ESI-LRMS of compound **12p**

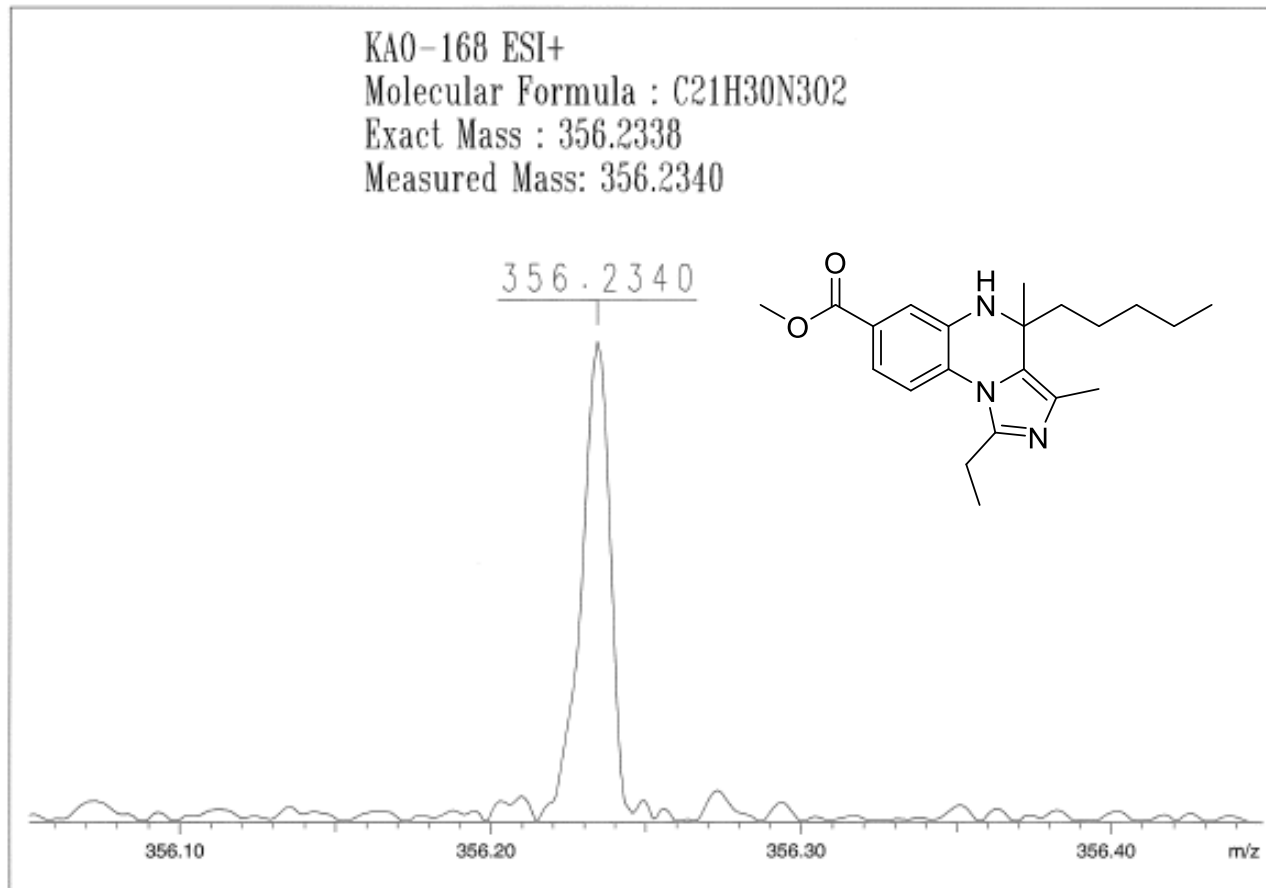

ESI-HRMS of compound **12p**



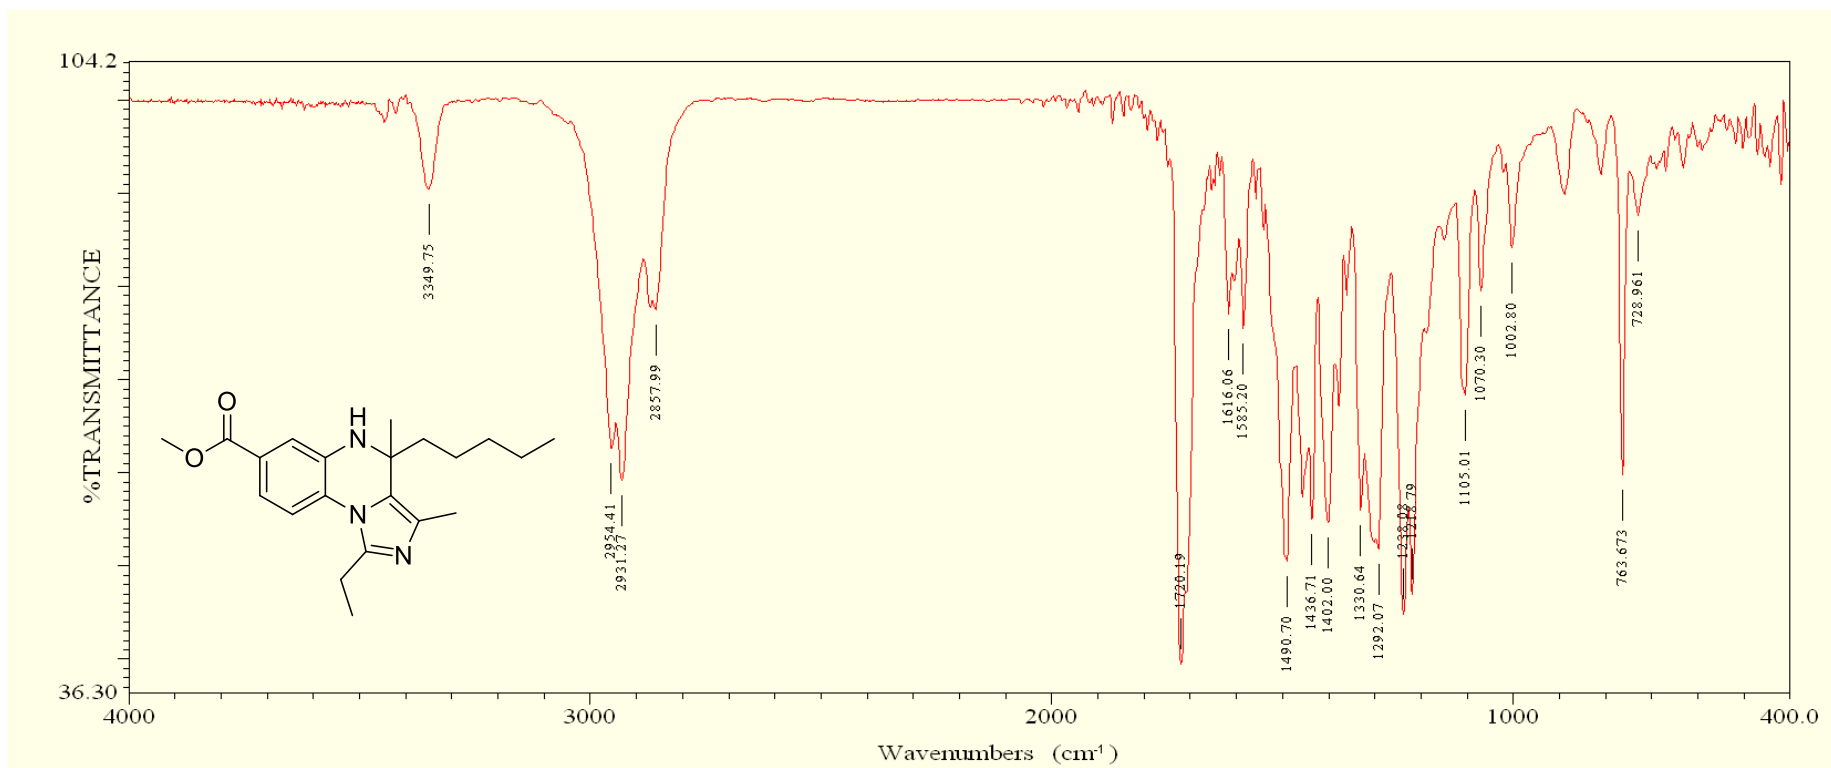

IR spectrum of compound 12p

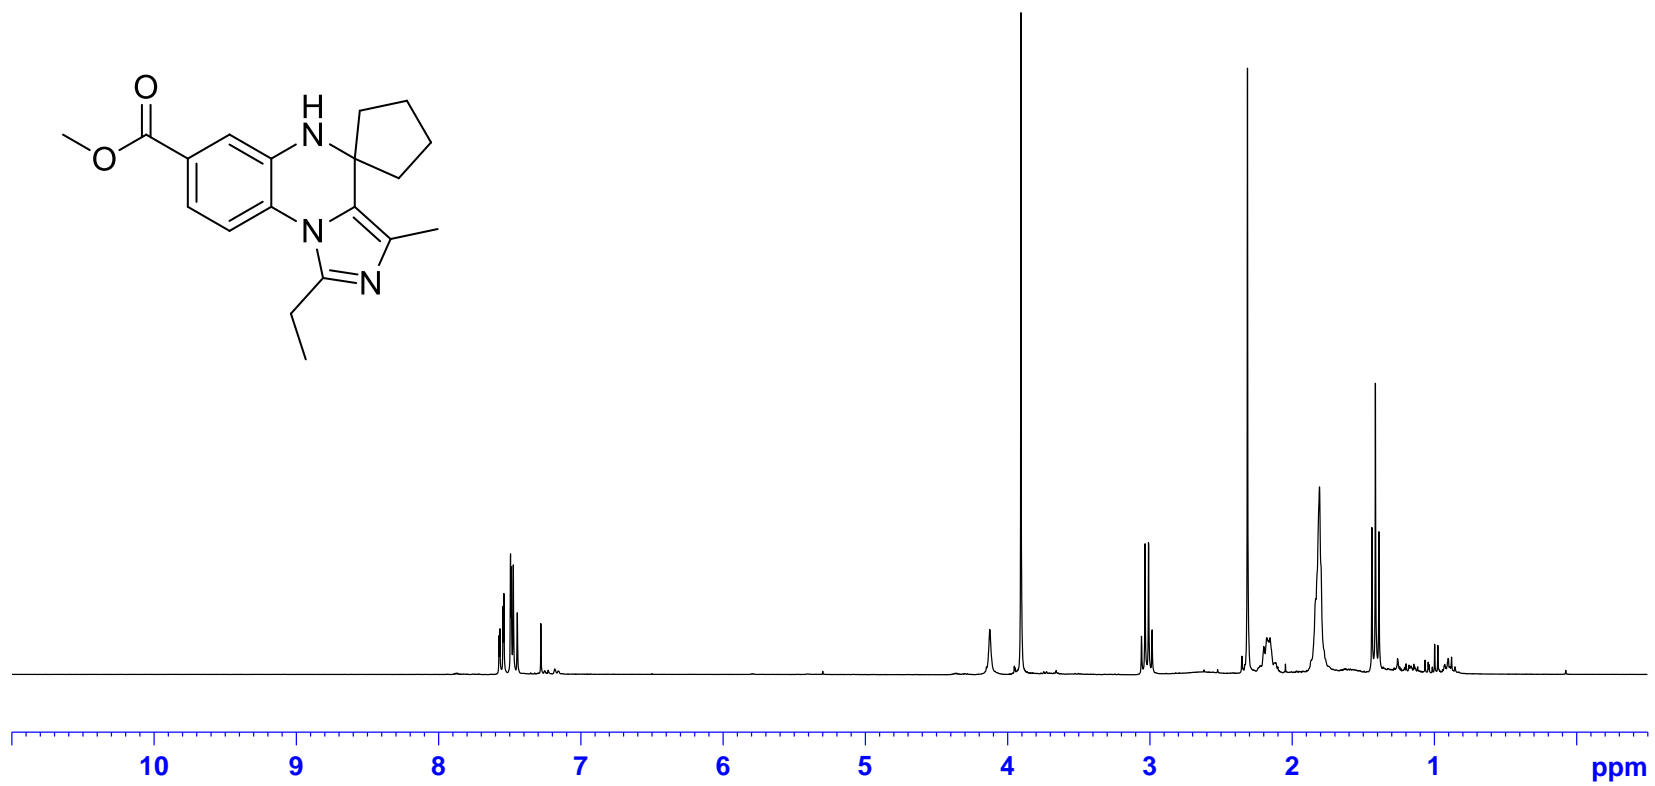

$^1\text{H}$  NMR spectrum (300 MHz) of compound **12q** in  $\text{CDCl}_3$

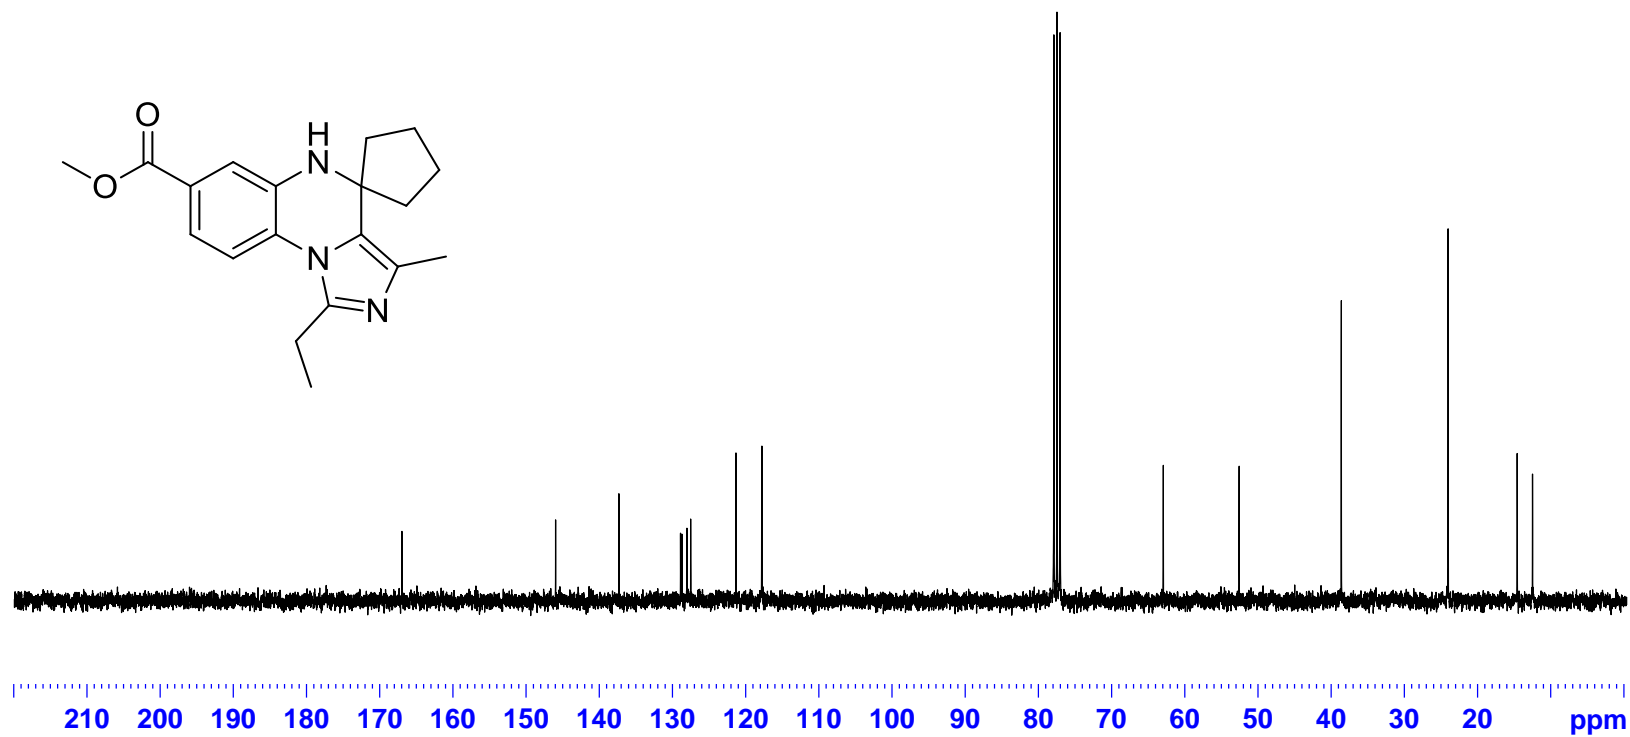

$^{13}\text{C}$  NMR spectrum (75 MHz) of compound **12q** in  $\text{CDCl}_3$

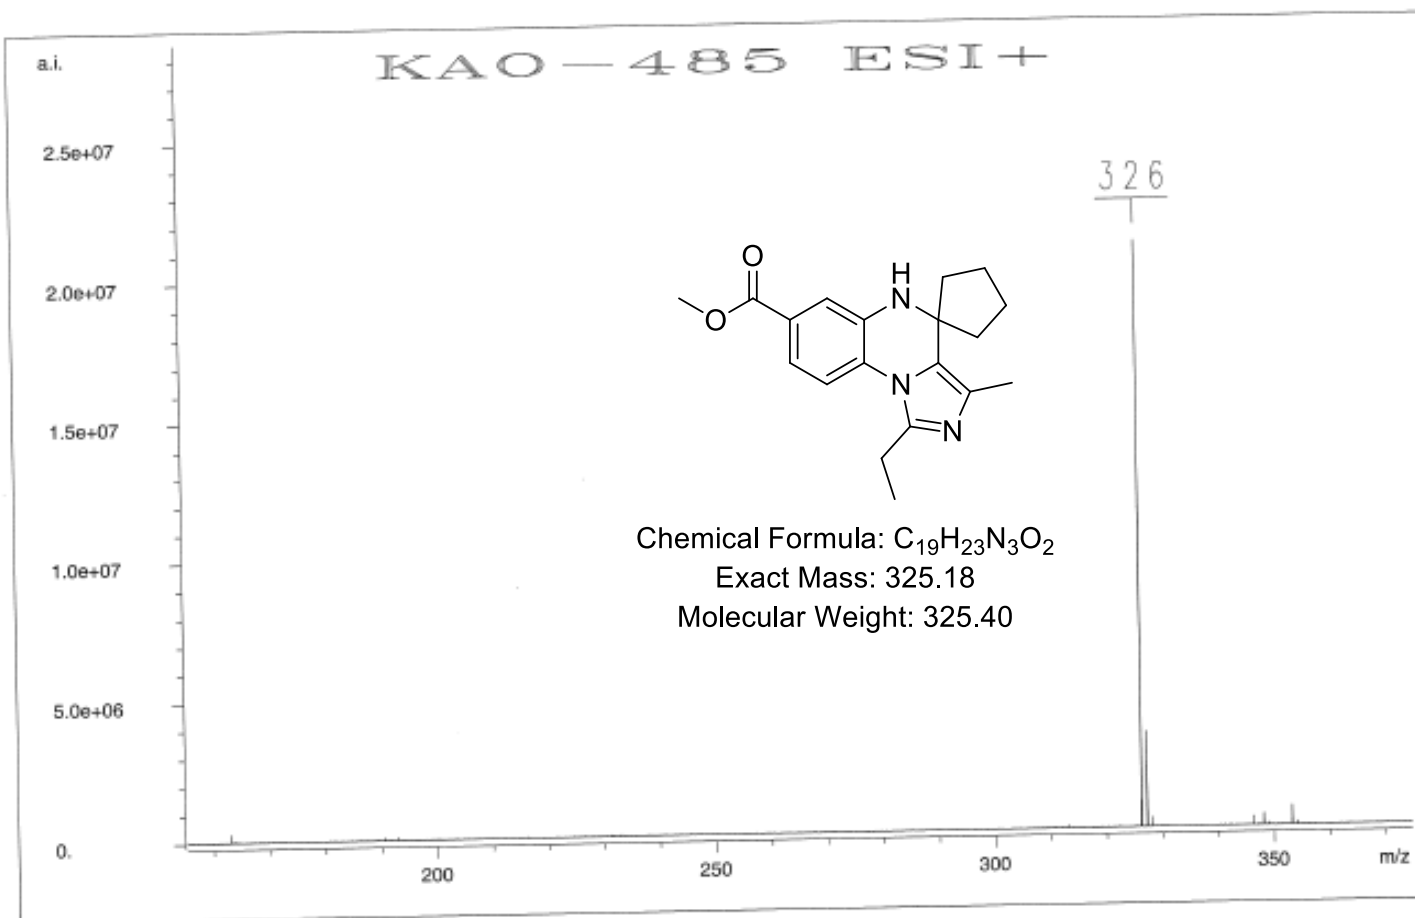

ESI-LRMS of compound **12q**

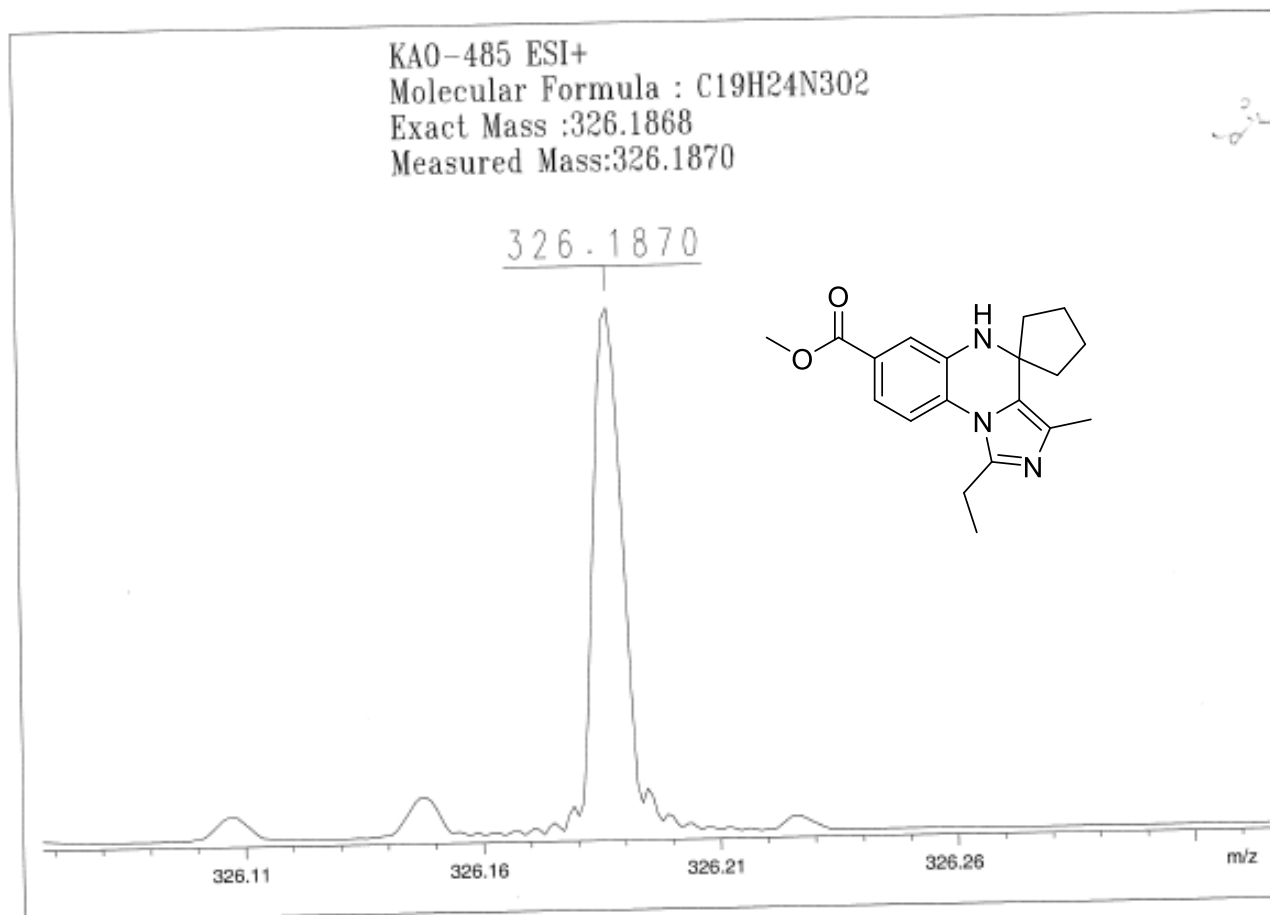

ESI-HRMS of compound **12q**

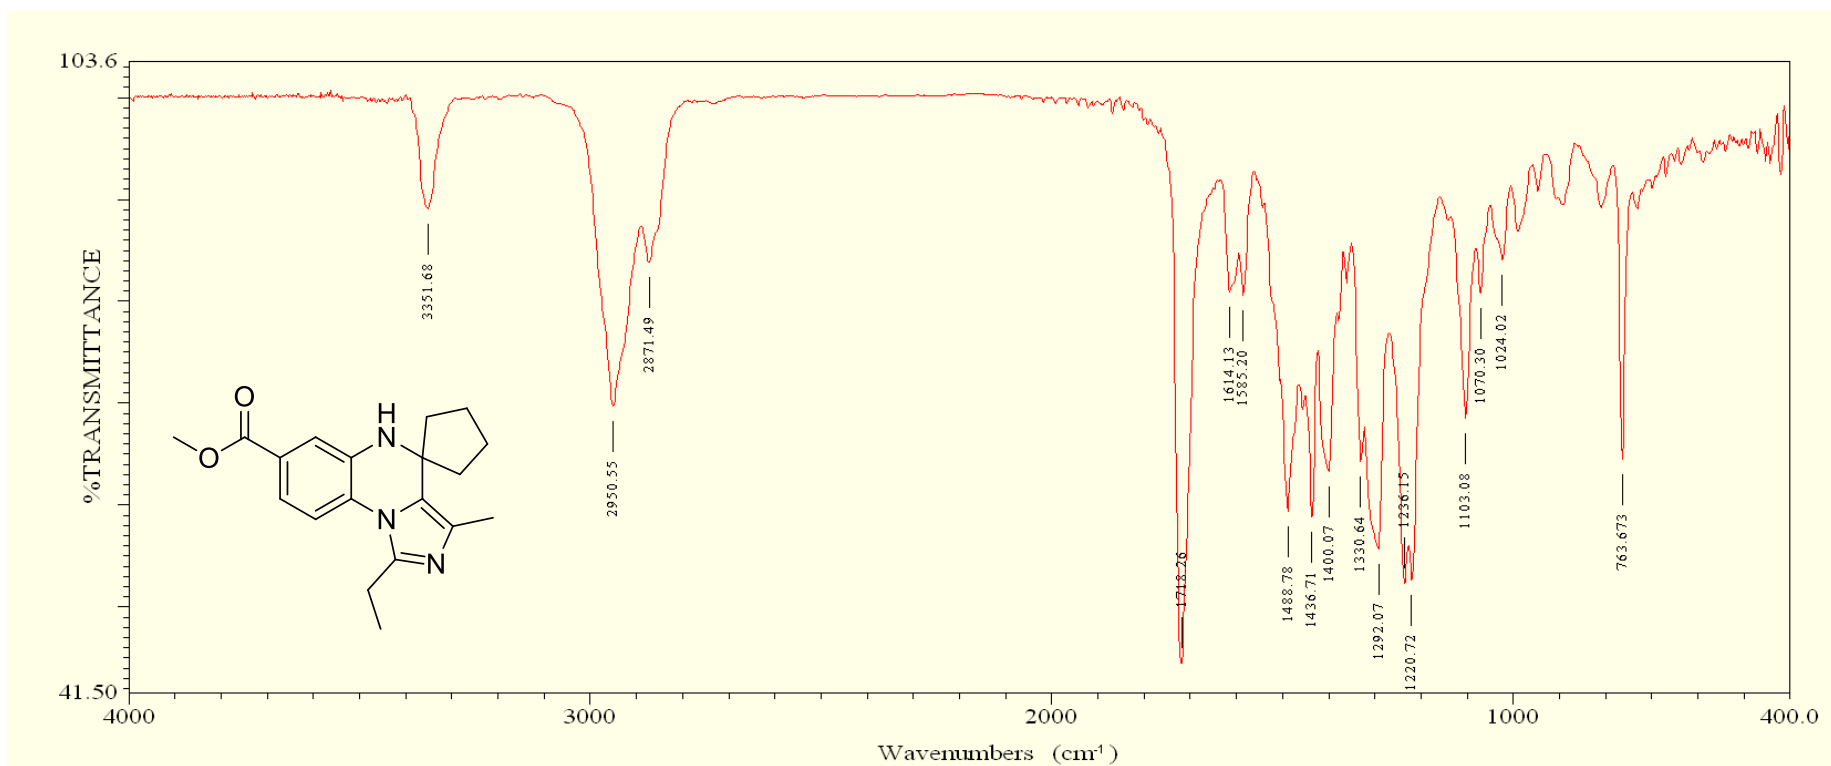

IR spectrum of compound **12q**

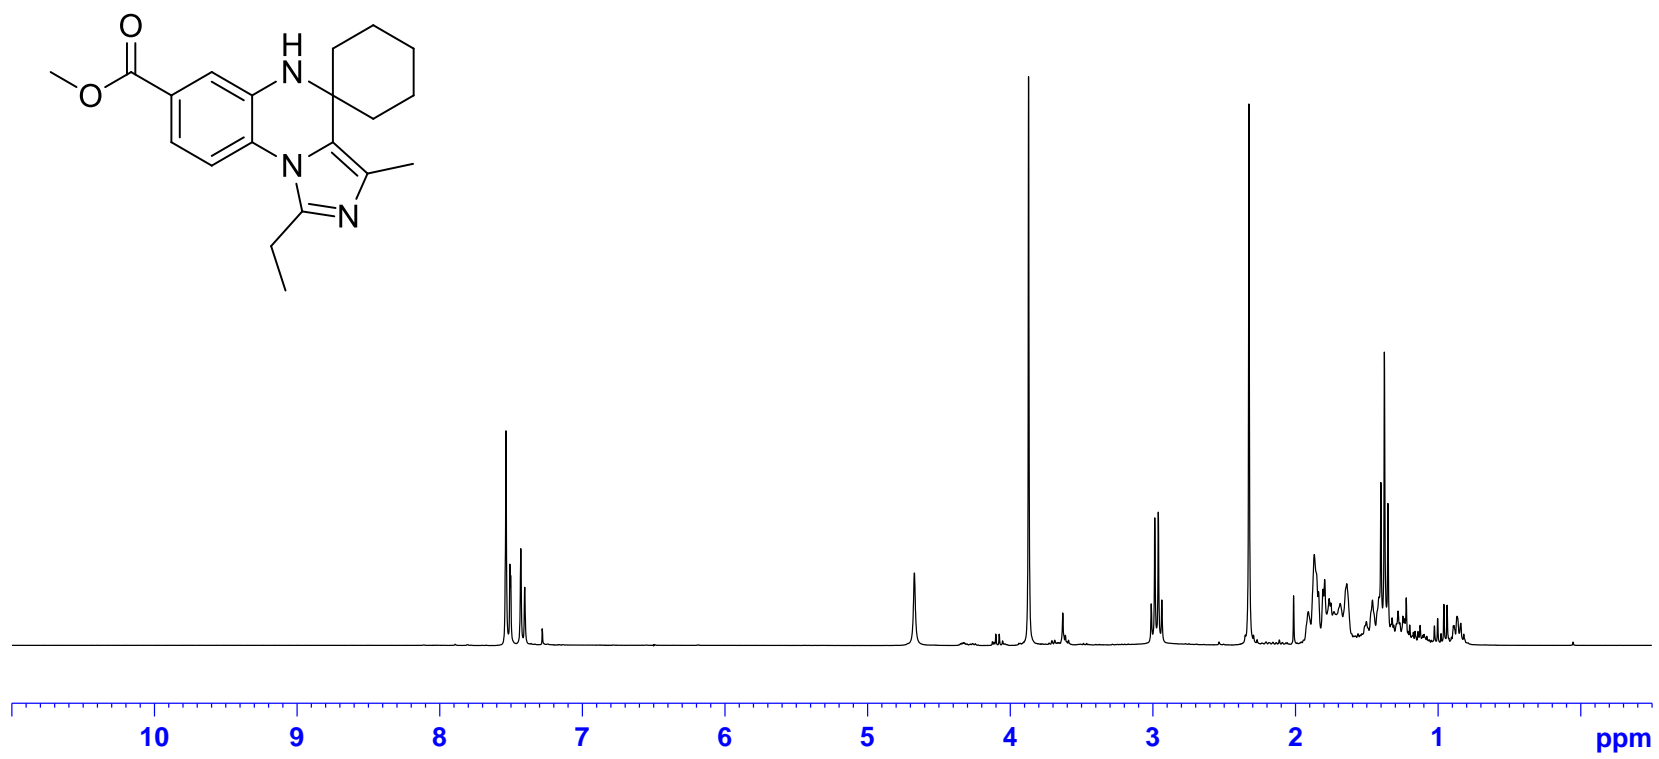

$^1\text{H}$  NMR spectrum (300 MHz) of compound **12r** in  $\text{CDCl}_3$

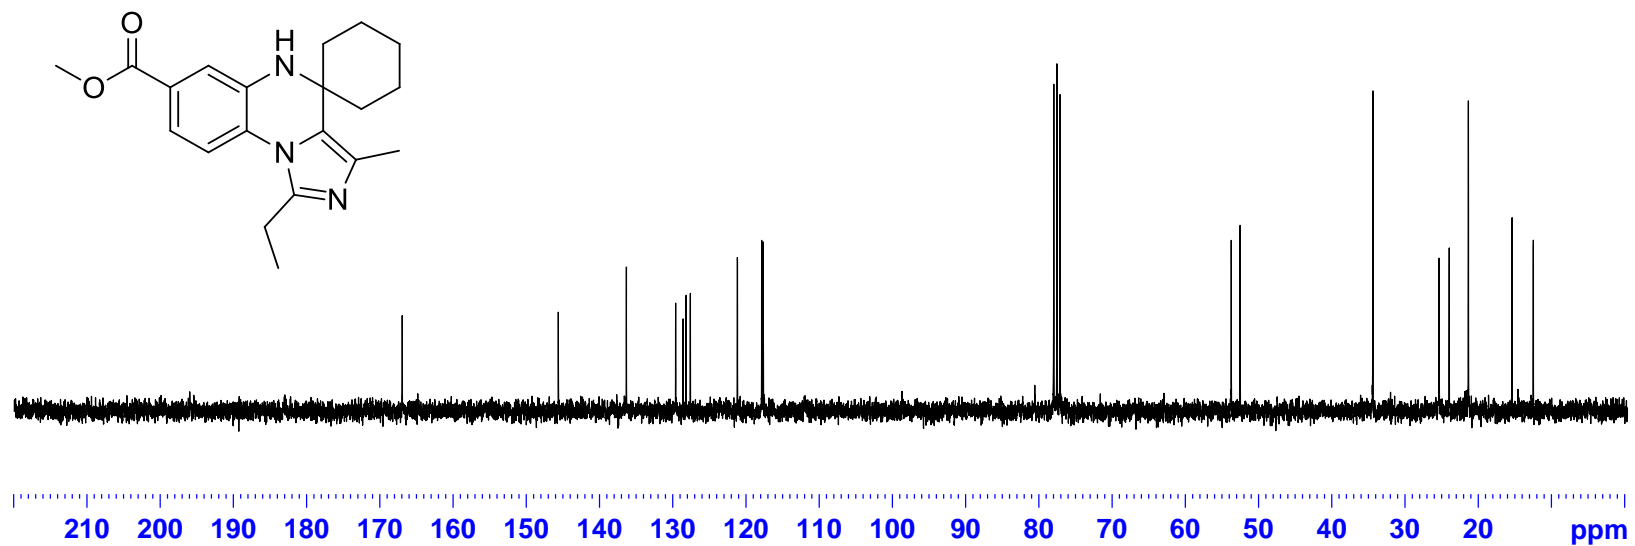

$^{13}\text{C}$  NMR spectrum (75 MHz) of compound **12r** in  $\text{CDCl}_3$



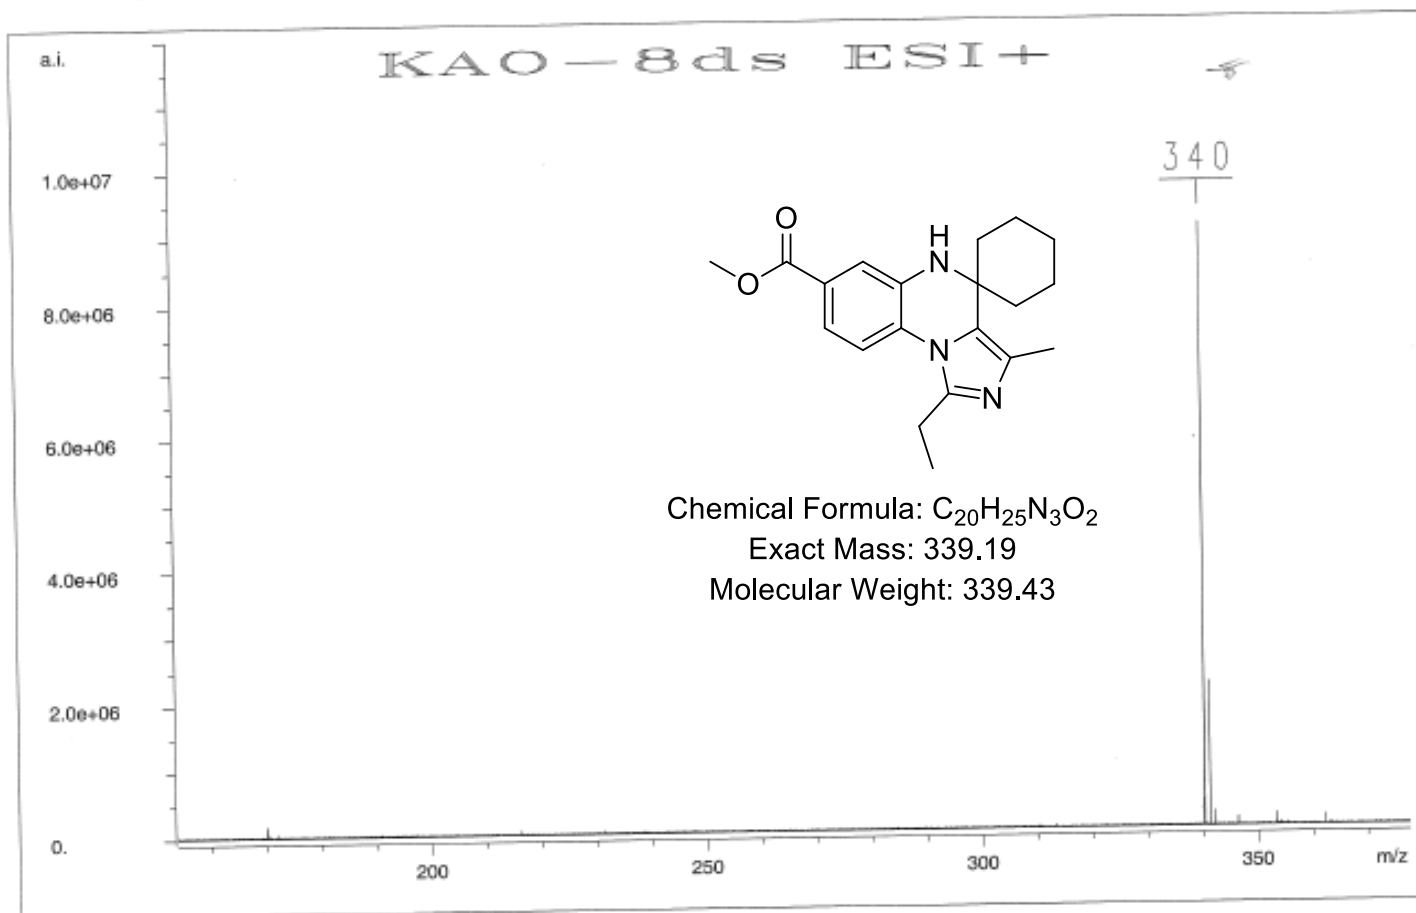

ESI-LRMS of compound **12r**

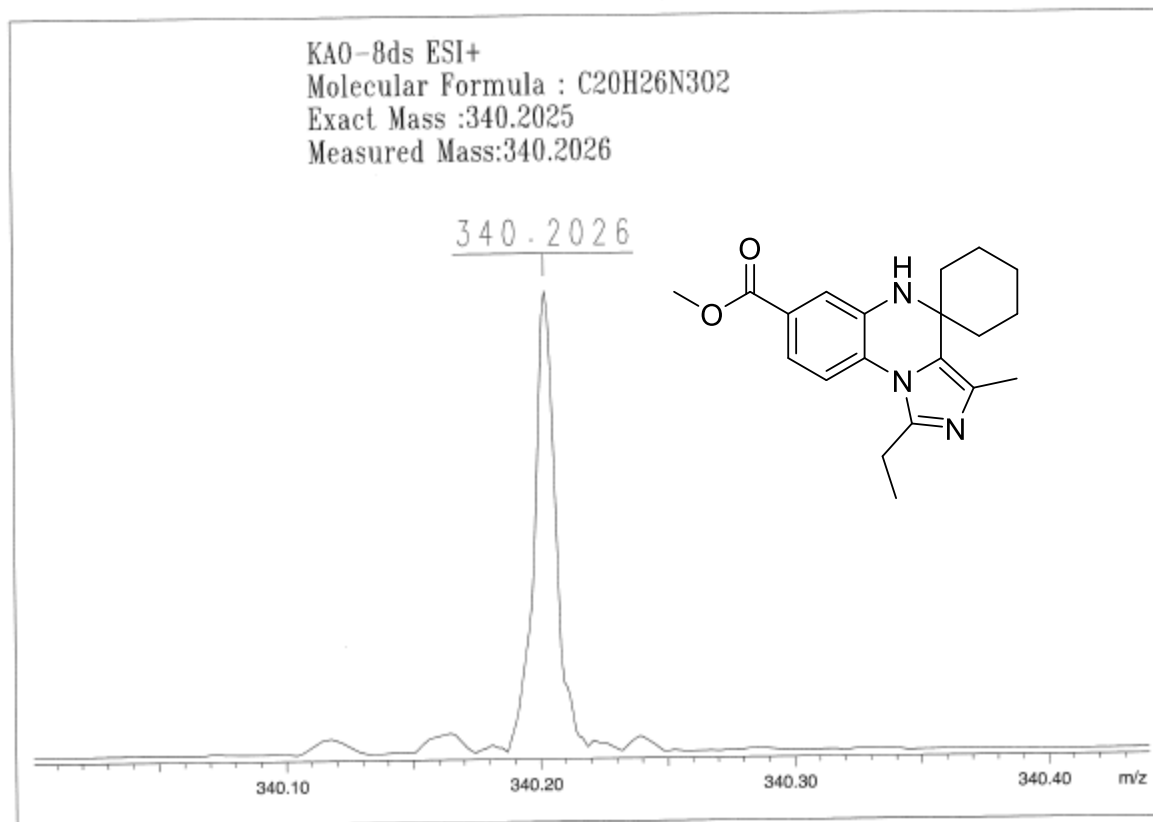

ESI-HRMS of compound **12r**

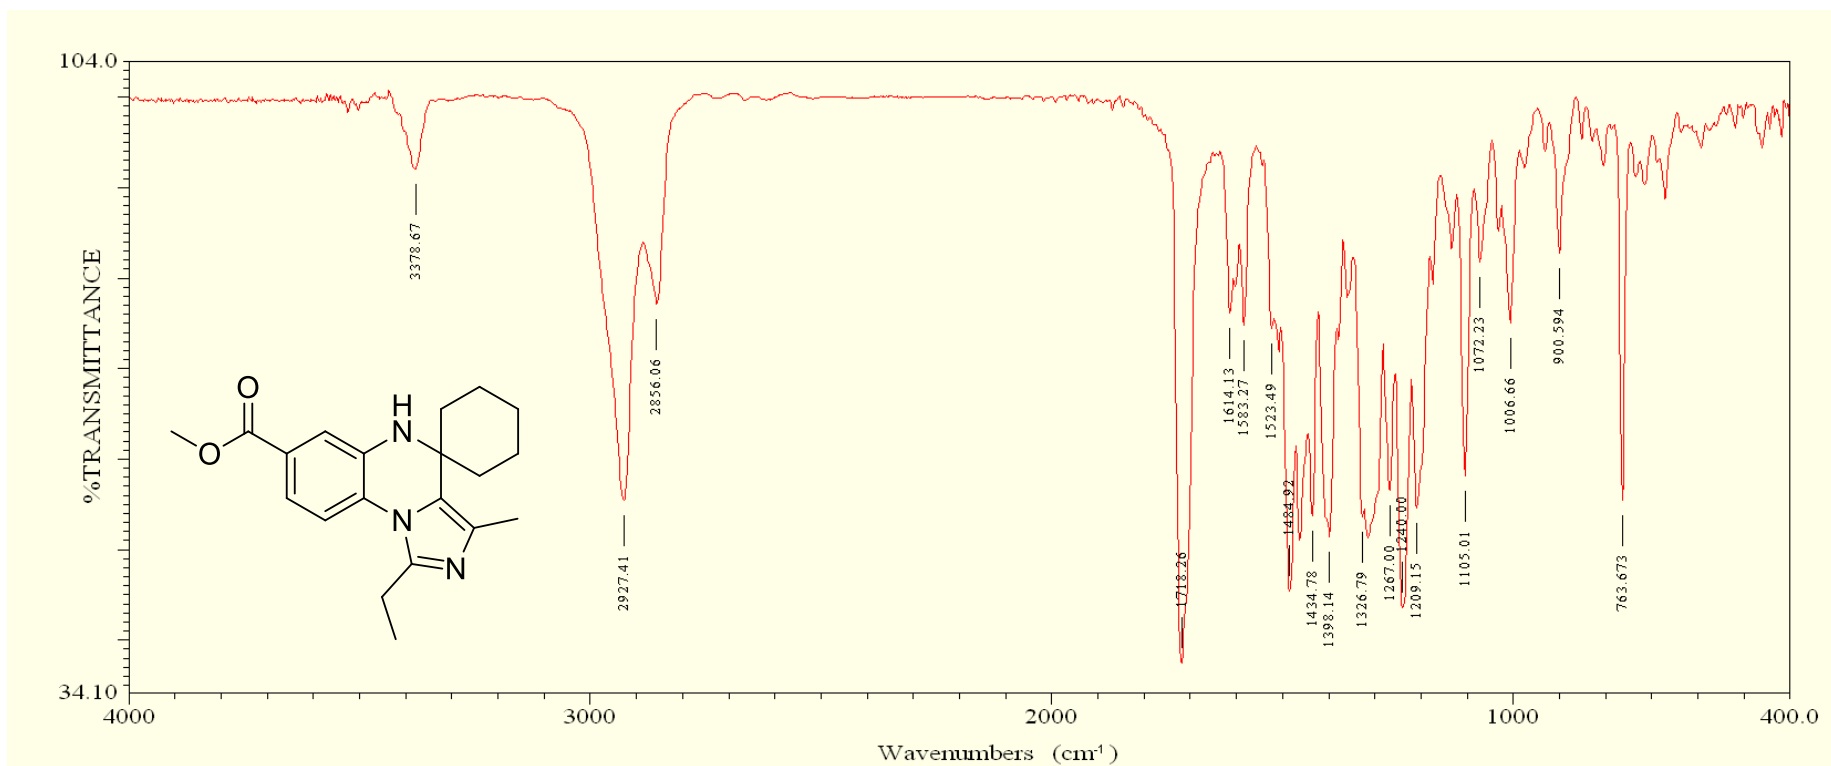

IR spectrum of compound **12r**

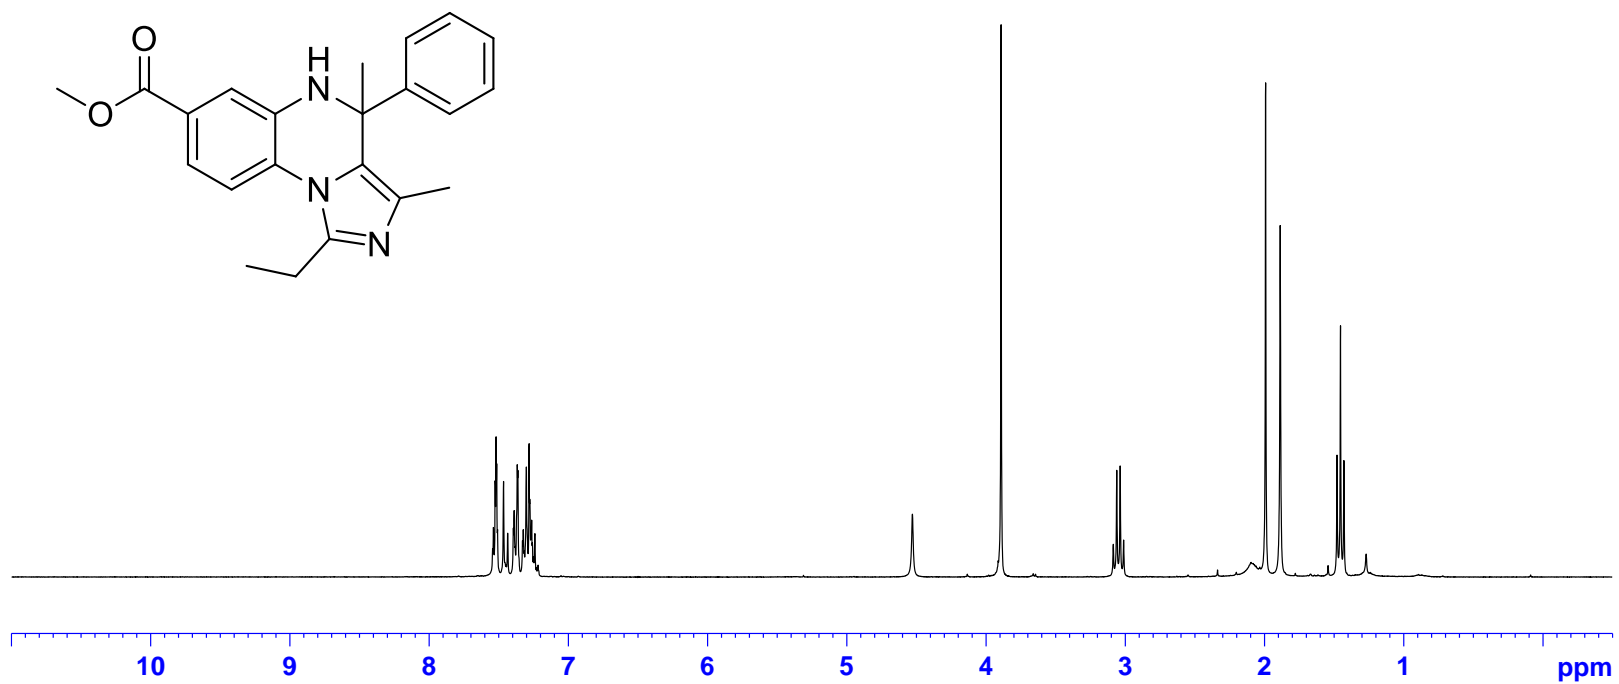

$^1\text{H}$  NMR spectrum (300 MHz) of compound **12s** in  $\text{CDCl}_3$

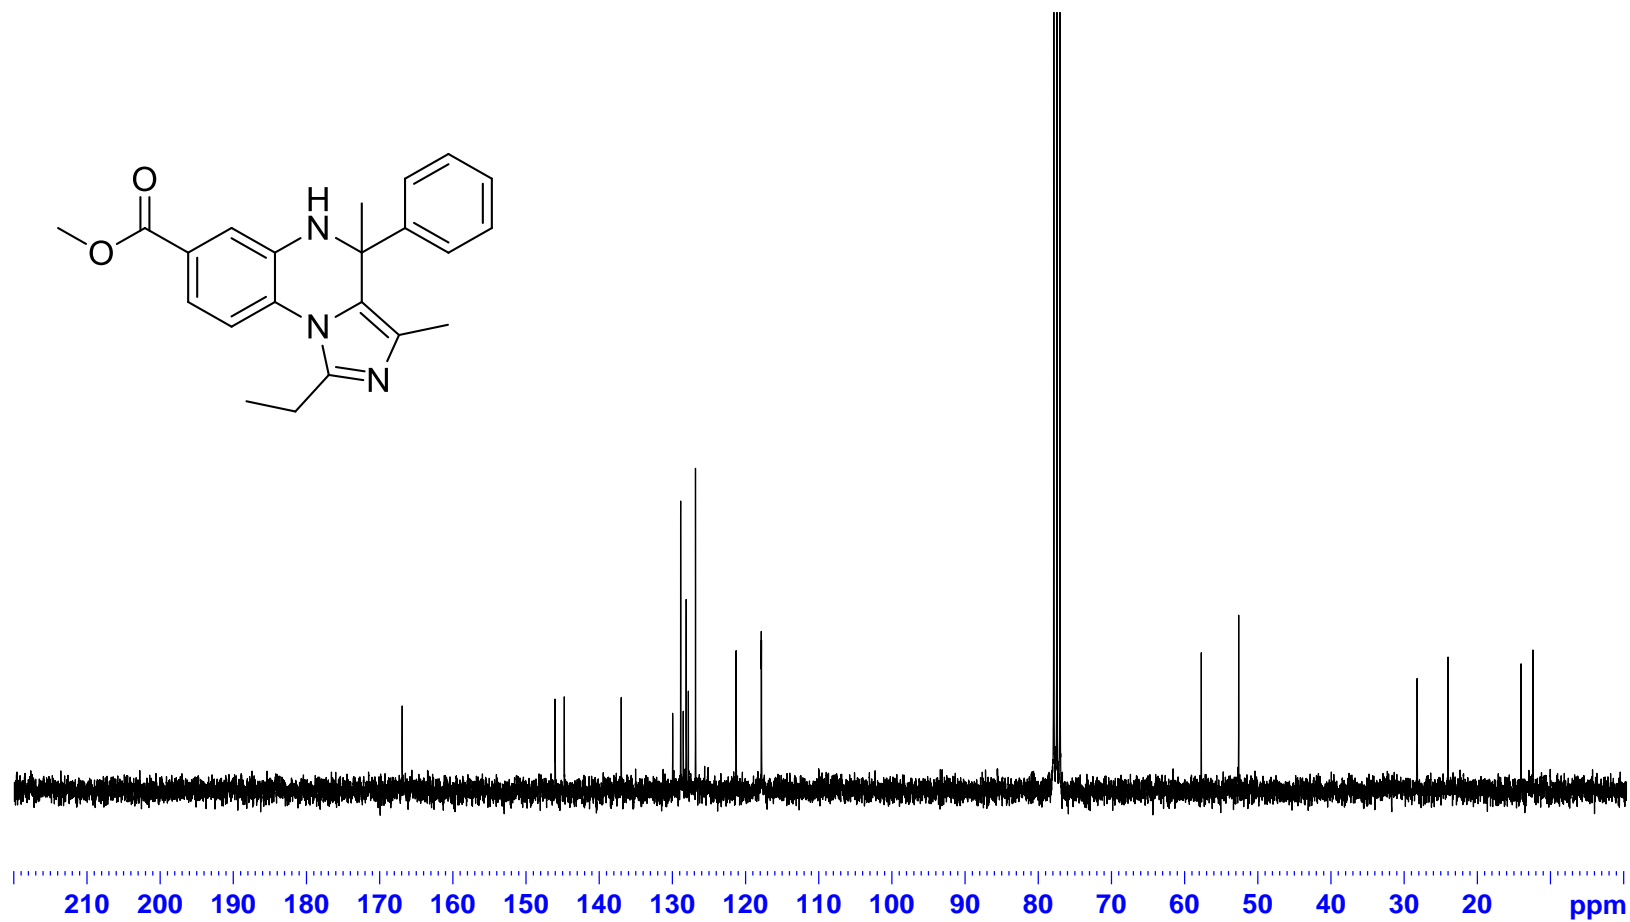

$^{13}\text{C}$  NMR spectrum (75 MHz) of compound **12s** in  $\text{CDCl}_3$

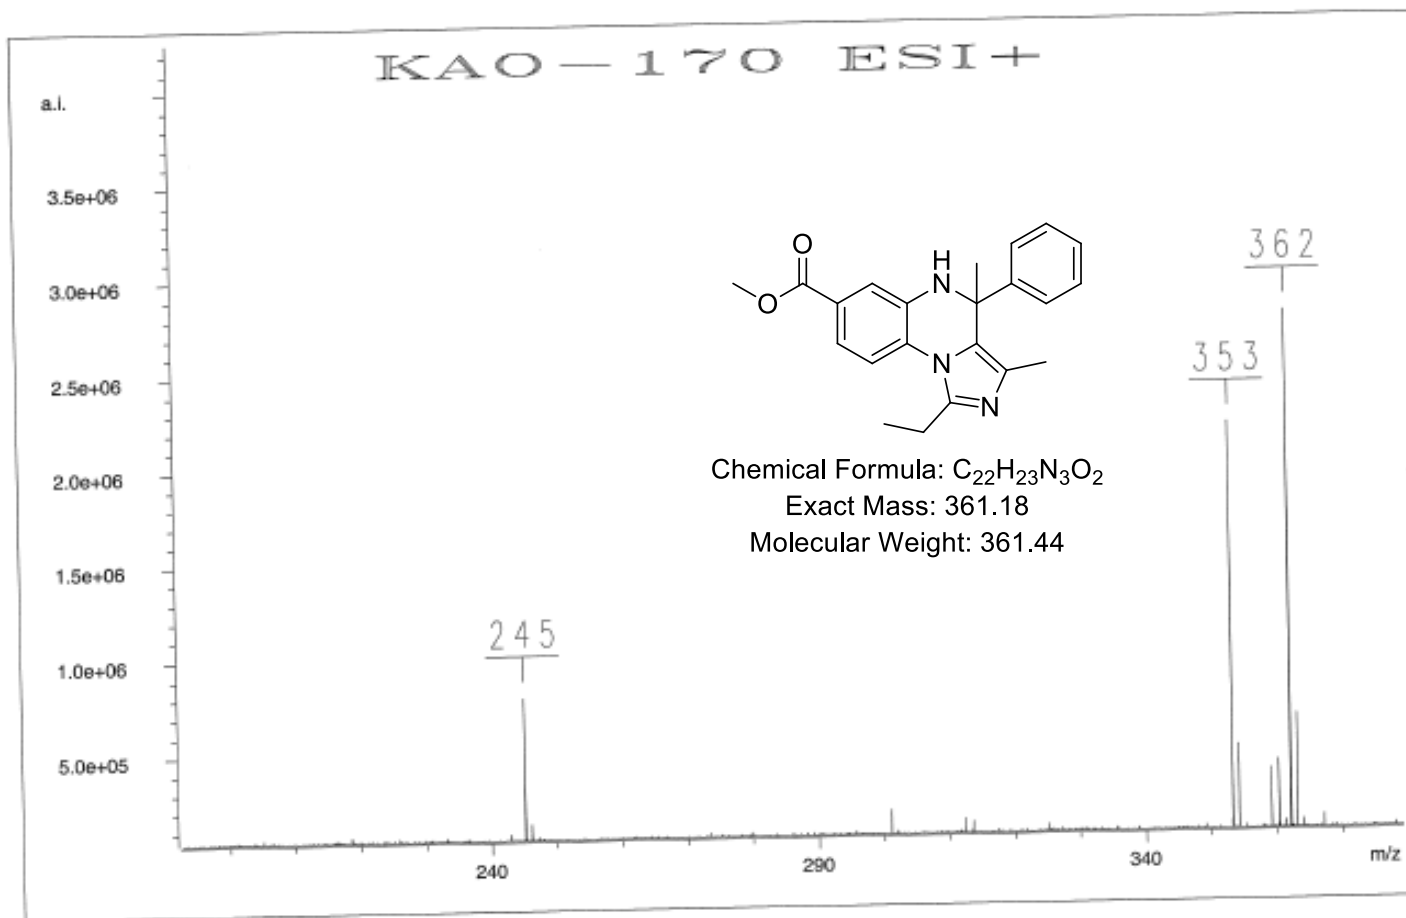

ESI-LRMS of compound **12s**

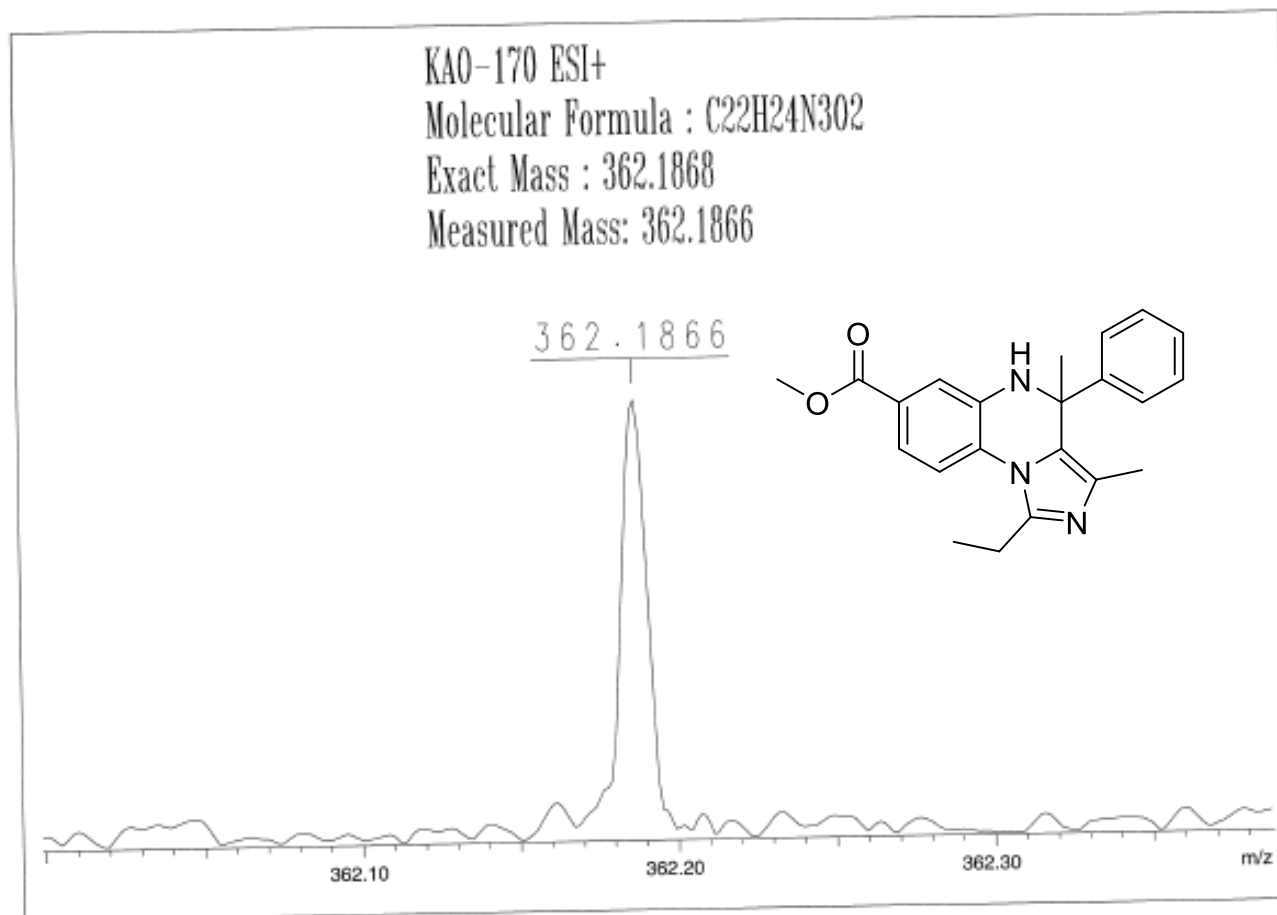

ESI-HRMS of compound **12s**

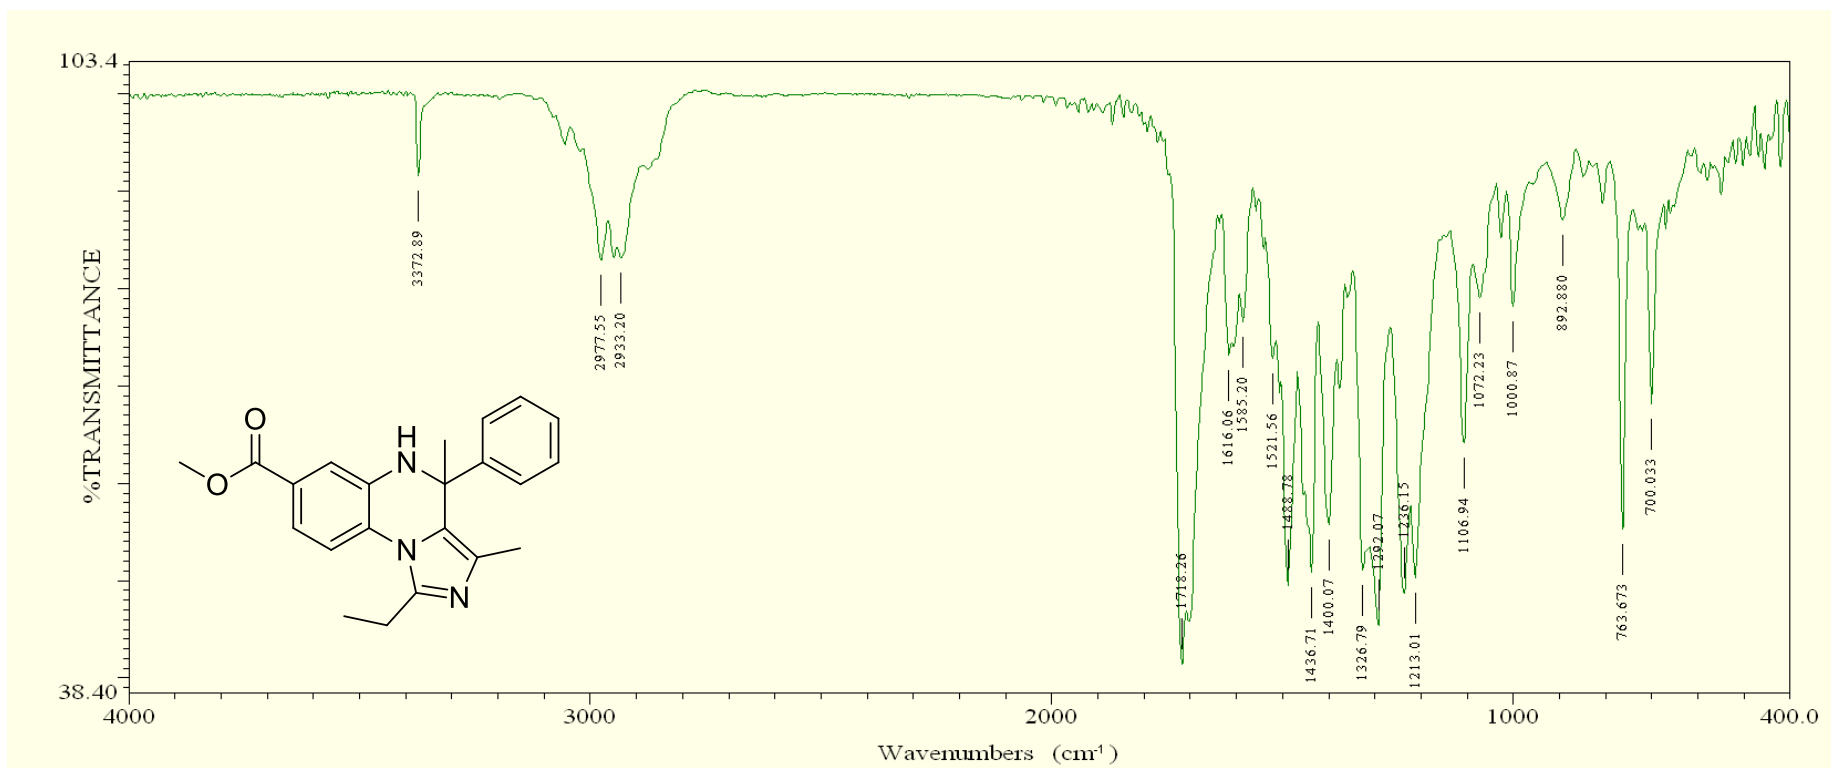

IR spectrum of compound 12s



8.  $^1\text{H}$  NMR,  $^{13}\text{C}$  NMR, LRMS and HRMS of Compound 13a-i

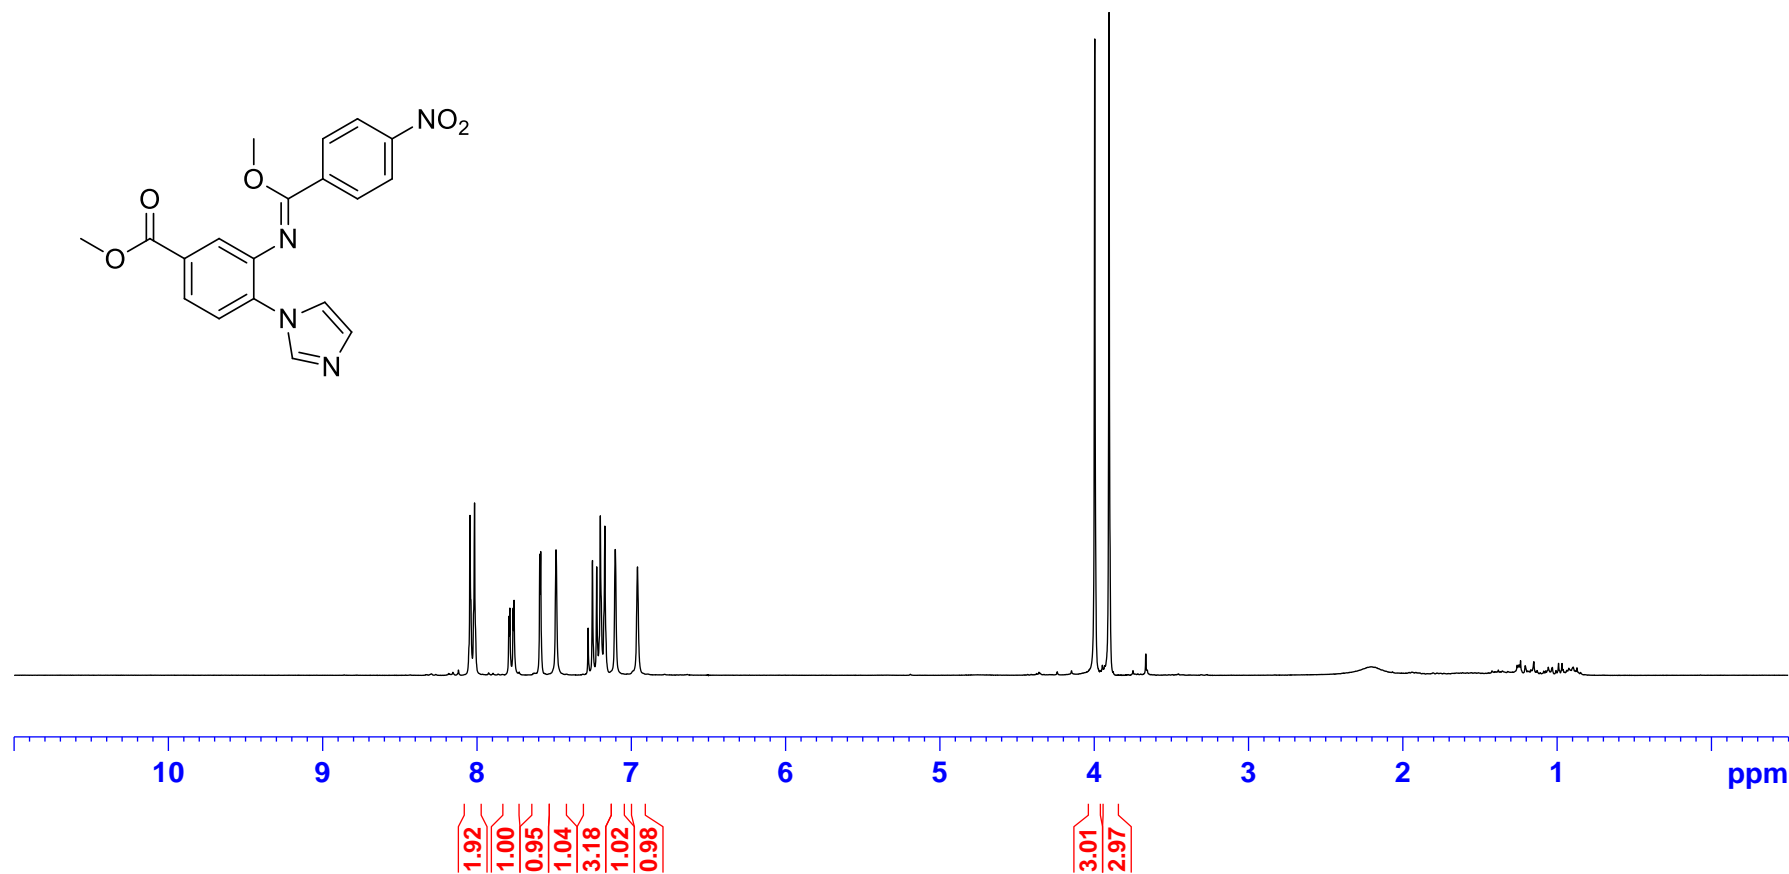

$^1\text{H}$  NMR spectrum (300 MHz) of compound **13a** in  $\text{CDCl}_3$

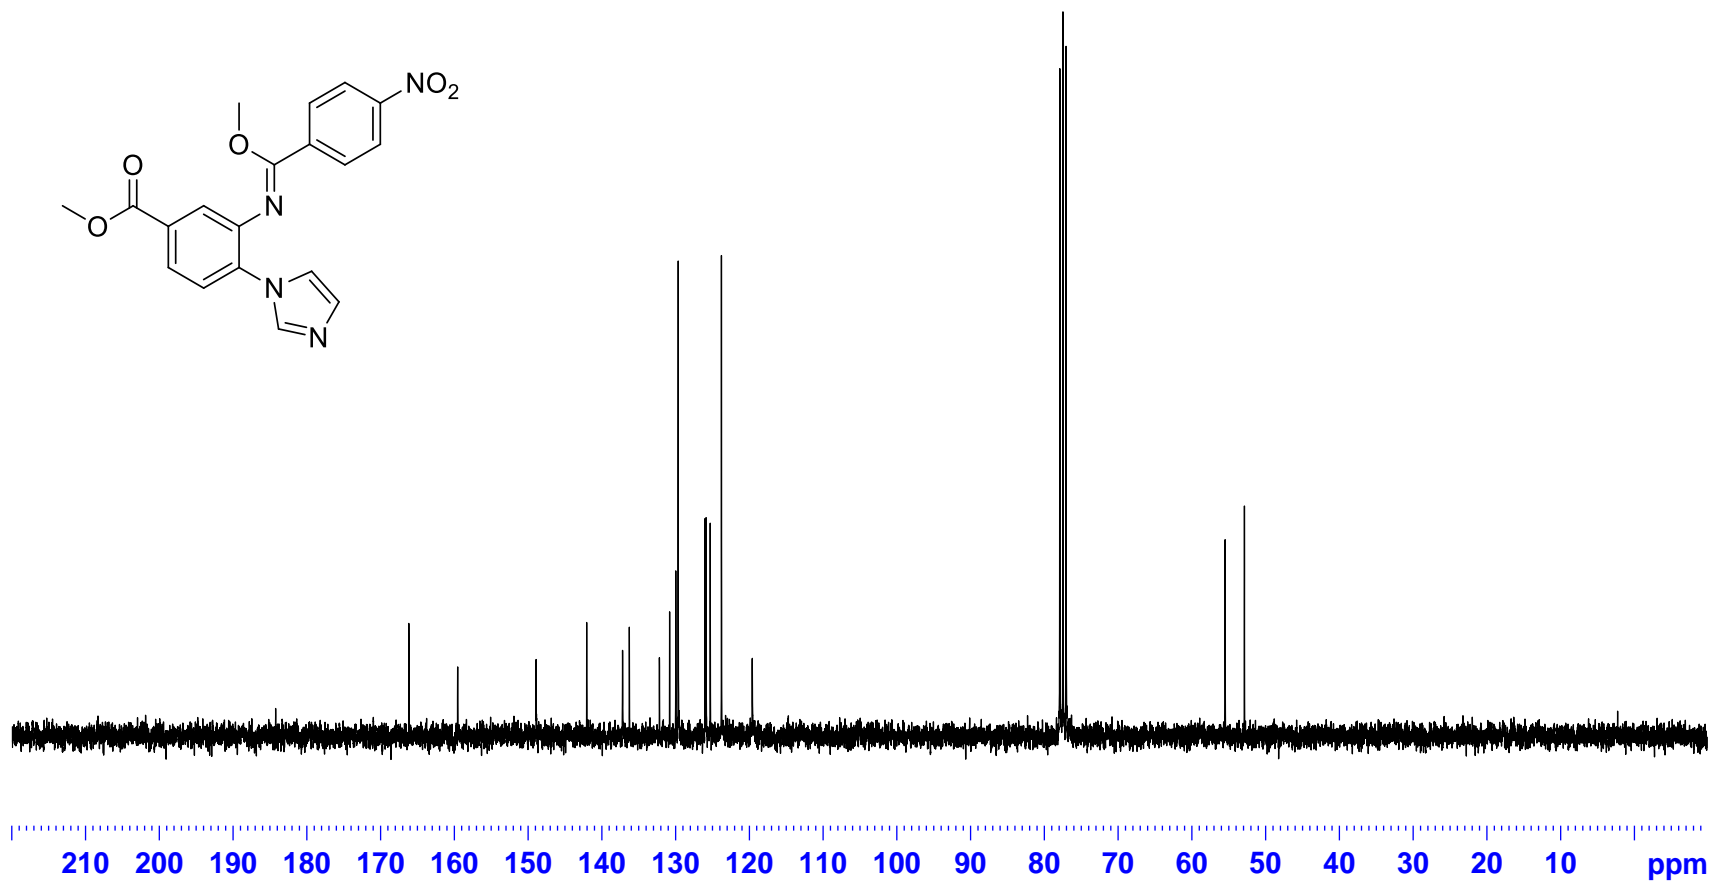

$^{13}\text{C}$  NMR spectrum (75 MHz) of compound **13a** in  $\text{CDCl}_3$

ib-N5-068

20130705-67 20 (1.370) Cn (Cen,2, 80.00, Ht); Sb (3,50.00); Cm (17:24-2:12x3.000)

Scan ES+  
1.28e8

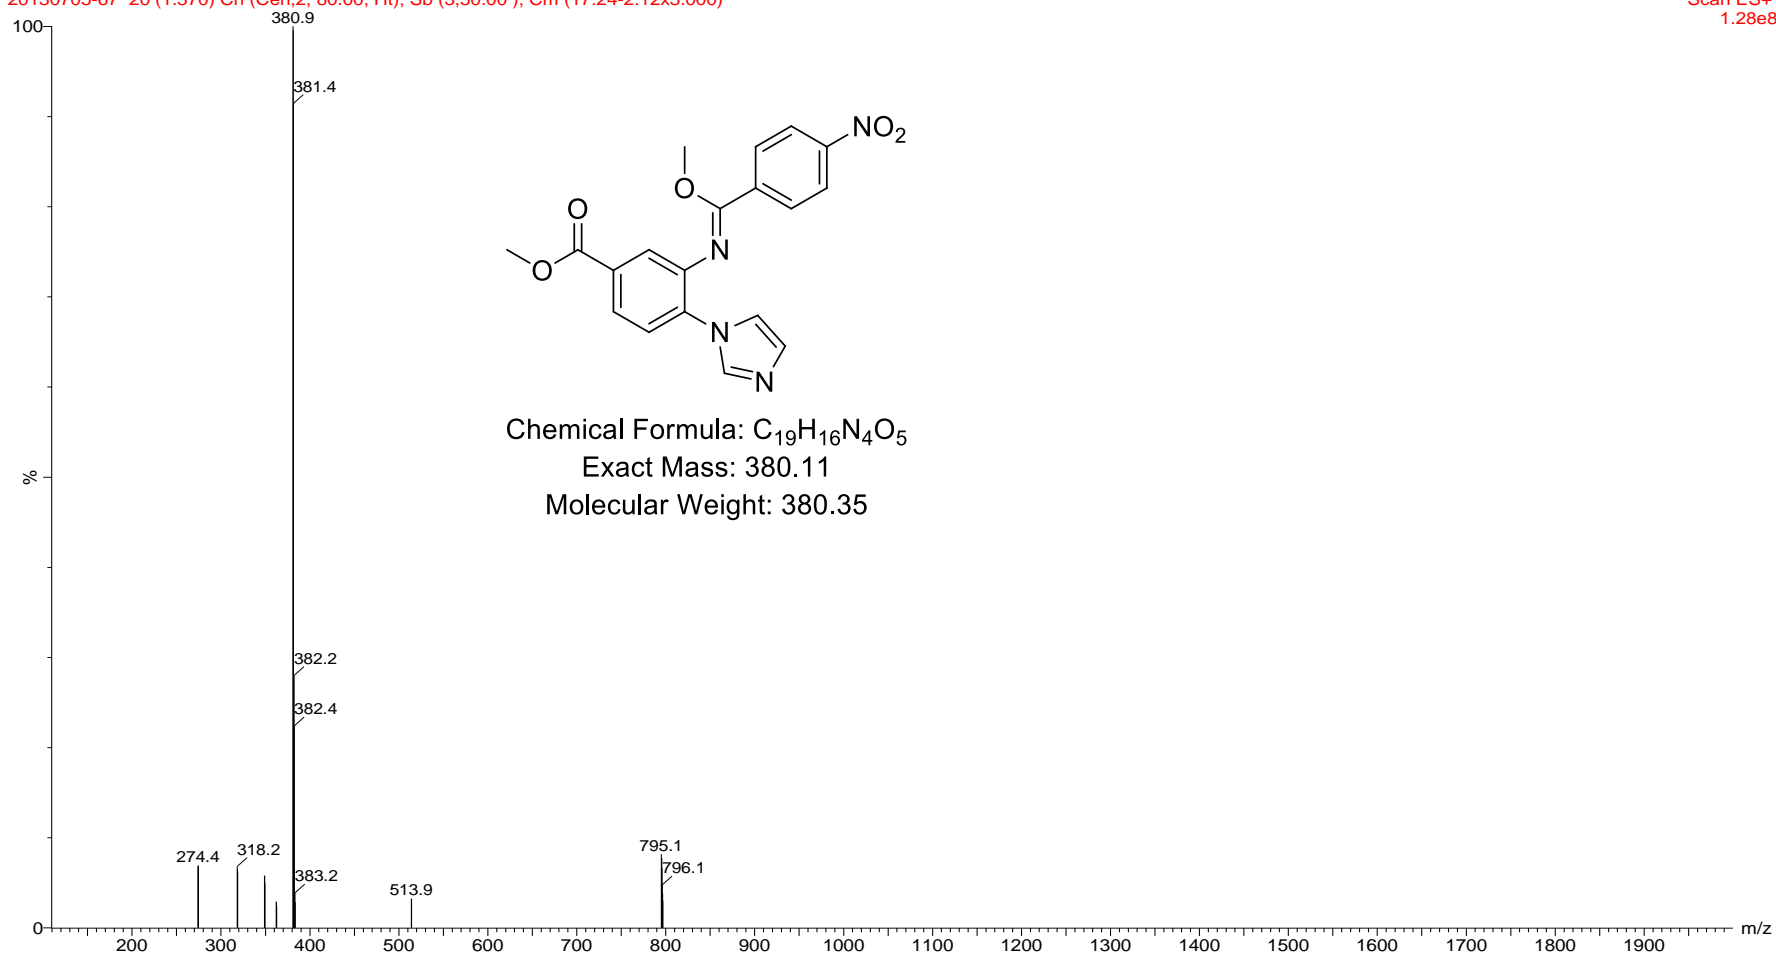

ESI-LRMS of compound **13a**

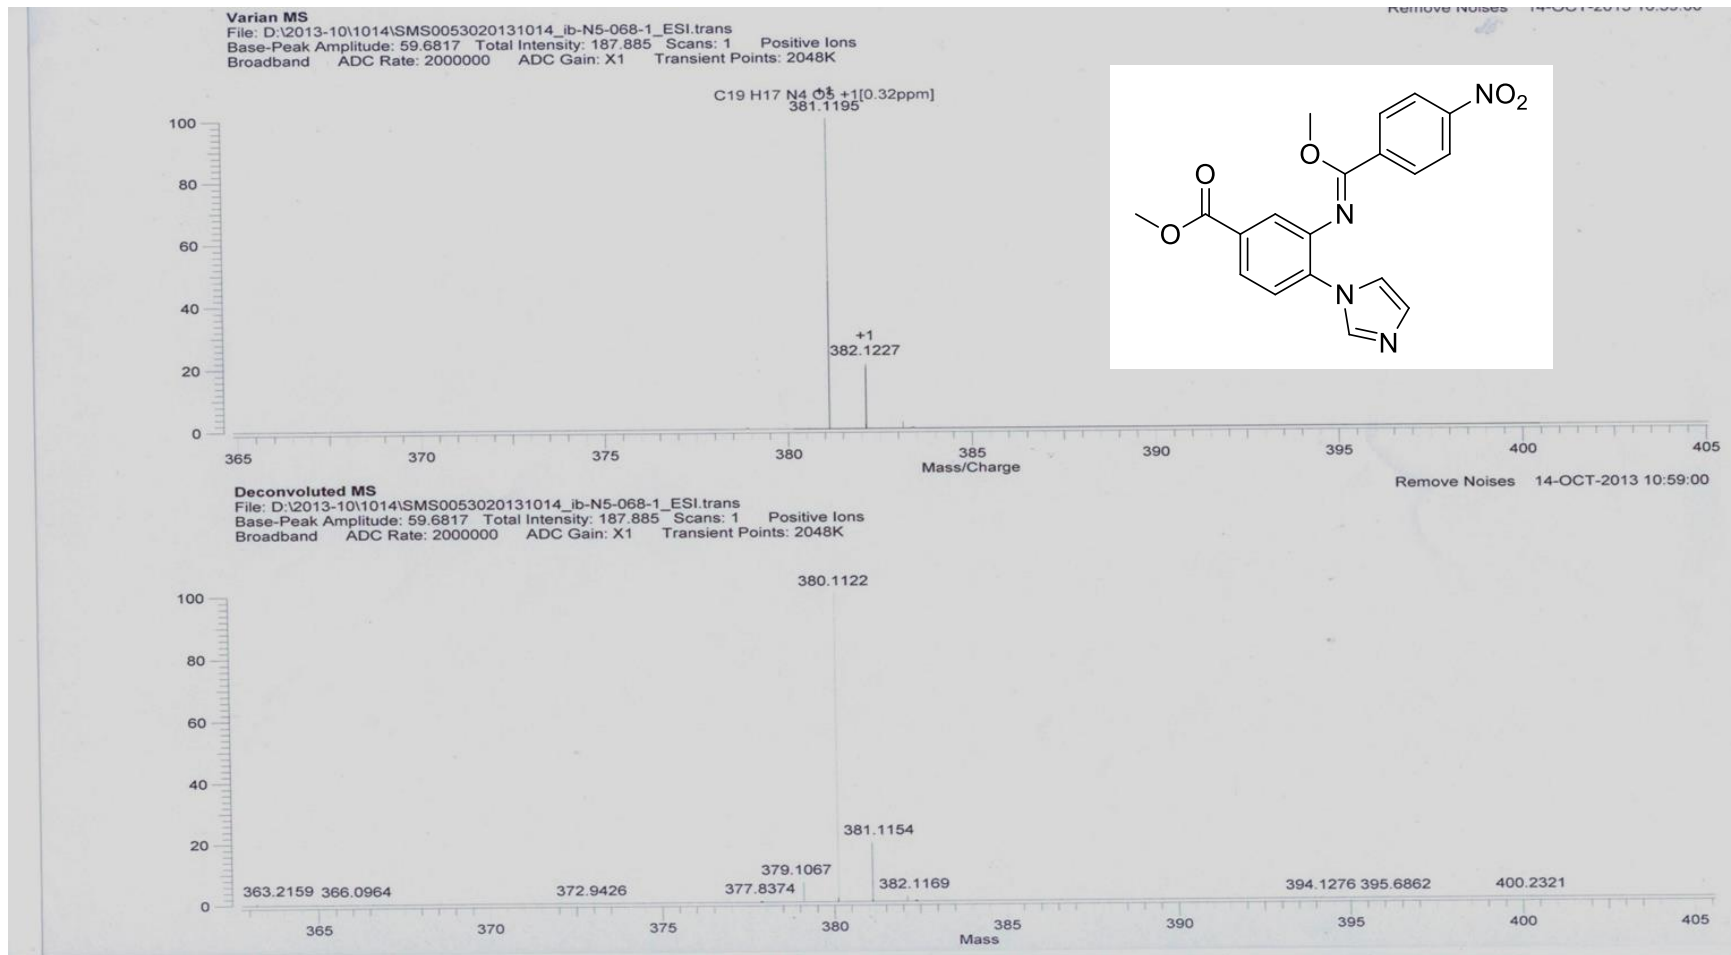

ESI-HRMS of compound **13a**

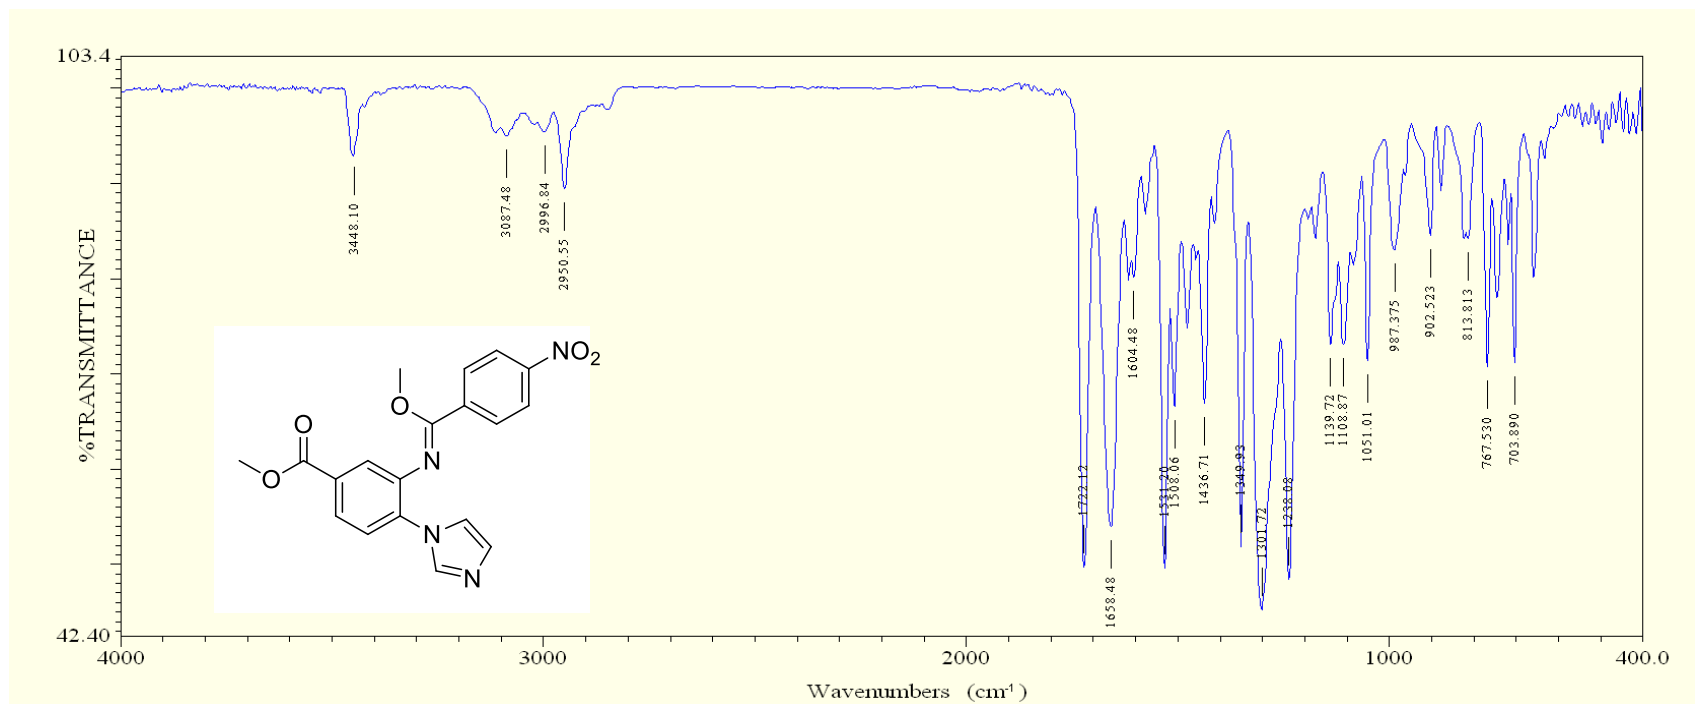

IR spectrum of compound **13a**

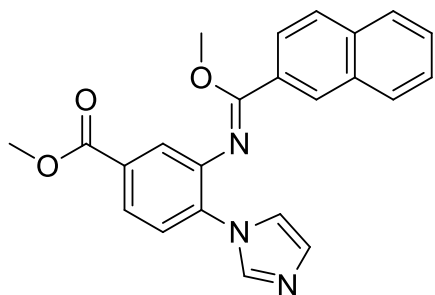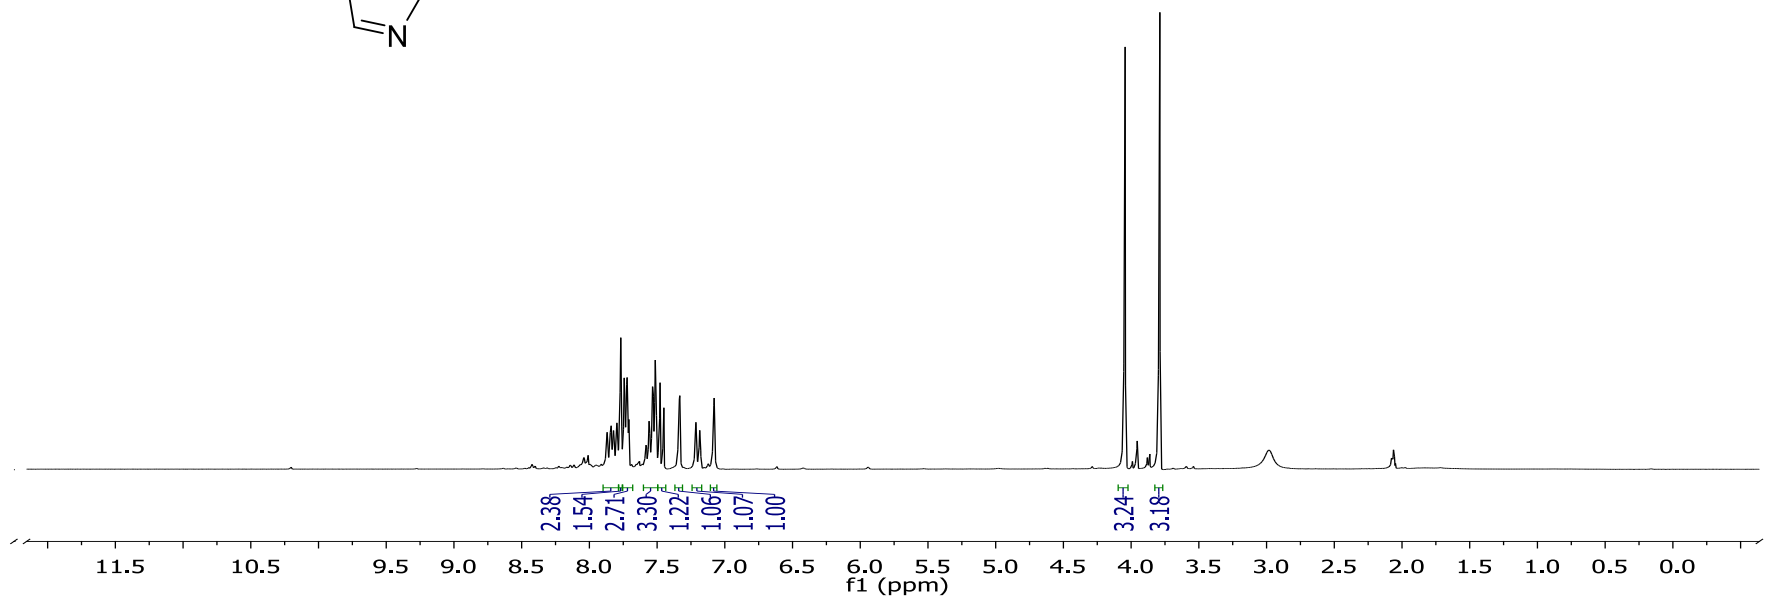

$^1\text{H}$  NMR spectrum (400 MHz) of compound **13b** in Acetone- $\text{d}_6$

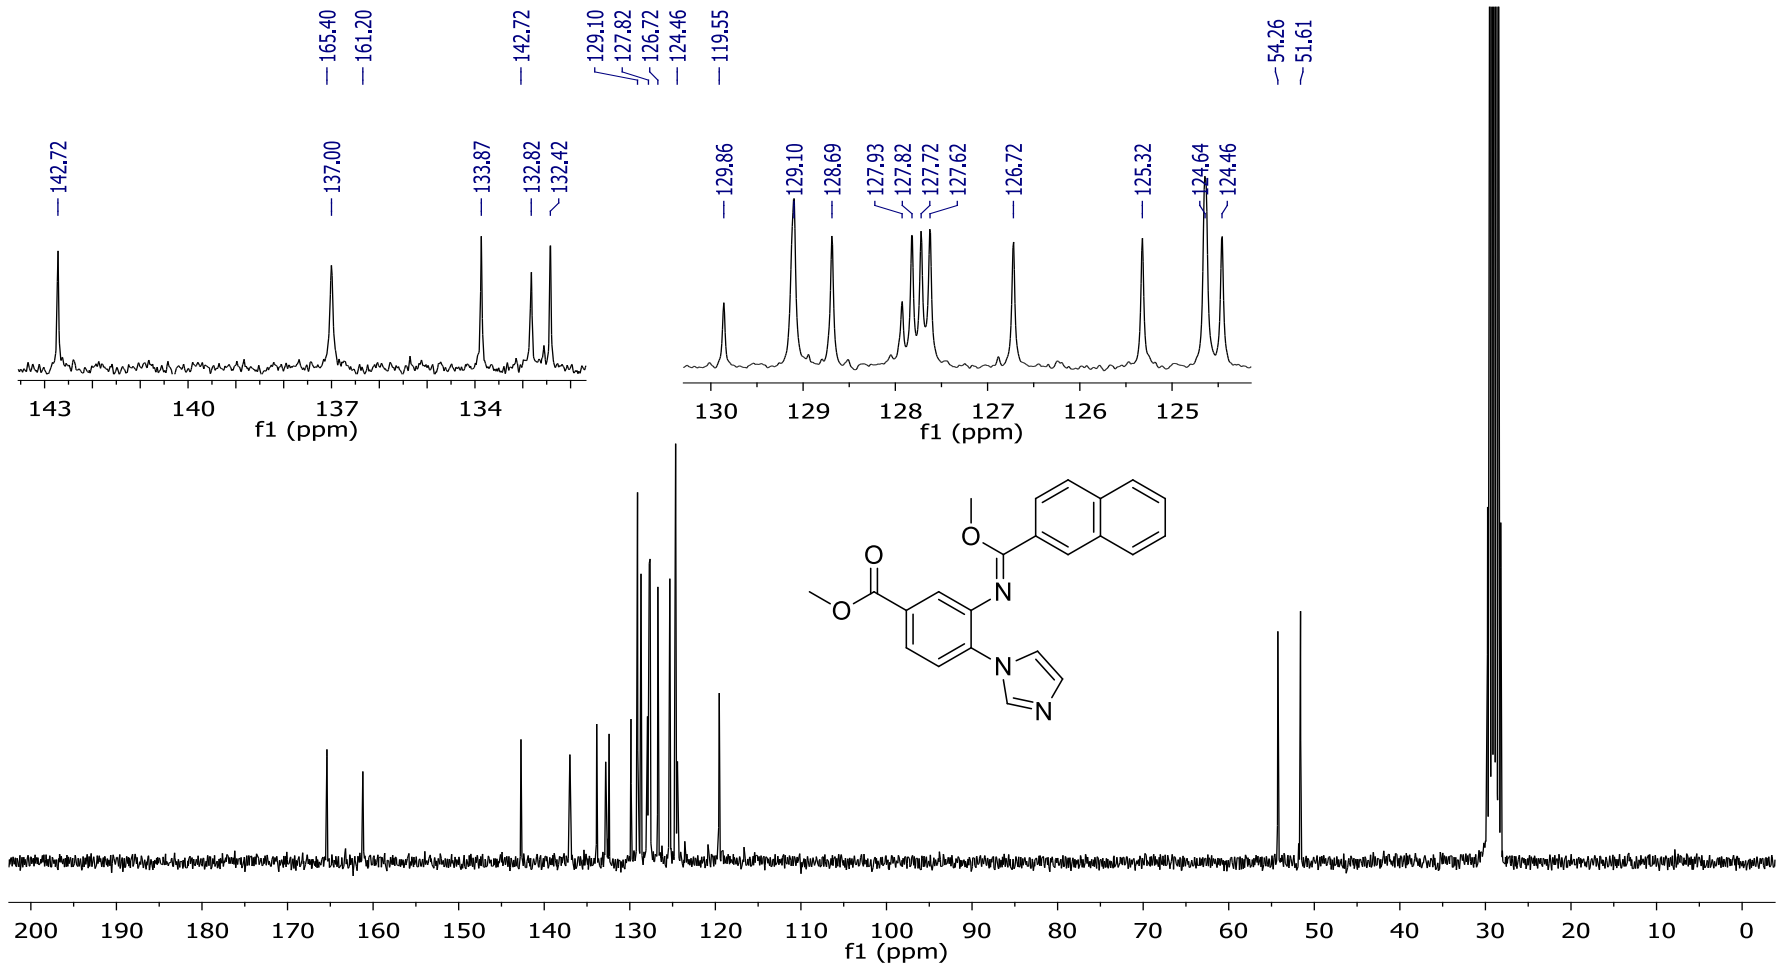

$^{13}\text{C}$  NMR spectrum (101 MHz) of compound **13b** in Acetone- $\text{d}_6$

ib-N5-092

2013080925 21 (1.438) Cn (Cen,2, 80.00, Ht); Sm (Mn, 2x0.75); Sb (3,50.00); Cm (17:22-1:14x3.000)

Scan ES+  
1.31e8

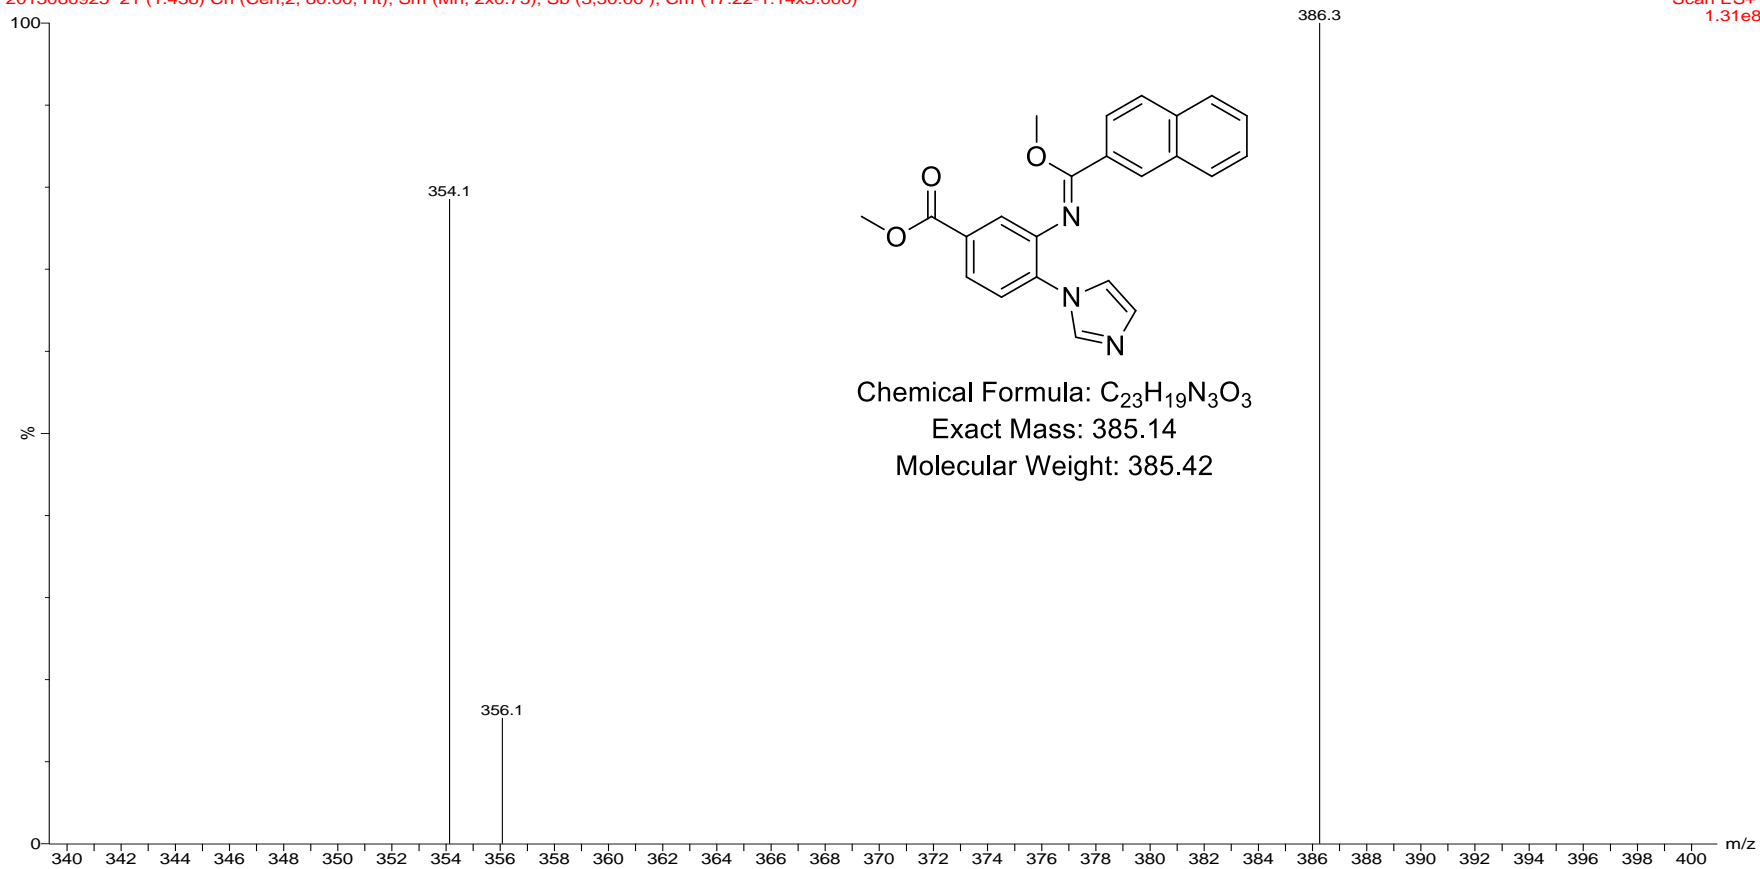

ESI-LRMS of compound **13b**



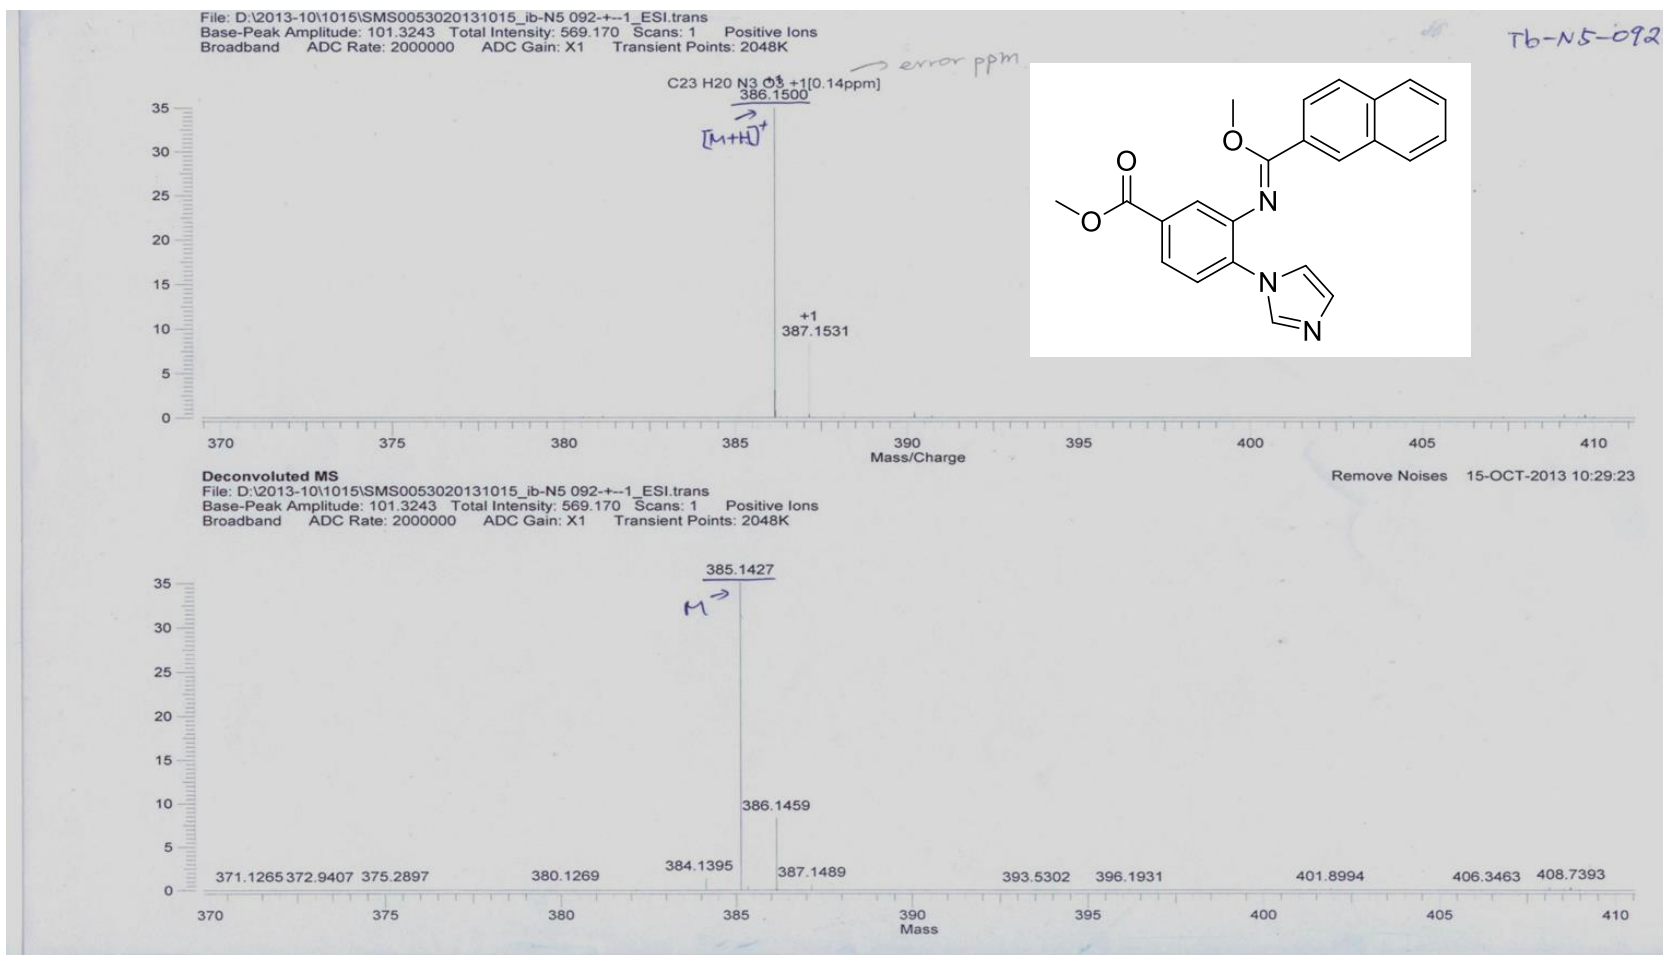

ESI-HRMS of compound **13b**

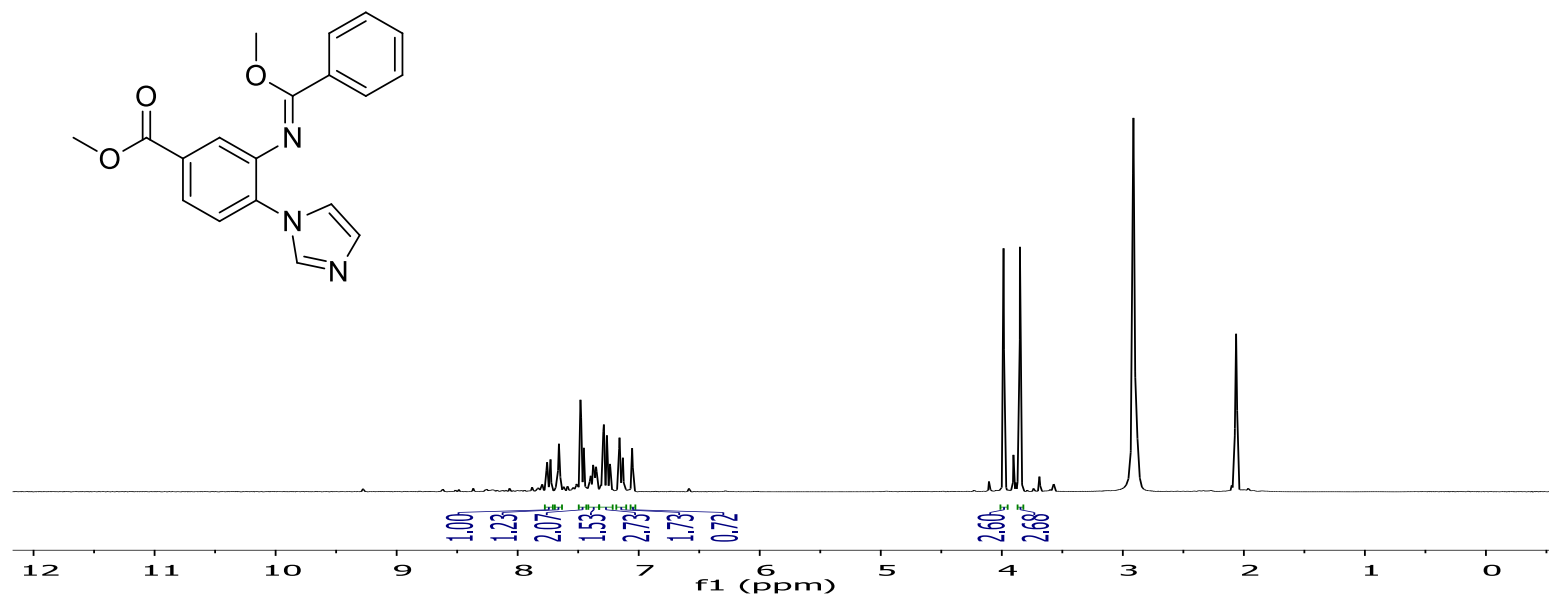

$^1\text{H}$  NMR spectrum (400 MHz) of compound **13c** in  $\text{Acetone-d}_6$

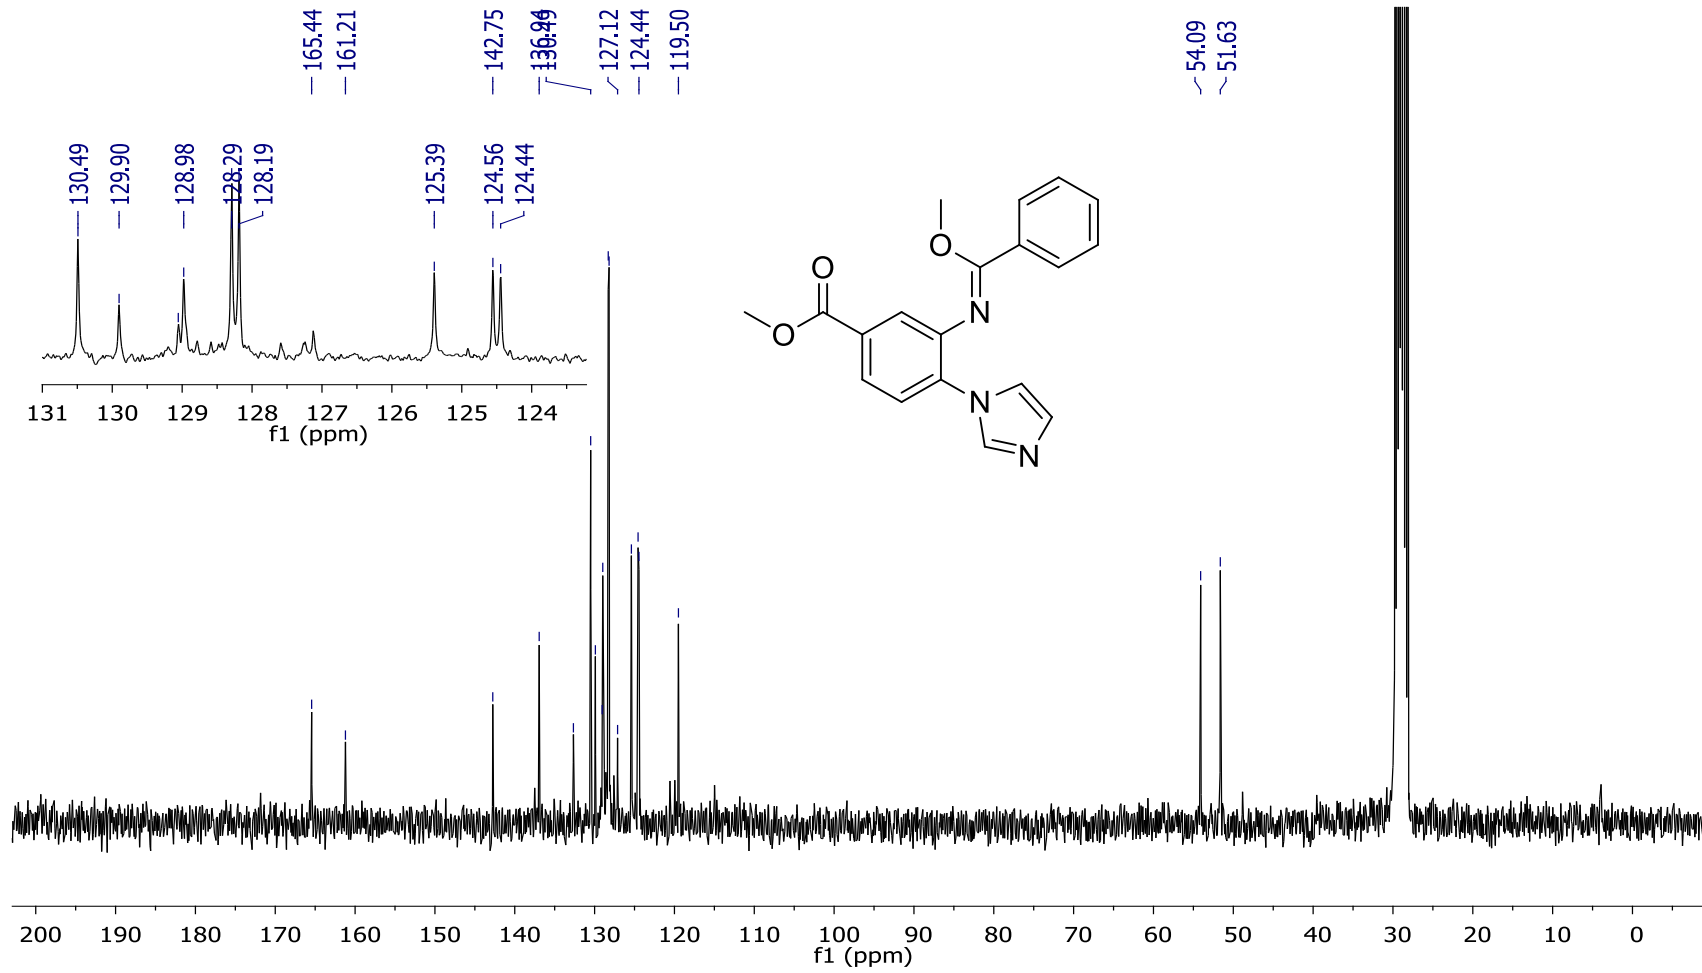

**<sup>13</sup>C NMR spectrum (101 MHz) of compound 13c in Acetone-d<sub>6</sub>**

ib-N6-025(3)

2013091712 17 (0.598) Cn (Cen,2, 80.00, Ht); Sm (Mn, 2x0.75); Sb (2,40.00 ); Cm (12:32-2:8x3.000)

Scan ES+  
5.30e7

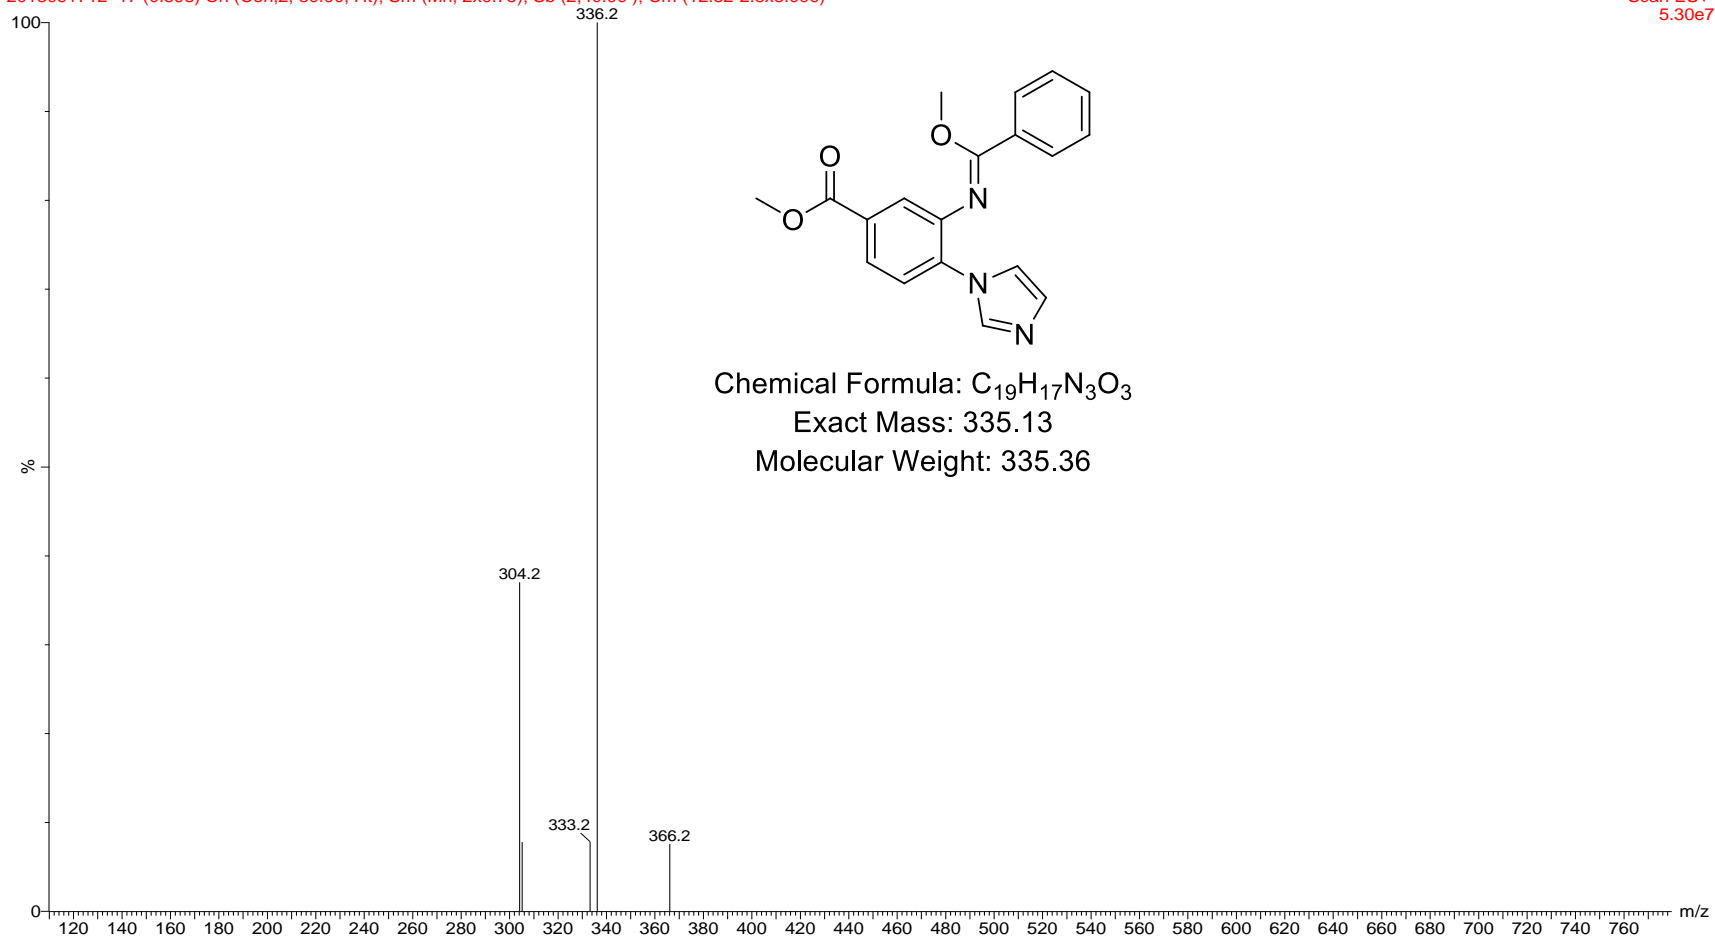

ESI-LRMS of compound 13c

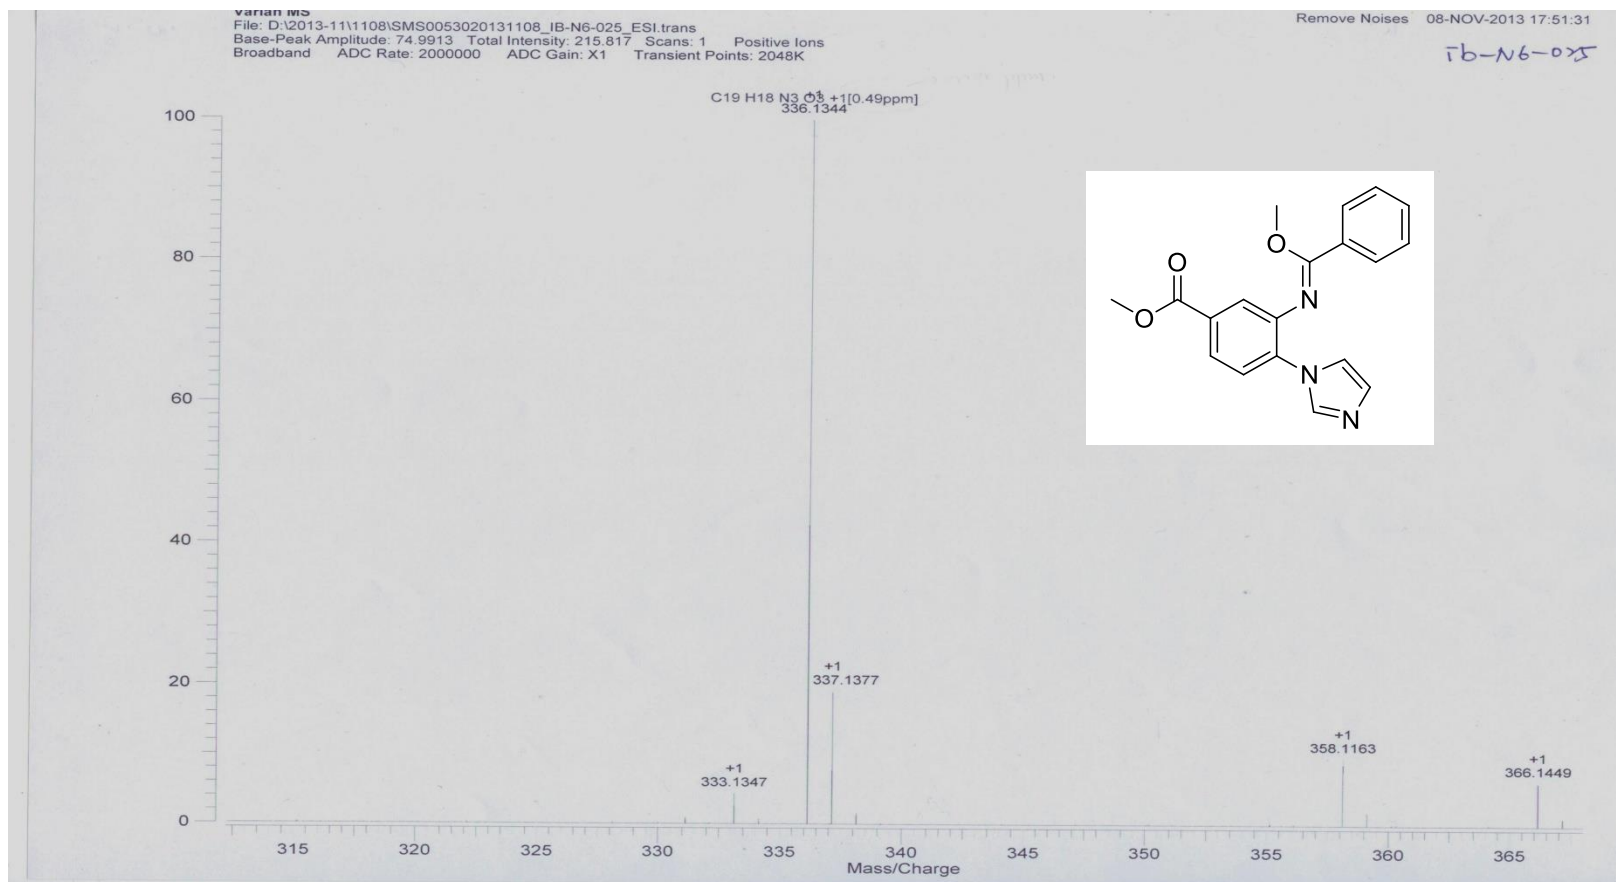

ESI-HRMS of compound **13c**

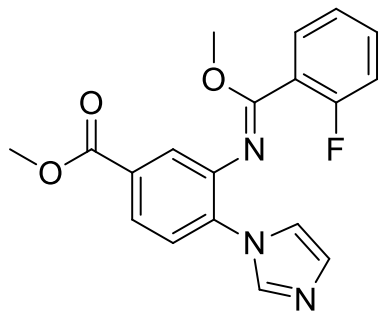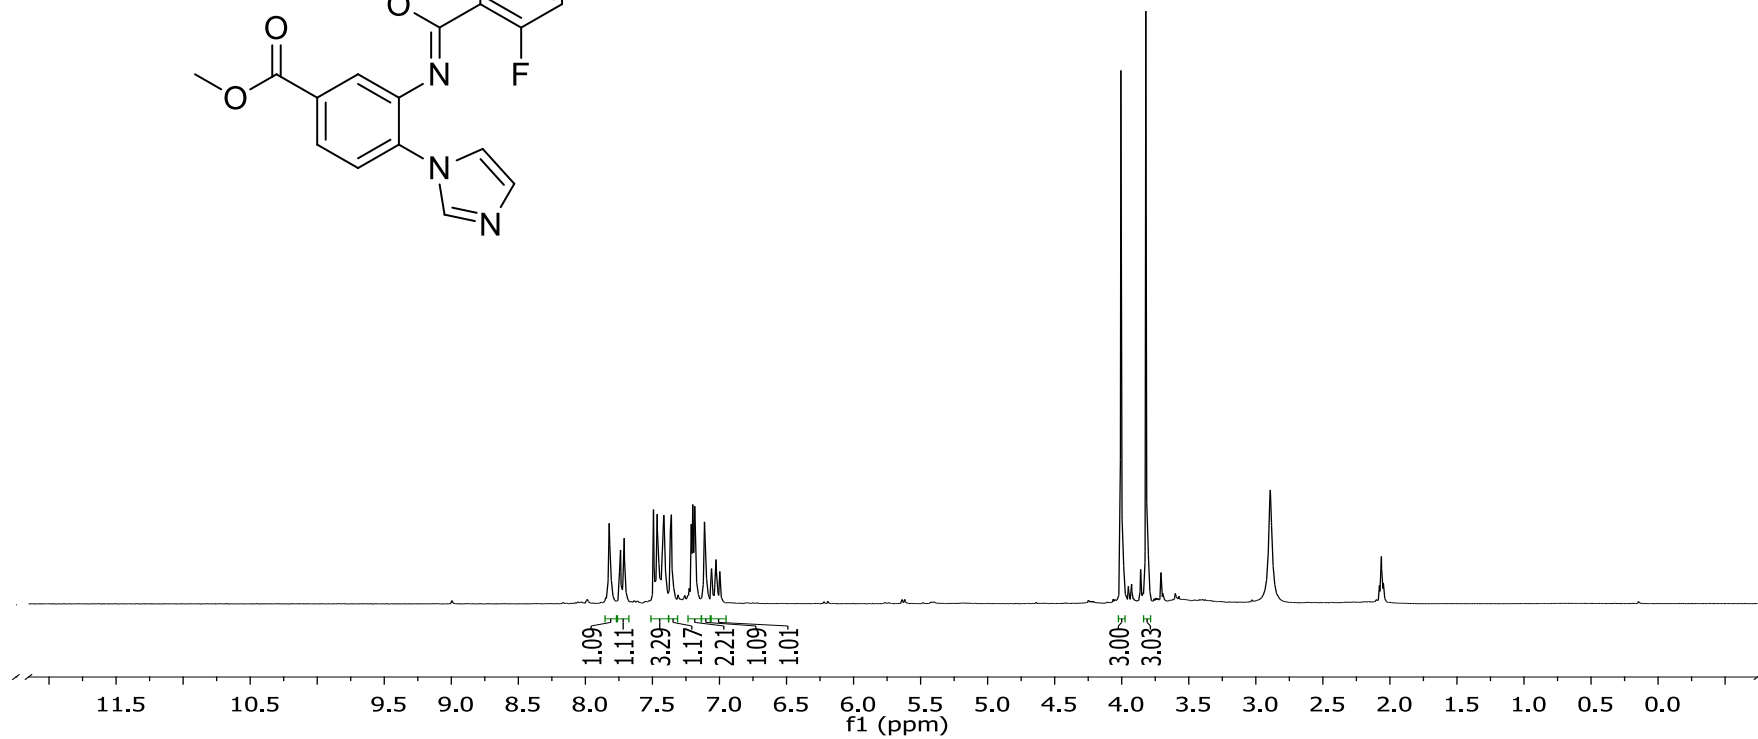

<sup>1</sup>H NMR spectrum (400 MHz) of compound **13d** in Acetone-d<sub>6</sub>

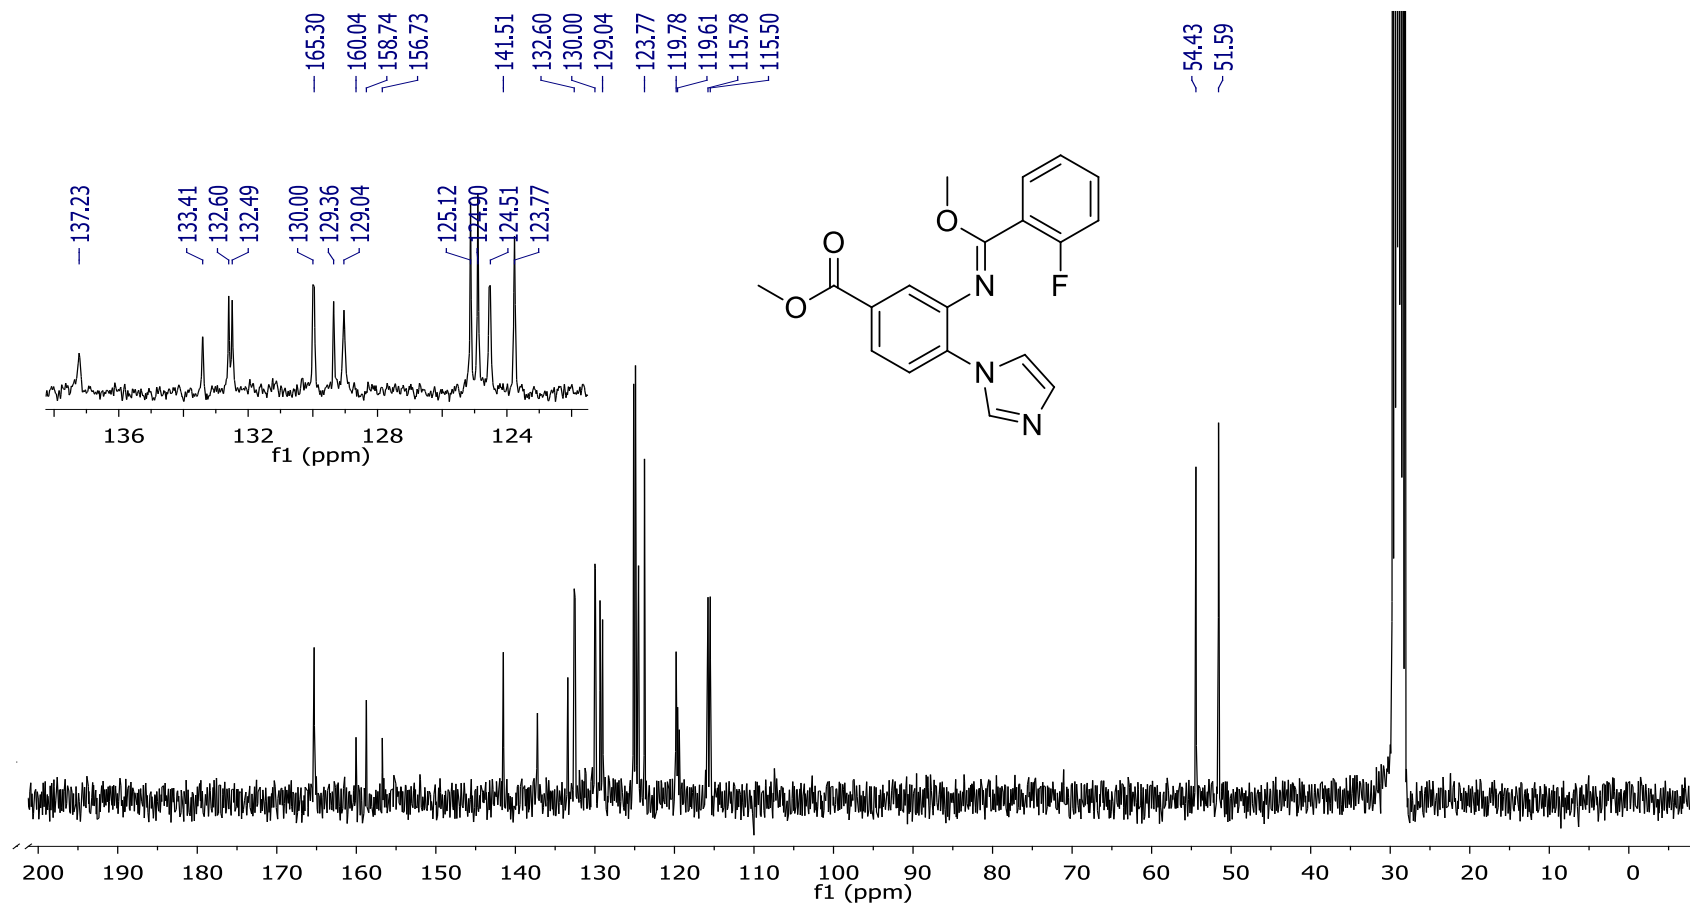

$^{13}\text{C}$  NMR spectrum (101 MHz) of compound **13d** in Acetone- $\text{d}_6$

ib-N5-077

20130719-26 60 (4.110) Cn (Cen,2, 80.00, Ht); Sm (Mn, 2x0.75); Sb (3,50.00); Cm (56:66-1:40x3.000)

Scan ES+  
7.81e7

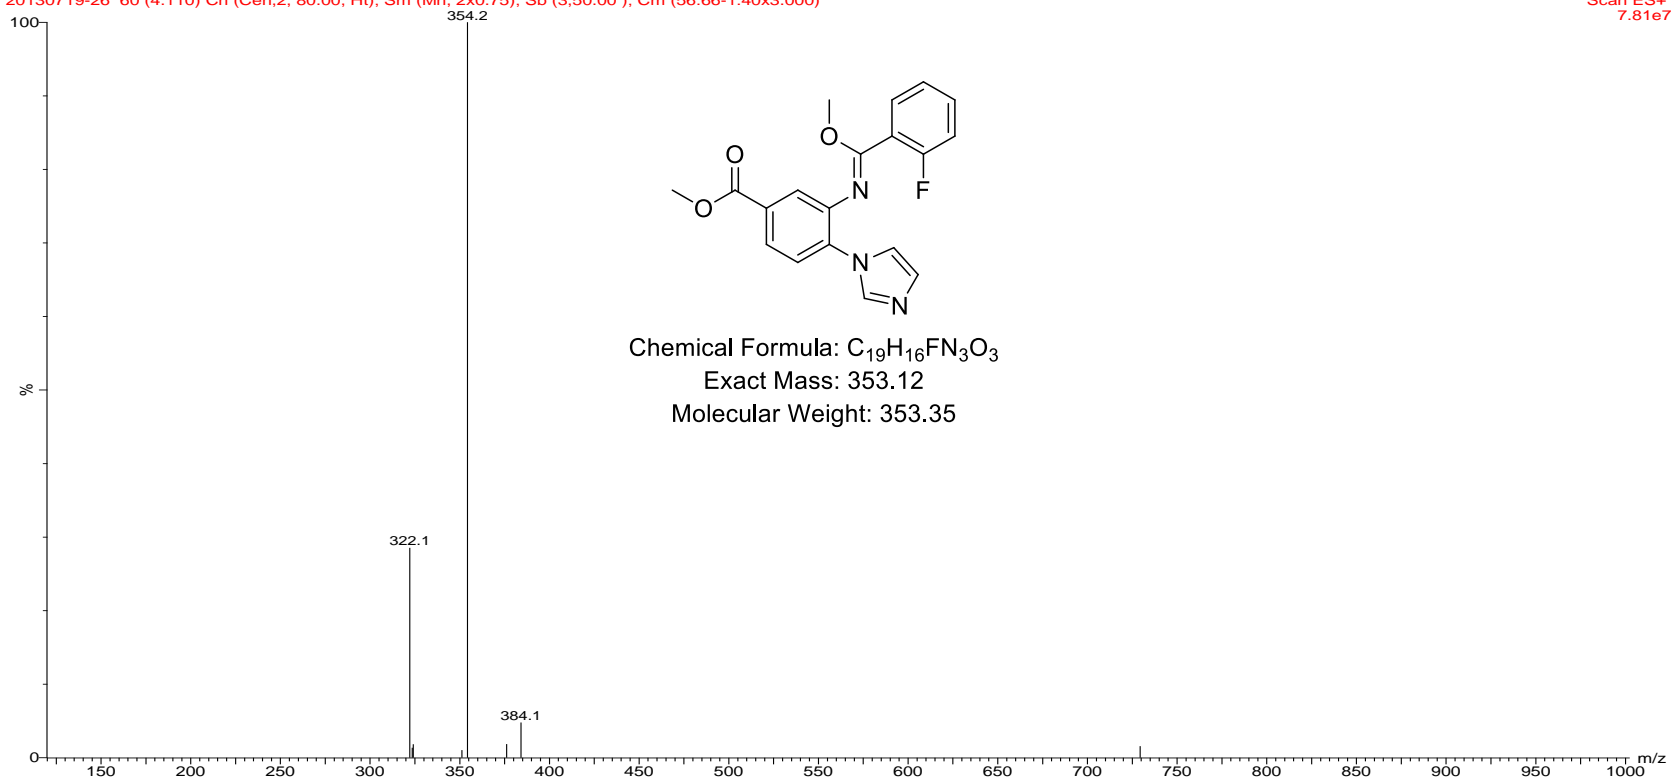

ESI-LRMS of compound **13d**



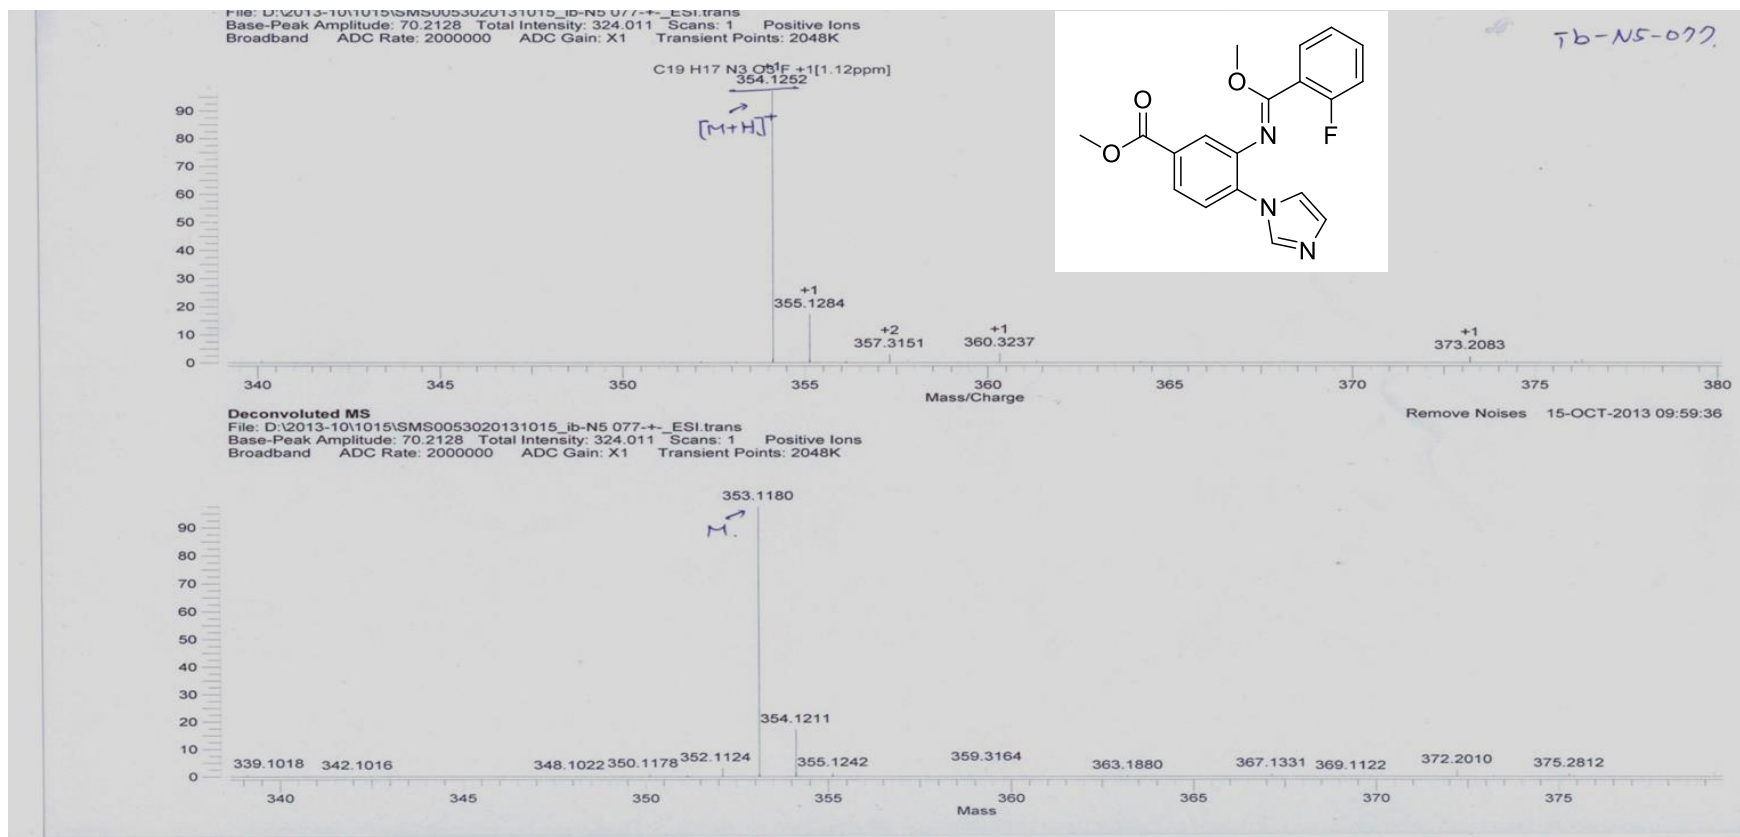

ESI-HRMS of compound **13d**

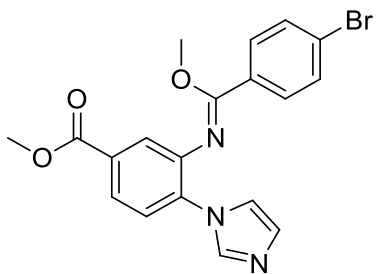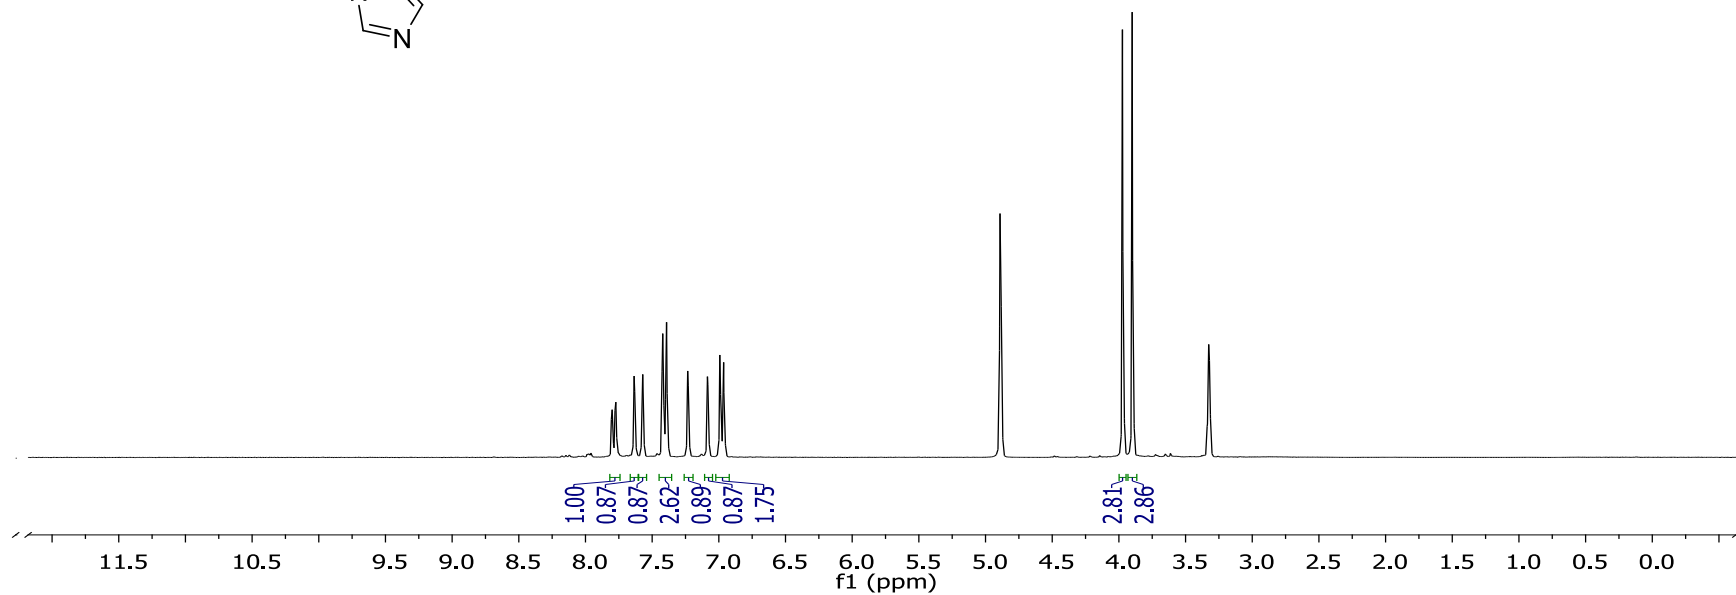

$^1\text{H}$  NMR spectrum (400 MHz) of compound **13e** in Acetone- $\text{d}_6$

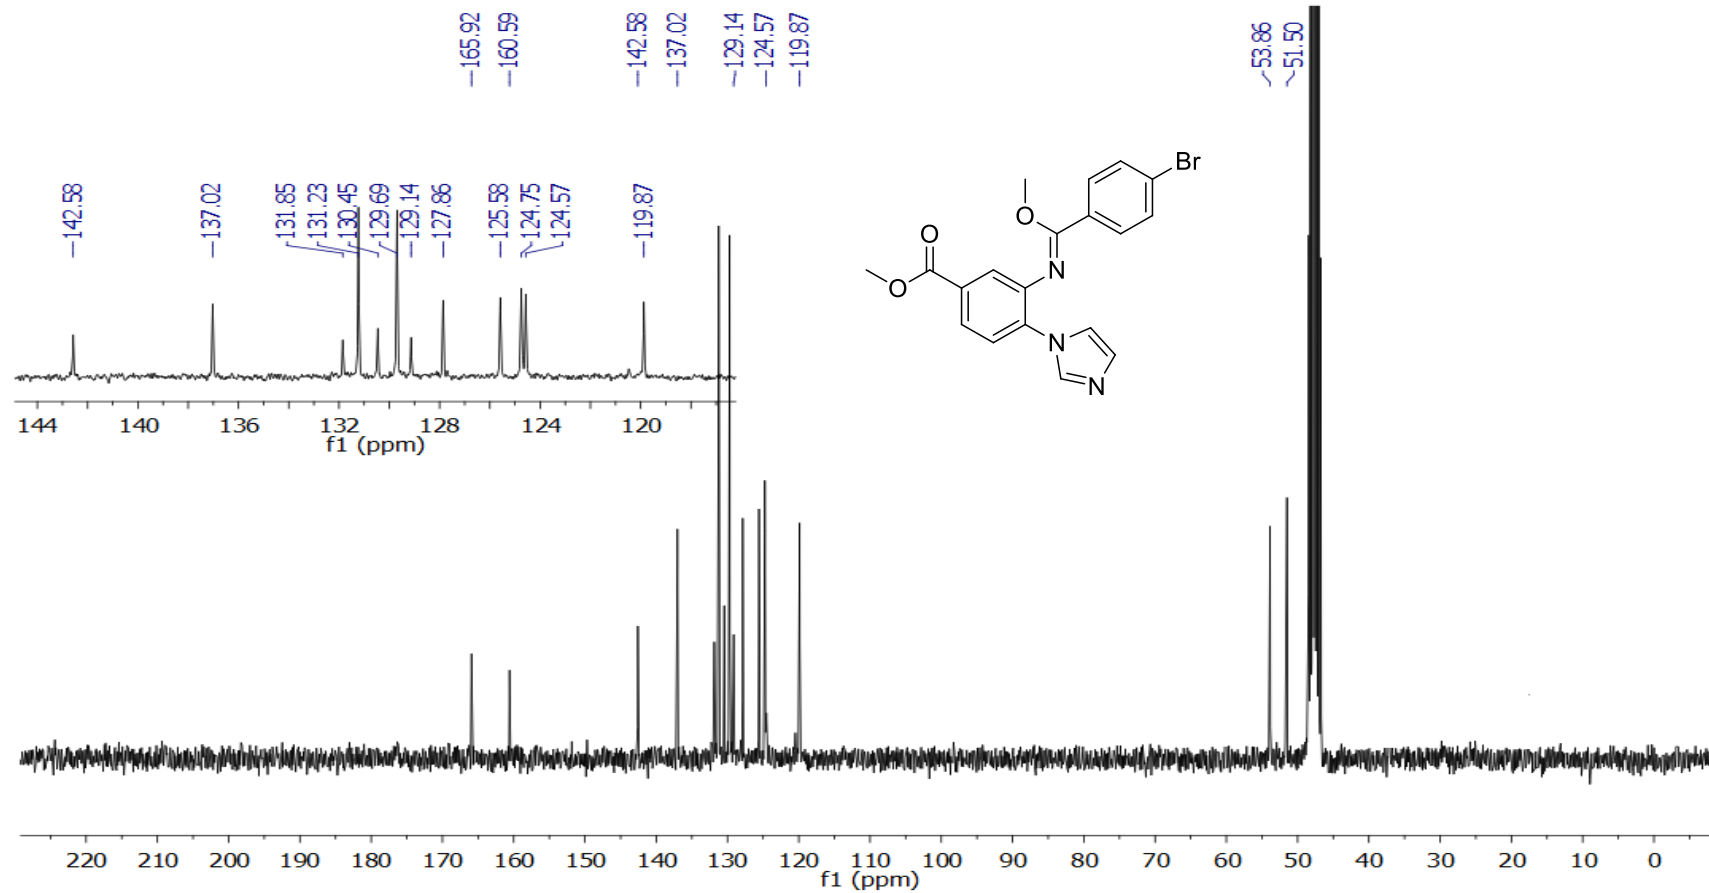

$^{13}\text{C}$  NMR spectrum (101 MHz) of compound **13e** in Acetone- $\text{d}_6$

ib-N6-041

2013100407 38 (1.336) Cn (Cen,2, 80.00, Ht); Sm (Mn, 2x0.75); Sb (3,40.00); Cm (29:43-1:18x3.000)

Scan ES+  
1.31e8

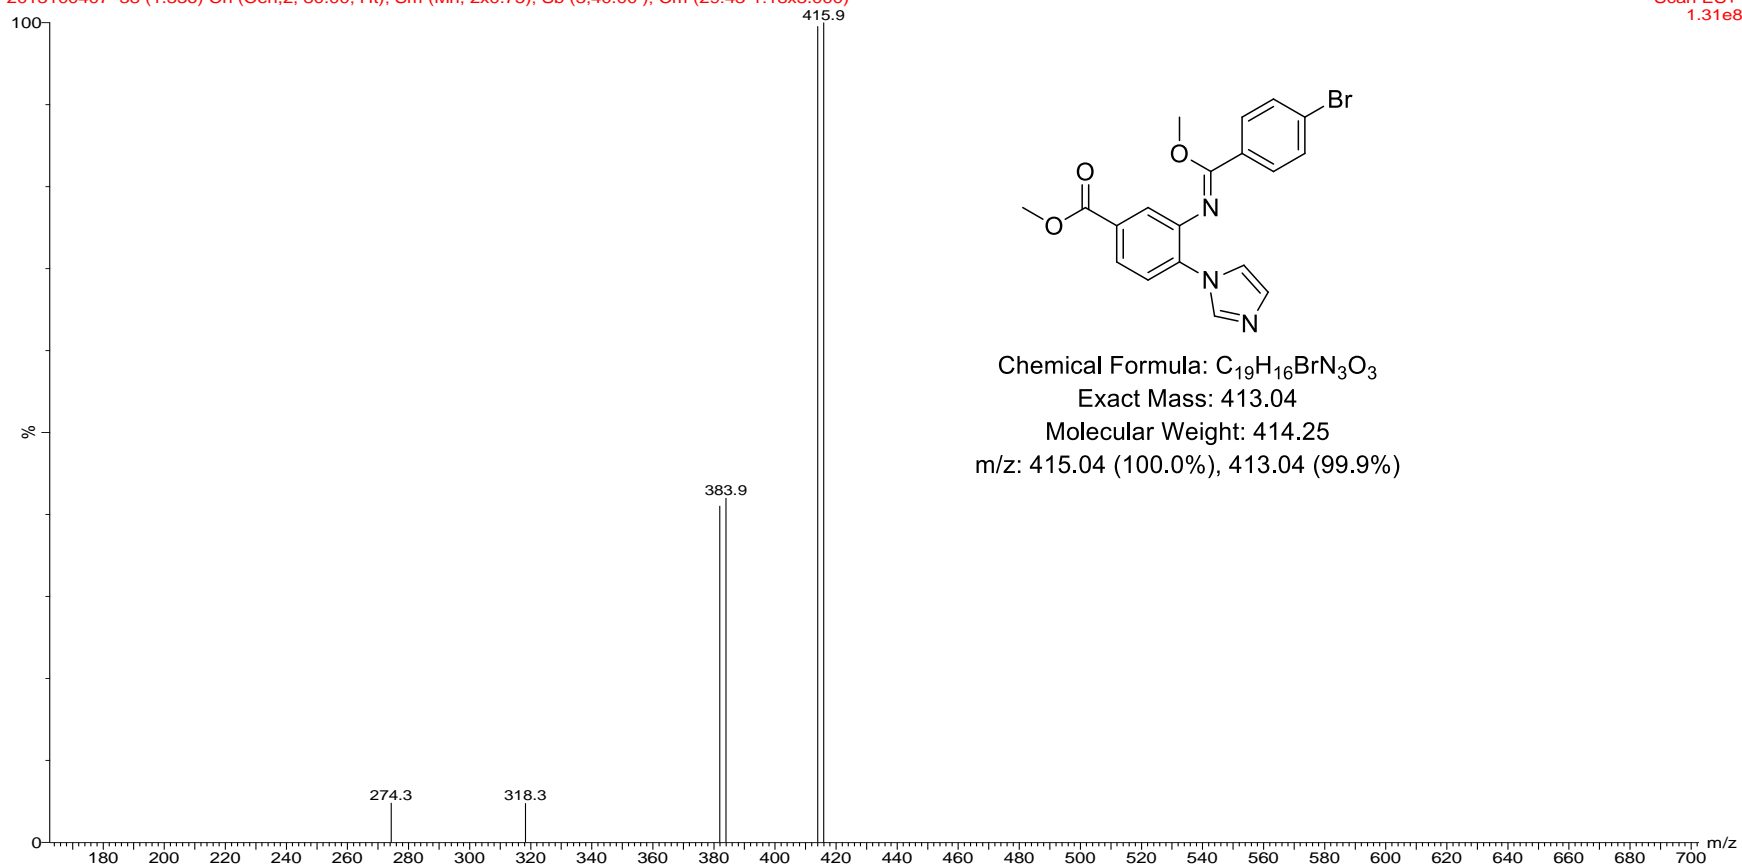

ESI-LRMS of compound **13e**

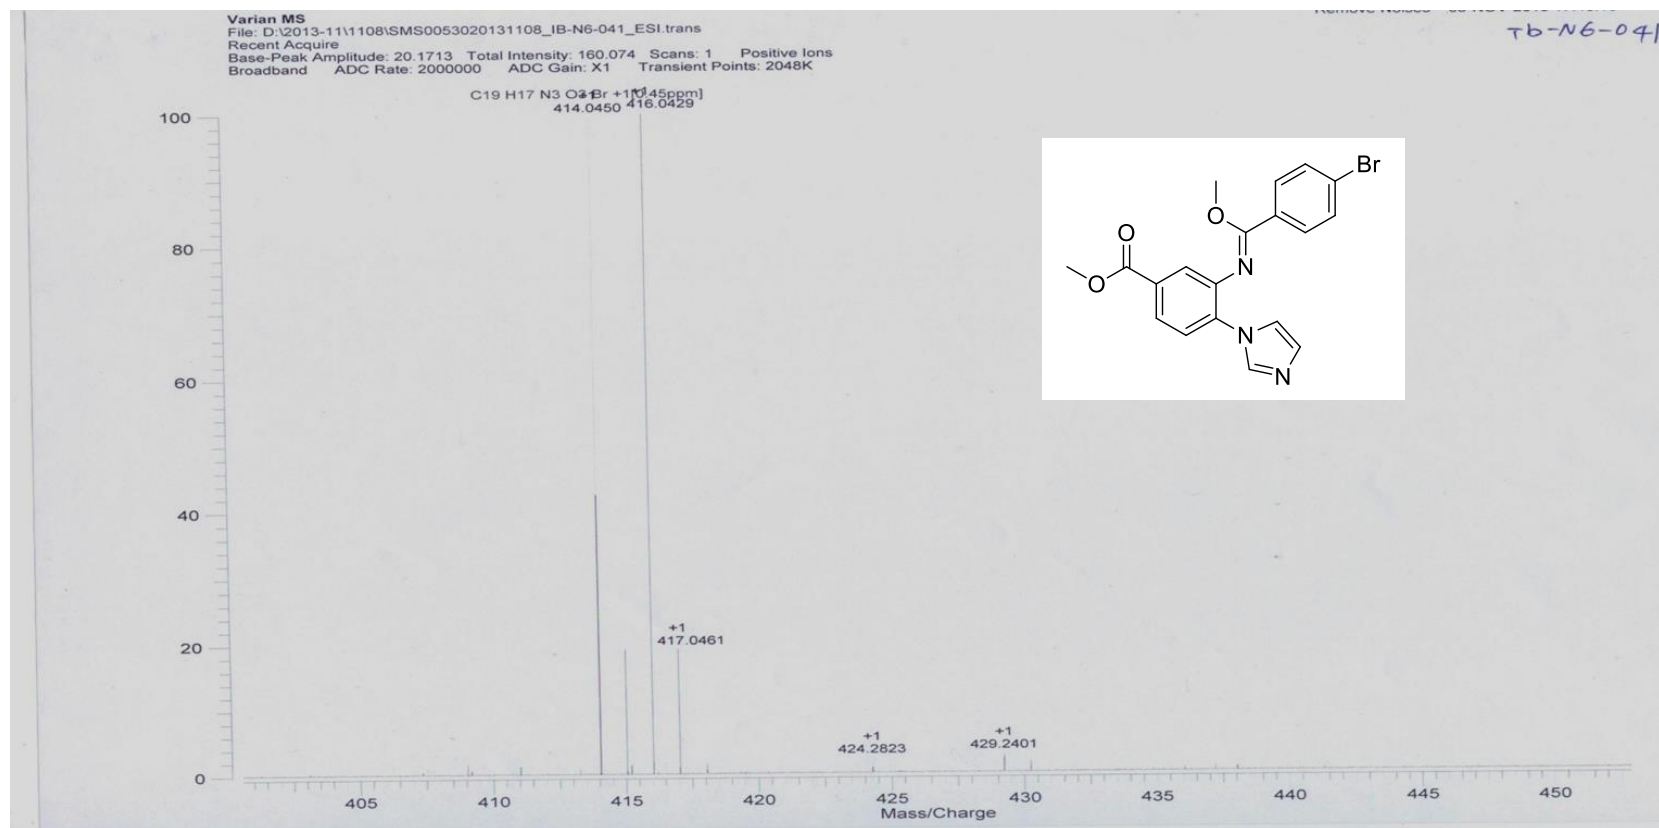

ESI-HRMS of compound **13e**

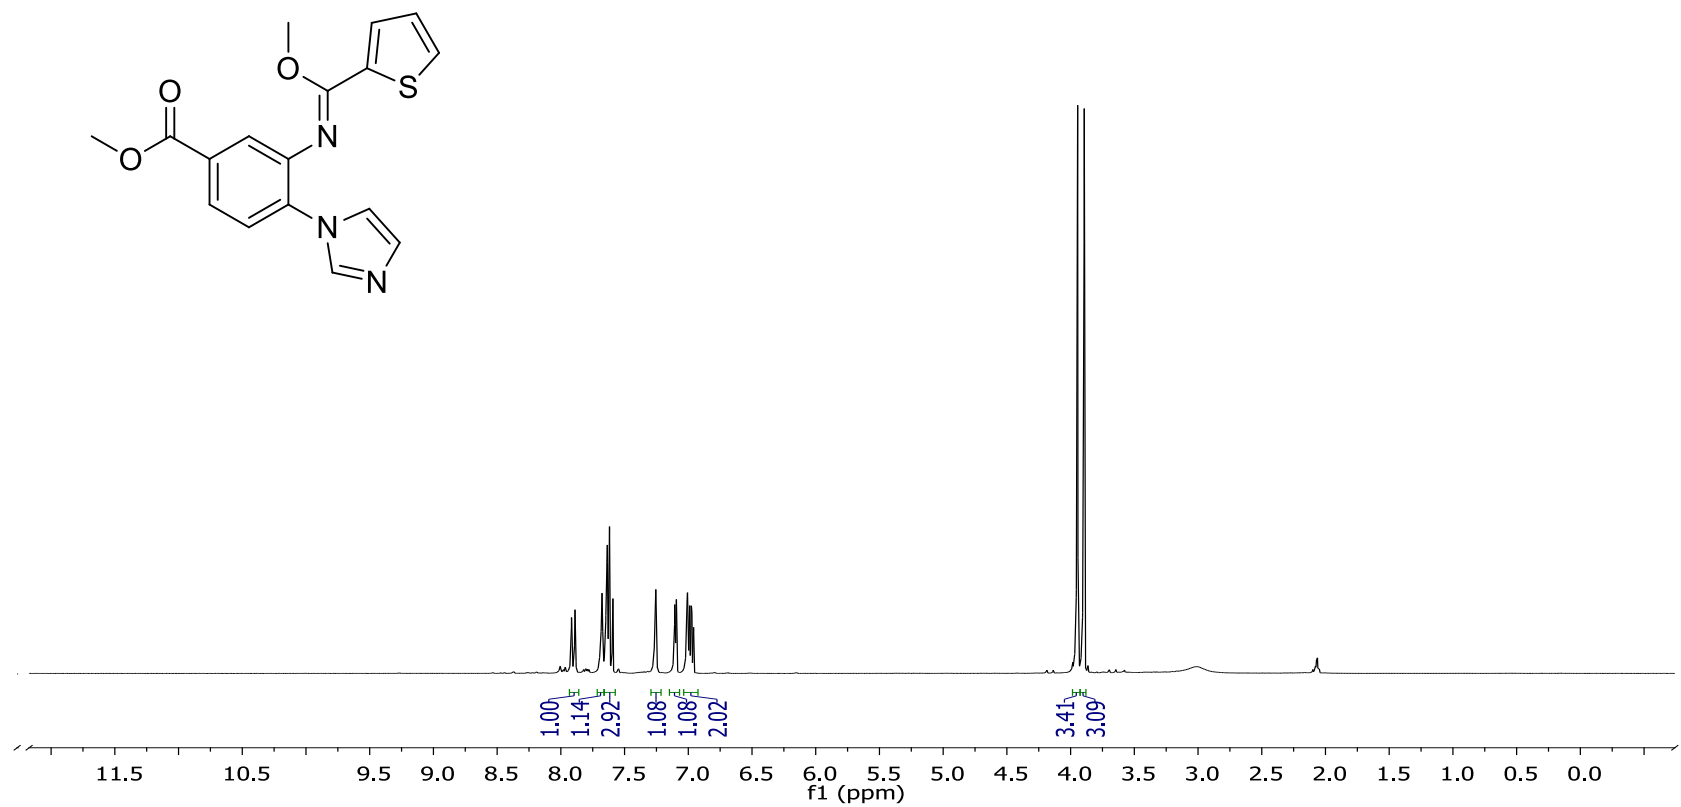

<sup>1</sup>H NMR spectrum (400 MHz) of compound **13f** in Acetone-d<sub>6</sub>

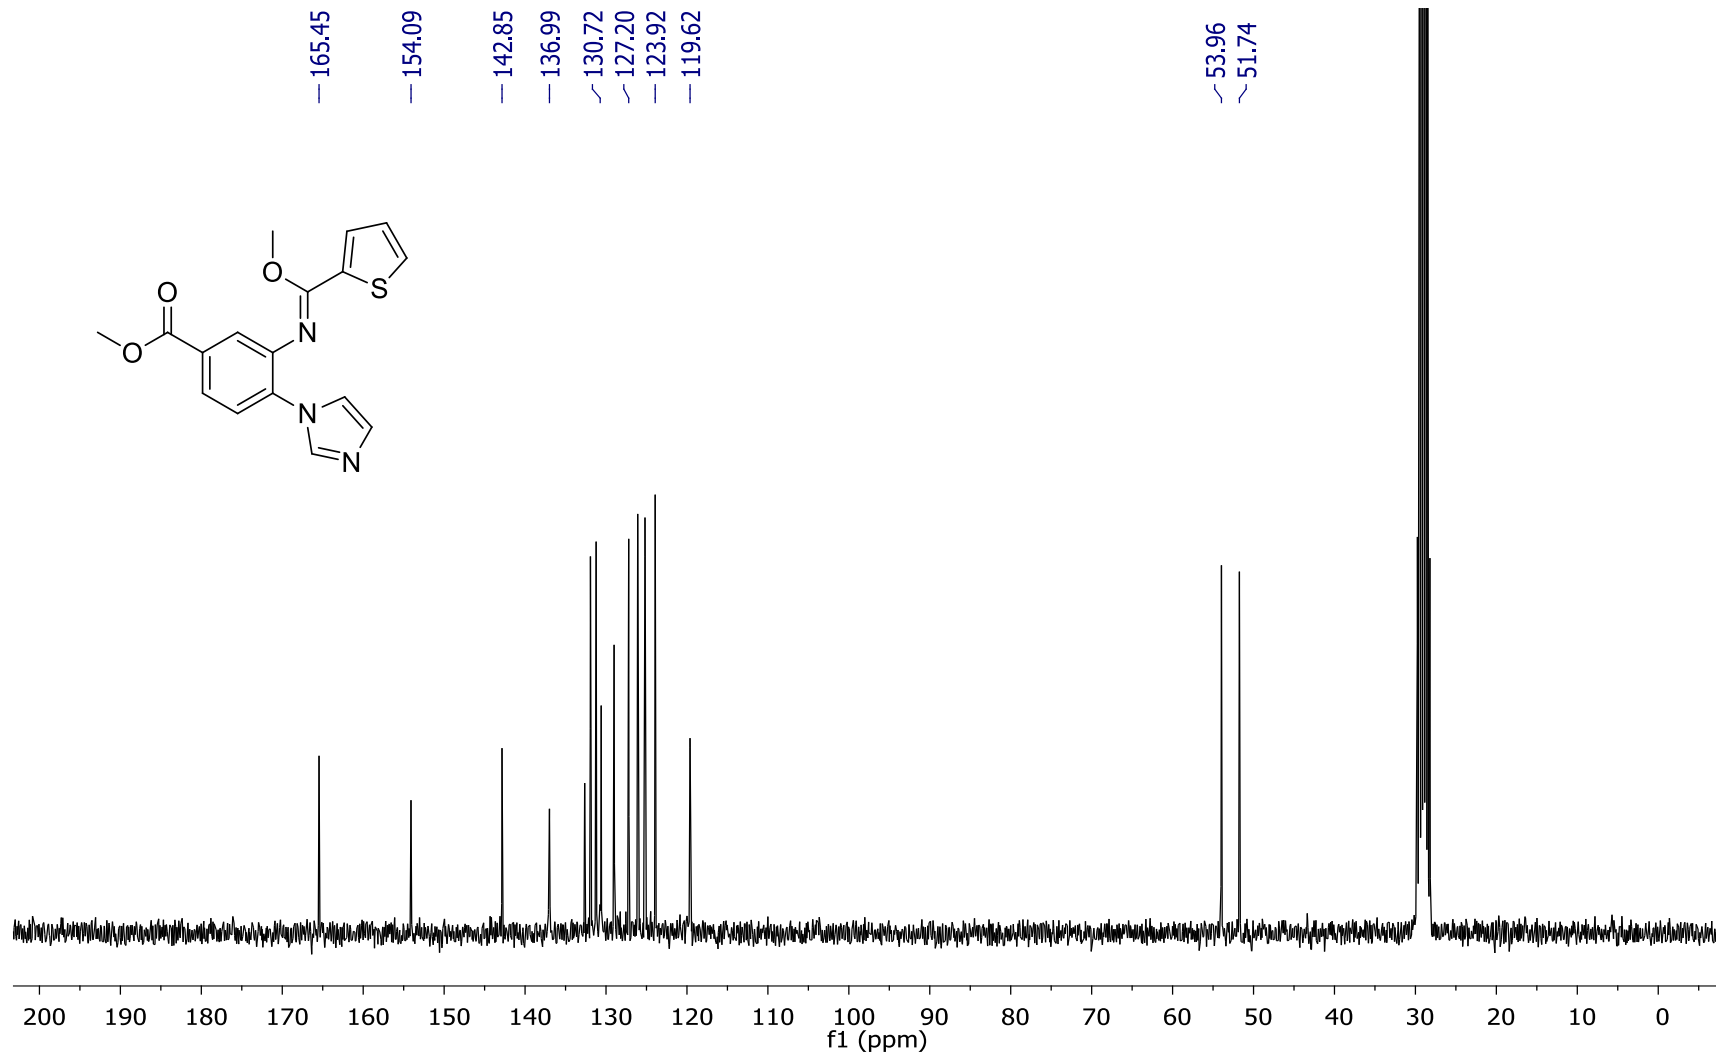

$^{13}\text{C}$  NMR spectrum (101 MHz) of compound **13f** in Acetone- $\text{d}_6$

ib-N6-007

20130823-12 28 (1.918) Cn (Cen,2, 80.00, Ht); Sm (Mn, 2x0.75); Sb (2.50.00 ); Cm (27:39-1:21x3.000)

Scan ES+  
1.23e8

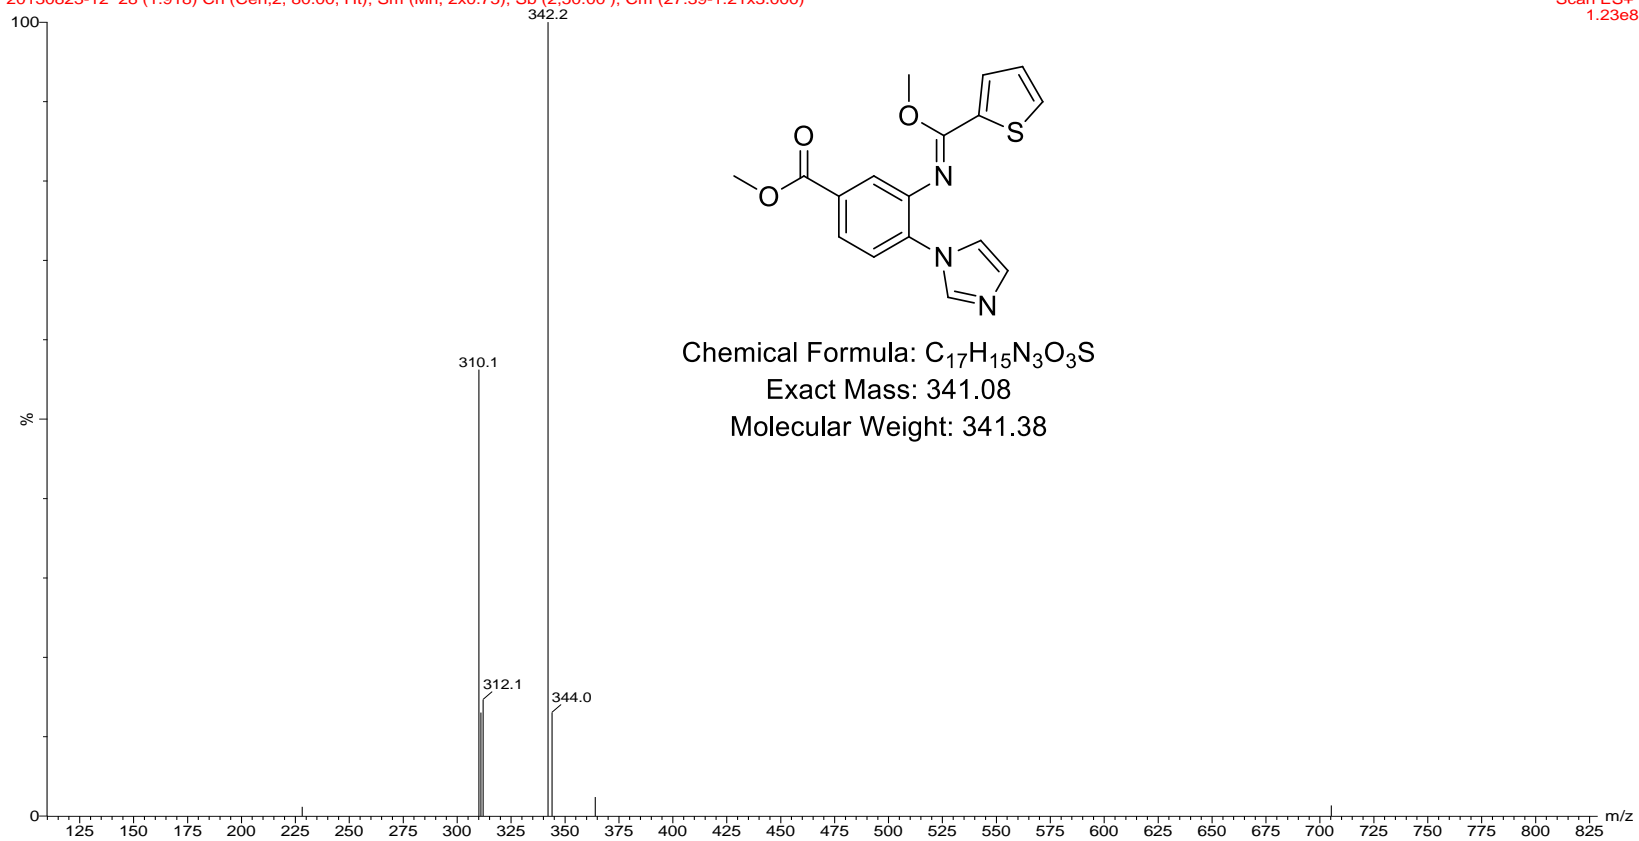

ESI-LRMS of compound **13f**



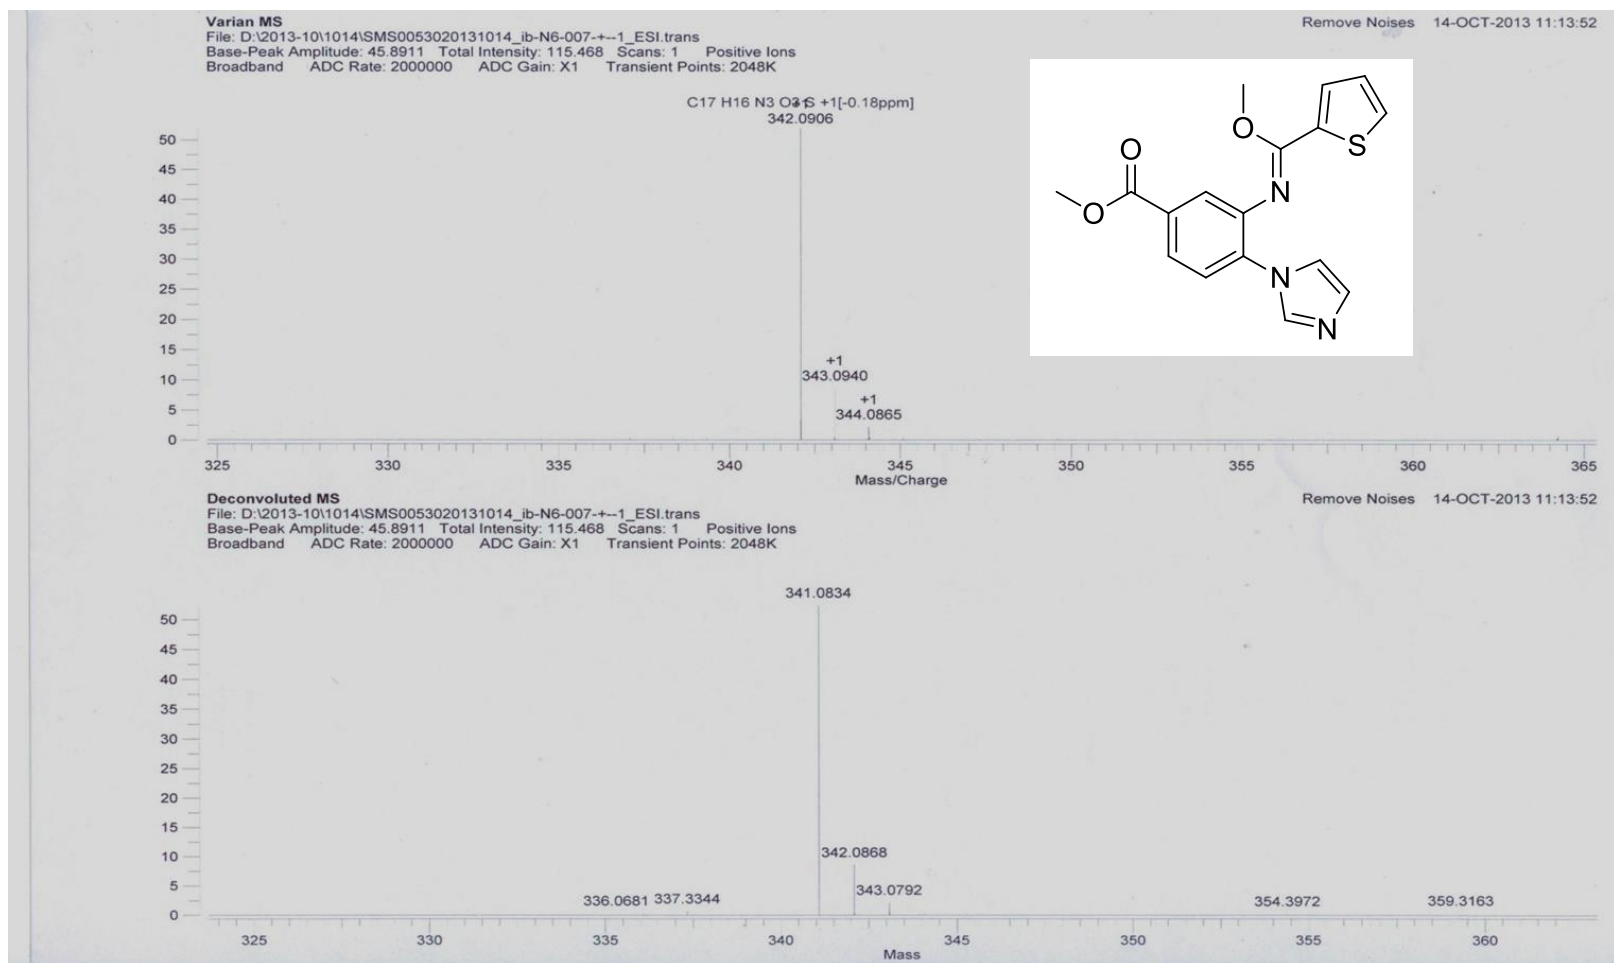

ESI-HRMS of compound **13f**

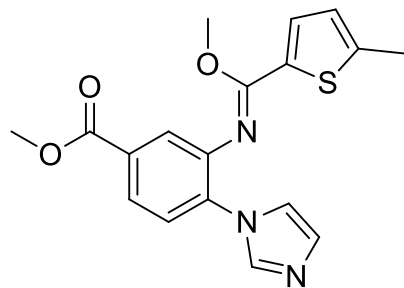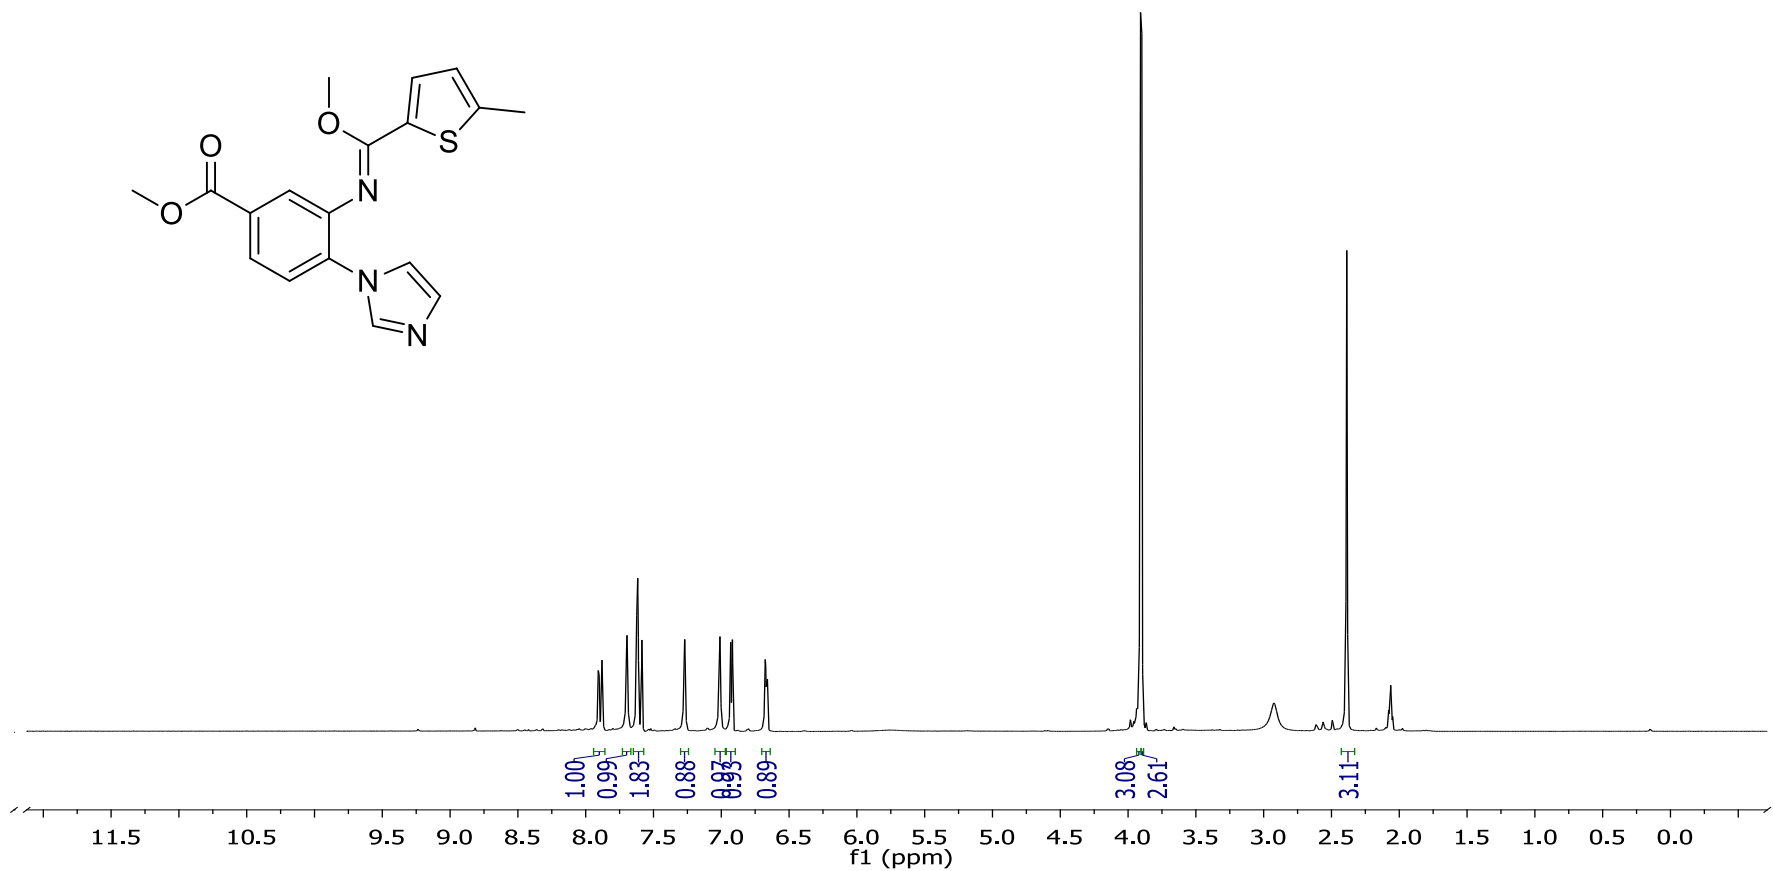

$^1\text{H}$  NMR spectrum (400 MHz) of compound **13g** in  $\text{Acetone-d}_6$

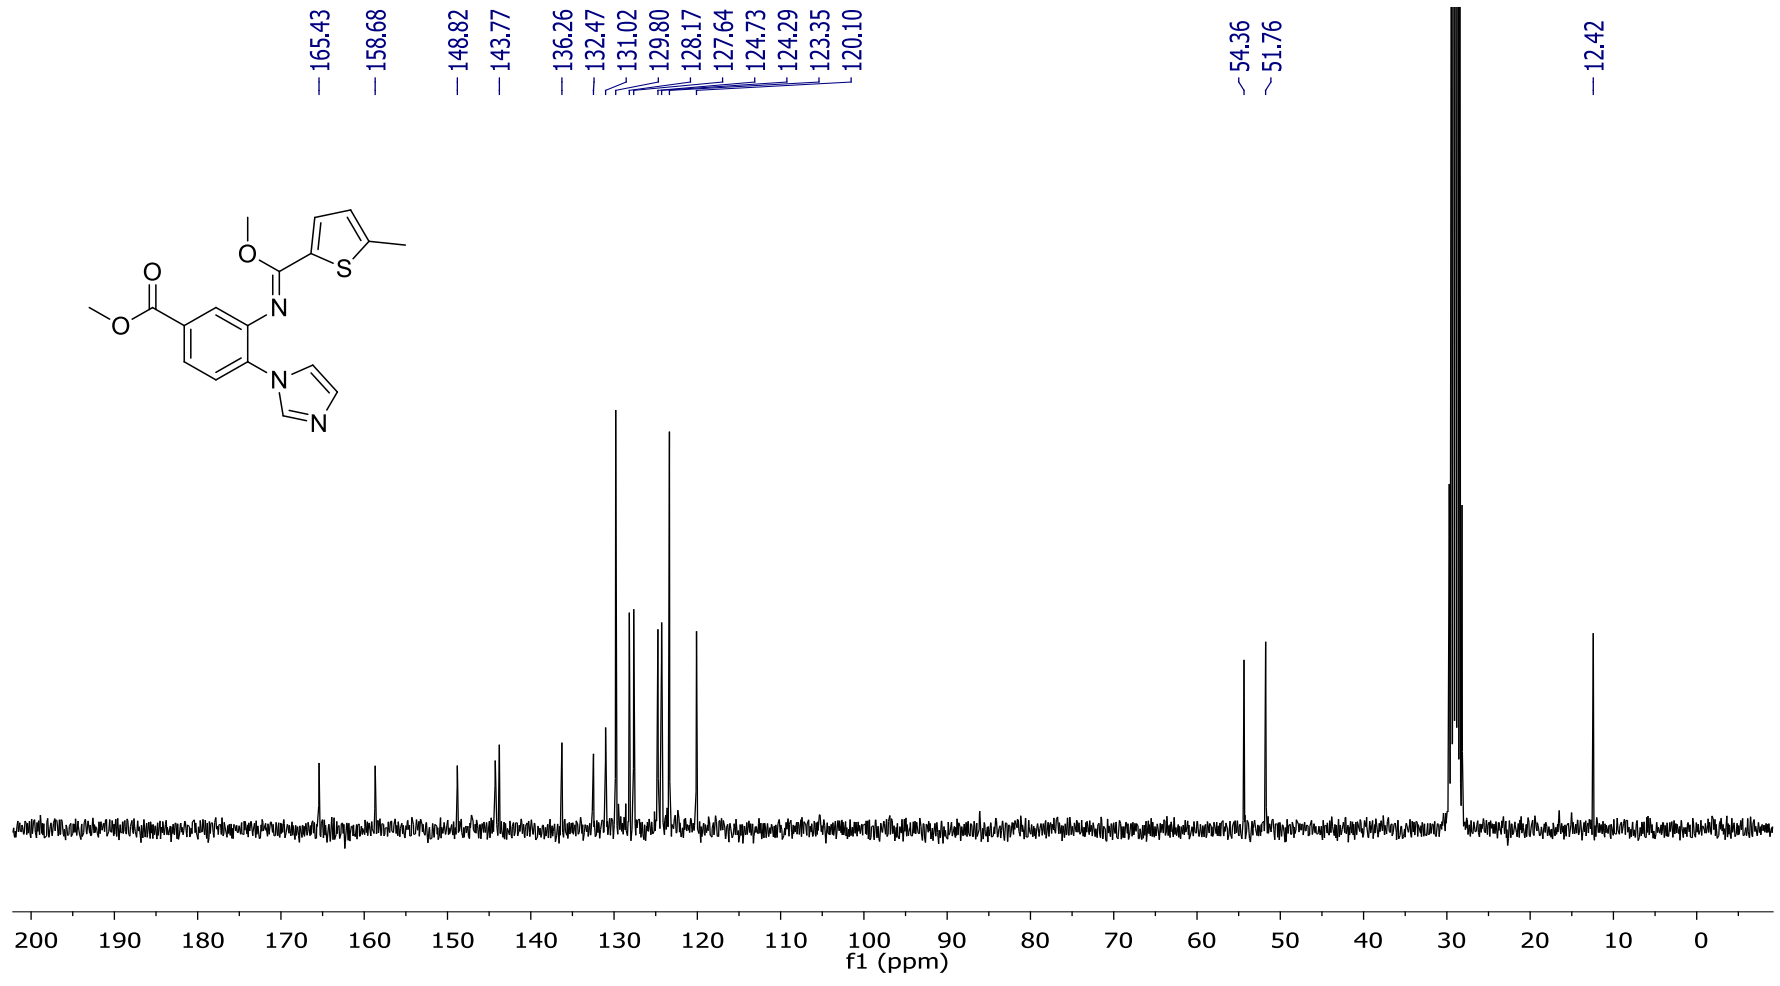

$^{13}\text{C}$  NMR spectrum (101 MHz) of compound **13g** in Acetone- $\text{d}_6$

ib-N6-039

20131001020 59 (2.075) Cn (Cen,2, 80.00, Ht); Sm (Mn, 2x0.75); Sb (3,40.00 ); Cm (57:71-41:54x3.000)

Scan ES+  
9.21e7

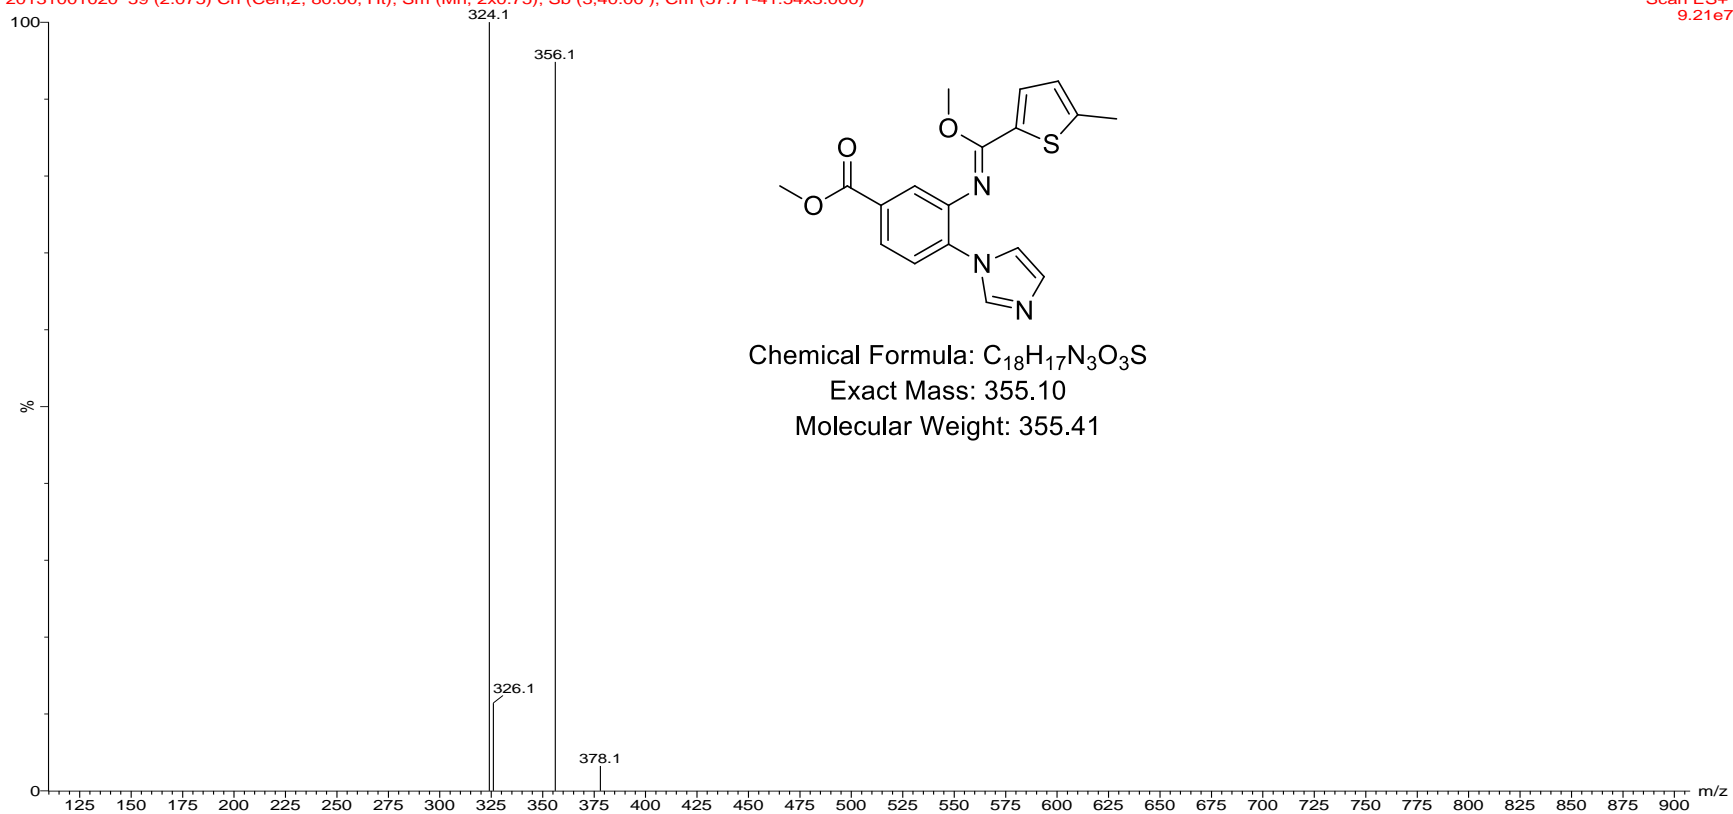

ESI-LRMS of compound 13g

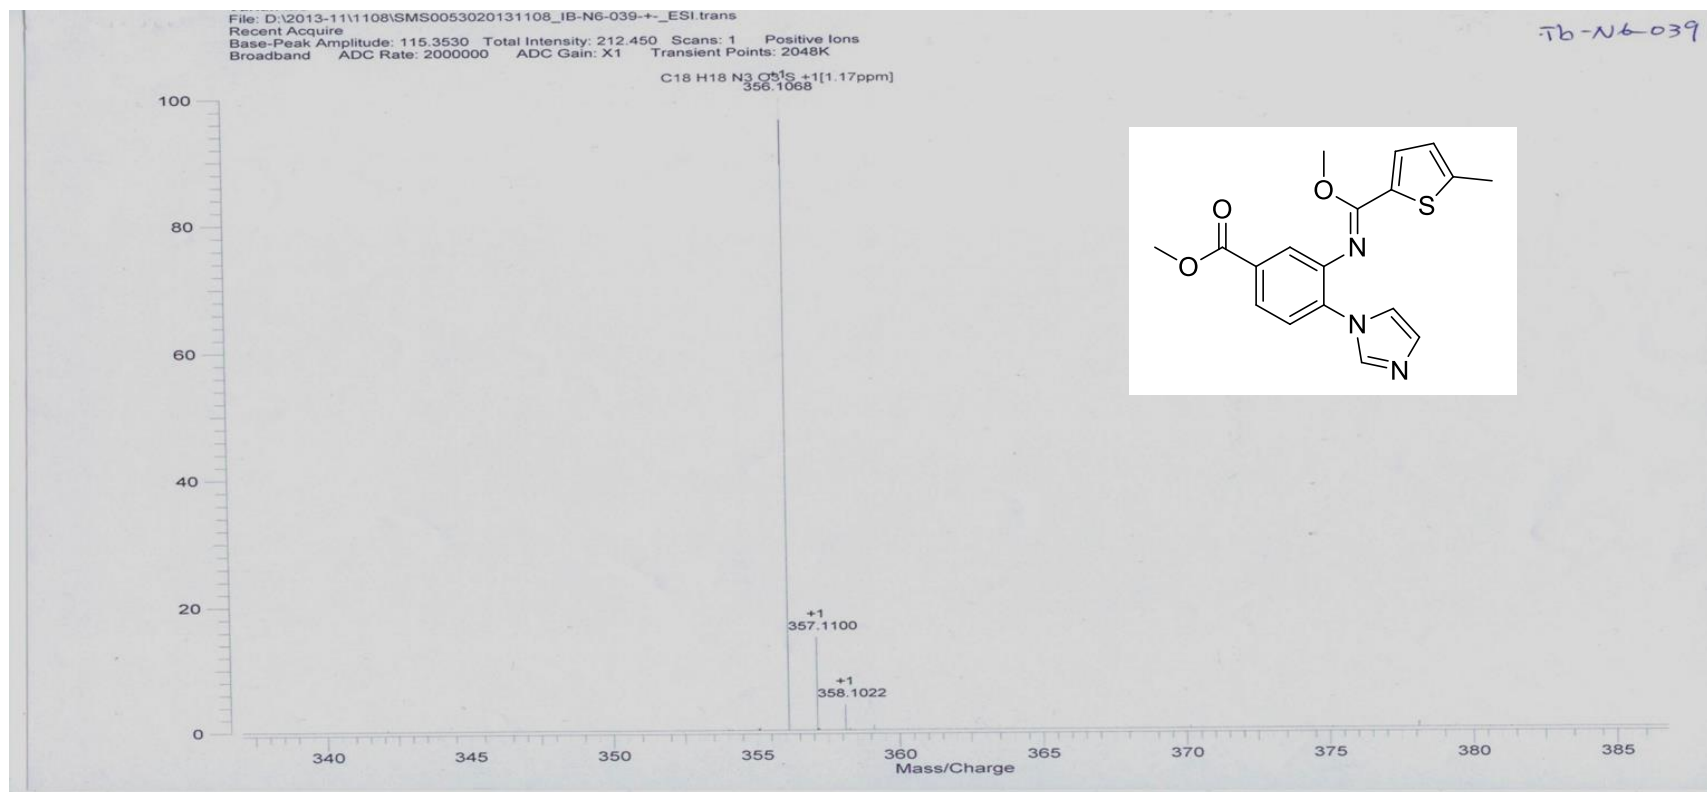

ESI-HRMS of compound **13g**

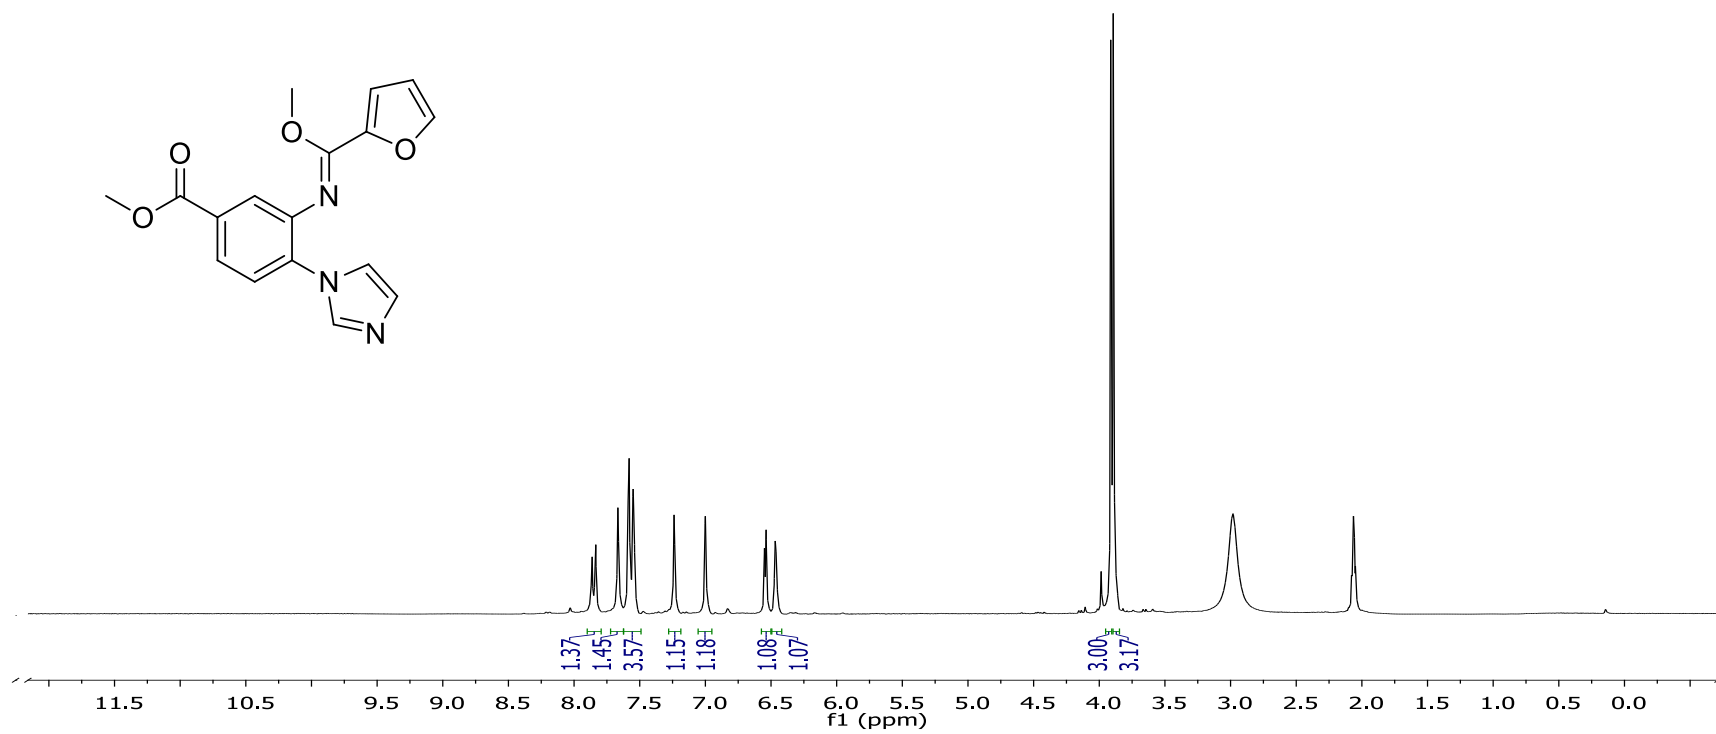

<sup>1</sup>H NMR spectrum (400 MHz) of compound **13h** in Acetone-d<sub>6</sub>

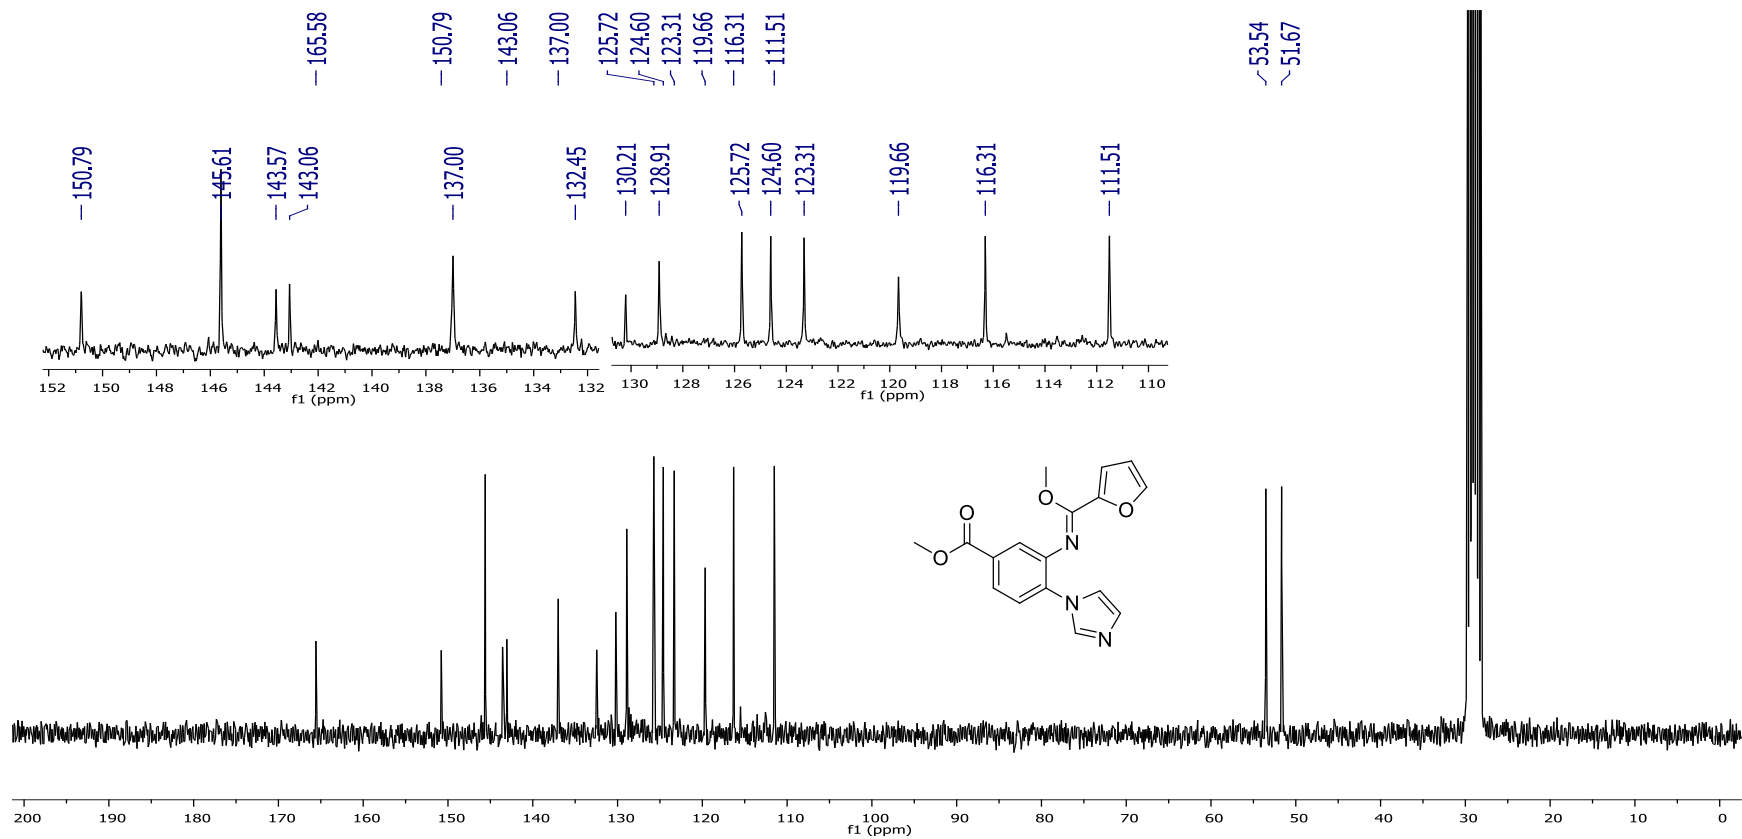

<sup>13</sup>C NMR spectrum (101 MHz) of compound **13h** in Acetone-d<sub>6</sub>

ib-N6-005

2013090301 91 (6.233) Cn (Cen,2, 80.00, Ht); Sm (Mn, 2x0.75); Sb (3,50.00 ); Cm (91:100-29:46x3.000)

Scan ES+  
1.33e8

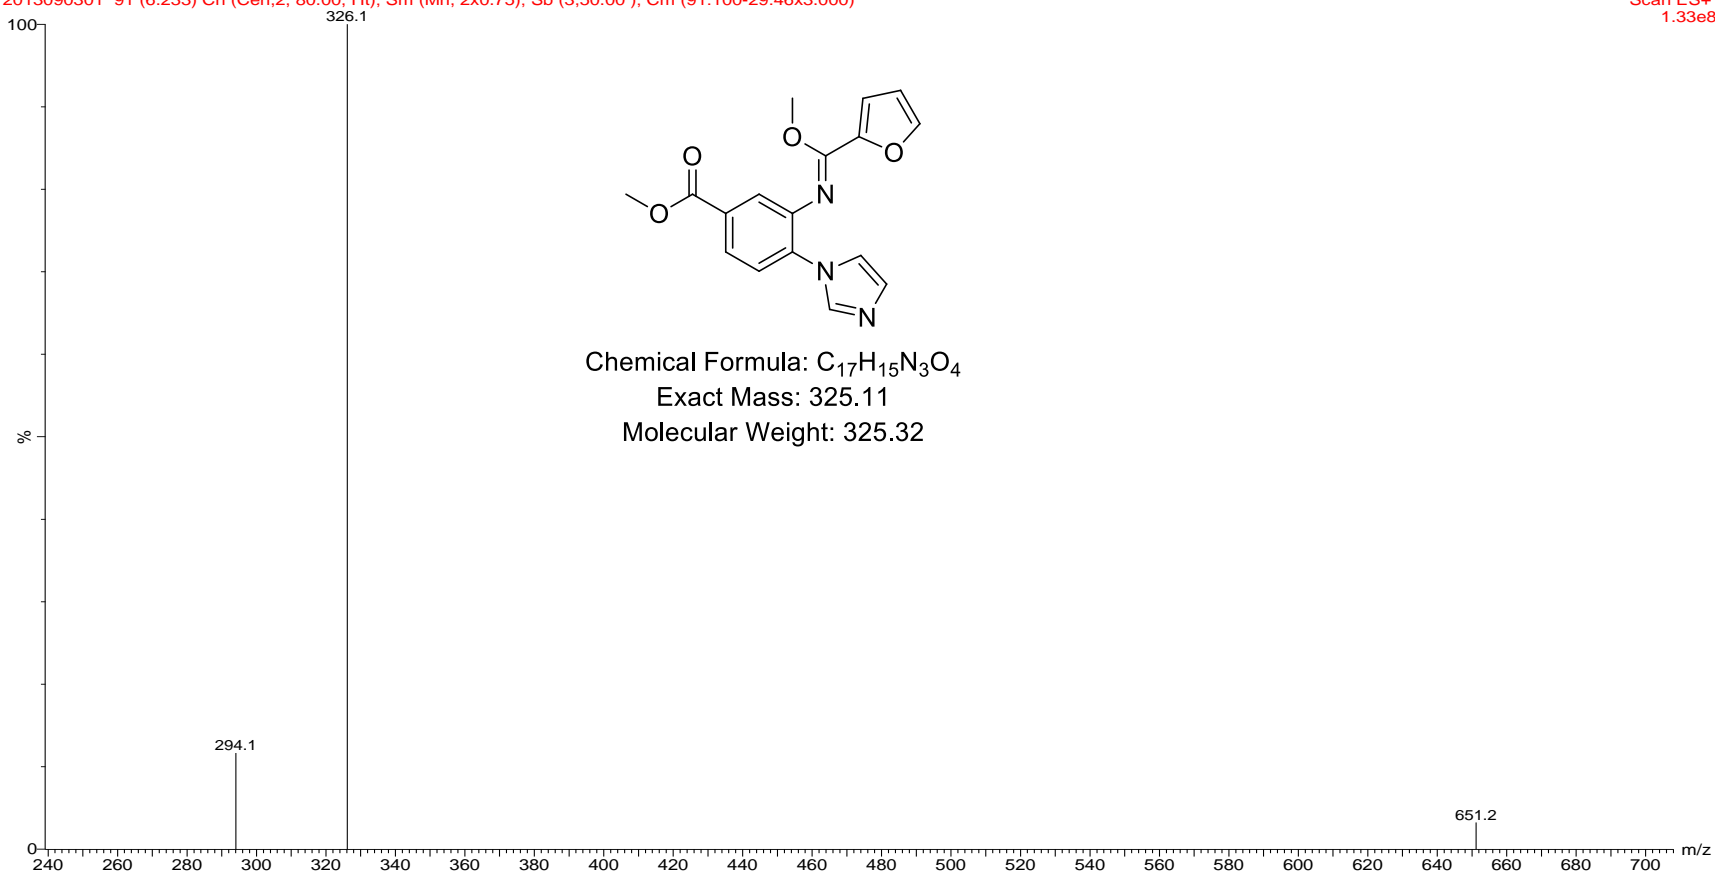

ESI-LRMS of compound **13h**



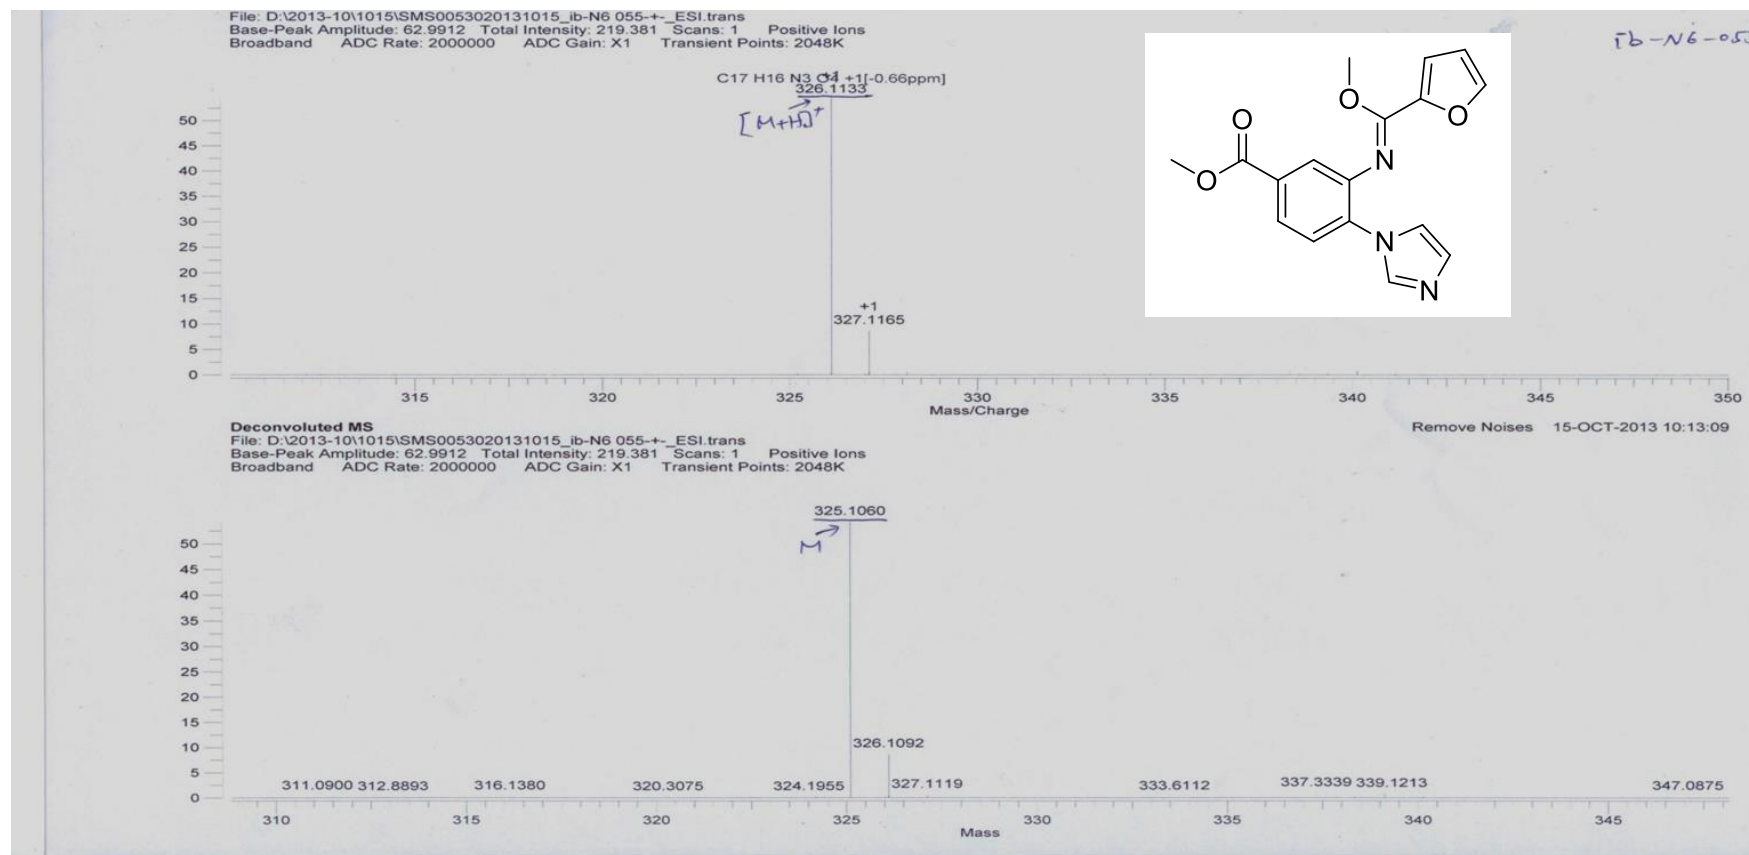

ESI-HRMS of compound **13h**

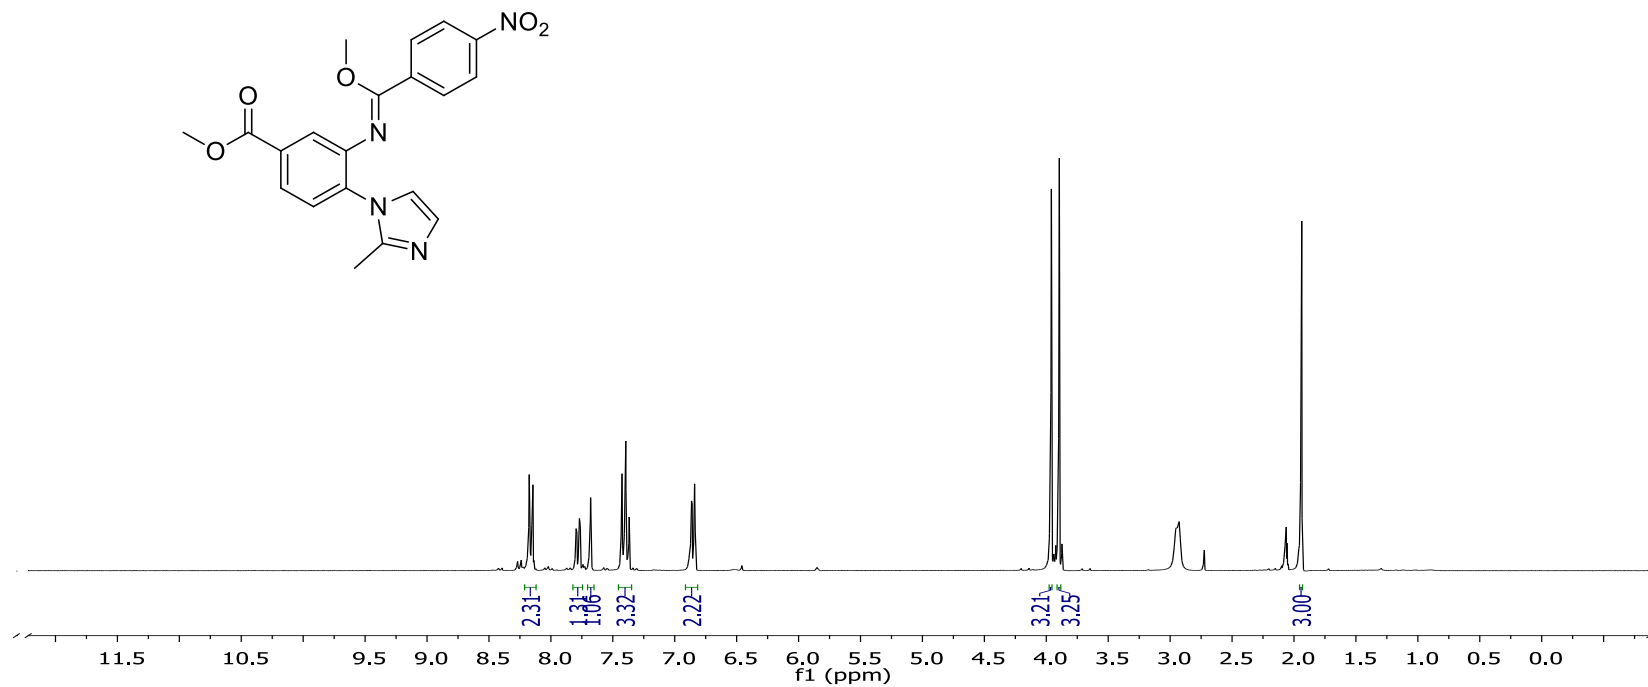

$^1\text{H}$  NMR spectrum (400 MHz) of compound **13i** in Acetone- $\text{d}_6$

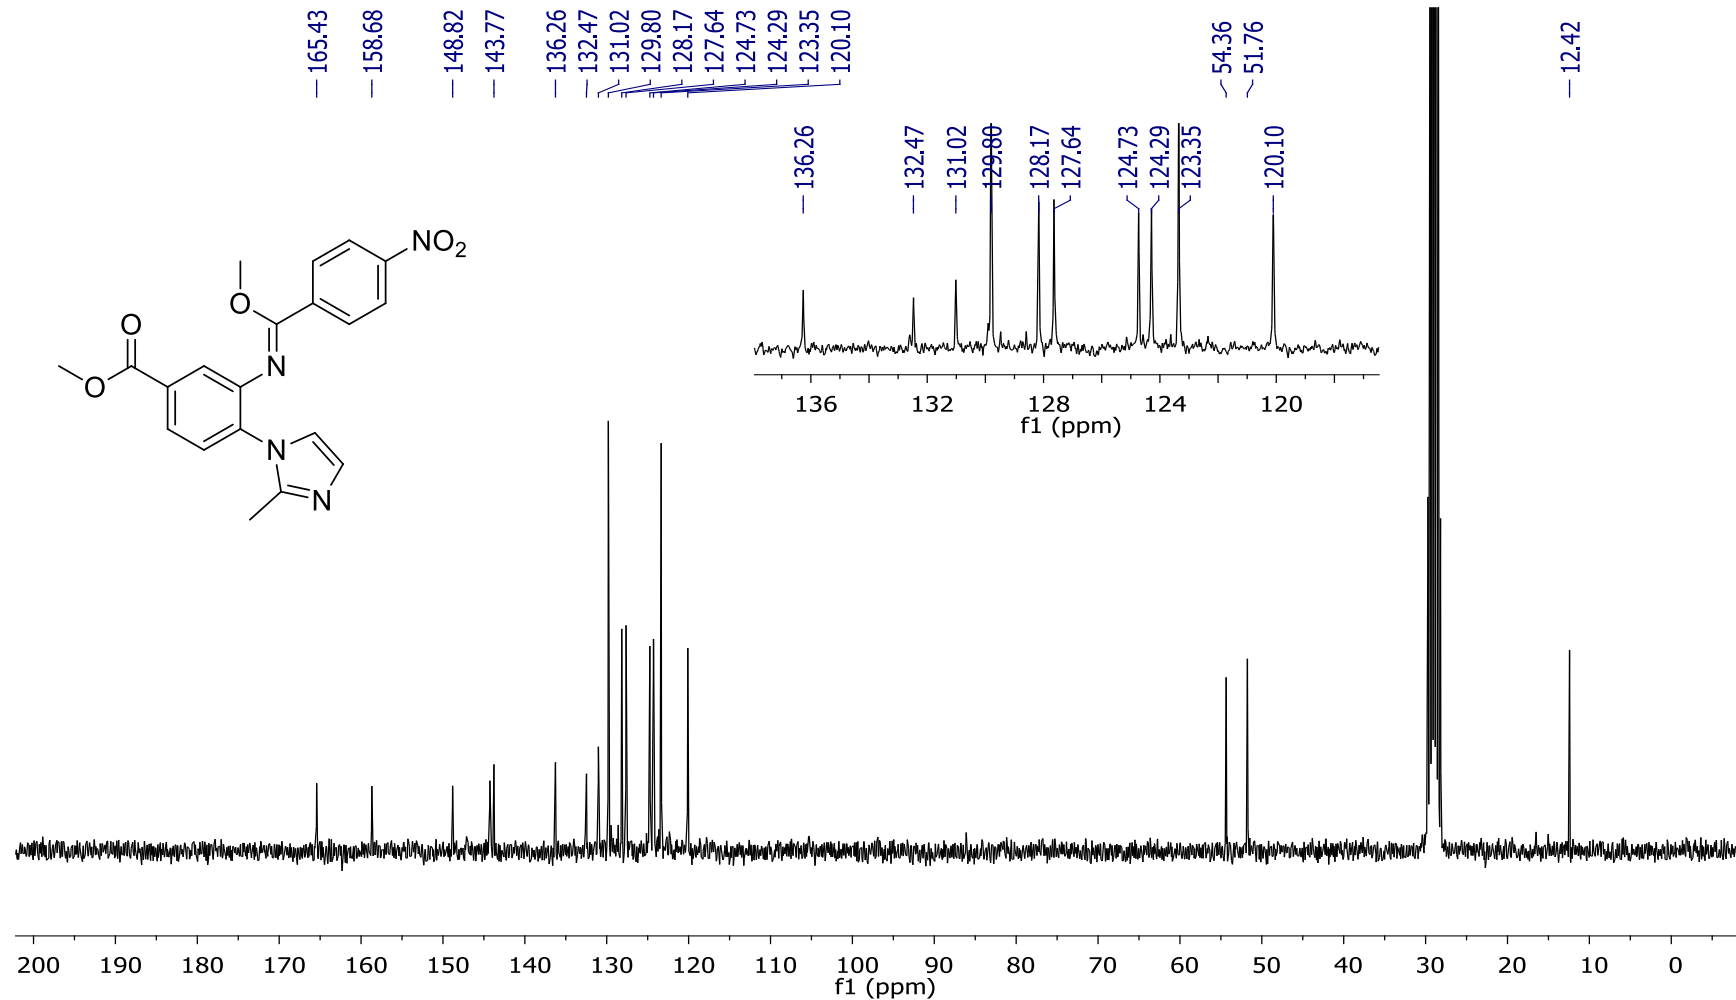

ib-N6-060(II)

20131022007 40 (1.407) Cn (Cen,2, 80.00, Ht); Sm (Mn, 2x0.75); Sb (3,40.00); Cm (40:48-23:30x3.000)

Scan ES+  
1.05e8

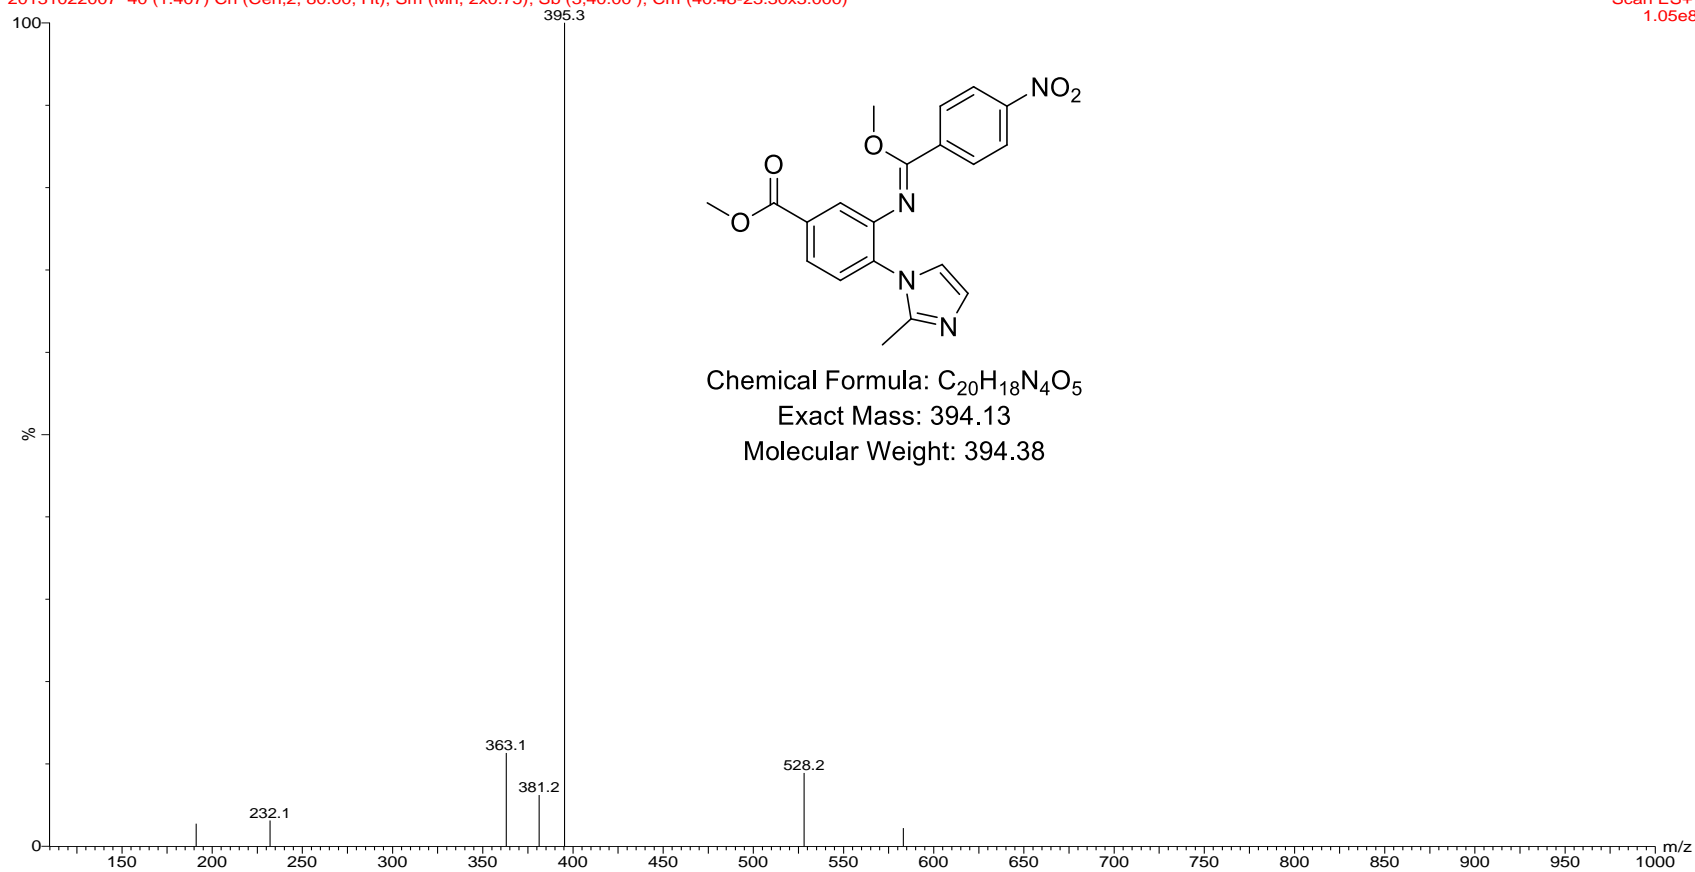

ESI-LRMS of compound **13i**

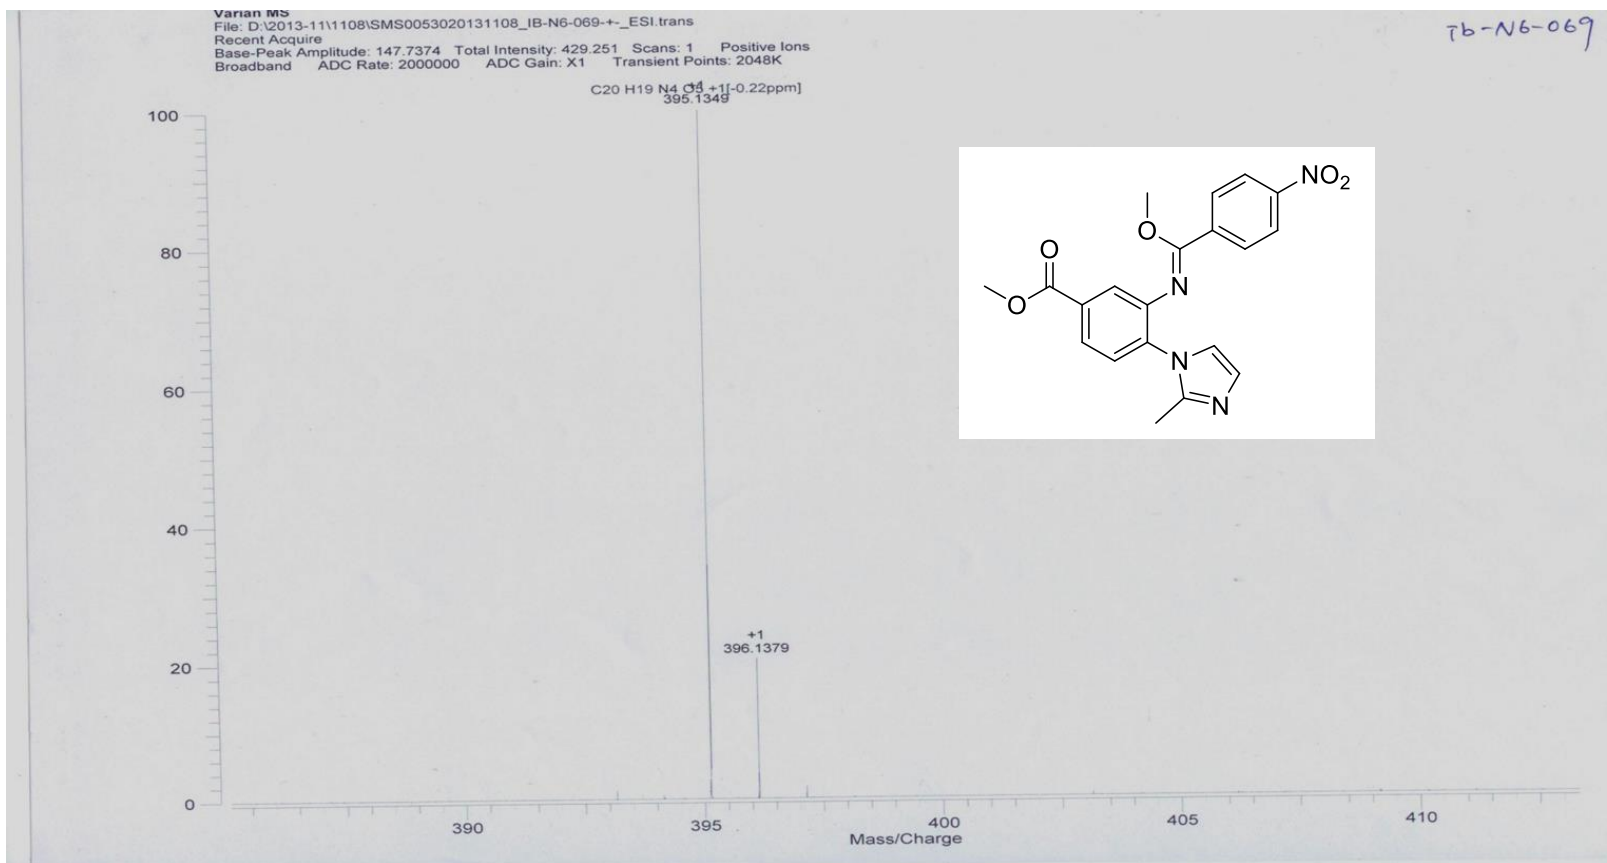

ESI-HRMS of compound **13i**

### 9. $^1\text{H}$ NMR, $^{13}\text{C}$ NMR, LRMS and HRMS of Compound 14a-c

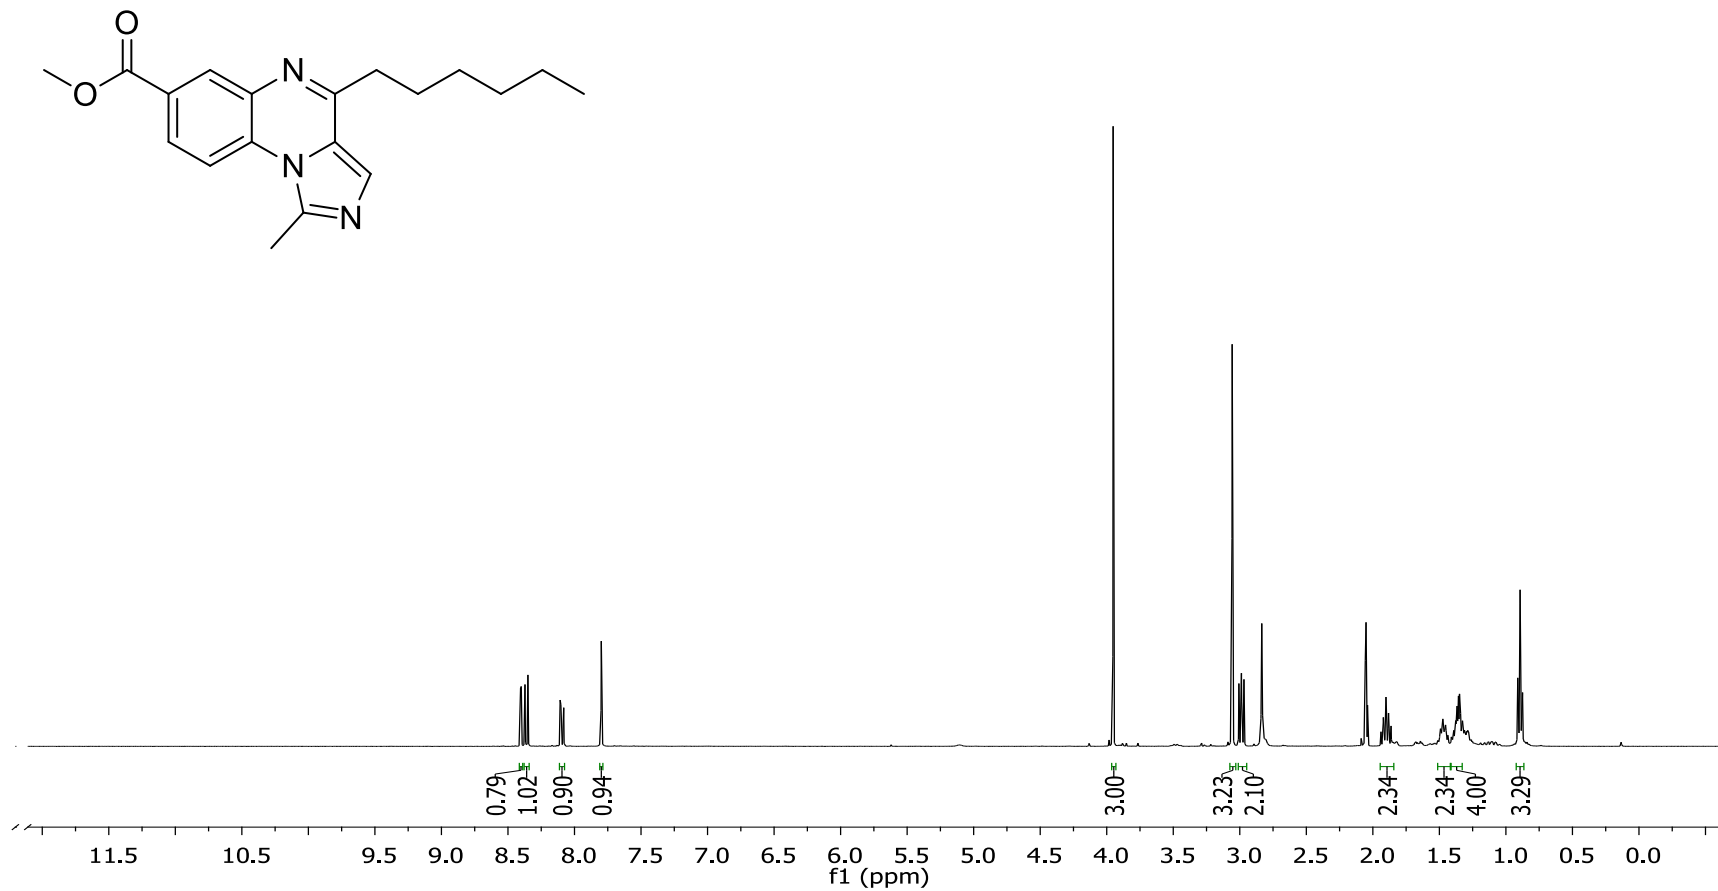

$^1\text{H}$  NMR spectrum (400 MHz) of compound **14a** in Acetone- $\text{d}_6$

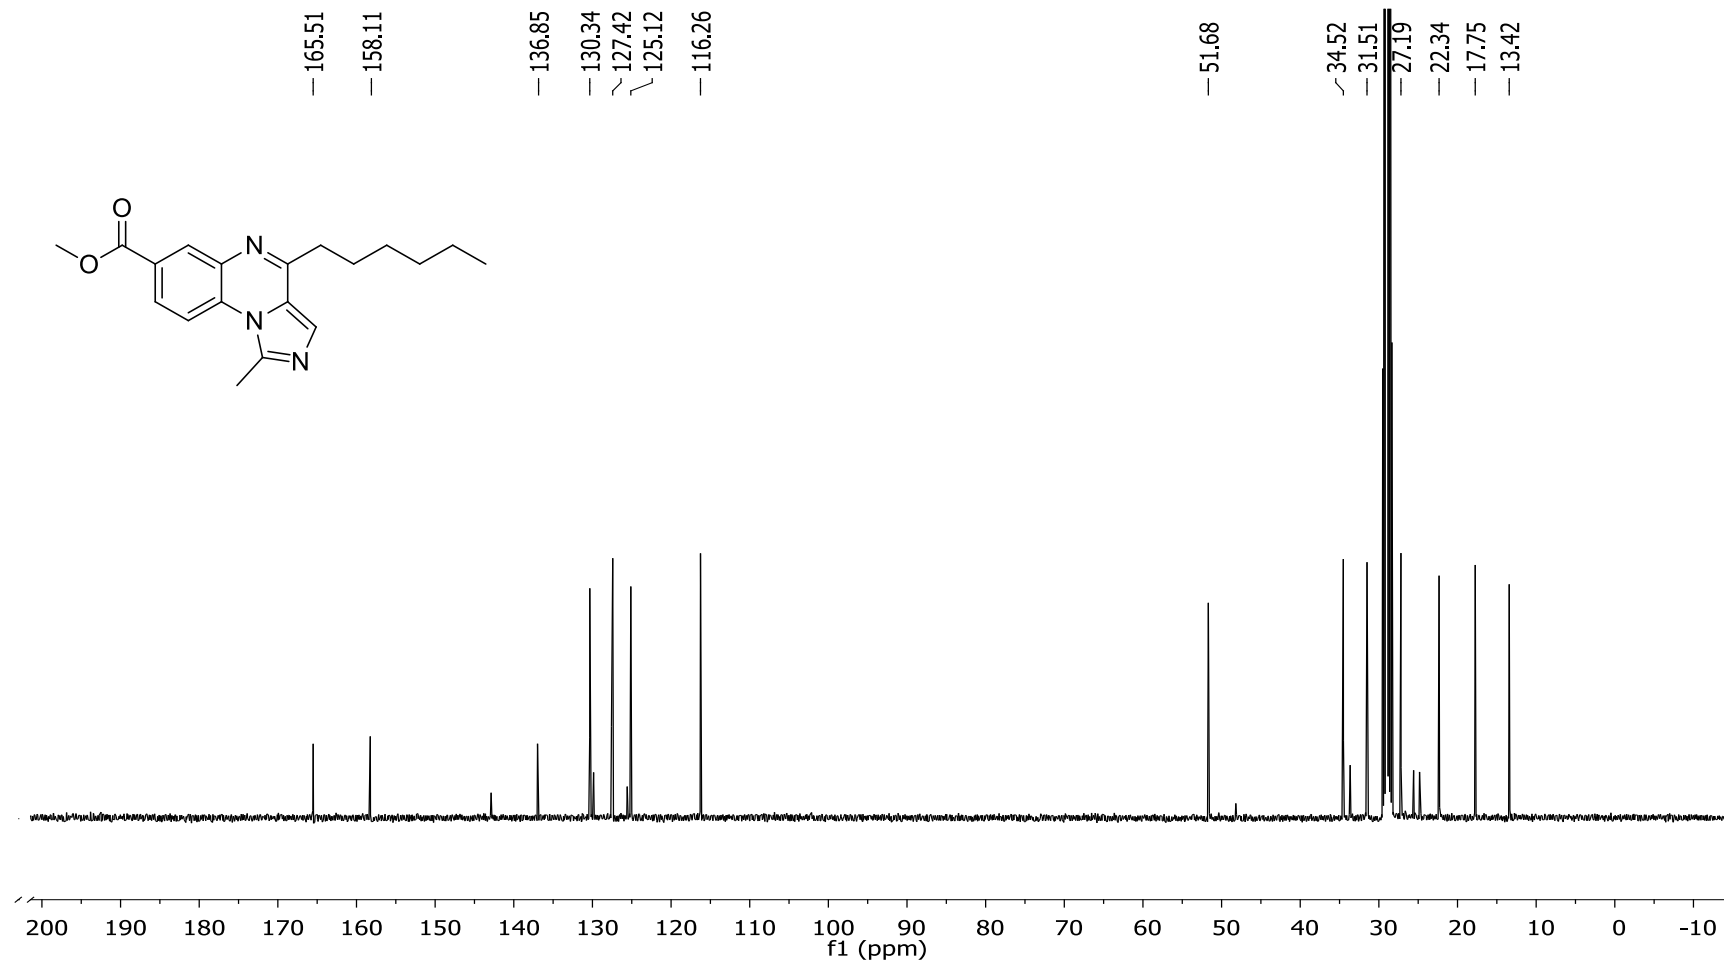

$^{13}\text{C}$  NMR spectrum (101 MHz) of compound **14a** in Acetone- $\text{d}_6$

ib-n10-042

201512290035 10 (0.685) Cn (Cen,3, 50.00, Ht); Sm (Mn, 2x0.75); Sb (3,50.00 ); Cm (8:10-5:7)

Scan ES+  
1.06e8

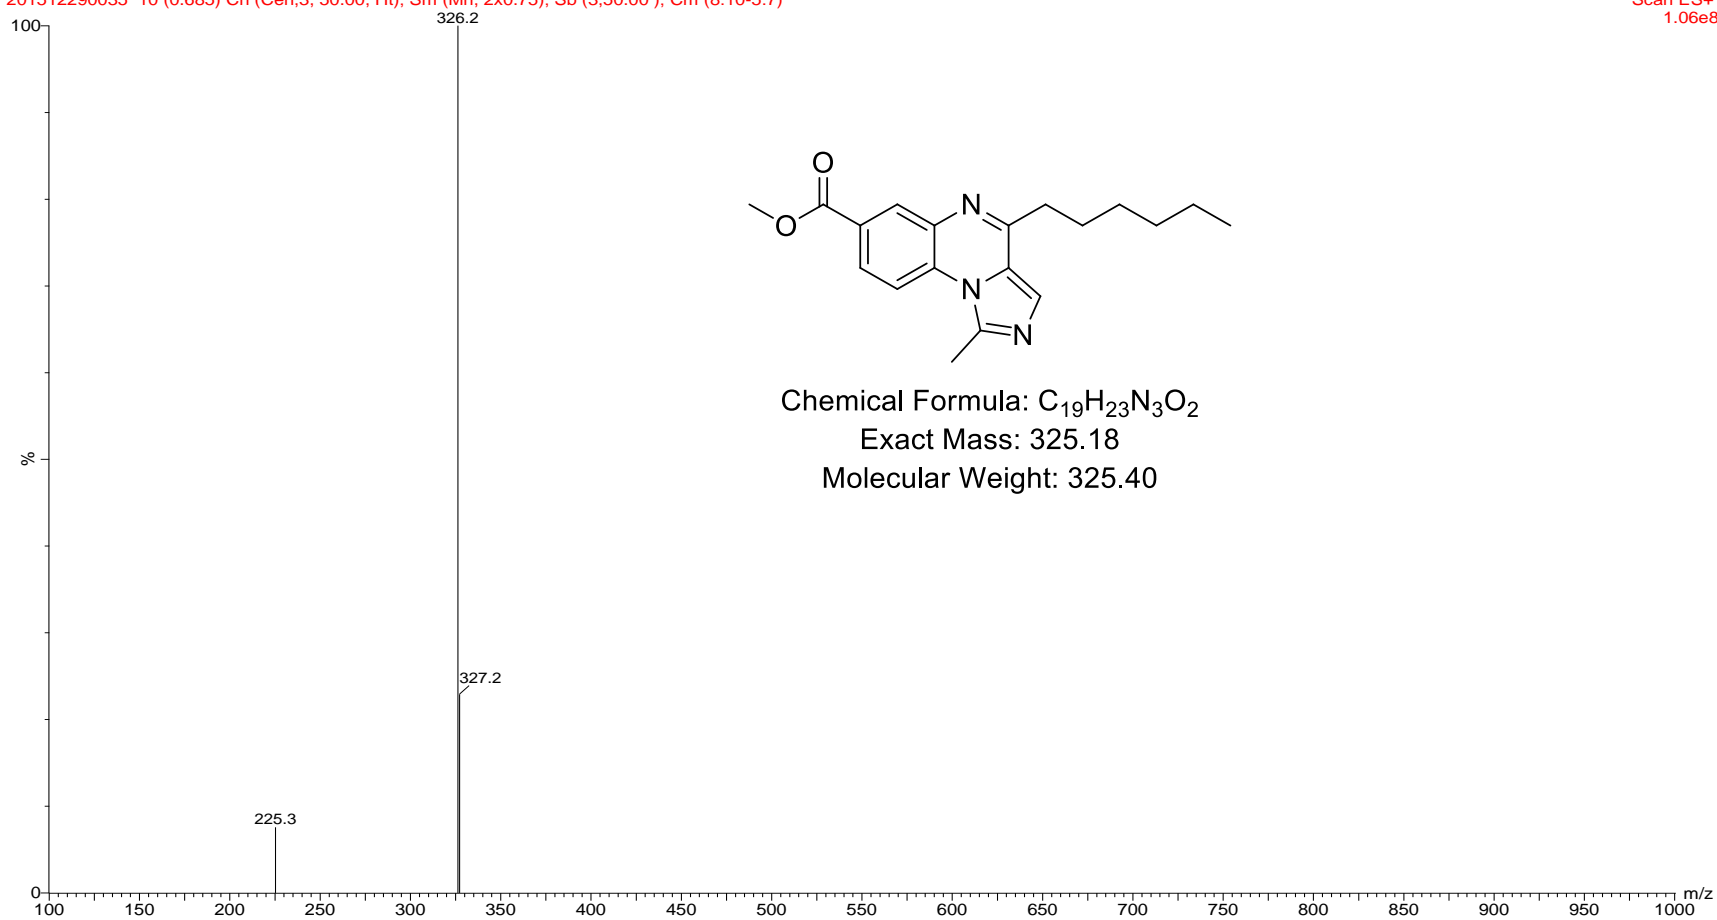

ESI-LRMS of compound **14a**



## Display Report

### Analysis Info

Analysis Name D:\Data\nctu service\data\2016\20160202\ib-N10-042 ESI+\_BA2\_01\_8704.d  
Method Small molecule.m  
Sample Name ib-N10-042 ESI+  
Comment

Acquisition Date 2/2/2016 12:29:43 PM

Operator NCTU

Instrument impact HD

1819896.00164

### Acquisition Parameter

|             |          |                      |          |                  |           |
|-------------|----------|----------------------|----------|------------------|-----------|
| Source Type | ESI      | Ion Polarity         | Positive | Set Nebulizer    | 1.0 Bar   |
| Focus       | Active   | Set Capillary        | 4500 V   | Set Dry Heater   | 200 °C    |
| Scan Begin  | 50 m/z   | Set End Plate Offset | -500 V   | Set Dry Gas      | 6.0 l/min |
| Scan End    | 1500 m/z | Set Charging Voltage | 2000 V   | Set Divert Valve | Waste     |
|             |          | Set Corona           | 0 nA     | Set APCI Heater  | 0 °C      |

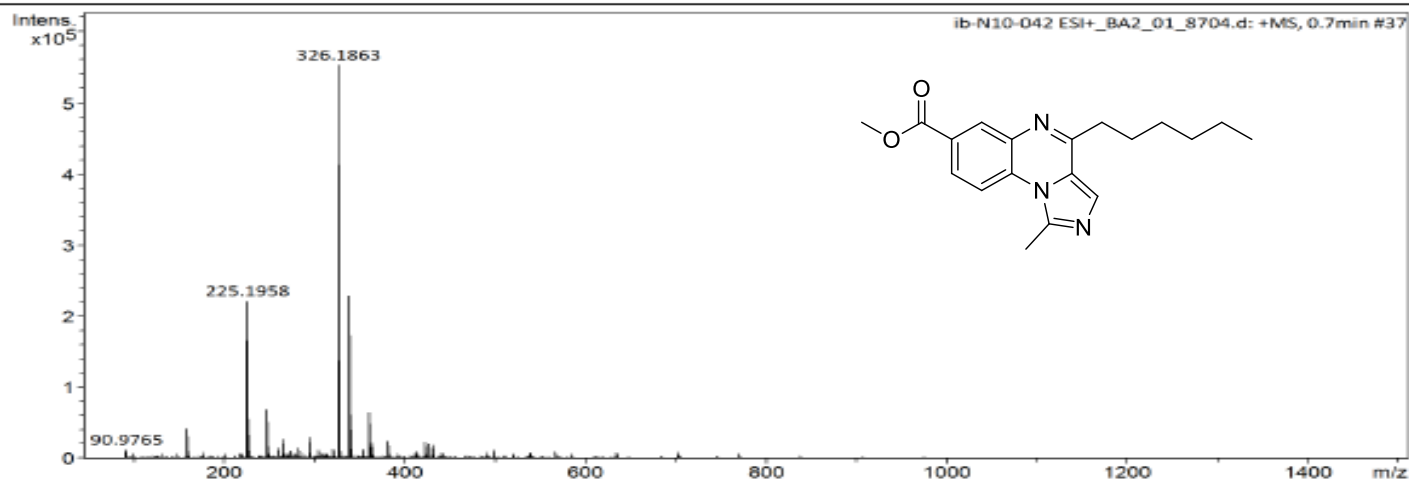

## Display Report

| Meas. m/z | # | Ion Formula | m/z      | err [ppm] | mSigma | # Sigma | Score  | rdb | e <sup>-</sup> Conf | N-Rule | Adduct |
|-----------|---|-------------|----------|-----------|--------|---------|--------|-----|---------------------|--------|--------|
| 326.1863  | 1 | C19H24N3O2  | 326.1863 | -0.0      | 10.8   | 1       | 100.00 | 9.5 | even                | ok     | M      |

ESI-HRMS of compound **14a**

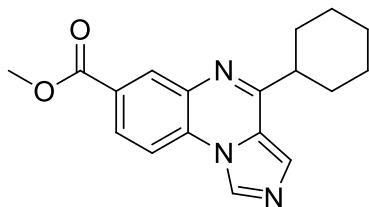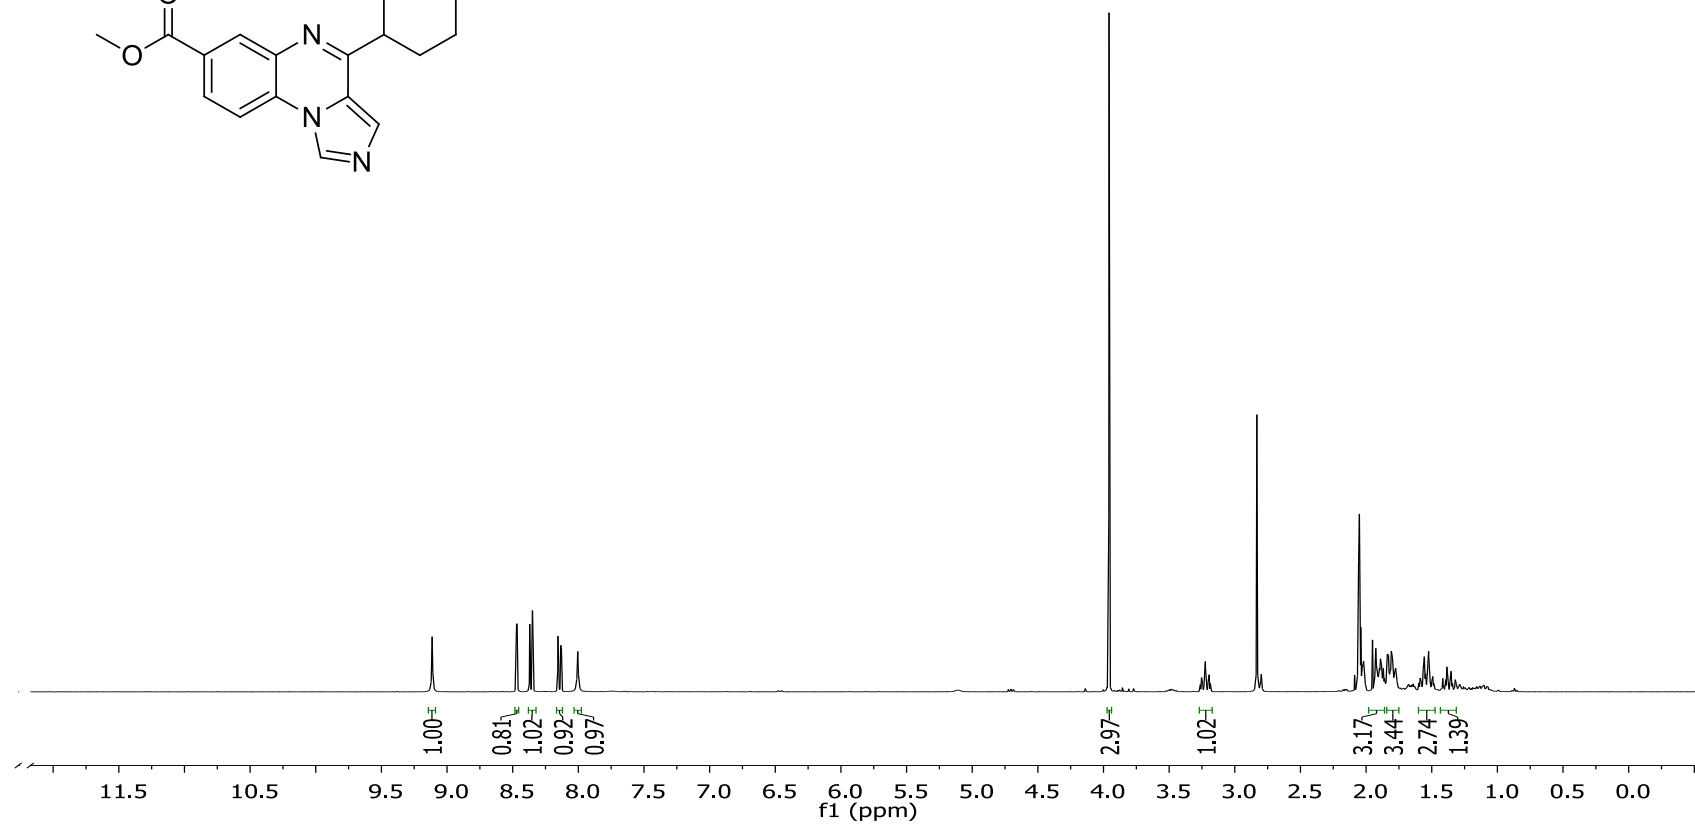

$^1\text{H}$  NMR spectrum (400 MHz) of compound **14b** in Acetone- $\text{d}_6$

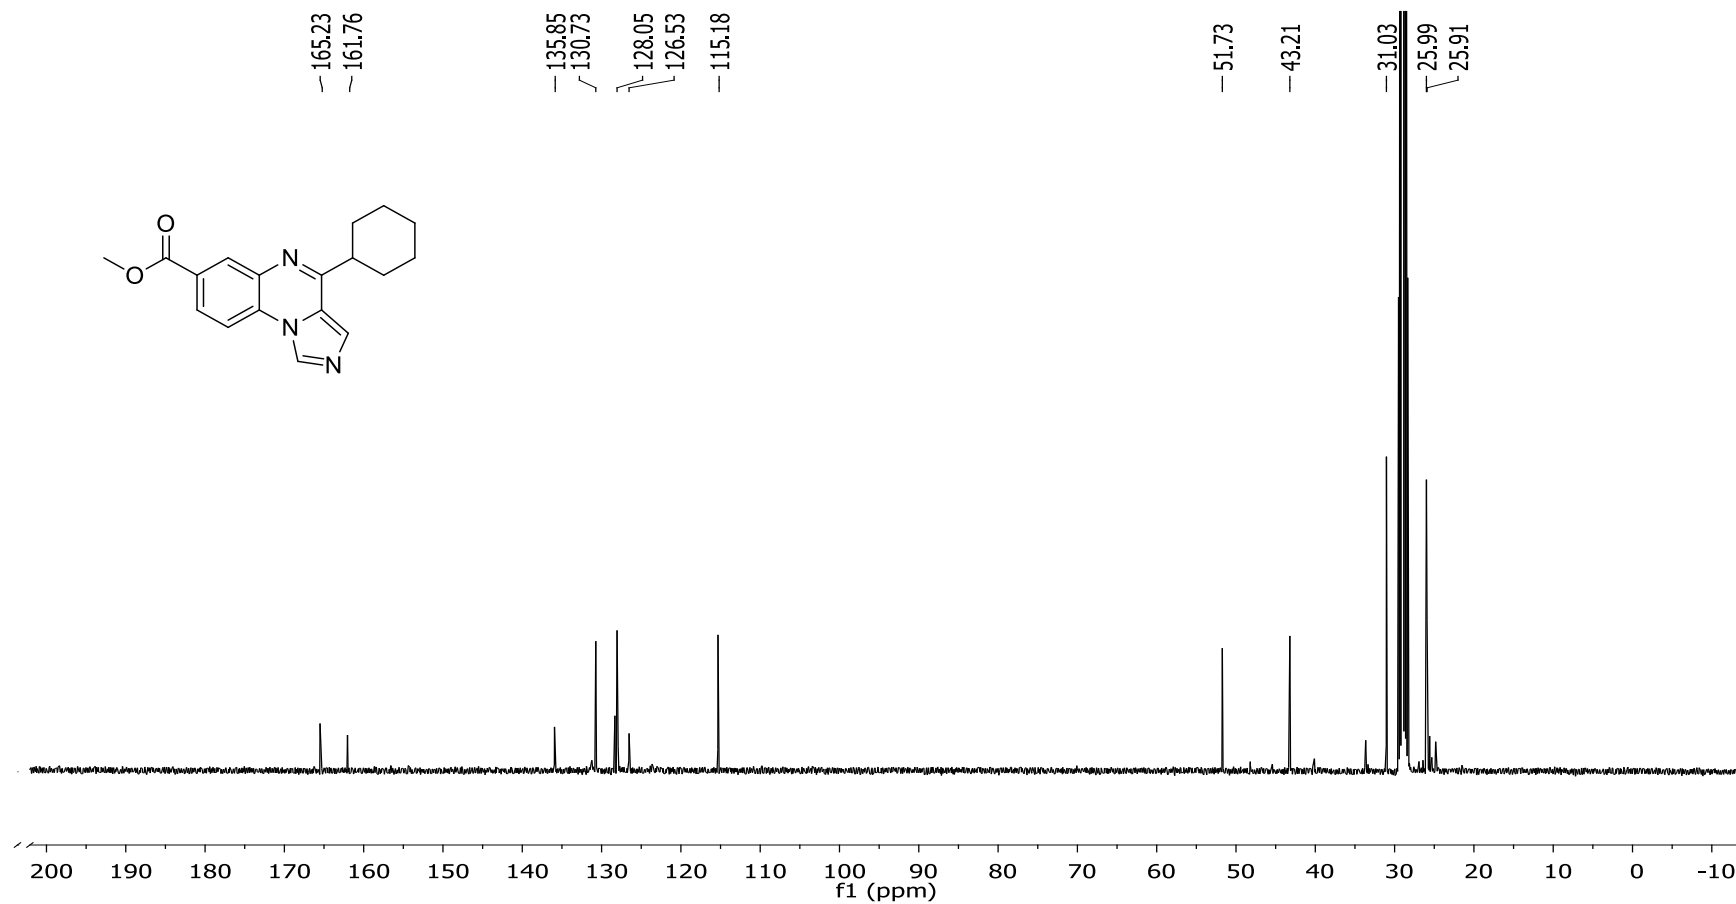

$^{13}\text{C}$  NMR spectrum (101 MHz) of compound **14b** in Acetone- $\text{d}_6$

ib-N10-043

20160105001 34 (2.329) Cn (Cen,3, 50.00, Ht); Sm (Mn, 2x0.75); Sb (3,50.00 ); Cm (34:43-7:12)

Scan ES+  
4.03e7

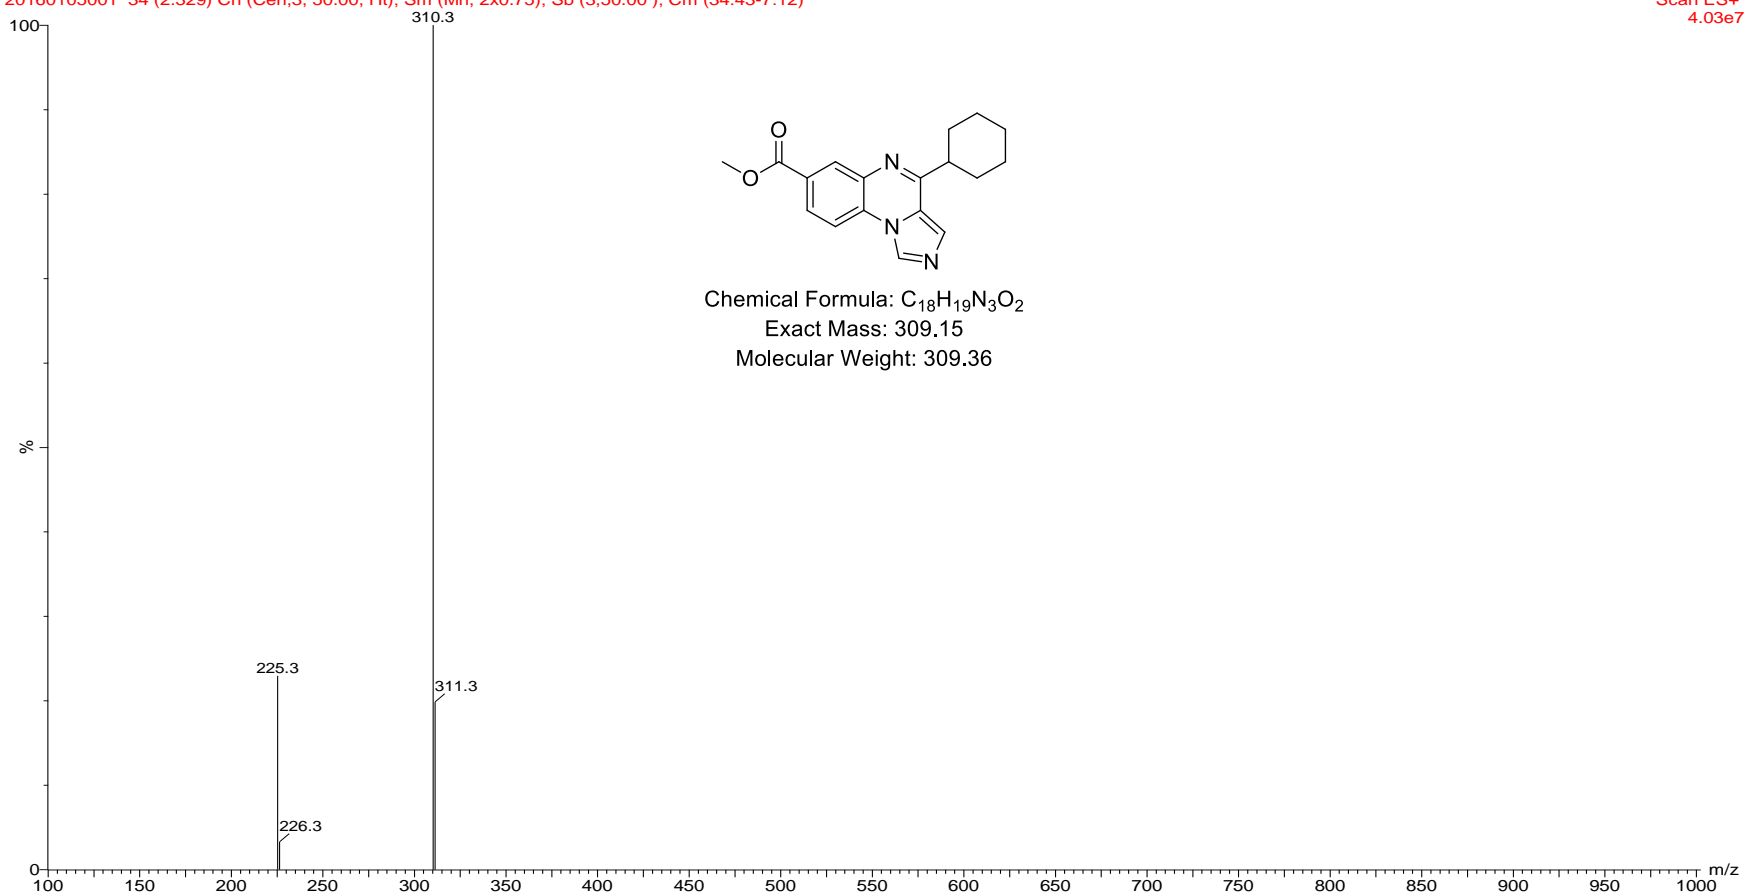

ESI-LRMS of compound **14b**

## Display Report

### Analysis Info

Analysis Name D:\Data\nctu service\data\2016\20160202\ib-N10-043 ESI+\_BA3\_01\_8705.d  
Method Small molecule.m  
Sample Name ib-N10-043 ESI+  
Comment

Acquisition Date 2/2/2016 12:34:01 PM

Operator NCTU

Instrument impact HD 1819896.00164

### Acquisition Parameter

|             |          |                      |          |                  |           |
|-------------|----------|----------------------|----------|------------------|-----------|
| Source Type | ESI      | Ion Polarity         | Positive | Set Nebulizer    | 1.0 Bar   |
| Focus       | Active   | Set Capillary        | 4500 V   | Set Dry Heater   | 200 °C    |
| Scan Begin  | 50 m/z   | Set End Plate Offset | -500 V   | Set Dry Gas      | 6.0 l/min |
| Scan End    | 1500 m/z | Set Charging Voltage | 2000 V   | Set Divert Valve | Waste     |
|             |          | Set Corona           | 0 nA     | Set APCI Heater  | 0 °C      |

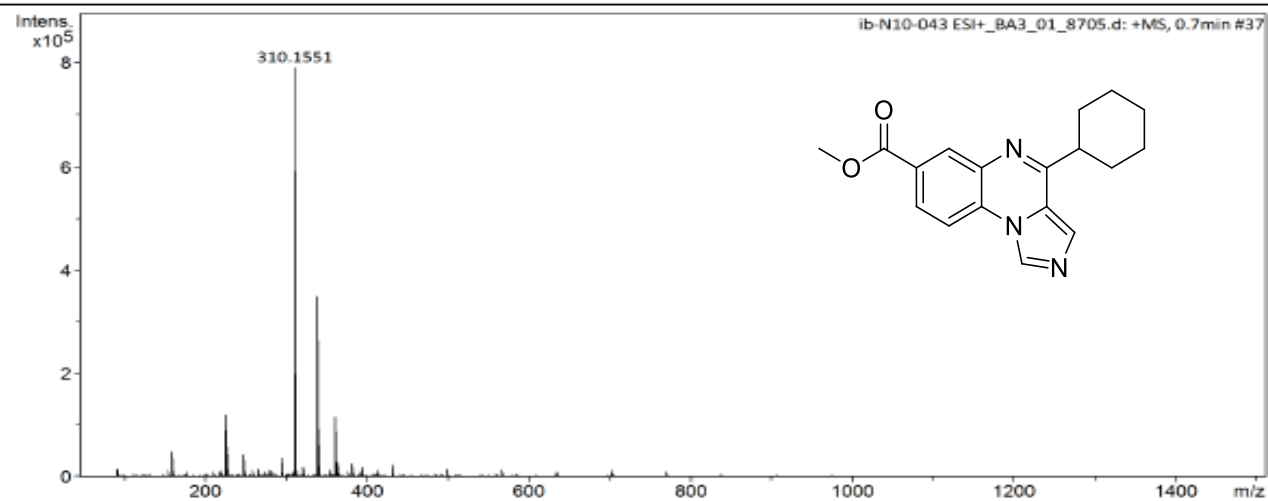

## Display Report

| Meas. m/z | # | Ion Formula | m/z      | err [ppm] | mSigma | # Sigma | Score  | rdb  | e <sup>-</sup> Conf | N-Rule | Adduct |
|-----------|---|-------------|----------|-----------|--------|---------|--------|------|---------------------|--------|--------|
| 310.1551  | 1 | C18H20N3O2  | 310.1550 | -0.2      | 14.0   | 1       | 100.00 | 10.5 | even                | ok     | M      |

ESI-HRMS of compound **14b**

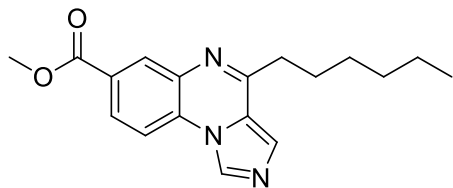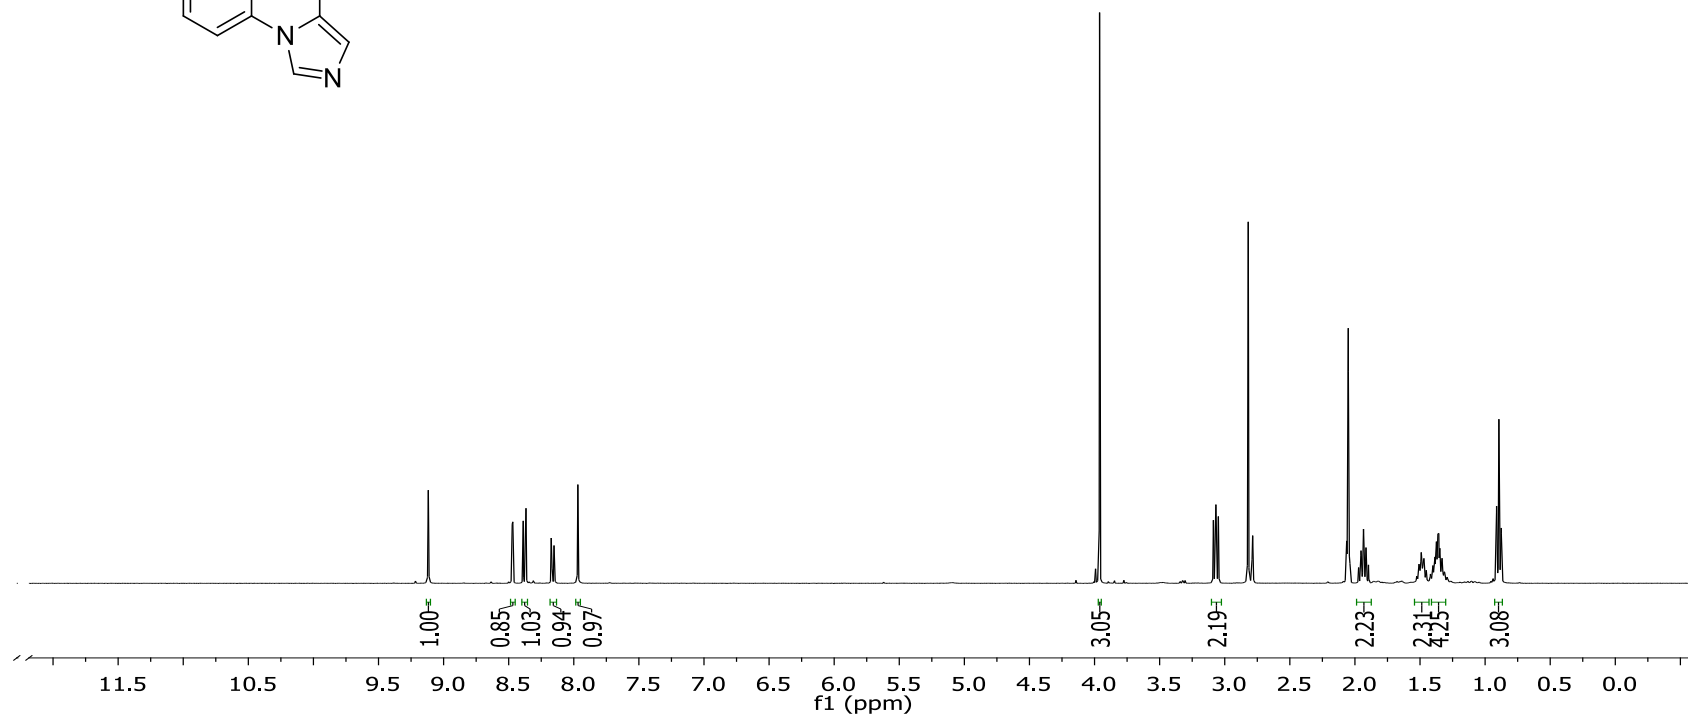

<sup>1</sup>H NMR spectrum (400 MHz) of compound **14c** in Acetone-d<sub>6</sub>

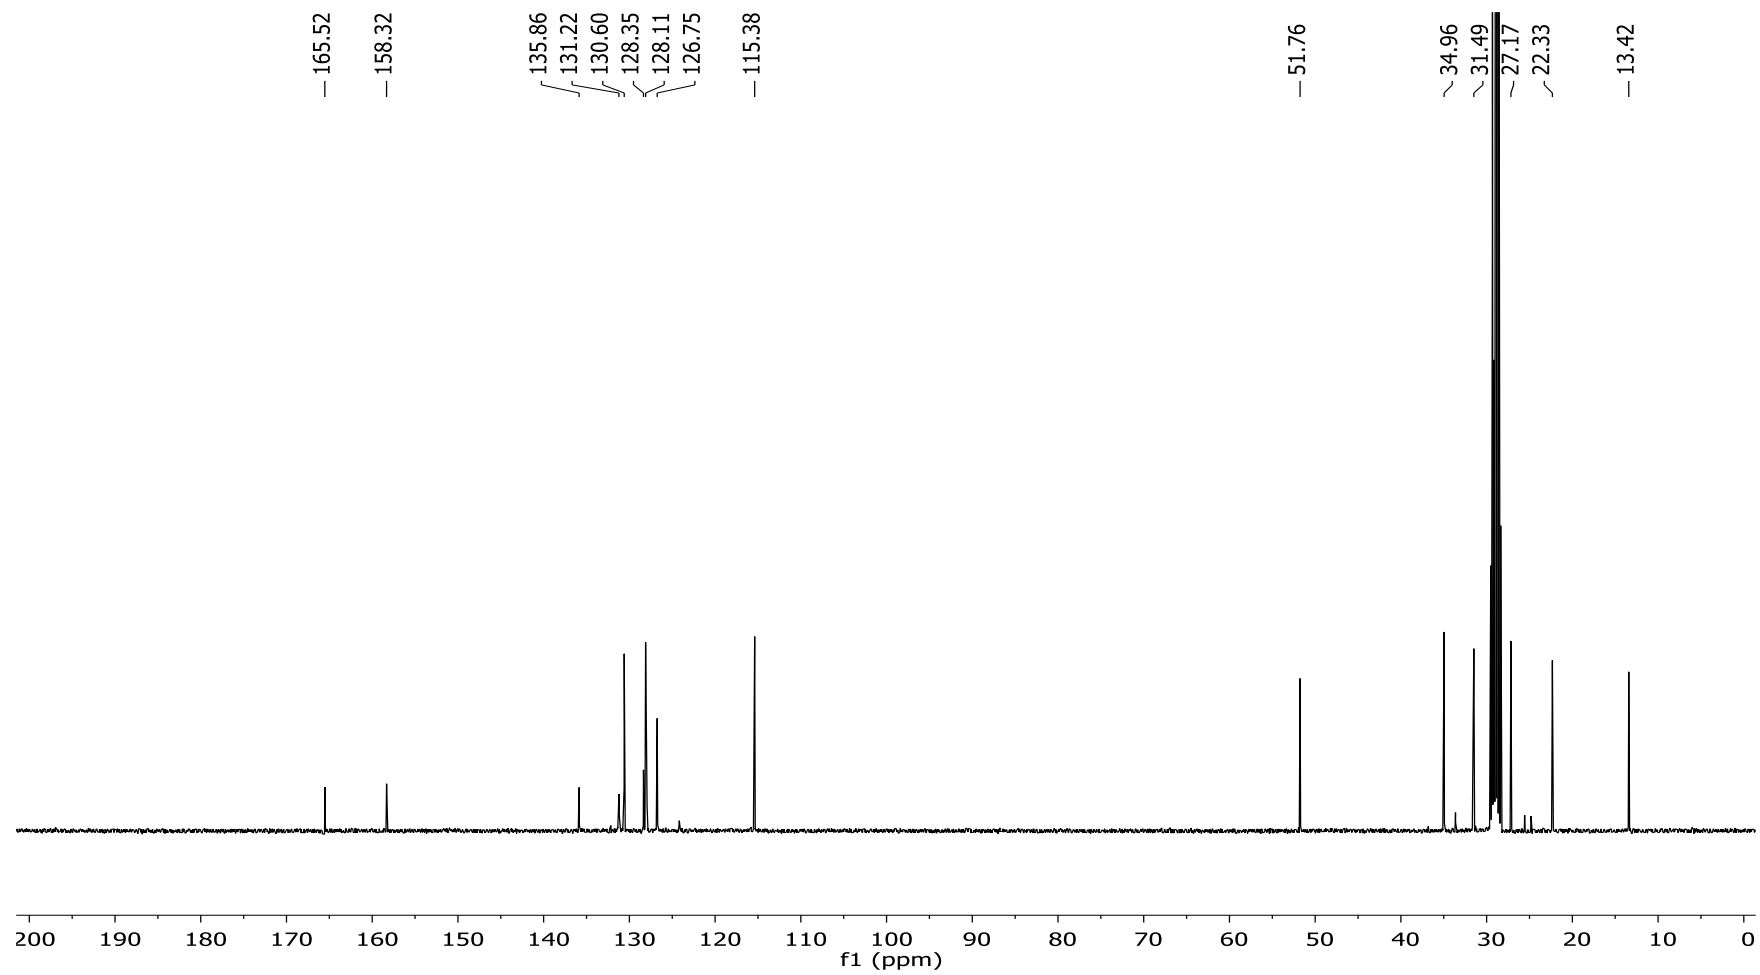

$^{13}\text{C}$  NMR spectrum (101 MHz) of compound **14c** in Acetone- $\text{d}_6$

ib-N10-048

20160119006 22 (1.507) Cn (Cen,3, 80.00, Ht); Sm (Mn, 2x0.75); Sb (3,50.00 ); Cm (21:25-4:6)

Scan ES+  
3.60e7

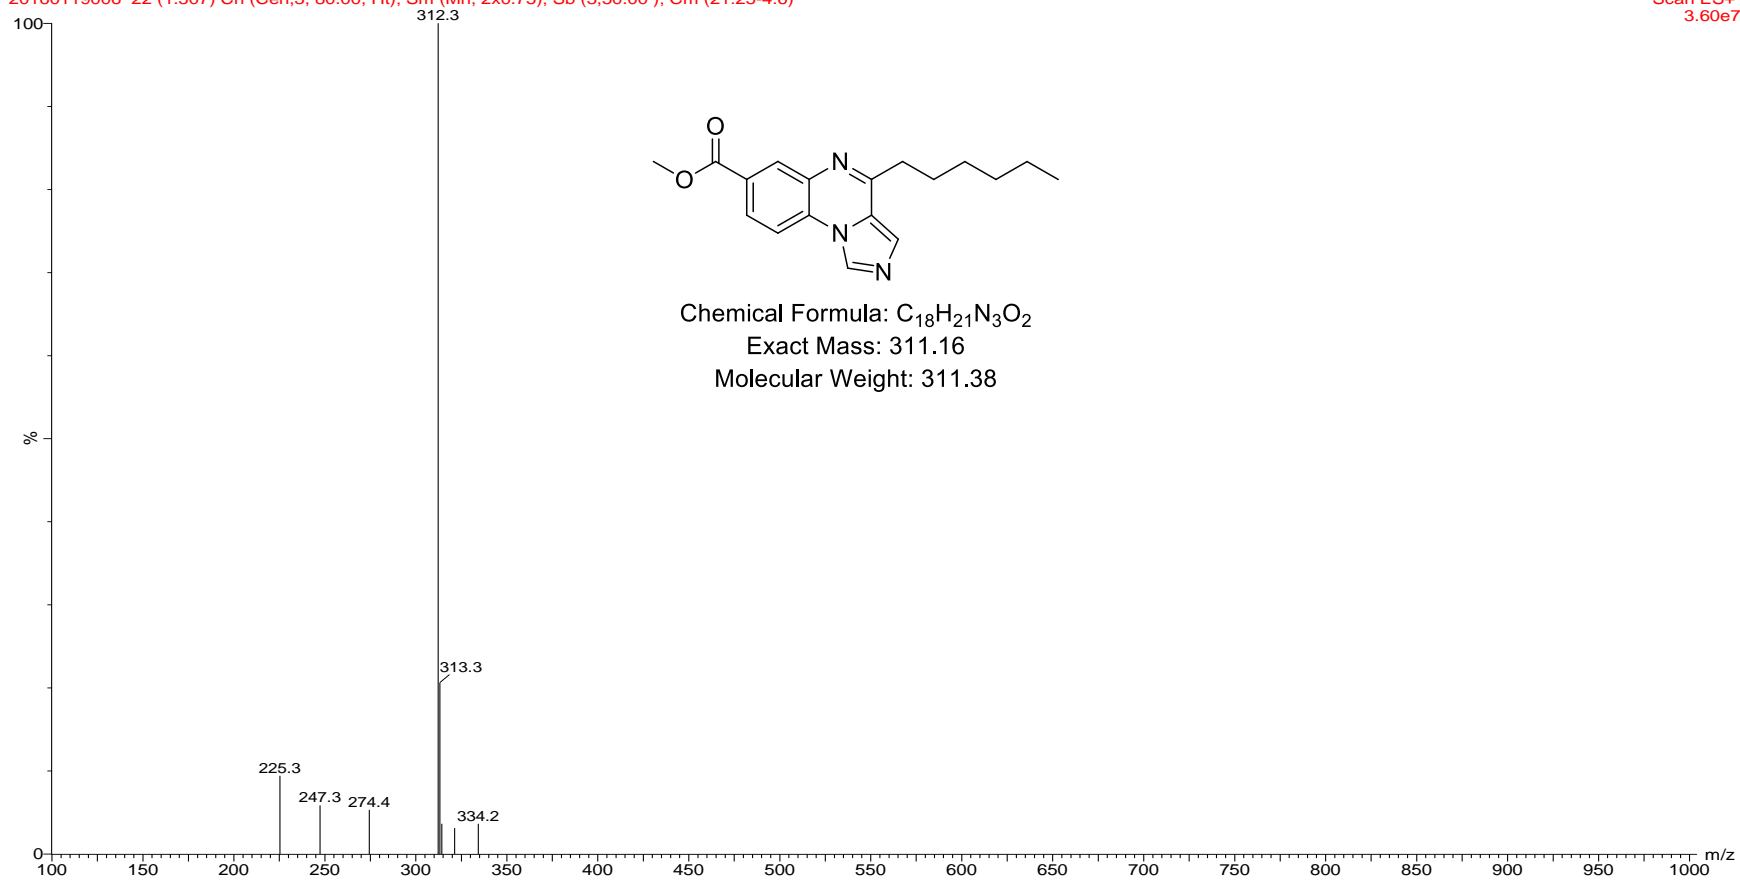

ESI-LRMS of compound **14c**



## Display Report

### Analysis Info

Analysis Name D:\Data\Inctu service\data\2016\20160202\ib-N10-048 ESI+\_BA4\_01\_8706.d  
Method Small molecule.m  
Sample Name ib-N10-048 ESI+  
Comment

Acquisition Date 2/2/2016 12:38:24 PM

Operator NCTU

Instrument impact HD 1819696.00164

### Acquisition Parameter

|             |          |                      |          |                  |           |
|-------------|----------|----------------------|----------|------------------|-----------|
| Source Type | ESI      | Ion Polarity         | Positive | Set Nebulizer    | 1.0 Bar   |
| Focus       | Active   | Set Capillary        | 4500 V   | Set Dry Heater   | 200 °C    |
| Scan Begin  | 50 m/z   | Set End Plate Offset | -500 V   | Set Dry Gas      | 6.0 l/min |
| Scan End    | 1500 m/z | Set Charging Voltage | 2000 V   | Set Divert Valve | Waste     |
|             |          | Set Corona           | 0 nA     | Set APCI Heater  | 0 °C      |

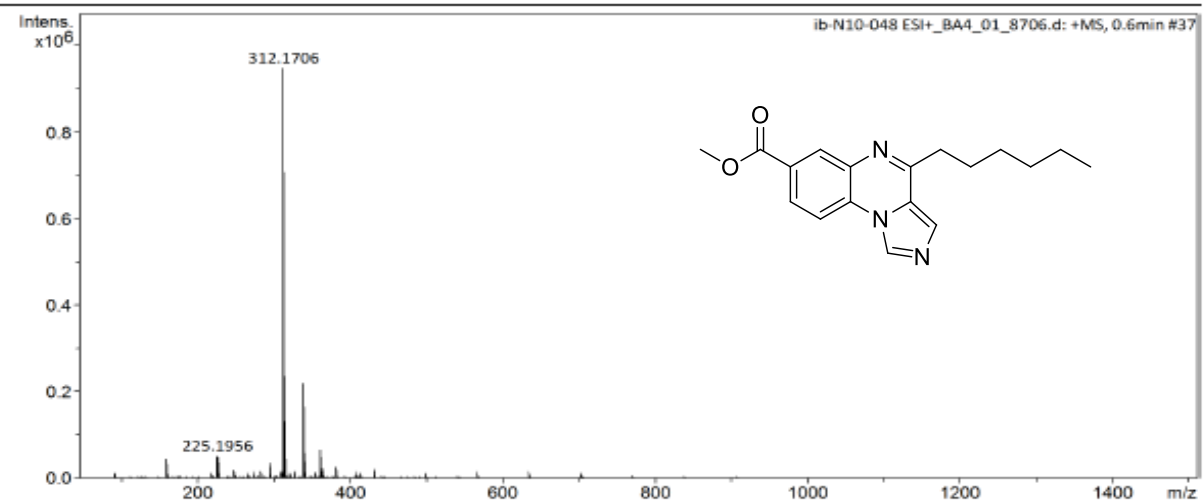

## Display Report

| Meas. m/z | # | Ion Formula | m/z      | err [ppm] | mSigma | # Sigma | Score  | rdb | e <sup>-</sup> Conf | N-Rule | Adduct |
|-----------|---|-------------|----------|-----------|--------|---------|--------|-----|---------------------|--------|--------|
| 312.1708  | 1 | C18H22N3O2  | 312.1707 | 0.1       | 13.0   | 1       | 100.00 | 9.5 | even                | ok     | M      |

ESI-HRMS of compound **14c**

## 10. X-ray crystal data of compound 12a

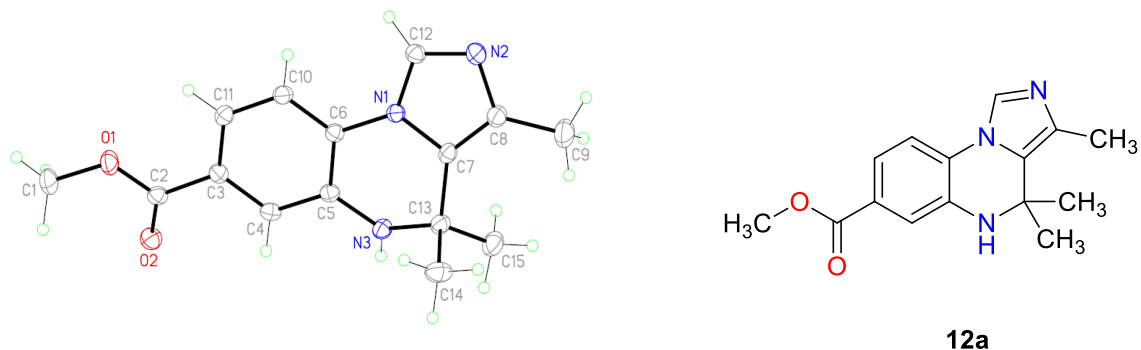

**ORTEP diagram of compound 12a.** Atomic displacement ellipsoids are drawn at the 50% probability level

CCDC no. of **12a**: 891457

Table 1. Crystal data and structure refinement for mo\_120560lt\_0m.

|                        |                                                               |          |
|------------------------|---------------------------------------------------------------|----------|
| Identification code    | mo_120560lt_0m                                                |          |
| Empirical formula      | C <sub>15</sub> H <sub>17</sub> N <sub>3</sub> O <sub>2</sub> |          |
| Formula weight         | 271.32                                                        |          |
| Temperature            | 100(2) K                                                      |          |
| Wavelength             | 0.71073 Å                                                     |          |
| Crystal system         | Orthorhombic                                                  |          |
| Space group            | P b c a                                                       |          |
| Unit cell dimensions   | a = 8.2166(6) Å                                               | α = 90°. |
|                        | b = 15.0686(10) Å                                             | β = 90°. |
|                        | c = 22.6298(15) Å                                             | γ = 90°. |
| Volume                 | 2801.9(3) Å <sup>3</sup>                                      |          |
| Z                      | 8                                                             |          |
| Density (calculated)   | 1.286 Mg/m <sup>3</sup>                                       |          |
| Absorption coefficient | 0.088 mm <sup>-1</sup>                                        |          |
| F(000)                 | 1152                                                          |          |
| Crystal size           | 0.25 x 0.20 x 0.20 mm <sup>3</sup>                            |          |

|                                   |                                             |
|-----------------------------------|---------------------------------------------|
| Theta range for data collection   | 1.80 to 26.48°.                             |
| Index ranges                      | -10<=h<=10, -18<=k<=18, -28<=l<=26          |
| Reflections collected             | 19670                                       |
| Independent reflections           | 2893 [R(int) = 0.0454]                      |
| Completeness to theta = 26.48°    | 99.7 %                                      |
| Absorption correction             | Semi-empirical from equivalents             |
| Max. and min. transmission        | 0.9486 and 0.7938                           |
| Refinement method                 | Full-matrix least-squares on F <sup>2</sup> |
| Data / restraints / parameters    | 2893 / 0 / 185                              |
| Goodness-of-fit on F <sup>2</sup> | 1.033                                       |
| Final R indices [I>2sigma(I)]     | R1 = 0.0438, wR2 = 0.1096                   |
| R indices (all data)              | R1 = 0.0585, wR2 = 0.1185                   |
| Largest diff. peak and hole       | 0.585 and -0.581 e.Å <sup>-3</sup>          |

Table 2. Atomic coordinates ( $\times 10^4$ ) and equivalent isotropic displacement parameters ( $\text{\AA}^2 \times 10^3$ ) for mo\_120560lt\_0m.  $U(\text{eq})$  is defined as one third of the trace of the orthogonalized  $U^{ij}$  tensor.

|       | x       | y       | z       | U(eq) |
|-------|---------|---------|---------|-------|
| O(1)  | 8716(1) | 6133(1) | 5076(1) | 22(1) |
| O(2)  | 7931(1) | 7130(1) | 4397(1) | 24(1) |
| N(1)  | 3548(2) | 3811(1) | 3686(1) | 16(1) |
| N(2)  | 2430(2) | 2549(1) | 3395(1) | 21(1) |
| N(3)  | 3238(2) | 5547(1) | 3361(1) | 17(1) |
| C(1)  | 9864(2) | 6781(1) | 5293(1) | 25(1) |
| C(2)  | 7814(2) | 6399(1) | 4615(1) | 18(1) |
| C(3)  | 6678(2) | 5703(1) | 4404(1) | 16(1) |
| C(4)  | 5486(2) | 5949(1) | 4000(1) | 16(1) |
| C(5)  | 4396(2) | 5323(1) | 3775(1) | 16(1) |
| C(6)  | 4600(2) | 4436(1) | 3952(1) | 16(1) |
| C(7)  | 2223(2) | 4038(1) | 3338(1) | 17(1) |
| C(8)  | 1538(2) | 3255(1) | 3168(1) | 20(1) |
| C(9)  | 48(2)   | 3070(1) | 2805(1) | 34(1) |
| C(10) | 5779(2) | 4189(1) | 4358(1) | 18(1) |
| C(11) | 6815(2) | 4824(1) | 4591(1) | 18(1) |
| C(12) | 3620(2) | 2909(1) | 3700(1) | 18(1) |
| C(13) | 1779(2) | 5005(1) | 3259(1) | 18(1) |
| C(14) | 430(2)  | 5265(1) | 3695(1) | 27(1) |
| C(15) | 1232(2) | 5198(1) | 2625(1) | 26(1) |

Table 3. Bond lengths [ $\text{\AA}$ ] and angles [ $^\circ$ ] for mo\_120560lt\_0m.

|             |            |
|-------------|------------|
| O(1)-C(2)   | 1.340(2)   |
| O(1)-C(1)   | 1.4434(19) |
| O(2)-C(2)   | 1.2113(19) |
| N(1)-C(12)  | 1.361(2)   |
| N(1)-C(7)   | 1.386(2)   |
| N(1)-C(6)   | 1.414(2)   |
| N(2)-C(12)  | 1.314(2)   |
| N(2)-C(8)   | 1.389(2)   |
| N(3)-C(5)   | 1.377(2)   |
| N(3)-C(13)  | 1.469(2)   |
| N(3)-H(3)   | 0.8800     |
| C(1)-H(1A)  | 0.9800     |
| C(1)-H(1B)  | 0.9800     |
| C(1)-H(1C)  | 0.9800     |
| C(2)-C(3)   | 1.483(2)   |
| C(3)-C(4)   | 1.391(2)   |
| C(3)-C(11)  | 1.394(2)   |
| C(4)-C(5)   | 1.396(2)   |
| C(4)-H(4)   | 0.9500     |
| C(5)-C(6)   | 1.406(2)   |
| C(6)-C(10)  | 1.386(2)   |
| C(7)-C(8)   | 1.363(2)   |
| C(7)-C(13)  | 1.513(2)   |
| C(8)-C(9)   | 1.499(2)   |
| C(9)-H(9A)  | 0.9800     |
| C(9)-H(9B)  | 0.9800     |
| C(9)-H(9C)  | 0.9800     |
| C(10)-C(11) | 1.385(2)   |
| C(10)-H(10) | 0.9500     |
| C(11)-H(11) | 0.9500     |

|                  |            |
|------------------|------------|
| C(12)-H(12)      | 0.9500     |
| C(13)-C(15)      | 1.531(2)   |
| C(13)-C(14)      | 1.535(2)   |
| C(14)-H(14A)     | 0.9800     |
| C(14)-H(14B)     | 0.9800     |
| C(14)-H(14C)     | 0.9800     |
| C(15)-H(15A)     | 0.9800     |
| C(15)-H(15B)     | 0.9800     |
| C(15)-H(15C)     | 0.9800     |
| C(2)-O(1)-C(1)   | 115.12(13) |
| C(12)-N(1)-C(7)  | 107.12(13) |
| C(12)-N(1)-C(6)  | 128.98(14) |
| C(7)-N(1)-C(6)   | 123.89(13) |
| C(12)-N(2)-C(8)  | 105.78(13) |
| C(5)-N(3)-C(13)  | 122.34(13) |
| C(5)-N(3)-H(3)   | 118.8      |
| C(13)-N(3)-H(3)  | 118.8      |
| O(1)-C(1)-H(1A)  | 109.5      |
| O(1)-C(1)-H(1B)  | 109.5      |
| H(1A)-C(1)-H(1B) | 109.5      |
| O(1)-C(1)-H(1C)  | 109.5      |
| H(1A)-C(1)-H(1C) | 109.5      |
| H(1B)-C(1)-H(1C) | 109.5      |
| O(2)-C(2)-O(1)   | 122.94(15) |
| O(2)-C(2)-C(3)   | 124.27(15) |
| O(1)-C(2)-C(3)   | 112.79(13) |
| C(4)-C(3)-C(11)  | 120.69(14) |
| C(4)-C(3)-C(2)   | 117.76(14) |
| C(11)-C(3)-C(2)  | 121.52(14) |
| C(3)-C(4)-C(5)   | 120.69(14) |
| C(3)-C(4)-H(4)   | 119.7      |
| C(5)-C(4)-H(4)   | 119.7      |

|                   |            |
|-------------------|------------|
| N(3)-C(5)-C(4)    | 121.69(14) |
| N(3)-C(5)-C(6)    | 120.59(14) |
| C(4)-C(5)-C(6)    | 117.54(14) |
| C(10)-C(6)-C(5)   | 121.86(14) |
| C(10)-C(6)-N(1)   | 122.06(14) |
| C(5)-C(6)-N(1)    | 116.08(14) |
| C(8)-C(7)-N(1)    | 105.74(14) |
| C(8)-C(7)-C(13)   | 134.47(14) |
| N(1)-C(7)-C(13)   | 119.65(14) |
| C(7)-C(8)-N(2)    | 109.85(14) |
| C(7)-C(8)-C(9)    | 130.77(15) |
| N(2)-C(8)-C(9)    | 119.36(15) |
| C(8)-C(9)-H(9A)   | 109.5      |
| C(8)-C(9)-H(9B)   | 109.5      |
| H(9A)-C(9)-H(9B)  | 109.5      |
| C(8)-C(9)-H(9C)   | 109.5      |
| H(9A)-C(9)-H(9C)  | 109.5      |
| H(9B)-C(9)-H(9C)  | 109.5      |
| C(11)-C(10)-C(6)  | 119.72(15) |
| C(11)-C(10)-H(10) | 120.1      |
| C(6)-C(10)-H(10)  | 120.1      |
| C(10)-C(11)-C(3)  | 119.39(15) |
| C(10)-C(11)-H(11) | 120.3      |
| C(3)-C(11)-H(11)  | 120.3      |
| N(2)-C(12)-N(1)   | 111.51(14) |
| N(2)-C(12)-H(12)  | 124.2      |
| N(1)-C(12)-H(12)  | 124.2      |
| N(3)-C(13)-C(7)   | 108.64(12) |
| N(3)-C(13)-C(15)  | 106.36(13) |
| C(7)-C(13)-C(15)  | 111.35(14) |
| N(3)-C(13)-C(14)  | 110.25(13) |
| C(7)-C(13)-C(14)  | 110.08(13) |

|                     |            |
|---------------------|------------|
| C(15)-C(13)-C(14)   | 110.09(14) |
| C(13)-C(14)-H(14A)  | 109.5      |
| C(13)-C(14)-H(14B)  | 109.5      |
| H(14A)-C(14)-H(14B) | 109.5      |
| C(13)-C(14)-H(14C)  | 109.5      |
| H(14A)-C(14)-H(14C) | 109.5      |
| H(14B)-C(14)-H(14C) | 109.5      |
| C(13)-C(15)-H(15A)  | 109.5      |
| C(13)-C(15)-H(15B)  | 109.5      |
| H(15A)-C(15)-H(15B) | 109.5      |
| C(13)-C(15)-H(15C)  | 109.5      |
| H(15A)-C(15)-H(15C) | 109.5      |
| H(15B)-C(15)-H(15C) | 109.5      |

Symmetry transformations used to generate equivalent atoms:



Table 4. Anisotropic displacement parameters ( $\text{\AA}^2 \times 10^3$ ) for mo\_120560lt\_0m. The anisotropic displacement factor exponent takes the form:  $-2\pi^2 [ h^2 a^{*2} U^{11} + \dots + 2 h k a^* b^* U^{12} ]$

|       | U <sup>11</sup> | U <sup>22</sup> | U <sup>33</sup> | U <sup>23</sup> | U <sup>13</sup> | U <sup>12</sup> |
|-------|-----------------|-----------------|-----------------|-----------------|-----------------|-----------------|
| O(1)  | 22(1)           | 20(1)           | 25(1)           | 0(1)            | -5(1)           | -5(1)           |
| O(2)  | 21(1)           | 16(1)           | 33(1)           | 1(1)            | -2(1)           | -3(1)           |
| N(1)  | 15(1)           | 14(1)           | 19(1)           | 0(1)            | 0(1)            | 1(1)            |
| N(2)  | 21(1)           | 18(1)           | 23(1)           | 0(1)            | -2(1)           | -2(1)           |
| N(3)  | 17(1)           | 15(1)           | 20(1)           | 4(1)            | -1(1)           | -1(1)           |
| C(1)  | 23(1)           | 23(1)           | 29(1)           | -3(1)           | -5(1)           | -6(1)           |
| C(2)  | 14(1)           | 18(1)           | 21(1)           | -2(1)           | 4(1)            | 2(1)            |
| C(3)  | 13(1)           | 17(1)           | 19(1)           | -2(1)           | 4(1)            | -1(1)           |
| C(4)  | 17(1)           | 13(1)           | 20(1)           | 1(1)            | 4(1)            | 1(1)            |
| C(5)  | 15(1)           | 17(1)           | 15(1)           | -1(1)           | 3(1)            | 2(1)            |
| C(6)  | 13(1)           | 15(1)           | 18(1)           | -1(1)           | 2(1)            | 0(1)            |
| C(7)  | 14(1)           | 20(1)           | 16(1)           | 0(1)            | 0(1)            | 1(1)            |
| C(8)  | 19(1)           | 20(1)           | 23(1)           | 2(1)            | -2(1)           | -1(1)           |
| C(9)  | 32(1)           | 27(1)           | 42(1)           | 1(1)            | -16(1)          | -6(1)           |
| C(10) | 17(1)           | 15(1)           | 22(1)           | 1(1)            | 0(1)            | 2(1)            |
| C(11) | 14(1)           | 19(1)           | 21(1)           | 0(1)            | -1(1)           | 1(1)            |
| C(12) | 18(1)           | 14(1)           | 22(1)           | 1(1)            | 0(1)            | 0(1)            |
| C(13) | 15(1)           | 17(1)           | 22(1)           | 1(1)            | 0(1)            | 0(1)            |
| C(14) | 22(1)           | 22(1)           | 38(1)           | 0(1)            | 7(1)            | 4(1)            |
| C(15) | 26(1)           | 24(1)           | 30(1)           | 5(1)            | -9(1)           | 0(1)            |

Table 5. Hydrogen coordinates ( $\times 10^4$ ) and isotropic displacement parameters ( $\text{\AA}^2 \times 10^{-3}$ ) for mo\_120560lt\_0m.

|        | x     | y    | z    | U(eq) |
|--------|-------|------|------|-------|
| H(3)   | 3378  | 6032 | 3150 | 21    |
| H(1A)  | 10675 | 6906 | 4986 | 38    |
| H(1B)  | 10409 | 6548 | 5645 | 38    |
| H(1C)  | 9287  | 7329 | 5394 | 38    |
| H(4)   | 5412  | 6550 | 3875 | 20    |
| H(9A)  | -876  | 3401 | 2967 | 51    |
| H(9B)  | -193  | 2433 | 2816 | 51    |
| H(9C)  | 240   | 3253 | 2396 | 51    |
| H(10)  | 5876  | 3586 | 4477 | 22    |
| H(11)  | 7611  | 4663 | 4876 | 22    |
| H(12)  | 4429  | 2580 | 3905 | 22    |
| H(14A) | 803   | 5156 | 4100 | 40    |
| H(14B) | -544  | 4909 | 3617 | 40    |
| H(14C) | 171   | 5896 | 3648 | 40    |
| H(15A) | 1091  | 5839 | 2573 | 40    |
| H(15B) | 198   | 4896 | 2547 | 40    |
| H(15C) | 2059  | 4981 | 2348 | 40    |

## 11. X-ray crystal data of compound 13c

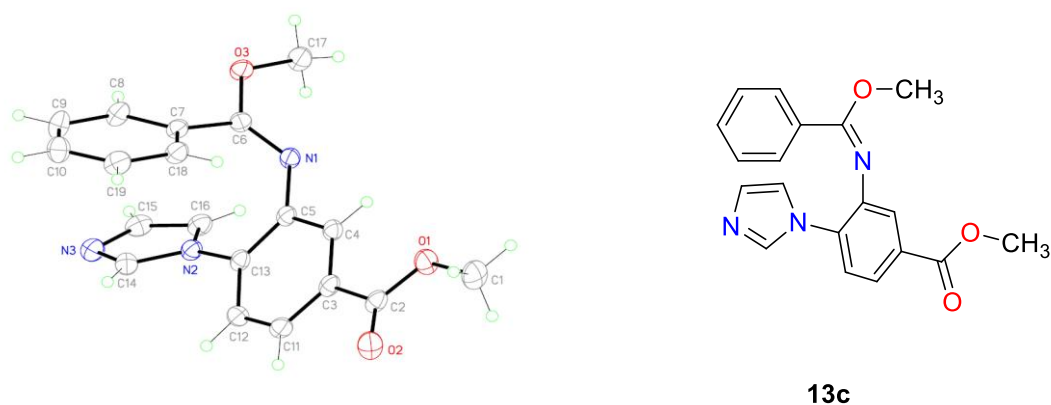

**ORTEP diagram of compound 13c.** Atomic displacement ellipsoids are drawn at the 50% probability level

CCDC no. of **13c**: 891458

Table 1. Crystal data and structure refinement for mo\_120626lt\_0m.

|                        |                                                               |                                          |
|------------------------|---------------------------------------------------------------|------------------------------------------|
| Identification code    | mo_120626lt_0m                                                |                                          |
| Empirical formula      | C <sub>19</sub> H <sub>17</sub> N <sub>3</sub> O <sub>3</sub> |                                          |
| Formula weight         | 335.36                                                        |                                          |
| Temperature            | 100(2) K                                                      |                                          |
| Wavelength             | 0.71073 Å                                                     |                                          |
| Crystal system         | Monoclinic                                                    |                                          |
| Space group            | P 1 21/n 1                                                    |                                          |
| Unit cell dimensions   | a = 11.587(2) Å<br>b = 10.3387(17) Å<br>c = 14.091(2) Å       | α = 90°.<br>β = 101.378(4)°.<br>γ = 90°. |
| Volume                 | 1654.9(5) Å <sup>3</sup>                                      |                                          |
| Z                      | 4                                                             |                                          |
| Density (calculated)   | 1.346 Mg/m <sup>3</sup>                                       |                                          |
| Absorption coefficient | 0.093 mm <sup>-1</sup>                                        |                                          |

|                                   |                                             |
|-----------------------------------|---------------------------------------------|
| F(000)                            | 704                                         |
| Crystal size                      | 0.30 x 0.25 x 0.25 mm <sup>3</sup>          |
| Theta range for data collection   | 2.08 to 26.52°.                             |
| Index ranges                      | -14<=h<=14, -11<=k<=12, -17<=l<=17          |
| Reflections collected             | 11817                                       |
| Independent reflections           | 3378 [R(int) = 0.0555]                      |
| Completeness to theta = 26.52°    | 98.3 %                                      |
| Absorption correction             | Semi-empirical from equivalents             |
| Max. and min. transmission        | 0.9486 and 0.6285                           |
| Refinement method                 | Full-matrix least-squares on F <sup>2</sup> |
| Data / restraints / parameters    | 3378 / 0 / 228                              |
| Goodness-of-fit on F <sup>2</sup> | 1.035                                       |
| Final R indices [I>2sigma(I)]     | R1 = 0.0434, wR2 = 0.1087                   |
| R indices (all data)              | R1 = 0.0618, wR2 = 0.1192                   |
| Largest diff. peak and hole       | 0.348 and -0.319 e.Å <sup>-3</sup>          |

Table 2. Atomic coordinates ( $\times 10^4$ ) and equivalent isotropic displacement parameters ( $\text{\AA}^2 \times 10^3$ ) for mo\_120626lt\_0m.  $U(\text{eq})$  is defined as one third of the trace of the orthogonalized  $U^{ij}$  tensor.

|       | x        | y        | z       | U(eq) |
|-------|----------|----------|---------|-------|
| O(1)  | 4818(1)  | 1691(1)  | 5636(1) | 30(1) |
| O(2)  | 4337(1)  | 164(1)   | 6622(1) | 33(1) |
| O(3)  | 10928(1) | 2340(1)  | 6042(1) | 24(1) |
| N(1)  | 9185(1)  | 2274(1)  | 6556(1) | 21(1) |
| N(2)  | 9824(1)  | 930(1)   | 8421(1) | 21(1) |
| N(3)  | 11452(1) | 79(1)    | 9299(1) | 29(1) |
| C(1)  | 3602(1)  | 1705(2)  | 5120(1) | 35(1) |
| C(2)  | 5065(1)  | 868(2)   | 6382(1) | 23(1) |
| C(3)  | 6323(1)  | 923(2)   | 6886(1) | 21(1) |
| C(4)  | 7169(1)  | 1614(2)  | 6512(1) | 21(1) |
| C(5)  | 8349(1)  | 1605(1)  | 6984(1) | 20(1) |
| C(6)  | 10071(1) | 1677(2)  | 6350(1) | 20(1) |
| C(7)  | 10334(1) | 268(2)   | 6418(1) | 21(1) |
| C(8)  | 11475(1) | -159(2)  | 6790(1) | 26(1) |
| C(9)  | 11698(2) | -1467(2) | 6918(1) | 32(1) |
| C(10) | 10799(2) | -2363(2) | 6667(1) | 32(1) |
| C(11) | 6641(1)  | 250(2)   | 7750(1) | 24(1) |
| C(12) | 7788(1)  | 304(2)   | 8258(1) | 24(1) |
| C(13) | 8642(1)  | 973(2)   | 7880(1) | 20(1) |
| C(14) | 10371(1) | -146(2)  | 8845(1) | 26(1) |
| C(15) | 11610(1) | 1384(2)  | 9163(1) | 27(1) |
| C(16) | 10627(1) | 1930(2)  | 8625(1) | 24(1) |
| C(17) | 10791(1) | 3726(2)  | 5974(1) | 29(1) |
| C(18) | 9437(1)  | -639(2)  | 6149(1) | 24(1) |
| C(19) | 9669(1)  | -1945(2) | 6274(1) | 29(1) |

Table 3. Bond lengths [ $\text{\AA}$ ] and angles [ $^\circ$ ] for mo\_120626lt\_0m.

|             |            |
|-------------|------------|
| O(1)-C(2)   | 1.339(2)   |
| O(1)-C(1)   | 1.4525(18) |
| O(2)-C(2)   | 1.2115(19) |
| O(3)-C(6)   | 1.3472(18) |
| O(3)-C(17)  | 1.4424(19) |
| N(1)-C(6)   | 1.2796(19) |
| N(1)-C(5)   | 1.4178(19) |
| N(2)-C(14)  | 1.360(2)   |
| N(2)-C(16)  | 1.383(2)   |
| N(2)-C(13)  | 1.4306(18) |
| N(3)-C(14)  | 1.310(2)   |
| N(3)-C(15)  | 1.380(2)   |
| C(1)-H(1A)  | 0.9800     |
| C(1)-H(1B)  | 0.9800     |
| C(1)-H(1C)  | 0.9800     |
| C(2)-C(3)   | 1.492(2)   |
| C(3)-C(11)  | 1.386(2)   |
| C(3)-C(4)   | 1.398(2)   |
| C(4)-C(5)   | 1.398(2)   |
| C(4)-H(4)   | 0.9500     |
| C(5)-C(13)  | 1.402(2)   |
| C(6)-C(7)   | 1.488(2)   |
| C(7)-C(8)   | 1.394(2)   |
| C(7)-C(18)  | 1.396(2)   |
| C(8)-C(9)   | 1.382(2)   |
| C(8)-H(8)   | 0.9500     |
| C(9)-C(10)  | 1.386(2)   |
| C(9)-H(9)   | 0.9500     |
| C(10)-C(19) | 1.386(2)   |
| C(10)-H(10) | 0.9500     |
| C(11)-C(12) | 1.381(2)   |
| C(11)-H(11) | 0.9500     |

|                  |            |
|------------------|------------|
| C(12)-C(13)      | 1.396(2)   |
| C(12)-H(12)      | 0.9500     |
| C(14)-H(14)      | 0.9500     |
| C(15)-C(16)      | 1.360(2)   |
| C(15)-H(15)      | 0.9500     |
| C(16)-H(16)      | 0.9500     |
| C(17)-H(17A)     | 0.9800     |
| C(17)-H(17B)     | 0.9800     |
| C(17)-H(17C)     | 0.9800     |
| C(18)-C(19)      | 1.381(2)   |
| C(18)-H(18)      | 0.9500     |
| C(19)-H(19)      | 0.9500     |
| C(2)-O(1)-C(1)   | 115.81(12) |
| C(6)-O(3)-C(17)  | 116.64(12) |
| C(6)-N(1)-C(5)   | 120.42(13) |
| C(14)-N(2)-C(16) | 106.52(13) |
| C(14)-N(2)-C(13) | 125.05(13) |
| C(16)-N(2)-C(13) | 128.44(13) |
| C(14)-N(3)-C(15) | 104.23(13) |
| O(1)-C(1)-H(1A)  | 109.5      |
| O(1)-C(1)-H(1B)  | 109.5      |
| H(1A)-C(1)-H(1B) | 109.5      |
| O(1)-C(1)-H(1C)  | 109.5      |
| H(1A)-C(1)-H(1C) | 109.5      |
| H(1B)-C(1)-H(1C) | 109.5      |
| O(2)-C(2)-O(1)   | 123.23(15) |
| O(2)-C(2)-C(3)   | 123.95(15) |
| O(1)-C(2)-C(3)   | 112.81(13) |
| C(11)-C(3)-C(4)  | 120.20(14) |
| C(11)-C(3)-C(2)  | 117.68(13) |
| C(4)-C(3)-C(2)   | 122.12(14) |
| C(5)-C(4)-C(3)   | 120.64(15) |

|                   |            |
|-------------------|------------|
| C(5)-C(4)-H(4)    | 119.7      |
| C(3)-C(4)-H(4)    | 119.7      |
| C(4)-C(5)-C(13)   | 118.16(13) |
| C(4)-C(5)-N(1)    | 118.69(14) |
| C(13)-C(5)-N(1)   | 123.11(13) |
| N(1)-C(6)-O(3)    | 120.18(14) |
| N(1)-C(6)-C(7)    | 128.49(14) |
| O(3)-C(6)-C(7)    | 111.32(12) |
| C(8)-C(7)-C(18)   | 119.35(15) |
| C(8)-C(7)-C(6)    | 120.10(14) |
| C(18)-C(7)-C(6)   | 120.49(13) |
| C(9)-C(8)-C(7)    | 119.86(15) |
| C(9)-C(8)-H(8)    | 120.1      |
| C(7)-C(8)-H(8)    | 120.1      |
| C(8)-C(9)-C(10)   | 120.58(15) |
| C(8)-C(9)-H(9)    | 119.7      |
| C(10)-C(9)-H(9)   | 119.7      |
| C(19)-C(10)-C(9)  | 119.76(16) |
| C(19)-C(10)-H(10) | 120.1      |
| C(9)-C(10)-H(10)  | 120.1      |
| C(12)-C(11)-C(3)  | 119.79(14) |
| C(12)-C(11)-H(11) | 120.1      |
| C(3)-C(11)-H(11)  | 120.1      |
| C(11)-C(12)-C(13) | 120.27(15) |
| C(11)-C(12)-H(12) | 119.9      |
| C(13)-C(12)-H(12) | 119.9      |
| C(12)-C(13)-C(5)  | 120.71(14) |
| C(12)-C(13)-N(2)  | 117.19(14) |
| C(5)-C(13)-N(2)   | 122.04(13) |
| N(3)-C(14)-N(2)   | 112.79(15) |
| N(3)-C(14)-H(14)  | 123.6      |
| N(2)-C(14)-H(14)  | 123.6      |
| C(16)-C(15)-N(3)  | 111.33(15) |



|                     |            |
|---------------------|------------|
| C(16)-C(15)-H(15)   | 124.3      |
| N(3)-C(15)-H(15)    | 124.3      |
| C(15)-C(16)-N(2)    | 105.12(15) |
| C(15)-C(16)-H(16)   | 127.4      |
| N(2)-C(16)-H(16)    | 127.4      |
| O(3)-C(17)-H(17A)   | 109.5      |
| O(3)-C(17)-H(17B)   | 109.5      |
| H(17A)-C(17)-H(17B) | 109.5      |
| O(3)-C(17)-H(17C)   | 109.5      |
| H(17A)-C(17)-H(17C) | 109.5      |
| H(17B)-C(17)-H(17C) | 109.5      |
| C(19)-C(18)-C(7)    | 120.35(15) |
| C(19)-C(18)-H(18)   | 119.8      |
| C(7)-C(18)-H(18)    | 119.8      |
| C(18)-C(19)-C(10)   | 120.07(15) |
| C(18)-C(19)-H(19)   | 120.0      |
| C(10)-C(19)-H(19)   | 120.0      |

Symmetry transformations used to generate equivalent atoms:

Table 4. Anisotropic displacement parameters ( $\text{\AA}^2 \times 10^3$ ) for mo\_120626lt\_0m. The anisotropic displacement factor exponent takes the form:  $-2\pi^2 [ h^2 a^{*2} U^{11} + \dots + 2 h k a^* b^* U^{12} ]$

|       | U <sup>11</sup> | U <sup>22</sup> | U <sup>33</sup> | U <sup>23</sup> | U <sup>13</sup> | U <sup>12</sup> |
|-------|-----------------|-----------------|-----------------|-----------------|-----------------|-----------------|
| O(1)  | 17(1)           | 31(1)           | 39(1)           | 8(1)            | 2(1)            | -1(1)           |
| O(2)  | 21(1)           | 25(1)           | 54(1)           | 8(1)            | 8(1)            | -5(1)           |
| O(3)  | 20(1)           | 19(1)           | 34(1)           | 2(1)            | 11(1)           | -3(1)           |
| N(1)  | 18(1)           | 17(1)           | 28(1)           | 2(1)            | 6(1)            | 0(1)            |
| N(2)  | 19(1)           | 19(1)           | 26(1)           | 0(1)            | 6(1)            | 0(1)            |
| N(3)  | 23(1)           | 34(1)           | 30(1)           | 4(1)            | 6(1)            | 4(1)            |
| C(1)  | 19(1)           | 39(1)           | 44(1)           | 4(1)            | -1(1)           | 0(1)            |
| C(2)  | 20(1)           | 17(1)           | 33(1)           | -4(1)           | 9(1)            | 0(1)            |
| C(3)  | 19(1)           | 15(1)           | 32(1)           | -2(1)           | 8(1)            | 0(1)            |
| C(4)  | 21(1)           | 16(1)           | 28(1)           | 2(1)            | 7(1)            | 2(1)            |
| C(5)  | 20(1)           | 12(1)           | 29(1)           | 0(1)            | 9(1)            | 0(1)            |
| C(6)  | 17(1)           | 21(1)           | 23(1)           | 1(1)            | 4(1)            | -2(1)           |
| C(7)  | 21(1)           | 19(1)           | 24(1)           | -2(1)           | 8(1)            | 0(1)            |
| C(8)  | 20(1)           | 25(1)           | 33(1)           | -4(1)           | 6(1)            | 1(1)            |
| C(9)  | 28(1)           | 26(1)           | 40(1)           | -2(1)           | 5(1)            | 9(1)            |
| C(10) | 40(1)           | 18(1)           | 39(1)           | 0(1)            | 12(1)           | 6(1)            |
| C(11) | 22(1)           | 18(1)           | 34(1)           | 2(1)            | 12(1)           | -2(1)           |
| C(12) | 26(1)           | 19(1)           | 28(1)           | 4(1)            | 10(1)           | 1(1)            |
| C(13) | 19(1)           | 15(1)           | 27(1)           | -2(1)           | 6(1)            | 1(1)            |
| C(14) | 25(1)           | 25(1)           | 29(1)           | 4(1)            | 7(1)            | 2(1)            |
| C(15) | 23(1)           | 32(1)           | 27(1)           | -3(1)           | 7(1)            | -2(1)           |
| C(16) | 22(1)           | 23(1)           | 30(1)           | -3(1)           | 8(1)            | -2(1)           |
| C(17) | 26(1)           | 18(1)           | 46(1)           | 4(1)            | 14(1)           | -3(1)           |
| C(18) | 22(1)           | 22(1)           | 30(1)           | -2(1)           | 8(1)            | 0(1)            |
| C(19) | 32(1)           | 20(1)           | 37(1)           | -5(1)           | 12(1)           | -4(1)           |

Table 5. Hydrogen coordinates ( $\times 10^4$ ) and isotropic displacement parameters ( $\text{\AA}^2 \times 10^{-3}$ )  
for mo\_120626lt\_0m.

|        | x     | y     | z    | U(eq) |
|--------|-------|-------|------|-------|
| H(1A)  | 3405  | 865   | 4807 | 53    |
| H(1B)  | 3498  | 2386  | 4627 | 53    |
| H(1C)  | 3083  | 1873  | 5577 | 53    |
| H(4)   | 6940  | 2095  | 5931 | 25    |
| H(8)   | 12097 | 448   | 6957 | 31    |
| H(9)   | 12474 | -1755 | 7179 | 38    |
| H(10)  | 10957 | -3260 | 6764 | 38    |
| H(11)  | 6071  | -245  | 7991 | 29    |
| H(12)  | 7997  | -116  | 8867 | 29    |
| H(14)  | 10009 | -974  | 8815 | 31    |
| H(15)  | 12315 | 1843  | 9413 | 32    |
| H(16)  | 10516 | 2809  | 8430 | 29    |
| H(17A) | 10064 | 3936  | 5514 | 44    |
| H(17B) | 11464 | 4103  | 5749 | 44    |
| H(17C) | 10750 | 4078  | 6612 | 44    |
| H(18)  | 8661  | -356  | 5879 | 29    |
| H(19)  | 9054  | -2557 | 6091 | 35    |
